# Supplementary material for: Noroviruses subvert the core stress granule component G3BP1 to promote viral VPg-dependent translation
Source: eLife. 2019 Aug 12;8:e46681. doi: 10.7554/eLife.46681 (PMC6739877; doi:10.7554/eLife.46681)
Supplement: Supplementary file 1. — (A) Log2 SILAC ratio of proteins identified in Norwalk virus (NV) VPg GFP Trap pull downs. The experimental details are provided in the Materials and methods. SILAC ratios were computed by comparing the ratio of the peptides for each protein in the GFP control pull down to that obtained with the NV-GFP fusion protein. As described in the text each experiment was performed in three independent conditions varying the label in each biological sample. M/L – medium vs light sample, H/L – heavy vs light labelled sample and M/L – medium vs light sample. (B) As described in panel A but as obtained using the MNV VPg-GFP fusion protein as the bait. [file elife-46681-supp1.xlsx]

## Sheet: A)NV VPg Compared to GFP
Protein IDs	Protein names	Gene names	Peptides	Unique peptides	Peptides 4	Peptides 5	Peptides 6	Sequence coverage [%]	Score	Log2 M/L 4	Log2 H/L 5	Log2 M/L 6	Ratio M/L variability [%] 4	Ratio H/L variability [%] 5	Ratio M/L variability [%] 6	Ratio M/L count 4	Ratio H/L count 5	Ratio M/L count 6
A0A0B4J1Z1;C9JAB2;Q16629	Serine/arginine-rich splicing factor 7	SRSF7	5	4	3	2	4	33.6	9.5508	5.06785		5.01672	52.825	NaN	52.064	2	1	2
O60506;F6UXX1	Heterogeneous nuclear ribonucleoprotein Q	SYNCRIP	16	2	9	8	8	28.1	121.72	4.49934		3.94035	24.167	NaN	34.802	3	1	2
G3V576;G3V4W0;B4DY08;B2R5W2;G3V4C1;G3V2Q1;P07910;G3V555;G3V575;G3V5X6;G3V3K6;G3V251;B4DSU6;A0A0G2JPF8;A0A0G2JNQ3;P0DMR1;O60812;B7ZW38;B2RXH8;G3V4M8;G3V2H6;G3V5V7;G3V2D6	Heterogeneous nuclear ribonucleoproteins C1/C2;Heterogeneous nuclear ribonucleoprotein C-like 4;Heterogeneous nuclear ribonucleoprotein C-like 1;Heterogeneous nuclear ribonucleoprotein C-like 3;Heterogeneous nuclear ribonucleoprotein C-like 2	HNRNPC;HNRNPCL4;HNRNPCL1;HNRNPCL3;HNRNPCL2	11	11	6	6	6	38.1	65.362	3.35106		3.49812	43.874	NaN	65.36	2	0	2
Q9NR30	Nucleolar RNA helicase 2	DDX21	20	18	7	8	9	29.4	299.85	3.17986		2.54104	23.467	NaN	3.1882	2	1	2
P62857	40S ribosomal protein S28	RPS28	2	2	2	1	2	30.4	137.48	2.27665		2.17322	5.02	NaN	19.758	2	1	2
E7EUU4;A0A0A0MR52;C9K073;C9J2Z7;H7C044;H7C0V6;C9JHW9;C9JIH5;C9JWH7;C9J556;REV__F5H7J8;C9JSU8;C9JWW9;REV__Q8NEG2;REV__C9JQZ6;REV__J3KQX6		EIF4G1	69	1	49	52	49	38.3	323.31	6.9166	7.12216	6.68552	35.042	70.655	112.92	6	11	6
P11940;E7EQV3;A0A087WTT1;E7ERJ7;Q9H361;H0YBN4;E5RGH3;H0YAP2;E5RJB9;H0YAS6;H0YB75;E5RH24;Q4VXU2;H0YAS7;H0YC10;E5RHG7;H0YAW6;E5RGC4;E5RFD8;Q96DU9	Polyadenylate-binding protein 1;Polyadenylate-binding protein	PABPC1	32	8	24	23	26	44.2	323.31	6.32456	6.20265	6.23362	26.447	37.985	20.618	8	12	11
NV_VPgF137A;NV_VPg		VPg	16	16	14	15	14	52.9	323.31	5.28047	6.18945	5.29267	23.148	45.551	79.73	4	4	5
B0QY89;Q9Y262;B0QY90;C9JHP4;C9K0Q7;H7C3A0;H0Y7E6	Eukaryotic translation initiation factor 3 subunit L	EIF3L	25	25	17	14	16	39.7	323.31	5.88989	6.02954	5.72713	54.019	93.783	79.359	4	3	4
Q14152	Eukaryotic translation initiation factor 3 subunit A	EIF3A	54	54	30	32	30	37.5	323.31	6.02379	5.94101		27.215	77.665	NaN	2	3	1
P60842;J3KT12;J3QS69;J3KTB5;J3QL43;J3KSZ0;J3QR64;J3KTN0;J3QLN6;J3KS25;J3QKZ9;J3QL52;J3KT04;J3KS93;J3QQP0;E7EMV8;E9PBH4;F8WE11;C9JUF0	Eukaryotic initiation factor 4A-I	EIF4A1	25	13	21	21	17	54.2	323.31	6.29109	5.9006	5.92015	84.842	77.001	44.188	11	14	4
P60228;E5RGA2;H0YBR5;H0YAW4;E5RHS5;E5RIT4;E5RII3;E5RIP5;E5RJ25;H0YBP5	Eukaryotic translation initiation factor 3 subunit E	EIF3E	21	21	17	16	17	47.6	323.31	6.08511	5.8672	5.62568	4.295	19.05	14.57	2	2	6
B1ANR0;Q13310;H0YEQ8;B1ANR1	Polyadenylate-binding protein;Polyadenylate-binding protein 4	PABPC4	32	1	20	22	26	41.5	284.03		5.83443	6.56502	NaN	49.651	16.428	1	3	2
Q14444;A0A087X082;E9PLA9;G3V153	Caprin-1	CAPRIN1	10	10	8	8	6	13.4	309.34	5.97205	5.73587	5.927	3.5363	73.025	7.014	2	3	3
P62424;Q5T8U2;Q5T8U3	60S ribosomal protein L7a	RPL7A	18	18	10	11	12	45.5	323.31	3.80416	5.43736	4.18031	163.59	20.562	179.72	3	3	3
Q13283;E5RIZ6;E5RI46;E5RIF8;E5RH42;E5RJU8;E5RH00	Ras GTPase-activating protein-binding protein 1	G3BP1	16	14	11	9	8	38.6	323.31	5.647	5.42307	5.39767	85.339	33.21	37.527	3	3	2
P62917;E9PKZ0;E9PKU4;E9PP36;G3V1A1	60S ribosomal protein L8	RPL8	8	8	4	3	5	22.6	112.35	4.07758	5.21909		227.71	128.88	NaN	2	2	1
C9JXB8;C9JNW5;P83731	60S ribosomal protein L24	RPL24	6	6	6	4	6	41.3	202.29	4.34248	5.16426	4.44453	14.876	19.827	13.44	3	2	3
M0R117;Q02543;M0R3D6;M0R1A7;M0R0P7	60S ribosomal protein L18a	RPL18A	9	9	7	6	4	46.8	222.24	4.03025	5.07498	4.13315	12.919	15.927	11.743	2	3	2
Q99613;B5ME19;H3BPE4;H3BPE3;H3BTY8	Eukaryotic translation initiation factor 3 subunit C;Eukaryotic translation initiation factor 3 subunit C-like protein	EIF3C;EIF3CL	29	29	21	19	23	31.9	323.31	5.68342	5.06281	5.63639	45.536	29.053	27.658	3	3	3
P62906	60S ribosomal protein L10a	RPL10A	10	10	6	5	6	39.6	224.13	3.88557	5.06208	3.8126	21.245	111.67	14.852	2	2	2
P67809;A0A087X1S2;H0Y449;C9J5V9;Q9Y2T7	Nuclease-sensitive element-binding protein 1	YBX1	16	10	12	12	12	52.8	323.31	5.38004	4.99503		33.329	73.768	NaN	2	3	1
J3QQ67;Q07020;G3V203;H0YHA7;F8VYV2;F8VUA6;A0A075B7A0;F8VXR6	60S ribosomal protein L18	RPL18	8	8	6	7	7	42.1	261.54		4.99499	3.27078	NaN	69.867	7.4628	1	4	2
P36578;H3BM89;H3BTP7;H3BU31	60S ribosomal protein L4	RPL4	21	21	11	12	8	46.1	231.11	3.56767	4.88962	2.1624	129.12	34.343	142.44	3	3	2
P22626;A0A087WUI2	Heterogeneous nuclear ribonucleoproteins A2/B1	HNRNPA2B1	16	16	12	13	12	55.5	323.31	5.03122	4.8773	4.77394	14.79	56.943	27.102	2	7	6
P46776;E9PJD9;E9PLL6;E9PLX7	60S ribosomal protein L27a	RPL27A	5	5	4	4	3	34.5	116.89		4.84338	4.11977	NaN	14.73	2.3143	1	2	2
E7EPB3;P50914	60S ribosomal protein L14	RPL14	5	5	4	5	4	41.9	127.15	3.93263	4.82497		19.151	61.596	NaN	3	3	1
F8W6I7;P09651;F8VTQ5;F8VZ49;Q32P51;H0YH80;F8W646;F8VYN5	Heterogeneous nuclear ribonucleoprotein A1;Heterogeneous nuclear ribonucleoprotein A1, N-terminally processed;Heterogeneous nuclear ribonucleoprotein A1-like 2	HNRNPA1;HNRNPA1L2	15	15	9	9	10	48.5	304.36	4.85449	4.7903	4.4138	59.512	84.785	38.567	7	13	8
Q08211	ATP-dependent RNA helicase A	DHX9	30	30	15	20	14	27.3	313.07	4.63424	4.77547	4.52406	27.675	59.003	23.913	2	4	3
P18124;A8MUD9;C9JIJ5;C9JZ88	60S ribosomal protein L7	RPL7	15	15	6	11	8	44.4	89.744		4.76734	3.67141	NaN	54.262	80.789	1	4	3
E5RI99;P62888;A0A0B4J213;E5RJH3;A0A0C4DH44	60S ribosomal protein L30	RPL30	6	6	6	6	6	58.8	323.31	3.31372	4.73763	3.16128	26.485	14.585	22.405	2	2	2
P42766;F2Z388	60S ribosomal protein L35	RPL35	3	3	2	2	2	26	142.89		4.73455	4.21901	NaN	92.236	41.752	1	2	2
P26373;J3QSB4;H3BUK8;H3BTH3;J3KS98	60S ribosomal protein L13	RPL13	7	7	5	5	5	34.1	323.31	3.7041	4.7062	3.7252	29.194	29.849	14.424	5	4	4
P39023;G5E9G0;B5MCW2;H7C422;H7C3M2;F8WCR1;Q92901	60S ribosomal protein L3	RPL3	13	13	8	10	10	28.5	145.13	3.8506	4.70526	4.21397	187.39	159.83	33.208	5	6	3
P61254;J3QRI7;J3QQQ9;J3QQV1;J3KTJ8;E5RIT6;J3QRC4;J3KSS0;E5RHH1;J3KS10	60S ribosomal protein L26	RPL26;RPL26L1	10	2	8	10	6	48.3	107.25	4.02521	4.69282	4.03949	19.688	26.444	15.176	3	3	2
P62753;A2A3R7;A2A3R5	40S ribosomal protein S6	RPS6	5	5	3	4	4	19.3	276.51		4.67452	3.90092	NaN	54.918	46.956	0	4	2
I3L3P7;P62244;I3L246;H3BN98;H3BV27;H3BT37;I3L303;H3BVC7	40S ribosomal protein S15a	RPS15A	6	6	5	6	5	59	100.39	4.40722	4.65901	4.31817	64.191	56.147	64.783	2	3	2
P62241;Q5JR95	40S ribosomal protein S8	RPS8	12	12	7	10	6	58.2	323.31	3.88196	4.65002	3.88118	11.926	40.453	32.982	5	4	4
P62280;M0QZC5;M0R1H5;M0R1H6	40S ribosomal protein S11	RPS11	14	14	8	10	8	57.6	64.636	4.22365	4.62813	3.7967	132.52	107.61	174.83	8	6	6
P61353;K7ELC7;K7EQQ9;K7ERY7	60S ribosomal protein L27	RPL27	6	6	5	4	3	43.4	76.463	3.64685	4.57809	3.43989	12.939	23.656	14.574	4	4	2
P62701;C9JEH7;Q8TD47;P22090	40S ribosomal protein S4, X isoform	RPS4X	16	16	10	10	13	56.7	243.19	4.43949	4.55759	3.87214	236.6	63.859	70.791	2	6	7
P62081;B5MCP9	40S ribosomal protein S7	RPS7	6	6	5	4	3	23.2	12.453	4.00513	4.49768	3.73812	10.752	38.835	8.9427	3	2	3
K7ERI7;P35268;K7EP65;K7EKS7;K7ELC4;K7EMH1;K7EJT5	60S ribosomal protein L22	RPL22	4	4	2	2	2	42.1	66.029	3.65489	4.43836		18.691	36.503	NaN	2	2	1
P62277;J3KMX5;E9PS50	40S ribosomal protein S13	RPS13	8	8	3	3	3	49.7	230.64	4.15769	4.42781	4.00477	7.5534	5.8857	2.2549	2	2	2
P05388;F8VWS0;Q8NHW5;F8VU65;F8VPE8;G3V210;F8VQY6;F8VRK7;F8VW21;F8VWV4;F8VS58;F8VZS0;F8W1K8	60S acidic ribosomal protein P0;60S acidic ribosomal protein P0-like	RPLP0;RPLP0P6	11	11	6	6	7	40.7	250.23	3.31497	4.42533	3.25991	27.01	52.923	21.946	5	5	5
P84103;A0A087X2D0	Serine/arginine-rich splicing factor 3	SRSF3	7	6	3	6	4	36	80.977		4.39314	3.58652	NaN	154.44	49.739	1	2	2
A0A024R4M0;P46781;B5MCT8;C9JM19;F2Z3C0;A8MXK4	40S ribosomal protein S9	RPS9	11	11	8	6	8	41.2	70.075	4.16848	4.31288	4.11678	14.015	68.134	8.3835	4	4	5
H7BY10;K7EJV9;K7ERT8;A8MUS3;P62750;K7EMA7	60S ribosomal protein L23a	RPL23A	8	8	5	7	7	34.2	126.53	3.44414	4.27851	3.16749	0.59484	79.599	36.967	2	5	6
A0A0D9SFB3;A0A0D9SG12;A0A0D9SF53;O00571;O15523;A0A0J9YVQ7;A0A087WVZ1;A0A0J9YYH6;C9J081;B4DLA0;C9J8G5;D6RCM4;Q9NQI0;A0A087WX09;H0Y960	ATP-dependent RNA helicase DDX3X;ATP-dependent RNA helicase DDX3Y	DDX3X;DDX3Y	22	21	14	12	13	39.1	317.99	4.76495	4.27038	4.62352	43.482	96.936	48.796	6	5	6
Q9NZI8	Insulin-like growth factor 2 mRNA-binding protein 1	IGF2BP1	22	20	19	17	14	46.1	323.31	5.19543	4.26491	5.44652	56.419	67.914	20.136	3	6	3
P61247;D6RG13;D6RAT0;D6RB09;E9PFI5;H0Y9Y4;H0Y8L7;D6R9B6;D6RAS7;D6RED7;D6RI02;D6RGE0	40S ribosomal protein S3a	RPS3A	13	13	7	11	7	51.5	82.826	3.9606	4.22674	3.55311	3.2664	62.244	10.334	2	4	4
Q14103;H0YA96;H0Y8G5;D6RAF8;D6RF44;D6RBQ9;D6RD83	Heterogeneous nuclear ribonucleoprotein D0	HNRNPD	12	11	6	6	6	36.3	120.67	4.81819	4.22612	4.32869	172.43	73.188	178.62	4	4	4
P62913;Q5VVC8;Q5VVC9	60S ribosomal protein L11	RPL11	7	7	6	6	7	37.1	255.11	3.72094	4.21171	3.47975	95.322	83.214	57.018	3	6	3
P15880;H0YEN5;E9PQD7;I3L404;E9PM36;E9PMM9;E9PPT0;H3BNG3;H0YE27	40S ribosomal protein S2	RPS2	13	13	8	6	7	42.7	182.69	3.87568	4.19061	3.69588	25.308	50.462	23.947	3	3	2
P52272;A0A087X0X3;M0R019;M0R2T0;M0R0N3;M0R2I7;M0QYQ7;M0R0Y6;M0QY96;M0QYL3	Heterogeneous nuclear ribonucleoprotein M	HNRNPM	32	17	20	23	21	50.4	281.94	3.38184	4.18785	3.49006	140.74	64.106	124.17	6	6	8
Q12906;K7EQR9;K7EKJ9;Q96SI9;K7EQ75;K7ERM6;K7ENK6;K7EM82;K7EJ09;K7ER69	Interleukin enhancer-binding factor 3	ILF3	15	15	9	10	10	19	121.36	2.20983	4.18325	3.93272	138.17	120.55	122.71	2	3	3
P06748;E5RI98;E5RGW4	Nucleophosmin	NPM1	8	8	4	4	3	36.7	323.31	3.18572	4.18158	3.06126	22.613	31.496	23.504	5	5	4
P30050	60S ribosomal protein L12	RPL12	6	6	4	4	3	54.5	323.31	3.26568	4.12961	3.17631	35.958	39.635	2.2481	3	4	2
J3KTA4;P17844;J3QSF1;J3KRZ1;J3QRQ7;J3QR02;J3KRX8;X6RLV5	Probable ATP-dependent RNA helicase DDX5	DDX5	27	19	17	23	18	39.6	286.16	4.19077	4.1254	4.04045	30.291	69.351	81.94	8	12	7
P62851	40S ribosomal protein S25	RPS25	6	6	4	5	4	38.4	231.32	3.87578	4.09356	3.55004	166.43	94.025	29.84	4	5	3
P19338;H7BY16;C9JYW2;C9JLB1;C9J1H7;C9JWL1	Nucleolin	NCL	21	21	10	13	10	27.2	323.31	3.39273	3.98586	3.20892	22.054	69.52	135.16	7	11	6
P62269;A0A0G2JQH2;Q5GGW2;J3JS69	40S ribosomal protein S18	RPS18	12	12	9	10	9	54.6	323.31	3.87657	3.9619	3.77684	23.384	87.119	49.028	8	10	9
H3BLZ8;Q92841;A0A0U1RQJ0	Probable ATP-dependent RNA helicase DDX17	DDX17	21	13	13	17	15	35.6	323.31		3.95541	4.09542	NaN	80.57	12.266	1	3	3
P39019;M0R2L9;M0QXK4;M0QYF7;M0R140;A0A075B6E2	40S ribosomal protein S19	RPS19	10	10	7	7	6	49.7	100.66	3.84207	3.8748	3.64824	79.195	91.715	54.879	4	7	5
P62249;M0R210;A0A087WZ27;M0R3H0;M0R1M5;M0QX76;Q6IPX4	40S ribosomal protein S16	RPS16;ZNF90	9	9	5	6	7	54.1	157.21	3.6241	3.85699	3.23488	67.83	88.417	102.55	4	4	5
Q15233;H7C367;C9JYS8;C9IZL7;C9J4X2	Non-POU domain-containing octamer-binding protein	NONO	19	18	8	7	7	43.7	309.37	4.02148	3.80395	4.51299	14.923	100.09	59.629	3	4	5
P38919;I3L3H2	Eukaryotic initiation factor 4A-III;Eukaryotic initiation factor 4A-III, N-terminally processed	EIF4A3	16	11	10	11	8	28.5	165.8	4.3335	3.79015		4.8932	49.928	NaN	2	2	0
Q00839;Q5RI18	Heterogeneous nuclear ribonucleoprotein U	HNRNPU	21	21	14	14	12	26.1	323.31	3.87971	3.77747	3.63006	58.37	76.426	44.667	8	11	9
P23246;H0Y9K7;H0Y9U2	Splicing factor, proline- and glutamine-rich	SFPQ	22	21	10	8	7	37.2	281.23	4.26776	3.73541		40.417	70.834	NaN	3	3	0
P62829;C9JD32;J3KT29;J3KTJ3;B9ZVP7;J3QQT9	60S ribosomal protein L23	RPL23	6	6	3	3	4	50	55.091	3.36513	3.72378	2.92998	46.543	32.538	28.792	2	2	4
A0A0U1RRM4;P26599;A6NLN1;A0A0D9SF20;K7EKJ7;K7EK45;A0A087WUW5;K7ELW5;K7ES59;A0A087WU68;X6R242;O95758	Polypyrimidine tract-binding protein 1	PTBP1	9	9	5	6	7	16.7	103.11		3.69977	4.14331	NaN	56.766	49.215	1	3	2
P23396;E9PL09;E9PPU1;F2Z2S8;H0YCJ7;H0YF32;H0YEU2;E9PQ96;E9PJH4;E9PK82;E9PSF4;E9PQX2;H0YES8;E9PJN9	40S ribosomal protein S3	RPS3	19	19	9	12	7	68.3	323.31	3.63552	3.62656	3.52281	11.895	23.74	37.795	7	9	6
H0YN88;A0A075B716;P08708;H0YN73	40S ribosomal protein S17	RPS17	3	3	3	3	3	16.2	20.222		3.61259	3.49262	NaN	42.755	174.69	1	2	4
A0A087WXM6;J3QQT2;J3KRX5;A0A0A6YYL6;P18621;A0A087WY81;J3KRB3;A0A087WWH0;J3QS96;J3QLC8;A0A0A0MRF8;J3KSJ0	60S ribosomal protein L17	RPL17;RPL17-C18orf32	5	5	4	5	4	26	48.684		3.50602	2.7144	NaN	70.713	219.01	1	2	3
P25398	40S ribosomal protein S12	RPS12	6	6	5	4	4	40.2	18.054	3.78545	3.44665	3.49659	4.1227	108.69	2.5382	3	3	2
G8JLB6;P31943;E9PCY7;D6RIT2;D6RIU0;D6RBM0;E7EQJ0;D6RAM1;D6R9T0;D6RFM3;D6RDU3;D6RJ04;D6RIH9;E7EN40;H0YB39;D6RDL0;E5RGV0;H0YBD7;D6RF17;H0YBG7;D6R9D3;E5RGH4;E5RJ94;H0YAQ2	Heterogeneous nuclear ribonucleoprotein H;Heterogeneous nuclear ribonucleoprotein H, N-terminally processed	HNRNPH1	15	10	7	7	8	43.2	311.21		3.44255	3.67243	NaN	9.8708	14.765	1	4	2
P09874;Q5VX84;Q5VX85	Poly [ADP-ribose] polymerase 1	PARP1	39	39	17	20	16	38.8	323.31	2.49203	2.96316	1.92086	70.893	82.231	115.78	5	13	7
P41091;Q2VIR3;F8W810;H7BZU1	Eukaryotic translation initiation factor 2 subunit 3;Putative eukaryotic translation initiation factor 2 subunit 3-like protein	EIF2S3;EIF2S3L	13	13	6	6	5	33.9	44.005		2.77425	2.60763	NaN	51.607	44.061	0	2	2
P61978;Q5T6W2;S4R457;S4R359	Heterogeneous nuclear ribonucleoprotein K	HNRNPK	15	15	9	10	7	43.4	323.31	3.10672	2.6301	3.31095	38.928	52.999	136.35	4	6	3
P62318;H3BT13	Small nuclear ribonucleoprotein Sm D3	SNRPD3	4	4	2	2	2	37.3	32.904	2.37284	2.39723		35.123	77.353	NaN	2	2	1
Q8NC51	Plasminogen activator inhibitor 1 RNA-binding protein	SERBP1	15	15	11	9	11	37.5	323.31	2.40996	2.37859	2.04324	71.743	100.42	96.169	7	10	9
P10412;P16402;P22492;Q02539	Histone H1.4;Histone H1.3	HIST1H1E;HIST1H1D	8	1	5	7	6	24.7	55.994	1.54691	2.25722	2.87338	162.91	62.489	156.82	5	6	5
P13010;C9JZ81;H7C0H9	X-ray repair cross-complementing protein 5	XRCC5	19	19	5	6	4	24.3	154.86		2.12899	2.51876	NaN	42.228	2.1067	1	4	2
P60866;E5RJX2;E5RIP1;G3XAN0	40S ribosomal protein S20	RPS20	4	4	3	3	1	28.6	87.244	1.99671	2.06143		38.431	102	NaN	3	4	1
P63173;J3KT73;J3QL01;J3KSP2	60S ribosomal protein L38	RPL38	5	5	3	3	3	50	21.835		1.92729	1.54755	NaN	96.275	73.552	1	2	2
P12956;B1AHC9	X-ray repair cross-complementing protein 6	XRCC6	21	21	5	9	5	40.1	119.28		1.84567	2.14639	NaN	46.289	44.347	1	3	3
A0A0G2JIW1;P0DMV9;P0DMV8;V9GZ37	Heat shock 70 kDa protein 1B;Heat shock 70 kDa protein 1A	HSPA1B;HSPA1A	26	14	20	18	20	44.7	323.31	1.78555	1.64353	1.59975	108.88	82.983	103.22	22	27	22
P11142;E9PKE3;E9PN89;E9PNE6;A8K7Q2;E9PLF4;E9PQQ4;E9PQK7;E9PK54;E9PPY6;P54652;E9PI65;E9PN25;E9PS65;E9PM13	Heat shock cognate 71 kDa protein	HSPA8	27	24	18	21	20	41.2	323.31	1.51273	1.35699	1.45312	123.86	62.624	123.7	19	25	25
Q9P258	Protein RCC2	RCC2	16	16	4	2	2	33.7	50.359	1.12763	1.09916	0.845269	76.142	1.1947	19.97	4	2	2
P38646;D6RJI2;D6RA73;H0YBG6;H0Y8S0	Stress-70 protein, mitochondrial	HSPA9	18	18	8	9	9	33.7	316.08	1.56404	0.845189	1.1501	34.818	58.512	23.007	4	6	5
P05141;Q9H0C2	ADP/ATP translocase 2;ADP/ATP translocase 2, N-terminally processed	SLC25A5	14	5	8	7	6	40.9	105.31	0.975924	0.827087	0.973721	22.435	84.248	32.784	5	8	6
P61221;D6R9I9;H0Y990;D6RGF4	ATP-binding cassette sub-family E member 1	ABCE1	4	4	1	1	1	9.3	28.224	1.30363	0.731096		30.136	26.145	NaN	2	2	1
P12236	ADP/ATP translocase 3;ADP/ATP translocase 3, N-terminally processed	SLC25A6	12	2	8	6	5	35.9	12.657	0.672923	0.714839		15.9	6.4281	NaN	2	2	1
C9J9K3;A0A0C4DG17;P08865;F8WD59	40S ribosomal protein SA	RPSA	11	11	7	6	5	50.4	192.18	1.29813	0.623773	0.992986	12.161	99.49	26.331	2	5	4
P63244;J3KPE3;H0Y8W2;H0YAF8;D6RHH4;H0YAM7;D6RAC2;D6RFX4;D6R9Z1;D6R9L0;D6REE5;H0Y8R5;D6RBD0;D6RAU2;E9PD14;D6RFZ9;D6RF23;H0Y9P0;D6RGK8;D6R909;D6RHJ5	Guanine nucleotide-binding protein subunit beta-2-like 1;Guanine nucleotide-binding protein subunit beta-2-like 1, N-terminally processed	GNB2L1	14	14	7	7	7	55.2	323.31	1.1696	0.516419	1.04852	149.53	96.362	26.938	5	4	4
P11021	78 kDa glucose-regulated protein	HSPA5	19	18	8	10	8	35.9	323.31	0.962142	0.509645	0.719753	28.643	71.586	28.201	4	6	4

## Sheet: B) MNV VPg Compared to GFP
Protein IDs	Protein names	Gene names	Peptides	Unique peptides	Peptides 1	Peptides 2	Peptides 3	Sequence coverage [%]	Score	Log2 M/L 1	Log2 M/L 2	Log2 H/L 3	Ratio M/L variability [%] 1	Ratio M/L variability [%] 2	Ratio H/L variability [%] 3	Ratio M/L count 1	Ratio M/L count 2	Ratio H/L count 3
Q86V81;E9PB61	THO complex subunit 4	ALYREF	4	4	3	2	3	22.2	115.31		1.71035	1.80991	NaN	29.135	36.26	1	2	2
Q9Y224;G3V4C6;H0YJB9;G3V4E7	UPF0568 protein C14orf166	C14orf166	7	7	3	3	1	33.2	16.629	2.05419	2.26219		70.731	11.953	NaN	2	4	1
F1T0B3;A0A087X2G1;Q92499	ATP-dependent RNA helicase DDX1	DDX1	16	16	6	6	4	29.3	136.4	1.88186	2.35358	1.40469	15.765	10.926	40.701	3	3	3
H3BLZ8;Q92841;A0A0U1RQJ0	Probable ATP-dependent RNA helicase DDX17	DDX17	21	13	14	14	11	35.6	323.31	1.38852	2.00741	1.69006	38.234	14.106	69.481	9	9	8
J3KTA4;P17844;J3QSF1;J3KRZ1;J3QRQ7;J3QR02;J3KRX8;X6RLV5	Probable ATP-dependent RNA helicase DDX5	DDX5	27	19	16	12	13	39.6	286.16	1.27882	1.90462	1.90254	25.399	11.841	55.394	16	14	12
Q14152	Eukaryotic translation initiation factor 3 subunit A	EIF3A	54	54	33	29	28	37.5	323.31	3.28343	3.38474	3.05946	54.722	14.254	72.702	23	21	13
P55884;C9JZG1;C9JQN7	Eukaryotic translation initiation factor 3 subunit B	EIF3B	32	32	25	26	19	40.9	323.31	3.24885	3.37879	3.03074	47.576	43.653	49.422	22	20	10
Q99613;B5ME19;H3BPE4;H3BPE3;H3BTY8	Eukaryotic translation initiation factor 3 subunit C;Eukaryotic translation initiation factor 3 subunit C-like protein	EIF3C;EIF3CL	29	29	24	22	23	31.9	323.31	3.33457	3.42895	3.10563	74.897	39.674	104.78	18	17	16
O15371;B0QYA5;B0QYA4;B0QYA8;B0QYA6;A0A0D9SGB5	Eukaryotic translation initiation factor 3 subunit D	EIF3D	17	17	13	10	8	39.1	167.12	3.03824	3.35092		31.251	58.125	NaN	5	8	1
P60228;E5RGA2;H0YBR5;H0YAW4;E5RHS5;E5RIT4;E5RII3;E5RIP5;E5RJ25;H0YBP5	Eukaryotic translation initiation factor 3 subunit E	EIF3E	21	21	18	18	12	47.6	323.31	3.24822	3.39684	3.02127	64.27	57.025	72.587	15	16	9
O00303;H0YDT6;E9PQV8;A0A0D9SEZ9	Eukaryotic translation initiation factor 3 subunit F	EIF3F	10	10	9	9	6	33.9	323.31	3.30495	3.46362	3.15531	21.069	16.939	17.35	8	8	2
O75821;K7EL20;K7ER90;K7ENA8;K7EP16;K7EL60;K7ENH0	Eukaryotic translation initiation factor 3 subunit G	EIF3G	15	15	10	11	7	49.4	323.31	3.3553	3.41061	2.80608	86.957	11.574	93.899	6	6	3
B3KS98;O15372;A0A087WZK9;E5RJT0;E5RGU4;E5RFW7;E5RFH0;E5RHC7;E5RH59	Eukaryotic translation initiation factor 3 subunit H	EIF3H	16	16	13	11	6	44.5	106.26	3.26263	3.36387		70.44	63.872	NaN	5	8	0
Q13347;Q5TFK1	Eukaryotic translation initiation factor 3 subunit I	EIF3I	12	12	10	8	8	49.5	202.02	2.99863	3.27989		50.157	11.495	NaN	4	6	1
O75822;H0YGJ7;H0YLP3	Eukaryotic translation initiation factor 3 subunit J	EIF3J	8	8	4	4	4	28.7	20.205	3.25367	3.43683		15.415	20.831	NaN	3	2	0
Q9UBQ5;K7ES31;K7ERF1;K7EQM4;A0A087WVB9;B4DQ48;K7EK53	Eukaryotic translation initiation factor 3 subunit K	EIF3K	6	6	4	4	4	34.4	25.139	3.34483	3.6412	3.13251	32.871	25.322	123.67	2	3	2
B0QY89;Q9Y262;B0QY90;C9JHP4;C9K0Q7;H7C3A0;H0Y7E6	Eukaryotic translation initiation factor 3 subunit L	EIF3L	25	25	22	21	18	39.7	323.31	3.26665	3.37407	3.06867	16.424	90.119	86.569	14	18	10
Q7L2H7;J3KNJ2;E9PN86;H0YCQ8;E9PRY0;E7ESM3	Eukaryotic translation initiation factor 3 subunit M	EIF3M	18	18	13	10	8	47.6	323.31	3.22228	3.47444	3.6774	82.557	126.52	187.95	10	7	2
P60842;J3KT12;J3QS69;J3KTB5;J3QL43;J3KSZ0;J3QR64;J3KTN0;J3QLN6;J3KS25;J3QKZ9;J3QL52;J3KT04;J3KS93;J3QQP0;E7EMV8;E9PBH4;F8WE11;C9JUF0	Eukaryotic initiation factor 4A-I	EIF4A1	25	13	23	21	21	54.2	323.31	3.45246	3.5741	3.48929	109.69	113.05	127.85	23	25	18
Q14240;E7EQG2;J3KSN7	Eukaryotic initiation factor 4A-II;Eukaryotic initiation factor 4A-II, N-terminally processed	EIF4A2	23	11	18	18	16	46.7	224.9	3.58976	3.61506	4.14763	12.764	8.7677	95.79	2	4	2
P06730;D6RBW1;H0Y8J7;D6RFJ3	Eukaryotic translation initiation factor 4E	EIF4E	8	8	6	6	4	40.1	171.69	3.25666	3.36415	3.15186	9.6361	8.7142	84.31	4	6	4
E7EUU4;A0A0A0MR52;C9K073;C9J2Z7;H7C044;H7C0V6;C9JHW9;C9JIH5;C9JWH7;C9J556;REV__F5H7J8;C9JSU8;C9JWW9;REV__Q8NEG2;REV__C9JQZ6;REV__J3KQX6		EIF4G1	69	1	54	46	49	38.3	323.31	3.62831	3.59944	3.76373	96.2	78.191	121.15	31	28	30
A0A0U1RQK7		EIF4G3	53	2	36	28	27	31.7	323.31	3.52895	3.74631	3.62035	48.736	14.22	121.24	15	6	8
Q15717;M0QZR9;M0R055	ELAV-like protein 1	ELAVL1	8	7	6	8	4	33.1	128.49	2.16011	2.68181	1.18098	32.321	13.782	66.907	7	6	4
B4DXZ6;P51114;E9PFF5;E7EU85;C9JAJ4;C9JZE0;C9JY20;C9J5B4;C9IZ22;H7C4S4	Fragile X mental retardation syndrome-related protein 1	FXR1	12	10	3	6	4	23.7	31.312		1.82489	1.76515	NaN	12.884	90.165	1	4	3
Q13283;E5RIZ6;E5RI46;E5RIF8;E5RH42;E5RJU8;E5RH00	Ras GTPase-activating protein-binding protein 1	G3BP1	16	14	12	10	8	38.6	323.31	1.97992	2.51301	1.65535	31.966	55.813	67.747	11	8	6
Q9UN86;D6RAC7;D6RB17;D6RGJ4;D6RBM9;D6REX8;D6RBR0;D6RE13;D6RBW8;D6R9X5;D6R9A4	Ras GTPase-activating protein-binding protein 2	G3BP2	12	10	5	2	7	29.5	121.41	2.52877		1.78476	39.717	NaN	45.924	4	0	3
F8W6I7;P09651;F8VTQ5;F8VZ49;Q32P51;H0YH80;F8W646;F8VYN5	Heterogeneous nuclear ribonucleoprotein A1;Heterogeneous nuclear ribonucleoprotein A1, N-terminally processed;Heterogeneous nuclear ribonucleoprotein A1-like 2	HNRNPA1;HNRNPA1L2	15	15	11	9	11	48.5	304.36	1.55169	2.21357	1.76384	34.17	23.781	98.13	13	10	14
P51991;H7C1J8	Heterogeneous nuclear ribonucleoprotein A3	HNRNPA3	9	9	8	7	6	30.4	221.8	1.52742	2.22543	1.74472	19.104	59.945	42.522	9	7	4
A0A087WUK2;O14979	Heterogeneous nuclear ribonucleoprotein D-like	HNRNPDL	6	5	5	4	2	16.5	19.724	1.89297	2.45017		10.015	4.6081	NaN	3	2	1
P52272;A0A087X0X3;M0R019;M0R2T0;M0R0N3;M0R2I7;M0QYQ7;M0R0Y6;M0QY96;M0QYL3	Heterogeneous nuclear ribonucleoprotein M	HNRNPM	32	17	14	10	13	50.4	281.94	0.427606	1.47654	1.76897	27.99	19.093	89.239	15	9	11
O43390;B4DT28	Heterogeneous nuclear ribonucleoprotein R	HNRNPR	14	9	10	9	8	22.7	40.51	1.59932	2.1932	1.65796	32.567	12.493	18.354	6	5	3
Q9NZI8	Insulin-like growth factor 2 mRNA-binding protein 1	IGF2BP1	22	20	15	12	12	46.1	323.31	1.80261	2.33205	0.879235	29.651	16.373	73.485	17	13	11
O00425;F8WD15	Insulin-like growth factor 2 mRNA-binding protein 3	IGF2BP3	18	16	13	9	6	38.5	92.281	1.99545	2.51263	0.720804	30.597	10.903	15.065	9	6	4
B4DY09;Q12905;X6R6Z1;A0A0A0MRL0	Interleukin enhancer-binding factor 2	ILF2	10	10	9	8	6	29.8	98.138	1.54908	1.8936	0.854155	30.959	54.231	43.05	9	7	4
Q6PKG0;A0A0B4J210;E5RH50;H0YC33;H0YBW1;H0YAN4;H0YC73	La-related protein 1	LARP1	16	14	9	7	4	17.8	205.79	2.80995	3.12287	1.54755	53.497	16.757	81.665	6	4	3
Q71RC2;X6RLN4;Q96J85;Q6P4E2;F8W1I4;F8W1Z5;Q8TBL5;A0A087WTL9;F8VY40;E5RHZ8	La-related protein 4	LARP4	11	11	5	4	3	19.2	113.88	2.70064	3.09454	1.79281	0.90951	19.374	21.99	2	2	2
P11940;E7EQV3;A0A087WTT1;E7ERJ7;Q9H361;H0YBN4;E5RGH3;H0YAP2;E5RJB9;H0YAS6;H0YB75;E5RH24;Q4VXU2;H0YAS7;H0YC10;E5RHG7;H0YAW6;E5RGC4;E5RFD8;Q96DU9	Polyadenylate-binding protein 1;Polyadenylate-binding protein	PABPC1	32	8	28	24	27	44.2	323.31	3.32423	3.56352	3.04035	84.006	63.054	88.146	25	17	21
B1ANR0;Q13310;H0YEQ8;B1ANR1	Polyadenylate-binding protein;Polyadenylate-binding protein 4	PABPC4	32	1	20	20	21	41.5	284.03	3.28268	3.49301	2.94972	67.414	52.103	100.98	9	10	9
Q14671;E9PR38;H0YEH2;Q5T1Z4;Q5T1Z8;H0YDK8;H0YC97;H0YDC5;E9PMX1	Pumilio homolog 1	PUM1	11	7	4	3	3	11.1	37.842	1.73548	2.05078	0.502331	5.891	8.9983	5.775	3	3	2
P38159;H0Y6E7;H3BT71;Q96E39;H3BR27;H3BNC1;H3BUY5;O75526;Q8N7X1	RNA-binding motif protein, X chromosome;RNA-binding motif protein, X chromosome, N-terminally processed;RNA binding motif protein, X-linked-like-1	RBMX;RBMXL1	9	9	4	6	7	26.1	154.86	1.29989	2.1163	2.11902	19.737	20.523	34.271	4	4	3
F8W7C6;A0A087WV22;X1WI28;P27635;H7C123;H7C2C5;Q96L21;H7C2U2;B8A6G2	60S ribosomal protein L10	RPL10	8	7	6	5	4	44.2	125.89	1.19396	1.52251	2.12744	23.682	27.5	65.808	7	5	6
P62906	60S ribosomal protein L10a	RPL10A	10	10	9	9	7	39.6	224.13	1.30118	1.43504	2.22746	47.839	60.576	94.354	9	7	7
P62913;Q5VVC8;Q5VVC9	60S ribosomal protein L11	RPL11	7	7	4	4	4	37.1	255.11	1.18764	1.44382	2.01361	43.537	30.557	100.22	4	5	4
P30050	60S ribosomal protein L12	RPL12	6	6	6	5	4	54.5	323.31	1.15257	1.29866	2.11463	19.302	4.3442	46.468	6	4	5
P26373;J3QSB4;H3BUK8;H3BTH3;J3KS98	60S ribosomal protein L13	RPL13	7	7	5	5	7	34.1	323.31	1.32325	1.70792	2.09278	55.905	81.191	92.02	6	6	7
M0QYS1;P40429;Q8J015;Q6NVV1;M0QZU1;A0A096LPE0	60S ribosomal protein L13a	RPL13A;RPL13a	8	8	3	4	3	28.6	158.19	1.44318	1.6663	2.88858	1.3363	1.6284	63.71	2	2	2
E7EPB3;P50914	60S ribosomal protein L14	RPL14	5	5	4	4	4	41.9	127.15	1.19137	1.42465	1.92243	28.951	10.091	50.224	6	6	8
P61313;E7EQV9;E7ENU7;E7EX53;E7ERA2	60S ribosomal protein L15;Ribosomal protein L15	RPL15	9	9	2	4	7	36.3	93.03	1.42196	1.79971	2.72301	8.0161	10.726	105.49	2	3	7
A0A087WXM6;J3QQT2;J3KRX5;A0A0A6YYL6;P18621;A0A087WY81;J3KRB3;A0A087WWH0;J3QS96;J3QLC8;A0A0A0MRF8;J3KSJ0	60S ribosomal protein L17	RPL17;RPL17-C18orf32	5	5	3	3	3	26	48.684	1.31916	2.0207	2.13678	50.304	27.986	140.62	5	3	4
J3QQ67;Q07020;G3V203;H0YHA7;F8VYV2;F8VUA6;A0A075B7A0;F8VXR6	60S ribosomal protein L18	RPL18	8	8	5	7	7	42.1	261.54	1.52862	1.72557	2.75326	19.617	4.5224	73.763	5	4	5
M0R117;Q02543;M0R3D6;M0R1A7;M0R0P7	60S ribosomal protein L18a	RPL18A	9	9	4	5	7	46.8	222.24	1.25272	1.44446	1.98397	29.504	17.055	93.602	5	5	6
P46778;G3V1B3;M0R181	60S ribosomal protein L21	RPL21	6	6	3	1	2	36.9	88.186	1.19497	1.50696	2.1042	17.26	7.9791	9.7535	4	2	3
K7ERI7;P35268;K7EP65;K7EKS7;K7ELC4;K7EMH1;K7EJT5	60S ribosomal protein L22	RPL22	4	4	3	2	4	42.1	66.029	1.31788	1.49948	1.95237	6.9856	0.58197	125.85	2	2	3
C9JXB8;C9JNW5;P83731	60S ribosomal protein L24	RPL24	6	6	4	4	5	41.3	202.29	1.04306	1.53401	2.13553	19.942	13.166	38.215	5	5	6
P61254;J3QRI7;J3QQQ9;J3QQV1;J3KTJ8;E5RIT6;J3QRC4;J3KSS0;E5RHH1;J3KS10	60S ribosomal protein L26	RPL26;RPL26L1	10	2	4	3	5	48.3	107.25	1.48182	1.99812	1.95524	40.38	52.16	94.918	5	2	7
P61353;K7ELC7;K7EQQ9;K7ERY7	60S ribosomal protein L27	RPL27	6	6	6	4	3	43.4	76.463	1.25332	1.56023	2.14932	41.33	27.624	12.17	3	3	2
P46776;E9PJD9;E9PLL6;E9PLX7	60S ribosomal protein L27a	RPL27A	5	5	3	3	4	34.5	116.89	1.32884	1.50868	1.88468	15.463	7.0834	60.074	3	3	3
H0YKD8;P46779;H0YMF4;H0YLP6	60S ribosomal protein L28	RPL28	8	8	5	8	5	37.1	189.46	1.22799	1.58203	2.22021	35.219	13.966	78.121	5	7	6
P39023;G5E9G0;B5MCW2;H7C422;H7C3M2;F8WCR1;Q92901	60S ribosomal protein L3	RPL3	13	13	8	9	10	28.5	145.13	1.3562	1.69185	2.31513	32.988	7.9859	97.607	7	4	10
E5RI99;P62888;A0A0B4J213;E5RJH3;A0A0C4DH44	60S ribosomal protein L30	RPL30	6	6	6	5	6	58.8	323.31	1.35823	1.45054	2.1115	45.225	68.73	100.62	8	8	9
P18077;F8WBS5;F8WB72;C9K025	60S ribosomal protein L35a	RPL35A	5	5	2	4	4	29.1	57.445	1.12757	1.35502	2.16899	2.0031	50	117.48	2	3	4
P36578;H3BM89;H3BTP7;H3BU31	60S ribosomal protein L4	RPL4	21	21	15	11	16	46.1	231.11	1.39808	1.70576	2.1132	34.225	24.072	102.04	12	11	14
P46777;Q5T7N0	60S ribosomal protein L5	RPL5	12	12	9	9	6	41.1	72.239	1.29566	1.42921	2.11646	45.564	14.892	92.236	7	6	6
P18124;A8MUD9;C9JIJ5;C9JZ88	60S ribosomal protein L7	RPL7	15	15	11	12	14	44.4	89.744	1.41159	1.55385	2.60241	51.334	12.003	111.26	10	6	12
P62424;Q5T8U2;Q5T8U3	60S ribosomal protein L7a	RPL7A	18	18	8	10	15	45.5	323.31	1.33537	1.59913	1.95725	62.674	44.716	91.794	7	6	16
P62917;E9PKZ0;E9PKU4;E9PP36;G3V1A1	60S ribosomal protein L8	RPL8	8	8	3	5	7	22.6	112.35	1.67369	1.61904	1.92649	63.424	57.636	121.06	4	5	7
H0Y9V9;P32969;E7ESE0;D6RAN4;H0Y9R4	60S ribosomal protein L9	RPL9	6	6	5	5	4	22.8	38.444	1.30597	1.6618	2.18438	66.062	19.587	104.05	4	3	5
P05388;F8VWS0;Q8NHW5;F8VU65;F8VPE8;G3V210;F8VQY6;F8VRK7;F8VW21;F8VWV4;F8VS58;F8VZS0;F8W1K8	60S acidic ribosomal protein P0;60S acidic ribosomal protein P0-like	RPLP0;RPLP0P6	11	11	10	7	7	40.7	250.23	1.17805	1.28404	2.25066	48.969	7.943	68.378	10	7	8
P05387;H0YDD8	60S acidic ribosomal protein P2	RPLP2	8	7	6	6	7	92.2	271.88	1.14097	1.22101	1.994	43.603	6.039	82.326	5	5	8
P62280;M0QZC5;M0R1H5;M0R1H6	40S ribosomal protein S11	RPS11	14	14	4	7	7	57.6	64.636	1.483	2.1128	1.94298	51.846	68.585	96.493	4	4	8
P62277;J3KMX5;E9PS50	40S ribosomal protein S13	RPS13	8	8	5	5	6	49.7	230.64	1.25036	1.53122	1.88686	3.6457	35.769	106.07	3	5	5
P62263;H0YB22;E5RH77	40S ribosomal protein S14	RPS14	8	8	8	6	6	39.7	100.72	1.21847	1.65897	1.77825	50.017	69.552	101.96	7	7	7
I3L3P7;P62244;I3L246;H3BN98;H3BV27;H3BT37;I3L303;H3BVC7	40S ribosomal protein S15a	RPS15A	6	6	4	4	5	59	100.39	1.43034	1.73422	1.76388	16.266	6.6599	99.148	4	3	6
P15880;H0YEN5;E9PQD7;I3L404;E9PM36;E9PMM9;E9PPT0;H3BNG3;H0YE27	40S ribosomal protein S2	RPS2	13	13	6	6	8	42.7	182.69	1.571	1.87208	1.98634	22.124	10.856	74.585	8	7	7
P62266;D6RD47;D6RDJ2;D6RIX0;D6R9I7	40S ribosomal protein S23	RPS23	4	4	2	1	3	23.8	78.844	1.72879		2.03005	84.454	NaN	117.85	2	1	4
P62851	40S ribosomal protein S25	RPS25	6	6	5	3	4	38.4	231.32	1.42008	1.56125	1.73751	57.839	13.665	110.93	4	3	4
P61247;D6RG13;D6RAT0;D6RB09;E9PFI5;H0Y9Y4;H0Y8L7;D6R9B6;D6RAS7;D6RED7;D6RI02;D6RGE0	40S ribosomal protein S3a	RPS3A	13	13	7	6	10	51.5	82.826	1.40419	1.64985	2.02421	15.869	7.683	84.903	4	6	8
P62701;C9JEH7;Q8TD47;P22090	40S ribosomal protein S4, X isoform	RPS4X	16	16	9	11	11	56.7	243.19	1.34784	1.62359	2.02084	48.162	60.618	98.009	13	12	10
P62753;A2A3R7;A2A3R5	40S ribosomal protein S6	RPS6	5	5	5	5	5	19.3	276.51	1.35952	1.71286	1.91736	31.754	18.382	103.42	5	3	4
P62081;B5MCP9	40S ribosomal protein S7	RPS7	6	6	4	5	4	23.2	12.453	1.26261	1.43039	1.68576	33.175	9.4851	85.841	4	6	4
P62241;Q5JR95	40S ribosomal protein S8	RPS8	12	12	9	6	9	58.2	323.31	1.37879	1.62424	2.09886	33.743	24.459	67.713	8	5	9
A0A024R4M0;P46781;B5MCT8;C9JM19;F2Z3C0;A8MXK4	40S ribosomal protein S9	RPS9	11	11	5	8	8	41.2	70.075	1.52211	1.93772	1.95732	12.439	8.1902	85.819	4	7	8
Q9Y3I0	tRNA-splicing ligase RtcB homolog	RTCB	16	16	8	6	6	35.2	241.13	1.59965	2.21198	1.32878	26.188	19.102	61.704	4	3	4
J3KTL2;Q07955;J3QQV5;J3KSW7;J3KSR8	Serine/arginine-rich splicing factor 1	SRSF1	11	10	9	7	6	39.1	122.57	1.44408	1.82835	2.04348	28.368	44.78	38.672	9	7	5
P84103;A0A087X2D0	Serine/arginine-rich splicing factor 3	SRSF3	7	6	5	4	5	36	80.977	1.52452	2.1002	2.15075	24.086	31.595	122.95	4	5	3
O60506;F6UXX1	Heterogeneous nuclear ribonucleoprotein Q	SYNCRIP	16	2	10	8	6	28.1	121.72	1.63914	2.08587	0.917852	21.822	35.597	60.361	10	6	5
Q13595;F8WEH2	Transformer-2 protein homolog alpha	TRA2A	3	3	2	2	2	12.1	28.29	1.84	2.61228		1.8259	6.1185	NaN	2	2	1
Q92900	Regulator of nonsense transcripts 1	UPF1	37	37	21	14	8	36.8	304.85	2.33731	2.94007	0.610417	24.094	14.1	78.783	11	8	4
Q14694;H3BQP1;H3BNS8;H3BNA1;J3KT19;H3BQC6	Ubiquitin carboxyl-terminal hydrolase 10	USP10	13	13	8	9	6	20.1	41.044	2.54871	2.95213	2.00105	18.145	23.513	59.287	4	5	5
P67809;A0A087X1S2;H0Y449;C9J5V9;Q9Y2T7	Nuclease-sensitive element-binding protein 1	YBX1	16	10	11	10	6	52.8	323.31	2.4114	2.30728	0.659925	46.829	11.459	88.435	6	2	7
MNV_VPgF123A;MNV_VPg		Vpg	19	19	17	13	14	77.4	323.31	2.20442	2.46634	2.82802	54.673	168.82	89.419	12	8	9
