# Supplementary material for: Noroviruses subvert the core stress granule component G3BP1 to promote viral VPg-dependent translation
Source: eLife. 2019 Aug 12;8:e46681. doi: 10.7554/eLife.46681 (PMC6739877; doi:10.7554/eLife.46681)
Supplement: Supplementary file 4. — (A) List of genes ranked with a positive STARS obtained with the Brie CRISPR screen against MNV CW3. (B) List of genes ranked with a negative STARS obtained with the Brie CRISPR screen against MNV CW3. (C) As in panel A except using the MNV strain CR6. (D) As in panel B except using the MNV strain CR6. (E) Combined STARS ranking for the genes in both MNV CW3 and CR6 data sets. (F) Comparison of genes with positive and negative STARS values in the data sets obtained using MNV CW3 and CR6. (G) Comparison of data from panel A and C with the previous MNV CRISPR screens. (H) Gene ontology overexpression analysis of genes identified in this study as having positive STARS values for both MNV CW3 and CR6. [file elife-46681-supp4.xlsx]

## Sheet: A) STARS Positive CW3
Gene Symbol	Number of perturbations	Ranks of perturbations	Perturbations	Most enriched perturbation	STARS Score	Average Score	p-value	FDR	q-value
Cd300lf	4	1;2;3;4	AGTGCCGATATACCTCAGGC;CATCCTCCAAGCAAAGAGCG;GAGTAGTAGCTAGTCAGCGT;GTTACTGTGAACATTGGCCC	4	17.1961	10.6468	0	0	0
Mettl14	4	8;11;12;13	ATCAACTTACTACTCTCCCA;GCTGGACCTGGGATGATGTA;GTCCAGTGTCTACAAAATGT;CACTGAACTACTTACATGGG	4	15.1486	9.08745	0	0	0
G3bp1	4	5;6;7;15	CCACACCAAGATCCGCCACG;ACACCTGTGCAACATGTCCG;CATCTTCAGGTACCAAGATG;TGCCGGGGCCACATCAGCCG	4	14.9	9.38348	0	0	0
Csnk2b	4	10;14;16;17	GGGGCAGTAGAGTTTCACCA;GAGGCATCGCACAAATGGTG;GGTGGATGAAGACTACATCC;TCTGGACATGATCTTAGACC	4	14.6826	8.80066	0	0	0		MNV-CW3 positive selection STARS ranking FDR<0.05
Smarce1	4	9;22;29;34	CAGCCTGCTGAGGATCCAGA;AGAGTGTGGTACCTGATGTG;ATGAGGTACAGCAGAAAGGT;GAATACGAAGCAGAAAAGGT	4	13.4785	8.21925	0	0	0
Srsf7	4	37;39;57;63	ACAGAAACCAAGGTATATGT;AAAGGGCATTCAGTTACTAT;CTATCAAAACGAGATCTCCG;TCCACAAAGGCGAATCCTGG	4	12.407	7.45367	0	0	0
Sptlc2	4	27;31;36;71	AATCTCGAAGATATCCAAAG;GTTGTGTTTGAAGATTCGAA;TGAGAGCAATCACTTCAGGA;ACAACTATCTTGGATTTGCG	4	12.1993	7.6354	0	0	0
Mettl3	4	49;56;65;72	TCAGGTGATTACCGTAGAGA;TAGGCACGGGACTATCACTA;AGGTAGCAGGGACCATCGCA;CTGAAGTGCAGCTTGCGACA	4	12.175	7.24395	0	0	0
Ppcdc	4	62;66;70;74	CCCTCGATGCCAACACTCTG;CCCACCTCCGCAGGTCAATG;CTTGAGAAGATACTCACCCC;CAGTGACGCTGATGAATGGG	4	12.1274	7.14677	0	0	0
Kmt2d	4	19;23;48;79	AAATGGCTGTTGATCCCATG;GTTCACCATTAATACCCCCA;TCGGGCCGGACTAACATCCG;TGGGGATGGACAGCCCGACG	4	12.0139	7.59826	0	0	0
Rpl10a	4	21;35;80;105	AAGAAGTTGGTCAAGAAGCT;GGCCGTGGATATCCCCCACA;ACGCGACACCCTGTACGAGG;CTGCTTAATCAGAGACTCAG	4	11.5196	7.20636	0	0	0
Usp16	4	30;50;73;135	TGAAAGGACTCAGTAATTTG;AGATGCGGTCCACAAAACTC;TCTTTACTAAGAACCAACGA;GTGGATACCGACTCCACCCA	4	11.083	7.01093	0	0	0
Prpf40a	4	38;40;51;148	GGATAATCCAACGTTCGCAG;ATCTGTGGCATCATTCCATG;TCAAACAAAGGAGTCCCGCT;ACCACACCTACTAATACTGT	4	10.9233	7.11058	0	0	0
Stag2	4	89;98;153;155	CTTACTTTAGCTAATAACTG;ATTTCGACATACAAGCACCC;TGGTTGGACTATGCATGATA;TTTCCTTCCATTCTAGTCGG	4	10.843	6.44619	0	0	0
Wtap	4	78;90;117;156	CAGACTTCAAAGTTATGGCA;GAGCTTAAAAGCAGTCAGGA;AAGCTGTGCAATACGGCCCT;TACTCAGCAAACGATGTGAC	4	10.8319	6.56348	0	0	0
Paxip1	4	55;69;167;170	GCCTTGGTTACGTTCCACGG;AGTCAGTAGTATGTACACAC;TCCTCATAGATGATCAGGCG;GGTCAGAAATACTAGGGACC	4	10.6826	6.5058	0	0	0
Dyrk1a	4	18;28;32;190	TCATTGGCACCACTGAACAG;TCTTGATTGCACTCCGTTTG;TAATAGGAGTACAAACCACC;TCAGCAACCTCTAACTAACC	4	10.4894	7.31235	0	0	0
Ubr4	4	142;154;166;237	CCTCCGACATTCCGTAACTG;CTCAGCTGGATACAACCAGG;CTGAGCATGTCTAACACGAG;GAGCGTGTCATACTGCAAAG	4	10.1054	6.08673	0	0	0
Ppcs	4	94;95;210;239	AACTTCAGTAGCGGGCGACG;ATGCAGATAATCCGCCAAAG;ATAGAAATCTGACACTGCCG;GTTCTTGTACCGAGCGCGCT	4	10.0908	6.15589	0	0	0
Sptlc1	4	41;43;44;240	CCCTCCAACCCACAACATCG;TCCTGCGTACTCTAAGAGAG;AATGTGCCATAGAACCCTCG;TTTGTCGTAGAATCCTCGCA	4	10.0835	6.92478	0	0	0
Rbm25	4	42;110;159;246	TTTCTGAAGAGCACTACCCC;GCTCAGATCGAAATAAGGAT;CATGCAATAATCTGAGAGCA;GAGTGGGTAAGGGATCAATG	4	10.0406	6.28936	0	0	0
Pak1ip1	4	158;195;263;269	TATGTACTTCCCTCCACTTG;ACAGGGAGGCAGTGTGCGAG;AGAACATGGAATCTTATAGA;CAACCAGCACTTAATCAGTG	4	9.88536	5.8193	0	0	0
Tmem30a	4	85;87;172;345	CAACAACATCCGTGAGATCG;TACTTACAAGCAAAGCACTA;GACAGACCAATTGCGCCATG;CAAGCACAAGATGTCACATT	4	9.4531	6.09141	0	0	0
Ash2l	4	58;61;370;373	CAATAACATTGTCAAAACAA;GCTCCGGAGAGGCCGAAAGT;TTACACACCTCGATCATGTA;TGCAATGTGTGCCATCACAG	4	9.31754	5.92669	0	0	0
Wdr82	4	82;127;174;377	TTACCTTATCAAAAGAACGA;AGTATGATAGGACCTGTGAG;ACTTTCCTGGACACAGCAAG;TAGGGCCTCATGCATCTACA	4	9.29901	5.97098	0	0	0
Smarca4	4	76;226;315;393	GAGGTATGTGATGAGCGCGA;GCTGCAGCACCTTCGAACAG;CCCTGTGAAGGTGATCCACG;CAAACGTCAGTCACTACGGG	4	9.2268	5.64314	0	0	0
Srm	4	161;184;369;395	CGTGCCCTGGCTCACCCATG;TCTGCCCGCAGTAAAACCTA;GGTCCAGTGCGAGATTGATG;GCCCAGGTGCTGATCATCGG	4	9.21798	5.55285	0	0	0
Uba52	4	141;220;397;398	TCCGACTACAACATCCAGAA;ATTCGCGGGCAAACAGCTGG;GATCTTCGTGAAGACCCTGA;AGATCCAAGACAAGGAAGGT	4	9.20484	5.50139	0	0	0
Csnk2a1	4	20;25;46;18080	GGCCAGTATGATCTTCCGGA;AGACATTGTAAAAGACCCTG;GGATTATGAATCACATGTGG;AGTTGTTGTTAAAATTCTCA	3	9.1132	6.11332	0	0	0
Rbbp5	4	197;238;310;427	CGATGACTCGGATTTGAACG;AAACTCAATTGATTTAATGG;TCTTAAACATACTGATCTCG;CCTTACCACAAAGAACAGAC	4	9.08266	5.49819	0	0	0
Ppp4c	4	64;93;232;434	TGAGAGTCGCCAGATTACCC;TAGATCTTCTGTGTGCATGG;TGGACAATTCTATGACCTCA;GACAATTGACCGAAAGCAAG	4	9.05441	5.91061	0	0	0
Hdac1	4	128;286;407;465	TGATCCTAGGTACCACCAGA;TAAAGGGAGTTCTCACCCGT;CTTACCGACAGAGCCTCCCG;GCAGCGAGCAACATTCCGGA	4	8.93456	5.37939	0	0	0
Aamp	4	209;235;372;506	AAGACCACTCATGTCCCCTG;ATCACCGAGCCTCCACACGA;GGAGGGCCCGGATGATAGTG;TGGATGTGGAAGGTCCCGAA	4	8.78777	5.36154	0	0	0
Rpl10	4	147;169;507;580	CCTGATCTAGGCTCCAGACA;TATGAGCAACTCTCTTCTGA;CATGGTAAAGAGTTGTGGCA;ACTACTTACCAGGGACACCA	4	8.55066	5.31096	0	0	0
Snrpb2	4	45;53;96;591	TTAAAGACCATGAAGATGAG;CTGAGAAAAAAGGGCATACA;TATAATTTGGAGGATAATCA;CCAAATGCAGCTAATACCCA	4	8.51802	6.22389	0	0	0
Ptbp1	4	121;181;382;604	TGACATGGATGACTCTGGAA;GGTTAACTACTATACATCGG;GCAAGTCCTACTCACCAGCT;CACCTGGTGCAGCACGTCCA	4	8.48022	5.39156	0	0	0
Bccip	4	109;149;331;624	CCTTAATCACACTCCCAATG;TGCTGAACAAATTAAAGAGT;AATGACACCAGCAAGCCTGT;ATCTCAGATAACGATTATGG	4	8.42363	5.47746	0	0	0
Vapa	4	59;75;83;3451	AAACAGTCACAATTGACCCC;TAGTGACTACATCTGTGAAG;GGCCGCACACAGTACCGGCG;TCTTAAATTGCAAAATCCAT	3	8.34444	5.40023	0	0	0
Sbds	4	189;200;602;661	CCAGATCCGACTGACCAATG;TAGGGATATCGCCACCATTG;CCTTCATGGCTCTCTCGATG;ACTGAAATCTGCAAGCAGGT	4	8.32357	5.13478	0	0	0
Gpat4	4	267;411;534;664	GTAGAGCTTTCGGATACCAA;CAGCGACGGCTACTACGCCA;TAGTAGTTCCCACTACCAAG;AAAGGACCTAAGCTTACCGT	4	8.3157	4.97874	0	0	0
Chp1	4	114;196;303;672	CTTCACCAGCCTGGACAAAG;ACAGGCGCGTGATCTGACTG;TCAATGCCTTCTTCTCAGAG;ATTGCGGGACGAAGAGCTCG	4	8.2949	5.40978	0	0	0
Ddx55	4	186;418;431;746	AATGGGGATAACAAAAGCCA;GTGCGTGTGTGGAATACTAT;GCGTCCACATCGATGCACGA;TGCACCAATCACCTGAACTG	4	8.11342	5.0331	0	0	0
Smc3	4	215;279;598;777	AGCTCAATGAAAACCTACGC;AAGAAGAGCGAGGAATTGCG;TCTGCTAAGCGAGAAACGAG;AGTTATTCATTACGATGCCA	4	8.04269	4.98077	7.76e-06	0.000338097	0.000250658
Smarcb1	4	52;138;168;785	GTTCTACATGATCGGCTCCG;TCTTCTTGTCCCGACCCATG;CTGGCGGCGACTAGCCACTG;AGATCATGGATATACCACCC	4	8.02489	5.69519	7.76e-06	0.000330413	0.000250658
Sec62	4	101;125;145;787	TGGCCAGCAGAAATGAGAGT;GGACGCTTTATTTACAACCA;AACCCGATGACCCATCATGT;TGTTTGTAGGAGGAAACTCC	4	8.02047	5.69158	7.76e-06	0.000323071	0.000250658
Dpy30	4	33;86;116;2203	TGGTCCAGGTAGGCACGGGT;CGGGCTCACAGACAGCGTTG;TGAGCCCGTACTCAGAGTGA;AGAAAAGTCATCGAAACAGA	3	7.90848	5.51946	7.76e-06	0.000316047	0.000250658
Ahcy	4	212;347;366;850	TGTGATGATTGCGGGCAAGG;GCGCACCTGACAGAAGCTGT;TGTCAACGATTCTGTCACCA;TGACCCTATCATACCCTCCA	4	7.8867	5.0557	7.76e-06	0.000309323	0.000250658
Wdr18	4	119;131;179;875	AACCTGCTCACCTACCGAGG;AGAGAGCATCTACCTGTGGG;GAGCACCACATATTCTGTGG;GTCCTGCCTGAAGTTTACAG	4	7.83634	5.54908	7.76e-06	0.000302879	0.000250658
Ppa1	4	84;123;126;24951	GGAACAGATTCGCCACATAG;TGAGGGCGAGACCGACTGGA;TGGTGGTTGAGGTTCCACGC;TAGATATTTCTGATGTCGAA	3	7.8008	5.0075	7.76e-06	0.000296697	0.000250658
Snupn	4	103;120;136;1440	TGGGAAAAGAGCCCTTATCG;TTGGATGTGATGTGCTGGCG;AGAAACTCAACAACAGCCAA;ACTTGTATTGACACAGGCGT	3	7.70134	5.45678	7.76e-06	0.000290764	0.000250658
Sf3b2	4	362;442;844;964	TCGTCCTATAGGGAGTCGCG;CACTCCAGGGTCTTACCGCG;GATAGAAAAACCGAAAGCGT;ACTTGCGCTTAAAACACCAG	4	7.66806	4.61979	7.76e-06	0.000285062	0.000250658
Rpl7l1	4	225;259;351;1022	GAGTGTAAGAATGCTGCGCA;CTGGCGACAGCAACGTGACA;CCTTTCCATGCGTATAACGA;AAATCTTCTGAAAAAGAGGA	4	7.56657	5.04615	7.76e-06	0.00027958	0.000250658
Pdcl	4	182;254;408;1039	CAAAAGGTGTGATCAATGAC;GCAGGTGTGGAACTAATGGC;TTTATGAAGATGGCGTCCCA;ACCTCCAGGAGAAAATCAGT	4	7.53791	5.01712	7.76e-06	0.000274305	0.000250658
Rbm22	4	287;594;835;1063	CAGACCGCCGACGTACAGGG;CTGATGGAACACGACCAGTT;TTAGAAGCTTGTCAGCCACG;GACACGTCTGACACAGAATG	4	7.49824	4.54195	7.76e-06	0.000269225	0.000250658
Sdad1	4	124;129;573;1105	TCTGGGGAAGTCATGACCGT;GGTGCGGCCTTCCTACCATG;AGTGACTCAGAATCCGAGGT;CAAGAACAACAAAGTGAACG	4	7.43092	5.06818	7.76e-06	0.00026433	0.000250658
Btf3	4	47;143;394;1129	TCCCATAGGGAACTGCTCGT;TTAGGGGTGAACAACATCTC;TCAGCTGCTTTGTCTCAGCG;CAGTTTCTTATCGTCTGCTG	4	7.3936	5.26328	7.76e-06	0.00025961	0.000250658
Dcaf7	4	432;450;527;1202	GCTTTGTGGTAGGGTACGGG;AGTCACCACTTGTTGCCAGG;GCACGTTGTGTCAATGCTTG;AGACCCATCAGCGCCCACAG	4	7.28475	4.65415	7.76e-06	0.000255056	0.000250658
Cycs	4	333;334;809;1207	TCTTCCGCCCGAACAGACCG;GTTCGGGCGGAAGACAGGCC;CTGGGGAGAGGATACCCTGA;TTCTGTTTAGGCATCACCTG	4	7.27754	4.6054	7.76e-06	0.000250658	0.000250658
Smarcc1	4	206;344;423;1216	TGAGCAAGAAGATCTTACCA;TAAAACACTAGCTGGACTGG;GCTGCAGCAGATGCTACACG;TCAGCTAACACATTGAAGTG	4	7.26464	4.85809	1.55e-05	0.00049282	0.000398306
Nmd3	4	205;743;899;1252	ATAGACCCAAATACCCTACA;AGACCTGCTTTGGAACACCT;TACTGACCTACCTTACTCAG;TAGGTTTCAACATACCTACA	4	7.21395	4.43492	1.55e-05	0.000484606	0.000398306
Trir	4	613;867;1002;1263	TCCTTACGAAGCTGAGCGTG;AAGTTCACACCGCTGGACAC;CCGGGCGCCTCCCGACCCGG;GGGAACGTCACCCGAGAGTG	4	7.19876	4.24551	1.55e-05	0.000476662	0.000398306
Virma	4	100;112;211;3120	ATTATATTACCTTCTACGGG;GATATGAAGTGGTACCTGCG;ATTGTGGGGAAAGACTTGAC;CCTTTATGATCAAGACGAAG	3	7.12952	4.99619	1.55e-05	0.000468973	0.000398306
Mau2	4	270;558;849;1323	GTCCGGGCCTCGATCCGCTG;GGAAGCCAGCCTTACCCGAA;CATTATTCCTGCTCAGCAAG;GTCAGAGCTGTATTGTCAAG	4	7.11813	4.46156	1.55e-05	0.000461529	0.000398306
Kcmf1	4	132;549;934;1344	GAAACATCAACAGAAGTGGT;GATGCAGTGCATATTAACAA;TGTTTGATCTCCGAGCACGA;TTGAGTTACGATGAATCGAG	4	7.09078	4.5044	1.55e-05	0.000454318	0.000398306
Nip7	4	108;188;816;1351	GATCTTCTCAAACATGACCC;ACGACCGAGTGTACTATGTG;GAGACAAGCTCGTGTCGCTG;AGAGAACCTTCAACTCCTAG	4	7.08175	4.79938	1.55e-05	0.000447329	0.000398306
Dynlt1a	13	651;903;1112;3043;3149;3835;3850;6184;6586;8228;10959;34632;63984	TGAGCCAACTCACCAAACTG;ATGGCGCTTTCTATAGCCTA;TAGGCTATAGAAAGCGCCAT;CTGGTAGGCATTACCACCGA;GATGGCGCTTTCTATAGCCT;TGAAGTGAGCAGCATTGTAA;GGAAGACTTCCAGGCCTCCG;GGGAGACCATTTAAATACAT;ACCCCAGGTTACCTCCTCGG;GCTATAGAAAGCGCCATCGG;TTTAAATGGTCTCCCCAGTT;ATCATGCAGAAGAACGGTGC;AGTGAGCAGCATTGTAAAGG	9	7.0379	4.12884	1.55e-05	0.000440551	0.000398306
Nop16	4	201;260;665;1389	GGGACCACACCAAATCCGTG;GTCCCAGGCATGTCGTATGT;GGCTTCCGTACAAGATCCCG;TGTACCGCACATAGTCGATG	4	7.03356	4.7165	1.55e-05	0.000433975	0.000398306
Bbx	4	617;908;1384;1390	AGAACCCTTGACCCCTACCG;TTAGATCCTACTCAGATGGG;TCAATGATCATAATTCCGTG;CATGTACACCATCGAAGCTG	4	7.03231	4.08861	1.55e-05	0.000427593	0.000398306
Pkm	4	231;639;805;1407	TTTCTCTCATGGAACCCATG;GGGCAGAGTCAATGTCCAGG;CTTCCTGACTTCATGCACGT;TGAAATAGCACATGCCTGTG	4	7.0112	4.43967	1.55e-05	0.000421396	0.000398306
Mak16	4	352;532;547;1437	CATCCTAGAACCAAGACTCA;GCAGTGCTACCTGTACATGA;TGAGTAAGAAGGTTGAACGA;CATTTGTGTCTGATAAAGCG	4	6.97455	4.55027	1.55e-05	0.000415376	0.000398306
Rpl24	4	99;288;1365;1466	CTACGCCAGGACCGACGGGA;CAGCGGGTACAAGATCTACC;ATGCACCAGTGATGGCTCGT;ACAGTCCAGTTTATCTGCCG	4	6.93984	4.51415	1.55e-05	0.000409526	0.000398306
Tcte3	7	742;780;1516;1596;3728;4145;13325	GATGACTCAATTGCTGATGT;CCCCGGTGTCTAAGAGAGAA;CCAATTCAAGTGACAAATGA;GAAGCCTAGCATGTTCGAGA;GCAATTGAGTCATCAAACGG;CCTTTCTCTCTTAGACACCG;GGATTGATGCGTTTGGCCGG	6	6.87953	4.18321	1.55e-05	0.000398306	0.000398306
Gm3448	7	742;780;1516;1596;3728;4145;13325	GATGACTCAATTGCTGATGT;CCCCGGTGTCTAAGAGAGAA;CCAATTCAAGTGACAAATGA;GAAGCCTAGCATGTTCGAGA;GCAATTGAGTCATCAAACGG;CCTTTCTCTCTTAGACACCG;GGATTGATGCGTTTGGCCGG	6	6.87953	4.18321	1.55e-05	0.000398306	0.000398306
Pagr1a	4	102;207;360;1538	AAGCAGAGATCCTACCCCGC;TGAAGAGGAGAGATCAGACG;TGTCTCGGCTAGTAAGGCCG;GCGAGCGACGAGCGTGCGGA	4	6.85655	4.99432	2.33e-05	0.000589386	0.000552083
Rpl14	4	252;682;960;1553	GGGTCCATCCACTAAAGCCT;GAAAATTGATGCCAGAGAAA;TGTCCGAAAAGCTTGGGAGA;AGAACAAGGTGTTACCTGTG	4	6.83969	4.31626	2.33e-05	0.000581527	0.000552083
Rpl38	4	77;122;504;1629	ACTTTCTGCTGACAGCCCGG;TGTCAAGATCAAGAAGAACA;GTTACAGCCTCGGAAAATTG;CAGCAGGTACCTTTACACCC	4	6.75669	5.00496	2.33e-05	0.000573875	0.000552083
Rpl7	4	485;1071;1208;1647	TGGAGCCATACATTGCATGG;CCTTTGTCATCAGAATTCGA;TTAAGAAAAAGGTTCCTGCT;GAAGGCAAAGCACTATCACA	4	6.7376	4.04918	2.33e-05	0.000566422	0.000552083
Gm14325	18	307;766;946;1720;2709;3162;3393;3482;4550;6487;12521;12907;12990;13530;16589;40826;49539;52681	GTTCACATGCACGTCATCAT;GTGTTCGCTTATGTATTTGG;CCCTATGACTGTAAACAATG;TTGTAGAGACTCTTCTGAGA;GAGATGACTGCTATGTGCAA;AGGCATCAAATTAAACATAC;CACCATGACTGTAACCAATG;ACCACATTGTTTACAGTCAT;TGACTGTAACCAATGTGGTA;GTGGTAAGGACTTTAGAACA;ATACATAATCGAACACATGC;CAAGCTCAGAACTCCAAACA;ACCACATTGAATAAACTCAG;CATATGAGAGTGGTAGACAA;GAGAGTATAGAATACTGCAA;GGAAAAGCCTTTGTAAGCAG;GACTTCTAGAAGTTTGAAGA;CTGCAAAGGCTTTACCACAT	9	6.73088	4.23093	2.33e-05	0.000559161	0.000552083
Hnrnph1	4	283;752;927;1672	AAATGGGATAACATTGCCGG;AAAGGCTCTAAAGAAACACA;AAAGCGCTGCACTTCATCCG;AGCCACCGTCCCCATATCTG	4	6.71143	4.26205	2.33e-05	0.000552083	0.000552083
Sf3a3	4	177;291;314;1690	CAATTCCGATCACCGCACTC;ATAGAATTCAGCGAACTCGT;ATGTGTGATTCCTTCAGACT;TTTCAACCTATCCAGACCCA	4	6.69283	4.86459	3.1e-05	0.000726909	0.000646141
Sptssa	4	26;258;316;10557	CTGAACACGGTTCGCTCCCA;CCATCACGCAGATTCGATGC;CAGGTACTGGTAGTAGAACC;GTACAGGGCCATCCCCACCA	3	6.60388	4.56399	3.1e-05	0.000717935	0.000646141
Eif6	4	198;355;966;1822	GGTCCACCCAGACTTGGACA;CTGACTCCGTGCAGATACGG;CACAAACGCCTACTGCCTGG;TGTGTCTTCAGTAATCAGGG	4	6.56218	4.41171	3.1e-05	0.000709179	0.000646141
Actr3	4	600;751;1090;1828	ATGACACCGATGGGTCAAAG;TAATAGTGGCCAATTCGCCA;TTTCCAAGGACTGCTCAGGA;ACGGGTACAGTAATAGACAG	4	6.55647	4.09078	3.1e-05	0.000700635	0.000646141
Casp9	4	695;798;954;1838	CTGGCTTCACTCTTGCAAAG;CTTCACGCGCGACATGATCG;GAAGAACGACCTGACTGCCA;GTCACAGACCTTGAGACCCG	4	6.54699	4.10301	3.1e-05	0.000692294	0.000646141
Gm14305	22	307;766;946;1720;2709;3393;3445;3482;4550;5043;6487;12521;12990;13530;14281;18795;19056;28538;31017;37041;37802;52681	GTTCACATGCACGTCATCAT;GTGTTCGCTTATGTATTTGG;CCCTATGACTGTAAACAATG;TTGTAGAGACTCTTCTGAGA;GAGATGACTGCTATGTGCAA;CACCATGACTGTAACCAATG;CCCTATGAATGTAAACAGTG;ACCACATTGTTTACAGTCAT;TGACTGTAACCAATGTGGTA;AAACTTCTCGAAGTCATGGA;GTGGTAAGGACTTTAGAACA;ATACATAATCGAACACATGC;ACCACATTGAATAAACTCAG;CATATGAGAGTGGTAGACAA;CCACACTGTTTACATTCATA;TATGTGTTCGTTTATGGTTT;ACCACACTGTTTACATTCAT;GGAAAAGCCTTTGCAAGTAG;GAGTTCACCACTACTTGCAA;…	11	6.53701	4.04225	3.1e-05	0.000684149	0.000646141
Uchl5	4	296;511;796;1942	TGAACTAGACGGGTTAAGAG;TCTTGTTTCAGGTTGCCGAG;AAAGACACCAGCCAAAGAGG;TAATAATGCTTGTGCCACTC	4	6.45138	4.3249	3.1e-05	0.000676194	0.000646141
Ddx54	4	118;510;1626;1948	CACATGCACCAGACGCCCAG;AAGAATAGGCTGTGCCACTT;TCATCATCCACTACACTCTG;TGTAGCCACAAAGCACCATG	4	6.44602	4.1916	3.1e-05	0.000668422	0.000646141
Eif5b	4	60;396;1007;1958	GAAGAGTCCTGATTCTGATG;TCCGTTCCTACCGTAGACAG;CGTACGACAAAGCGAAACGG;GACTGCCAGACCTAACTCAG	4	6.43712	4.4724	3.1e-05	0.000660826	0.000646141
Rpl3	4	176;327;371;3671	CAGAGAAGGCAACACGGGCA;TTAGGTGCTTACCTGAGTGT;TGTGGAAACTCCCCCAATGG;AAGCGCAGCAGCCGGCATCG	3	6.39513	4.44882	3.1e-05	0.000653401	0.000646141
Sf1	4	54;321;387;9679	GCAGGGTATTGAGACCCCAG;ACGCCAAGATCATGATTCGG;TGAACCAATCTACAACAGCG;CCCTACCATGGCATGCATGG	3	6.3402	4.30742	3.1e-05	0.000646141	0.000646141
Gm3417	8	742;780;1516;1596;3728;4145;13325;75802	GATGACTCAATTGCTGATGT;CCCCGGTGTCTAAGAGAGAA;CCAATTCAAGTGACAAATGA;GAAGCCTAGCATGTTCGAGA;GCAATTGAGTCATCAAACGG;CCTTTCTCTCTTAGACACCG;GGATTGATGCGTTTGGCCGG;TTGTCACTTGAATTGGCAGA	6	6.30068	3.90877	3.88e-05	0.000798801	0.000773307
Pfn1	4	67;137;403;19110	GTCAATGGGCTGACACTTGG;CGAGTCCTTGTAGCCTACGA;CAGTACCGTAATGCTAACGA;TCGACAGCCTTATGGCGGAC	3	6.28751	4.50455	3.88e-05	0.000790118	0.000773307
Tmx2	4	414;425;1792;2136	CAACCCGTGTGACTTTGACT;GCCAGCCATCGAGAAAGCCG;TCAGTGTGCATACTCACTTG;GTCACTGTGGAGCAACATGT	4	6.28597	4.02445	3.88e-05	0.000781622	0.000773307
Rplp0	4	306;521;1561;2222	CAGATCCGCATGTCGCTCCG;GCATATCCCGAATCTCAGTG;ATCAGCTGCACATCACTCTG;ATGATGCGCAAGGCTATCAG	4	6.2174	4.04035	3.88e-05	0.000773307	0.000773307
Nle1	4	234;389;478;2246	GAACCCCGAGTGCCGCTACG;CTGACTGCGTGTGTCCCGTG;CGTGCCAGTGGACATCACGC;GAGATCCCAGAAGCGCACAG	4	6.19873	4.51158	4.65e-05	0.000918201	0.000881102
Atp2b1	4	285;731;992;2250	CAGAAGTTCACCGTCATCAG;CACCGGCCTTACGTGTATCG;AGGAAAAATCCGTGTTACAG;TGTTAGAAATGAAATACCAG	4	6.19564	4.11646	4.65e-05	0.000908636	0.000881102
Dpm2	4	261;329;437;8136	TGATCAAGCTAACGGCGACA;CTTCACCTACTACACCACTT;ACATGCTGGCTGTCAATGAA;ACCGGGACAGACCAAGCAGT	3	6.18216	4.02069	4.65e-05	0.000899269	0.000881102
Rif1	4	700;857;2137;2271	GCACAAAAAGTACATTTGCG;AACCTGAGTTCAAATACAGG;AACGCCGCCTCGAAGACCGT;ATCTATTCCACAGTTCTCCG	4	6.1795	3.73401	4.65e-05	0.000890092	0.000881102
Rsl1d1	4	399;422;440;12069	TCTGTCCAGCTGTAAAAGAG;AAAATGCCTCCCTATGTGTG;ACGATCCGTATTGGTCACAC;GCTTTCAGAAAAATTGCCAG	3	6.17327	3.8853	4.65e-05	0.000881102	0.000881102
Sf3b5	4	107;150;456;51247	GCAGTCCAAGTACATCGGCA;CCACGCCGACACCACCAAGT;GAGGTCGAAGTGGCCCATGT;TGTAGGAGCAGTAGGAGTCG	3	6.12682	4.35724	5.43e-05	0.00101767	0.000951096
Dynlt1f	13	651;903;1112;3043;3149;3835;3850;6184;8228;10959;34632;36580;63984	TGAGCCAACTCACCAAACTG;ATGGCGCTTTCTATAGCCTA;TAGGCTATAGAAAGCGCCAT;CTGGTAGGCATTACCACCGA;GATGGCGCTTTCTATAGCCT;TGAAGTGAGCAGCATTGTAA;GGAAGACTTCCAGGCCTCCG;GGGAGACCATTTAAATACAT;GCTATAGAAAGCGCCATCGG;TTTAAATGGTCTCCCCAGTT;ATCATGCAGAAGAACGGTGC;ACCCGAGGTTACCTCCTCGG;AGTGAGCAGCATTGTAAAGG	7	6.10404	3.76521	5.43e-05	0.000997718	0.000951096
Dynlt1c	13	651;903;1112;3043;3149;3835;3850;6184;8228;10959;34632;36580;63984	TGAGCCAACTCACCAAACTG;ATGGCGCTTTCTATAGCCTA;TAGGCTATAGAAAGCGCCAT;CTGGTAGGCATTACCACCGA;GATGGCGCTTTCTATAGCCT;TGAAGTGAGCAGCATTGTAA;GGAAGACTTCCAGGCCTCCG;GGGAGACCATTTAAATACAT;GCTATAGAAAGCGCCATCGG;TTTAAATGGTCTCCCCAGTT;ATCATGCAGAAGAACGGTGC;ACCCGAGGTTACCTCCTCGG;AGTGAGCAGCATTGTAAAGG	7	6.10404	3.76521	5.43e-05	0.000997718	0.000951096
Ezh2	4	284;590;2197;2397	TATCGTAGTAAGTACCAATG;TTATCAGCAGGAAATTTCCG;AGAGTACATTATAGGCACCG;GACACCACCTAAACGCCCAG	4	6.0857	3.87818	5.43e-05	0.000988031	0.000951096
Ptma	4	295;421;645;2402	CAGCTCCGAGATCACCACCA;AAAGCAAAATGAGGAAAATG;GACACTCACAGCGTTCCCAT;GATTGATTCTCCAGGTGAGG	4	6.08208	4.34307	5.43e-05	0.000978531	0.000951096
Rpl4	4	230;357;476;7694	GTTAGGTCATCGTATTGAGG;AGAAAACAGATGTGTCGTGG;GCAAAATGAGAAACCGACGG;GCTGTATGGCACTTGGCGGA	3	6.071	3.99861	5.43e-05	0.000969212	0.000951096
Ftsj3	4	164;555;686;2420	GGAGAGGCTTGATTGGAACG;TCGCAAGAAGTCCGTAACTG;AAGGCATTGGACATCAGGTA;TTGTGATGAAACAACCACCA	4	6.06911	4.32338	5.43e-05	0.000960068	0.000951096
Noc3l	4	247;453;479;8875	TTTATGCCTGCGGATCAAGG;ATTGTCCCTCTGATGAACGA;AAGCAGAAGAGAAACTAGAG;CGAAGCAGAAAAATCTACCA	3	6.06283	3.89667	5.43e-05	0.000951096	0.000951096
Dffb	4	839;1084;1276;2472	ACATACCTTCAAACCAGGAT;CCTCCGTGCCATCTTCGTAC;GATCCGGGGTTACCTAAGAG;AATGGCAGCTATTTCGACAG	4	6.03218	3.79445	6.21e-05	0.0010769	0.000985639
Gm14308	21	307;766;946;1720;2709;3393;3445;3482;4550;6487;12521;12990;13530;14281;19056;28538;31017;37041;37295;37802;52681	GTTCACATGCACGTCATCAT;GTGTTCGCTTATGTATTTGG;CCCTATGACTGTAAACAATG;TTGTAGAGACTCTTCTGAGA;GAGATGACTGCTATGTGCAA;CACCATGACTGTAACCAATG;CCCTATGAATGTAAACAGTG;ACCACATTGTTTACAGTCAT;TGACTGTAACCAATGTGGTA;GTGGTAAGGACTTTAGAACA;ATACATAATCGAACACATGC;ACCACATTGAATAAACTCAG;CATATGAGAGTGGTAGACAA;CCACACTGTTTACATTCATA;ACCACACTGTTTACATTCAT;GGAAAAGCCTTTGCAAGTAG;GAGTTCACCACTACTTGCAA;AGGCATCAAATTAAACATAA;GACTTCTAGAAGTTTGAAAA;…	9	6.02611	3.80975	6.21e-05	0.00103844	0.000985639
Gm14434	21	307;766;946;1720;2709;3393;3445;3482;4550;6487;12521;12990;13530;14281;19056;28538;31017;37041;37295;37802;52681	GTTCACATGCACGTCATCAT;GTGTTCGCTTATGTATTTGG;CCCTATGACTGTAAACAATG;TTGTAGAGACTCTTCTGAGA;GAGATGACTGCTATGTGCAA;CACCATGACTGTAACCAATG;CCCTATGAATGTAAACAGTG;ACCACATTGTTTACAGTCAT;TGACTGTAACCAATGTGGTA;GTGGTAAGGACTTTAGAACA;ATACATAATCGAACACATGC;ACCACATTGAATAAACTCAG;CATATGAGAGTGGTAGACAA;CCACACTGTTTACATTCATA;ACCACACTGTTTACATTCAT;GGAAAAGCCTTTGCAAGTAG;GAGTTCACCACTACTTGCAA;AGGCATCAAATTAAACATAA;GACTTCTAGAAGTTTGAAAA;…	9	6.02611	3.80975	6.21e-05	0.00103844	0.000985639
Gm4724	21	307;766;946;1720;2709;3393;3445;3482;4550;6487;12521;12990;13530;14281;19056;28538;31017;37041;37295;37802;52681	GTTCACATGCACGTCATCAT;GTGTTCGCTTATGTATTTGG;CCCTATGACTGTAAACAATG;TTGTAGAGACTCTTCTGAGA;GAGATGACTGCTATGTGCAA;CACCATGACTGTAACCAATG;CCCTATGAATGTAAACAGTG;ACCACATTGTTTACAGTCAT;TGACTGTAACCAATGTGGTA;GTGGTAAGGACTTTAGAACA;ATACATAATCGAACACATGC;ACCACATTGAATAAACTCAG;CATATGAGAGTGGTAGACAA;CCACACTGTTTACATTCATA;ACCACACTGTTTACATTCAT;GGAAAAGCCTTTGCAAGTAG;GAGTTCACCACTACTTGCAA;AGGCATCAAATTAAACATAA;GACTTCTAGAAGTTTGAAAA;…	9	6.02611	3.80975	6.21e-05	0.00103844	0.000985639
0610010B08Rik	21	307;766;946;1720;2709;3393;3445;3482;4550;6487;12521;12990;13530;14281;19056;28538;31017;37041;37295;37802;52681	GTTCACATGCACGTCATCAT;GTGTTCGCTTATGTATTTGG;CCCTATGACTGTAAACAATG;TTGTAGAGACTCTTCTGAGA;GAGATGACTGCTATGTGCAA;CACCATGACTGTAACCAATG;CCCTATGAATGTAAACAGTG;ACCACATTGTTTACAGTCAT;TGACTGTAACCAATGTGGTA;GTGGTAAGGACTTTAGAACA;ATACATAATCGAACACATGC;ACCACATTGAATAAACTCAG;CATATGAGAGTGGTAGACAA;CCACACTGTTTACATTCATA;ACCACACTGTTTACATTCAT;GGAAAAGCCTTTGCAAGTAG;GAGTTCACCACTACTTGCAA;AGGCATCAAATTAAACATAA;GACTTCTAGAAGTTTGAAAA;…	9	6.02611	3.80975	6.21e-05	0.00103844	0.000985639
U2af2	4	646;1978;2507;2511	CTCACCAGGCACATAAACAG;GAAGCCGAGATCGAAAGCGC;ATGCAGTACAAGGCCATGCA;CATGGCGGGGAGAACGACTG	4	6.00499	3.46887	6.21e-05	0.00102925	0.000985639
Ino80	4	531;1170;2285;2523	GTGACGTGGAGATTCTTCAG;AGAAAATGAATTGTCTGACA;TGCCCATCAATGCATGAAGG;GGGTTGCGGAATATCCTCAC	4	5.9967	3.62927	6.21e-05	0.00102022	0.000985639
Cmtr1	4	862;864;2427;2554	GCAGGCCTGCCAATTCAGAG;AATCCCTATGAGATGATCCG;ACATGATACGCTCTAATGAG;TCCAATCAGAAAGGTCGACG	4	5.97549	3.61828	6.21e-05	0.00101135	0.000985639
Traf2	4	277;963;1306;2580	AGATAACGCTGCCCGCAGAG;AGTACAAACCTTGTTACTCA;CGGACCAGGCCTTTACATGC;CACAGGTTAAGGGAAACTTG	4	5.95789	3.91173	6.21e-05	0.00100263	0.000985639
Uqcc2	4	165;289;522;11176	CCAGTGGACGAGACCAAACG;GCTCTCGTACATCTGATCAC;CACAGAGCTTAAGGAAACGC;TTCAAACTACTACAAGCACA	3	5.95106	4.0469	6.21e-05	0.000994063	0.000985639
Ptpa	4	412;561;652;2591	TGTGCCATAGTCAATTCGTG;TTCTTGATACGCTGGATAGG;CAATCTTGCAGAGACAACAG;ACAGGTATCTTGAGGTTATG	4	5.9505	4.20892	6.21e-05	0.000985639	0.000985639
Cdkn1a	4	390;457;544;12347	GTGGAACTTTGACTTCGTCA;TGCTCCTGTGCGGAACAGGT;CCACGGGACCGAAGAGACAA;CGCAGCCGTGACGACCTGGG	3	5.8974	3.77366	6.98e-05	0.00109953	0.00107249
Pabpc1	4	151;1255;2522;2672	TATAGGTAATGATGGAGGGT;TGGACGAGCTCAGAAAAAAG;CGTACGCGTAGCCCAAGGAG;GCAAGCCAGTACGCATCATG	4	5.89703	3.69252	6.98e-05	0.00109036	0.00107249
Fam96b	4	256;341;1428;2684	GCTCCGGGTCATTAATGGAG;GATGGAGAGGCCAATAAGCG;CCTCATCTATGAGCGTTCCG;TCCCGGGCGTCGATGCTGTC	4	5.88924	4.09784	6.98e-05	0.00108135	0.00107249
Cdc40	4	572;1379;1617;2696	ACCTGTCGTAGGCCGCACTG;CCTGATGATTATCTAACGAA;AAATGTATGACTATCAAGGC;TGCATGAGAGAGTCCGCGGC	4	5.88149	3.66915	6.98e-05	0.00107249	0.00107249
Ninj1	4	376;428;554;3446	CACTCCTATCTGCAGCACGA;CGGTTCCGCAAACCCCAGCG;TGCCAACAAGAAGAGCGCTG;GGCCAACGCGTCGCAGCTGA	3	5.87372	4.20617	7.76e-05	0.00118197	0.00116305
Sf3b1	4	140;187;1819;2766	AAACCAGTCATACCACCCAA;TATCATTAAGCAACGCCACG;TAATCTTCATCAATCAACAG;ACTCCTCGAACAGATCGAGG	4	5.83696	4.20158	7.76e-05	0.00117243	0.00116305
Rpl32	4	185;330;571;19199	ACCAAGCACATGCTGCCCAG;CCACAATGTCAAGGAGCTGG;GAGGCATTGACAACAGGGTG;TGTGTCTTCAGCGAAACTGG	3	5.83444	3.95331	7.76e-05	0.00116305	0.00116305
Lsg1	4	68;113;586;3280	TAGGTGGGCTACCCTAATGT;AGTTCTTGTGTATACCAAGG;AGTGAACAATGATAGCTACC;AGACTTGATCTCGCTTAGTG	3	5.80073	4.68209	9.31e-05	0.00138459	0.00135239
Ppih	4	302;599;2281;2876	GGAGTCGCCAGTATTTACCG;ACGGCAGAGAACTTTAGGTA;TGTTTCTGTTAGGCAAACAG;CCAAAAACCTCCCTTACCTG	4	5.76922	3.7771	9.31e-05	0.00137369	0.00135239
Rsl24d1	4	468;663;848;2887	AGCTGGCAAGGAGCTCACGG;GCCTCACCTTGCAATCGTTG;GAAGAAGAGAAACCCACGCA;GCTCCGGGCCGATCTACCCG	4	5.76259	4.027	9.31e-05	0.00136295	0.00135239
Rpl26	4	821;842;1795;2906	AACTTCGTCATCCTTCCGAA;ATGCGCCCTCTCACATTCGG;GTTGTTCGCGGACACTACAA;CGAACGAGTCCAGCGAGAGA	4	5.75119	3.67024	9.31e-05	0.00135239	0.00135239
Dynlt1b	13	651;903;1112;3043;3149;3835;6184;6680;8228;10959;26275;34632;63984	TGAGCCAACTCACCAAACTG;ATGGCGCTTTCTATAGCCTA;TAGGCTATAGAAAGCGCCAT;CTGGTAGGCATTACCACCGA;GATGGCGCTTTCTATAGCCT;TGAAGTGAGCAGCATTGTAA;GGGAGACCATTTAAATACAT;ACCCGAGGTTACCTCCTCTG;GCTATAGAAAGCGCCATCGG;TTTAAATGGTCTCCCCAGTT;GGAAGACTTCCAGGCCTCAG;ATCATGCAGAAGAACGGTGC;AGTGAGCAGCATTGTAAAGG	8	5.6912	3.56364	0.00010861	0.00156565	0.00156565
Ttc33	4	552;601;662;12963	TGATTTCATCTCATAAAGGG;TAACAACTGCAGATACAAGG;TGCAGGAGGGCTGTAAACAG;GCGTAACCCACACTCGTGGG	3	5.64227	3.56043	0.000124125	0.00177565	0.00177565
Sf3b3	4	115;208;712;49187	GGCATGGCAGACGAAAACTC;ATGGCGTTTAGGCTAACAGG;GAACACTCTGGTGTATCACG;AAAGCCCGATGCAAATTCCA	3	5.54768	4.05936	0.000155157	0.00220275	0.0021538
Brix1	4	257;374;713;3421	TCCTTTAACAAAGCATAATG;GAATGGTGAACGTAAACACG;CAGAACAAGACACTTAATGC;AAAAACAGGATCTCTATATG	3	5.54586	4.19733	0.000155157	0.00218619	0.0021538
Ldha	4	214;489;727;8453	CAAGCTGGTCATTATCACCG;GTTGCAATCTGGATTCAGCG;GTCATGGAAGACAAACTCAA;GGAGAACATGGCGACTCCAG	3	5.5206	3.7145	0.000155157	0.00216988	0.0021538
Wasf2	4	1028;1113;2289;3366	GAGGAGGCAGAGTCCGACTG;AGGACTGAGATTGTTAAGAG;ACGTAAAATCAAGACACGCA;AGCAAGGGAGTTTACTCGGG	4	5.49592	3.44453	0.000155157	0.0021538	0.0021538
H2-Ke6	4	2299;2354;2658;3405	CAGGACACAACGACAGATGG;TGCGATCAGCGTGCGCCTAG;TTCCAAGCGGATGTGTCTCA;CATTAGTAGCATCATTGGAA	4	5.4759	3.15009	0.000162914	0.00224486	0.00219642
Gm14322	14	307;766;1244;1669;1720;3393;4550;6487;10856;10942;12990;13530;52681;72449	GTTCACATGCACGTCATCAT;GTGTTCGCTTATGTATTTGG;CATCAAATAAAACATACTGG;CCACATTGAATAAACTCAGG;TTGTAGAGACTCTTCTGAGA;CACCATGACTGTAACCAATG;TGACTGTAACCAATGTGGTA;GTGGTAAGGACTTTAGAACA;ATACATAAGCGAACACATGC;GAACTTCACTCAGGAAGAGT;ACCACATTGAATAAACTCAG;CATATGAGAGTGGTAGACAA;CTGCAAAGGCTTTACCACAT;TGTGTTCGCTTATGTATTTG	8	5.45625	3.87042	0.000162914	0.00222848	0.00219642
Cript	4	499;644;770;18253	GAGTTATCACTCCAGACACA;GATGGTGCCCGGAACACCAC;ACCACAGGTGAAAAGAAACT;CTTTGACTTCGAAAAAAGCA	3	5.44597	3.48947	0.000162914	0.00221233	0.00219642
BC005624	4	97;1182;1933;3472	GCGCCGGGCTGACTCGGAGT;CCTTTCCAAATGGCGACAGG;TTTCTGCAGAGACCAACCGG;CTTGCGGAAGAGGCCAAATG	4	5.44205	3.72522	0.000162914	0.00219642	0.00219642
Rpl8	4	383;758;818;72476	GACTGTGGCGTAGTTCCCGG;CAACACACGATCGTACCCTC;GCGCACGTGAAGCACCGTAA;TAGGACATCATTCATGACCC	3	5.36744	3.45419	0.000193946	0.0025961	0.0025961
Nfrkb	4	385;1448;2791;3801	CATCCTTGCCCTATTCAGTG;GGGTGTTACAGGCGTAACTG;ATATCCGTGGTGGAAAGCGT;AGGACTACCCCAGGTTCGGG	4	5.28478	3.37563	0.000217219	0.00288701	0.00288701
Rpl35a	4	192;298;878;27405	TTGTCTTAGGCTGTGGTGCA;GATGAAACGGAGTTCTACTT;ACCAGCAATACAGTGACTCC;AACAAAACCAGAGTGATCTG	3	5.27555	3.7911	0.000232735	0.00307145	0.00307145
Spout1	4	204;386;906;17295	TGAGATTGTGGTGTTCGATG;ACGGCCTTACACTCTGAGTG;CATGGCTCTTTGGTCAACTG;GGAGCGGCAGCGTGCCCAAG	3	5.2348	3.69421	0.000248251	0.0032533	0.0032533
Bop1	4	157;297;1458;3951	TGGCACGTTGAAGCTCTGGG;GTGGGCACAGATACAAATCG;AATTCATCGTACCATGCCAG;CAGGTCATAGAAGCTAGGGG	4	5.21754	4.00575	0.000263766	0.00343262	0.00340895
Naca	4	130;312;1398;3952	CACCTACCTGTCTCAGCCTG;ACACACCTGGGCTTGCTGCG;GGGTCTTCGACAGGTTACAG;TGAGTCAGTACCAGAGCTCG	4	5.2171	4.02896	0.000263766	0.00340895	0.00340895
Gm6710	19	766;946;1720;2709;3393;3482;4550;5568;6487;12521;12990;13530;14875;28538;37041;37295;37802;43850;52681	GTGTTCGCTTATGTATTTGG;CCCTATGACTGTAAACAATG;TTGTAGAGACTCTTCTGAGA;GAGATGACTGCTATGTGCAA;CACCATGACTGTAACCAATG;ACCACATTGTTTACAGTCAT;TGACTGTAACCAATGTGGTA;GAGGTCACCACTACTTGCAA;GTGGTAAGGACTTTAGAACA;ATACATAATCGAACACATGC;ACCACATTGAATAAACTCAG;CATATGAGAGTGGTAGACAA;CAGTAATCTATACTCTCCAA;GGAAAAGCCTTTGCAAGTAG;AGGCATCAAATTAAACATAA;GACTTCTAGAAGTTTGAAAA;TATGTGTTCGCTCATGTTTG;GAGATGACTGCATTCTGAAA;CTGCAAAGGCTTTACCACAT	9	5.2049	3.15997	0.000271524	0.00346147	0.00346147
Gm14391	19	766;946;1720;2709;3393;3482;4550;5568;6487;12521;12990;13530;14875;28538;37041;37295;37802;43850;52681	GTGTTCGCTTATGTATTTGG;CCCTATGACTGTAAACAATG;TTGTAGAGACTCTTCTGAGA;GAGATGACTGCTATGTGCAA;CACCATGACTGTAACCAATG;ACCACATTGTTTACAGTCAT;TGACTGTAACCAATGTGGTA;GAGGTCACCACTACTTGCAA;GTGGTAAGGACTTTAGAACA;ATACATAATCGAACACATGC;ACCACATTGAATAAACTCAG;CATATGAGAGTGGTAGACAA;CAGTAATCTATACTCTCCAA;GGAAAAGCCTTTGCAAGTAG;AGGCATCAAATTAAACATAA;GACTTCTAGAAGTTTGAAAA;TATGTGTTCGCTCATGTTTG;GAGATGACTGCATTCTGAAA;CTGCAAAGGCTTTACCACAT	9	5.2049	3.15997	0.000271524	0.00346147	0.00346147
Dffa	4	1501;1637;3524;4069	GCCACAAACTTCGTATTGGA;CAGCCGCGATCAGCACGGCG;AGGGGTGAAGTGGAAGAATG;CCTGAGCCAGCTCTGCACAT	4	5.16642	3.1019	0.000318071	0.00402747	0.00394745
Vcpip1	4	1250;1436;2139;4087	GCGTGTCGTGCAAATACAGG;ATTCGAATAACAACTAACGA;TATGGGACGATGTAACACAT;ACTAATTCTAGGTCTACTGG	4	5.15875	3.30736	0.000318071	0.00400044	0.00394745
Sec23b	4	921;1141;1521;4099	AAAAGTGATGAGACCAACCA;GTGTTGGTGGCACAAGTCAG;AATGGCGTTTGGTGCTACGT;GCAACACCAGTGGACCGCAG	4	5.15366	3.4972	0.000318071	0.00397377	0.00394745
Wdr12	4	325;353;968;5291	AGTTCCATGTGTTTGACCAA;AGCGTCTGACCAAAGGACTG;AAAGTCGATAATGACAATTG;AAGGTCCGCAACTTCAGCAG	3	5.1489	3.89599	0.000318071	0.00394745	0.00394745
Zc3h13	4	265;1226;1546;4172	GGGCAACCTTGAGACACATG;CGTCGGGATAACAGGGAACG;TCGGGATGGTCATCGAAAGG;CGAGGATATTCATGTTCGAG	4	5.123	3.60144	0.000341345	0.00420842	0.00420842
Pknox1	4	1883;2057;2180;4233	GAGCCAGGACCGCATCACGT;GCAAGGCCAAGTGGTCACGC;CCAGCATCAGCCCTACAACA;ATTGGGGTCTGAGACTCGAT	4	5.09778	3.16784	0.000349102	0.00427593	0.00427593
Rpl37	4	944;978;1017;25430	AAGTCGACTTGTGGCAAGTG;CACAAGTCGACTTCTGAAGG;CTTACACTTCCTCTTGCGCT;ATTAGATAACTGGAGTGCCA	3	5.08484	3.15951	0.000364618	0.00443698	0.00443698
Cfap20	4	111;133;1038;4978	TCATCTGTACCATGCCCATG;CACATACATCACGTGTCCTG;TCACCCCTATAGGTACGGAA;ATGACAAAAACGTTCGTCGA	3	5.05833	4.22695	0.000380134	0.00459594	0.00459594
Cdc5l	4	593;714;1050;14336	CCGGCCTGACCCGATAGACA;ATGCAGATTTCAGGAAACTG;TTGCCTTTAATAGGTACGAA;AATCATTCTTAGGTGCGGGG	3	5.04342	3.3012	0.000395649	0.00475287	0.00475287
Atxn2l	4	1018;2478;2668;4393	GCACTACTTACTCAGTAACA;GCCACTGCCGAACCAATGGG;TTTCCATAGCAATCCGTAGG;GATGCAGCAGTTCTCGAGGA	4	5.03333	3.11053	0.000403407	0.00481519	0.00481519
Casp3	4	650;688;1081;11375	AGAGCGAGATGACATTCCTT;CGGGGTACGGAGCTGGACTG;AACCTCAGAGAGACATTCAT;CATGCAGAAAGACCATACAT	3	5.00568	3.28629	0.000449954	0.0053368	0.00530323
Ddx39b	4	1302;1392;2023;4469	CCCGCCAAGAAAGACGTCAA;TAAGTACATGCCGAATGTCA;ACTGCCCACACATCGTCGTG;CTCAAAGCCACAGTCAACGA	4	5.00353	3.28898	0.000449954	0.00530323	0.00530323
Srsf3	4	191;268;1114;28971	CTTCTCTTTAGAACACTGTG;CTCCTGCGGTAATCATCTCG;GTAAGAGTGGAACTGTCGAA;TGGACCACTCAGAAGTGTGT	3	4.96668	3.7195	0.000496501	0.00581527	0.00581527
Icmt	4	951;989;1128;4717	GAACTCTATCCAAGAAGACA;TCAGCCCGCACCTGGTAGCG;GTTGGAGCCAGCCGTAAACA;CCAGCCAAAGTGATTCCAAG	3	4.95049	3.5603	0.000527533	0.00614035	0.00614035
Sgf29	4	1318;1567;2479;4662	CCAGGTTTCCCGATCCAGAG;CACAACCGCCAAGACTGATG;TTTGGCCACATAGTCCCCTG;TCAGCTGATCAAGCAAACCC	4	4.93008	3.17856	0.000550806	0.00637167	0.00637167
Stat1	4	637;782;1149;21502	TGTGATGTTAGATAAACAGA;GGATAGACGCCCAGCCACTG;GAAAAGCAAGCGTAATCTCC;TTAATGACGAGCTCGTGGAG	3	4.92657	3.22604	0.000566322	0.00651096	0.00651096
Rpl7a	4	294;794;1153;74361	ACCTCACACCTACCTCAATG;GGAAGCACTGACCTGCTCGG;CGCTGCAGTCTGATGTAGCG;TGAACTGGTTAATGGCAGGA	3	4.92207	3.33022	0.00057408	0.00655991	0.00655991
Cmpk1	4	354;942;1174;36065	ACACGACCAACGGCTTCATG;TCAAGGTTGGAACAAAACCA;AAGAATCCAGACTCACAGTA;GCGCGCGCATTGTCGAGGTG	3	4.89867	3.24692	0.000612869	0.0069607	0.00691877
Gm14326	16	766;946;1720;2709;3393;3482;4550;6487;12521;12990;13530;16589;37041;37295;40826;52681	GTGTTCGCTTATGTATTTGG;CCCTATGACTGTAAACAATG;TTGTAGAGACTCTTCTGAGA;GAGATGACTGCTATGTGCAA;CACCATGACTGTAACCAATG;ACCACATTGTTTACAGTCAT;TGACTGTAACCAATGTGGTA;GTGGTAAGGACTTTAGAACA;ATACATAATCGAACACATGC;ACCACATTGAATAAACTCAG;CATATGAGAGTGGTAGACAA;GAGAGTATAGAATACTGCAA;AGGCATCAAATTAAACATAA;GACTTCTAGAAGTTTGAAAA;GGAAAAGCCTTTGTAAGCAG;CTGCAAAGGCTTTACCACAT	8	4.89803	3.19031	0.000612869	0.00691877	0.00691877
Rhox4f	15	525;932;1229;2102;2693;5949;6546;7079;12050;12948;22882;31319;58000;71189;76112	GGACACCAGTGGCAGTGCCC;ACCAACTACCTACTTCATGA;GACACAGACAGTCTTACCAC;CAGTGCTGGTATCTGGTGTG;GCCAGTTCTCAAGGATGCTG;TTTCTTCCCTCTCCATCCAG;TGCTGTACCCACACTGACTT;CCAGATACCAGCACTGGAAT;CAGACAGTCTTACCACTGGA;GGAGAAGGTGGGCCTGCTGC;TTTGTCCCCTTCCACTGCTG;TCCTTGAGAACTGGCTCCTC;AAGGACAAGGAAAAGTTGAA;CCAGTCCGGAGCCACAGCAG;TGAGGGACTTGTCAAGGACA	8	4.88344	3.18459	0.0006439	0.00722556	0.00722556
Clasrp	4	433;795;1338;13989	GATGTGCACGAACATCAAAG;GTCTCCATCAGCCATGCCGT;TGTAACTACGAGCGGTACAG;CTGACACTTACCGCTTATAG	3	4.72921	3.21029	0.000868877	0.00969212	0.00969212
Tor1a	4	715;2705;5112;5341	GTTGCTTAGGAAACCAGACA;GGCAGAGAGGATCACAGACG;ATCGCGGAGAATATTTACGA;TGTGTGATGTTAGAGGCGTG	4	4.69388	2.83608	0.000969729	0.0107531	0.0107531
Col4a3bp	4	332;392;1378;33159	AGACGCCATTGAACAGCACA;TAATCCGGCCCTCCGAAACG;CCAGTTTCTCACGTAAACTG;GTGAAAAGGTCAGGTTACAC	3	4.69105	3.43871	0.000977487	0.0107754	0.0107754
Gpr21	4	4565;4591;4797;5372	GAACAATGTGAAGTAGGAGT;GTAGAATGATGGTTCAACAG;GCCTTTAACCTATAATACCC;GATATCCGGGTTTACCCCAG	4	4.68383	2.55936	0.00100076	0.0109674	0.0109036
Actr2	4	346;574;1387;8315	GATGGACGTATCATTAAGGT;GGATGACATGAAGCACCTGT;AAGTGAGCTGCGTTCCATGT;GGAGGCTGGATATTGCTGGG	3	4.68262	3.32025	0.00100076	0.0109036	0.0109036
Las1l	4	673;1000;1395;77848	CTGCGGCACTCATTTATATG;TAGGATACATTGTACACGTG;TCTCCGAGTTGTCTACCGTG;TTGTGAATCTTATCTCAGAG	3	4.67517	3.06409	0.00101628	0.0110087	0.0110087
Apaf1	4	482;781;1401;11697	GAAGAAATCATTTGACCCAG;CATCCTGAGAAAAACACGCG;TACAACGCTCTGCTACACGA;GCTTCCACTTAATATTGAGG	3	4.66961	3.18027	0.00103955	0.0111961	0.0111961
Vmac	4	983;1262;5143;5554	CGCTGCGCGTCGGTGCACGG;GGCCTGCAGGCTGCGAACTG;GGTCGCGCCAAGGACCGGTG;GCCACCTCTGCAGATCCGGG	4	4.62595	2.94524	0.00114816	0.0122951	0.0121016
Rhox4c	16	525;774;932;2102;2693;5949;6546;7079;12948;14287;22882;23769;31319;40744;54337;58000	GGACACCAGTGGCAGTGCCC;CAGGCAGTCTTACCACTGGA;ACCAACTACCTACTTCATGA;CAGTGCTGGTATCTGGTGTG;GCCAGTTCTCAAGGATGCTG;TTTCTTCCCTCTCCATCCAG;TGCTGTACCCACACTGACTT;CCAGATACCAGCACTGGAAT;GGAGAAGGTGGGCCTGCTGC;ACTTCATGAGGGACTTGGCA;TTTGTCCCCTTCCACTGCTG;CCACTGCTGCGGCTCCGGAC;TCCTTGAGAACTGGCTCCTC;CGGAGCCGCAGCAGTGGAAG;ACATACAGGTGGGAAGACAC;AAGGACAAGGAAAAGTTGAA	8	4.62284	3.11234	0.00115592	0.0121016	0.0121016
Rhox4d	16	525;932;1229;2102;5009;5949;6546;7079;10721;10991;12050;12948;14287;23332;23769;70080	GGACACCAGTGGCAGTGCCC;ACCAACTACCTACTTCATGA;GACACAGACAGTCTTACCAC;CAGTGCTGGTATCTGGTGTG;TTTGTCCCATTCCACTGCTG;TTTCTTCCCTCTCCATCCAG;TGCTGTACCCACACTGACTT;CCAGATACCAGCACTGGAAT;GCCAGTTCTCAGGGATGCTG;CGGAGCCGCAGCAGTGGAAT;CAGACAGTCTTACCACTGGA;GGAGAAGGTGGGCCTGCTGC;ACTTCATGAGGGACTTGGCA;TCCCTGAGAACTGGCTCCTC;CCACTGCTGCGGCTCCGGAC;AAGGACAAGGAAAATTTGAA	8	4.62284	2.90112	0.00115592	0.0121016	0.0121016
Rhox4b	16	525;932;1229;2102;5009;5949;6546;7079;10721;10991;12050;12948;14287;23332;23769;58000	GGACACCAGTGGCAGTGCCC;ACCAACTACCTACTTCATGA;GACACAGACAGTCTTACCAC;CAGTGCTGGTATCTGGTGTG;TTTGTCCCATTCCACTGCTG;TTTCTTCCCTCTCCATCCAG;TGCTGTACCCACACTGACTT;CCAGATACCAGCACTGGAAT;GCCAGTTCTCAGGGATGCTG;CGGAGCCGCAGCAGTGGAAT;CAGACAGTCTTACCACTGGA;GGAGAAGGTGGGCCTGCTGC;ACTTCATGAGGGACTTGGCA;TCCCTGAGAACTGGCTCCTC;CCACTGCTGCGGCTCCGGAC;AAGGACAAGGAAAAGTTGAA	8	4.62284	2.90112	0.00115592	0.0121016	0.0121016
Rhox4e	16	525;774;932;2102;5009;5949;6546;7079;10721;10991;12948;14287;23332;23769;54337;70080	GGACACCAGTGGCAGTGCCC;CAGGCAGTCTTACCACTGGA;ACCAACTACCTACTTCATGA;CAGTGCTGGTATCTGGTGTG;TTTGTCCCATTCCACTGCTG;TTTCTTCCCTCTCCATCCAG;TGCTGTACCCACACTGACTT;CCAGATACCAGCACTGGAAT;GCCAGTTCTCAGGGATGCTG;CGGAGCCGCAGCAGTGGAAT;GGAGAAGGTGGGCCTGCTGC;ACTTCATGAGGGACTTGGCA;TCCCTGAGAACTGGCTCCTC;CCACTGCTGCGGCTCCGGAC;ACATACAGGTGGGAAGACAC;AAGGACAAGGAAAATTTGAA	8	4.62284	2.96215	0.00115592	0.0121016	0.0121016
Dnajc2	4	1381;3199;3803;5612	TCAGAATCAAGATCATTATG;GAAACTTCGGAACTCGTGCA;CGCATCTACATCTTCAAACG;ACAGAGCCACGAGGGCACAA	4	4.6079	2.80531	0.00117919	0.0122767	0.0122767
Kmt2b	4	1211;3119;4420;5633	GGGCCTGTTAAGCTCAAAGG;GTGAACCCTCTACTCCCCGA;CCGGGGTGTCTTGATAACAC;GACAGCGTTCACATTCCAGG	4	4.60141	2.77443	0.00121022	0.0125301	0.0125301
Sf3a1	4	88;183;1514;41701	CATTATTTACCCTCCCCCGG;GGATACTCAAGTACAGGACA;GCTGGTGGAGCAGTATACCA;GCGACGTACTGACATCTTTG	3	4.56918	3.80877	0.00129556	0.01334	0.0131313
Itch	4	1183;1282;1532;6757	TCCCGCACATAGGCTATCTG;GCCAAGCTCCCCTACCACCT;AAAACATAATTTACTCGTAG;ACAACACTCGGATTACTCAG	3	4.55388	3.22679	0.00130332	0.0133465	0.0131313
Rnf151	4	2062;2546;5399;5790	GAGCTACCTTGACTTGTAGG;GCACAGTGCAACCCTCATTG;GGGTGGACCCACAGCCTAAG;CCTGTGTTCTGTCTGCCATG	4	4.55366	2.68697	0.00130332	0.013274	0.0131313
Gm14296	7	307;766;1720;3162;5483;10942;12990	GTTCACATGCACGTCATCAT;GTGTTCGCTTATGTATTTGG;TTGTAGAGACTCTTCTGAGA;AGGCATCAAATTAAACATAC;ACTATGACTCTCATATGCAA;GAACTTCACTCAGGAAGAGT;ACCACATTGAATAAACTCAG	5	4.55012	3.29307	0.00130332	0.0131313	0.0131313
2210418O10Rik	7	307;766;1720;3162;5483;10942;12990	GTTCACATGCACGTCATCAT;GTGTTCGCTTATGTATTTGG;TTGTAGAGACTCTTCTGAGA;AGGCATCAAATTAAACATAC;ACTATGACTCTCATATGCAA;GAACTTCACTCAGGAAGAGT;ACCACATTGAATAAACTCAG	5	4.55012	3.29307	0.00130332	0.0131313	0.0131313
Dpm1	4	458;529;1545;63830	ATGGAATCAAACACGCCACG;TGATTAATTTGGCAGCCGTG;GAGAAGCCCCTTCTACCTCT;TCTCTGGAACTCGATACAAG	3	4.54294	3.25718	0.00131883	0.0132165	0.0132165
Pycrl	4	335;1460;1591;8744	ACCGGTGTGGATATCTACGT;CGCAATACTCGTGTGTTCGG;GACTACTCACTCCAACCATG;TGAGCACATCATCGTATCTG	3	4.50497	2.99862	0.0014352	0.0143062	0.0143062
Ncl	4	1187;1749;2871;6010	CCTCTCTTTCAACATCACTG;TCCTATGAAAGCCAAGAGTG;AGCCAAAGTCATTCCAACAC;TAAAAATGATCTTGCTGTTG	4	4.48887	3.00846	0.00145847	0.0144613	0.0144613
Rpl9	4	273;866;1640;9924	ACTGCAGATGGTCCTGACGG;CTGTCCTCATCCGAACCCTG;AGGGCTTCCGATACAAGATG;GGACTTCAATCACATCAACG	3	4.46573	3.16386	0.00155157	0.0153033	0.0153033
Cebpz	4	420;2837;4262;6110	CCTTGGTAACCACTAAAACG;AACGCTCCACAAATGAATGG;CAAGTTGTCAAAGTGCACCC;TGGAGGCAAGTGGTACGACA	4	4.46021	2.88224	0.00156708	0.0153755	0.0153755
Plin3	4	1850;2267;5330;6208	GCCAGTGAGTATGCACACCG;GCCATGTCCGAGTCCTCCGG;CATGACTGATTGGACACCGC;CGCACACAGTCCTGACGTGG	4	4.43257	2.6961	0.00164466	0.0160526	0.0160447
Hnrnpf	4	163;199;1931;7715	ACAGGGAAAGCATGGGACAC;TTGTGAGGCAAACTGAACGA;AGAAGGCAGGCAGAGTGGTG;CATGAATTGTGCAGTCGGAG	2	4.4285	3.70689	0.00165242	0.0160447	0.0160447
Puf60	4	497;658;3469;6248	ATGTTTAAGGTTAATACCTG;AGATGGAGCCCACATAGACC;AGACAGGTCTTGATGTACAG;CAAGAGCATTGATATGTCCT	4	4.42141	3.23175	0.00168345	0.0162618	0.0161784
Ptprm	4	5910;5936;6168;6260	CAAAATTGACTGTGTCCGAG;AGAGCCGACACAAACATATG;TAAAAAATAGATCCCATGCG;GTAGTGAAAGTCGATGCAGT	4	4.41807	2.33903	0.00168345	0.0161784	0.0161784
Nubp2	4	1753;2760;3912;6313	AGAGTTGCCAGTAGTACCTG;AAAGCAGTTTGTGTCTGACG;GCCGTGCACCAGTGTGACAA;GCAGGTGGGAATCCTAGATG	4	4.40343	2.75161	0.00174551	0.0166892	0.0166892
Olfr1080	7	995;1031;2654;2673;32636;46154;54763	GCTTGGCGTCTACATTGGTG;AGCAAAGCAACGATATTAAG;AATATTTATGGTGACTACAA;ATGATGACAGTGTAGAGCAG;CCCAAGATTGCCAATCACTG;AACTGTGGGACCAAAAATGT;TCATGTCCCATAAAGTATGT	4	4.39679	2.72897	0.00176103	0.0167521	0.0167521
Nhlrc2	4	607;1143;5834;6368	CCCAAGCGCAACGTCCCACG;GGTGGGTGATGTTGTATCTG;GGTCTCGCTCTCCGCCTACG;AAACAACGCATATCCTCACA	4	4.38836	2.91776	0.00180758	0.0171081	0.0171081
Wdr74	4	245;429;1763;10606	ATGAGTGTTCCCTACGATGA;GGGAGACTGGATCATAGACA;CGTGAGGTACTTTAATGCTG;GAACCTTCAGCGGAAACATG	3	4.37219	3.34996	0.00183085	0.0172413	0.0172413
Ambra1	4	81;275;5871;6476	CCATAACATCTATATTACAG;GGGTATAAATGCGTTCCCAG;AAGCACGGCATCGATTAAGG;TAGAATCTATGCCCCCACCG	4	4.35914	3.43193	0.00192394	0.0180273	0.0180273
Nifk	4	180;217;3649;9452	GGCCCAGATAAACTACTCCA;TCTGCTAATGTCGCCAAACT;AGGCTCTGACGCAGATCCAA;AAGCGCTATAATCGGAAACG	2	4.35349	3.27842	0.00194722	0.0181546	0.0181546
Mettl26	4	2487;3558;6201;6514	TGGCGGAGTACGGACAGGAT;GAATGCCGAGTGGCAGCCGT;CTGTGTTCGCGTGCTCGAGG;AACAGGTCCAGCGATCGGGG	4	4.34898	2.50351	0.00197049	0.0182807	0.0181906
Olfr133	5	648;1264;2176;4426;18343	GTTGCGCTGATTCATTATGA;GAGGAAGTTCCAGCCAAGGA;ACTCTGTACCCCCCATTGTG;AGGCAATTGCAGTGTTACAG;ACATAGGGCTATGGAGACAG	4	4.34619	3.02121	0.00197049	0.0181906	0.0181906
Shoc2	4	2140;2872;4825;6634	ACATACCTATTGTATCTGGG;CATGTTGAGGGAATAAATGG;TAACATTTCTACTCTACCAG;ATTATGTAACCTCATTACCC	4	4.31727	2.63471	0.0020791	0.0190992	0.0190992
Ptges2	4	1665;2313;5118;6699	AGCGGGTGTTCGGTACACGT;AGCTGCAGGCTGTTCGACAG;ATGAAGGCCATGAATGACCA;GCCGGTGCGCCCTGACTGAG	4	4.30033	2.68238	0.00215668	0.0197152	0.0197152
Rpl19	4	692;830;1868;64129	GGAAAAACACCCTGGCCCGA;AAGTGGGAGCTTACATATGG;TCTTGCTCAGGGAAGAGGAA;CAGATCATACTCACGGGAGT	3	4.2974	2.98756	0.00217995	0.0198312	0.0198312
H2-T3	4	1382;1769;1871;50489	CTGGTTATACAGAGCTCCGT;CGTGCGCTTCAACAGCTCAG;GTCAGCAGGGTAGAAGCGCA;CATTGAGGGCAATGTAATCG	3	4.29532	2.67492	0.00219547	0.0198759	0.0198759
Slc4a7	4	106;236;2323;19013	TCAGGAACATAAGGTCCATG;ACAGTATAGGAAAAGAATCG;GCAGATCCATTAGGAAACAC;TCTGCAAAGGATCGAACCAG	2	4.28079	3.52406	0.00225753	0.0203395	0.0203395
Gosr1	4	633;1415;1909;8897	TGGCTTGATCCATTTAATAG;CACAGCGGCTCACGGGATGG;GCTCGTACAGAGTTTACTGA;AGAATCTCATGGGATCAGTA	3	4.26934	2.83849	0.0022808	0.0204508	0.0204508
Ddx56	4	338;367;1939;34238	GAGTTCTCCGTTGAGCACGC;CATCGGAATAGCATAAGCTG;AGAAAAGCCTGGTAAATCCG;CAAGTCAAAGGCAAACGTCG	3	4.24919	3.30785	0.0024282	0.0216688	0.0216688
Tank	4	4237;4567;5465;6942	GCATCACTATAAAGGATGGT;ATAGAGTCATTGTCCATAGG;CTTCTCGTGGATTCTAGTCG;TCTGGAAAAGAATCCGCCAA	4	4.23843	2.41426	0.00249026	0.0221173	0.022013
Rreb1	4	1812;3410;5592;6949	GCGGATGTGACGGATCAGGG;CAGCACAACACAGACACGGG;GGTGTGAGACAAACCTACGG;CCCTACTCTGCTGAAAACGA	4	4.23668	2.54856	0.00249026	0.022013	0.022013
Ddx27	4	1047;1122;1964;47582	GGGTCTGTGACAAGTTGCCG;GTAGATCAGACGCTCCAAGA;GGATCCGGCCTAATAGGGAA;TGAGACTGACTACTCCTCTG	3	4.23264	2.82178	0.00250578	0.0220462	0.0220462
Traf3	4	342;1198;5562;6987	GCTTTGAGATCGAGATTGAG;CAGGTTCACGTGCTGTACCG;GCTGGGGGCATTGACACACT;AGTGACTGCACGTGGCCTCG	4	4.22721	2.94377	0.00253681	0.0222149	0.0222149
Olfr128	5	1023;1256;2187;4761;21031	GAAGTGGCTACATTTCATAT;GCAGCTGTGTGGCTAAGTGG;GGGAACTGTCAACATACTGG;ATTATGACCTCATAGTGCAG;ATAAGACATCACTGTAAGAA	4	4.22138	2.94223	0.00255233	0.0222468	0.0222468
Phf5a	4	451;744;2000;17895	GGCCGCCACAGATTACACAC;CAGGGTGCAGGGACGCACGT;AGTAGGCATCGGAGACTCCG;CTCATCACATATGCGGACCA	3	4.20918	3.05016	0.00261439	0.0226822	0.0226822
Ptar1	4	1653;2558;5113;7191	CTGTAAAACCCAGATGCGAT;GGCGATAGTGAAATCCACTG;ACATCACCAACGCCTTCCGA;GGTTGAGAACAAACTTGGTG	4	4.17722	2.63148	0.00283161	0.0244536	0.0244536
Kdm1a	4	1372;1814;2065;10117	TCTAACAAACAGGATCGAGT;AATTGGAAGCCAATCCCCCA;GCTGGTCCGTCGGCCCTCCG;TCAACTTCGGCATCTACAAG	3	4.16787	2.62632	0.00293246	0.0252084	0.0252084
Ebna1bp2	4	244;272;4823;38075	CTGTAATGTCAGCTACCGGC;ATTTCTGCAAAATAATCGGT;TCTAGCACGACATTGAGACC;GCAGACTAAACAGGCCGCCA	2	4.15787	3.05064	0.00297901	0.0254916	0.0254916
Urb1	4	926;1926;2120;15727	CATGATCAGAAGCTTAGTGG;CCAGATTCGAGAAGTCACCC;TGTTGGGTAAATGGTCCATG;ACTGTAGTATCTGTGAAACT	3	4.13393	2.65253	0.00316519	0.0269617	0.0269617
Olfr761	6	438;627;1256;4761;19076;34865	ACTCTCTATCAGATTCTGTG;CTGTGGATCCAGTGTTGTGA;GCAGCTGTGTGGCTAAGTGG;ATTATGACCTCATAGTGCAG;ACTGGGGAATTGTGACAGAG;AATCCCCATAAAGCAGGCAA	3	4.12599	3.10894	0.0032738	0.0277607	0.0277607
Rad21	4	912;1110;2159;16122	TAATGCCATTACTTTACCTG;GTGGAATAACCGGCTACTGA;ATGCTTCATTACAGTCTGCG;GACAACTCTCGTCCCAAACG	3	4.1104	2.80334	0.00345224	0.0291418	0.0291415
Fam50a	4	483;1548;2163;34220	AGAGCCATCCCAGTAACTAA;TGACATGAAGGCCAAACAGG;CCATGCACCTAATGAAGAAG;AGAGATGGCTATGTACGAGG	3	4.10801	2.79752	0.00346775	0.0291415	0.0291415
Sf3a2	4	171;293;15809;16994	GCAGACATGAAACGGTGGCG;GGAAACCATTGACATCAACA;GCTACCTGGCCCATACCCAA;GCCAAGCCGGGAGATTGACA	2	4.0935	3.08117	0.00360739	0.0301797	0.0301797
Rplp1	4	203;696;2200;66322	CTTACCTTGGCAAACAAGCC;GGGCATTGATCTTATCCTCC;CCTCATCCTGCACGACGACG;GAGGCTCCCAATGTTGACAT	3	4.08612	3.14247	0.00367721	0.0306271	0.0306271
Naa15	4	139;1268;2207;11241	GCCTGGACTAAATACCCCAG;AATGTGTTCCAAGTTTACGA;ATTCAAATGCGAGATCTTGA;GCTTATGAATTGGTTCGCAG	3	4.08202	3.02402	0.00370049	0.0306846	0.0306846
Rpl11	4	678;1315;2213;48834	CTCACCTTTGGAGAACACCG;AATTCAAGAACACATTGACC;CTGCCTCAATATCTGCGTCG;GGGAAAAGGAGAACCCCATG	3	4.07851	2.78603	0.00374703	0.0309337	0.0309337
Nipbl	4	625;1475;2266;7654	GAGCCAAAGCTAACGCCCGA;GGTGAGTCAGAGCGACATCG;CAACAGTCAATAAGCCCGAG;AGGGTAAACTAACCTCCATG	4	4.06882	3.08323	0.00382461	0.0314356	0.0313618
Wrap53	4	1304;6798;6821;7659	GAAGAGTTGGGAACCATCCG;GACACAACCAAGCTAGCCAC;GGTCATTACCACTTACTAGG;AGAAACGAATCTCCCCGAGT	4	4.06768	2.33707	0.00383237	0.0313618	0.0313618
Rpl6	4	104;904;2241;69385	ATCCTCACTGGGCGCCACAG;TTCCGAGGAACATCTTCGGT;GTTGGTGGGGACAAGAACGG;ACAGGGTTTCGGCTGCAATG	3	4.06229	3.15587	0.00385564	0.0314151	0.0314151
Olfr115	6	438;1256;1332;25888;44044;66041	ACTCTCTATCAGATTCTGTG;GCAGCTGTGTGGCTAAGTGG;GAGAATGGCCATCTCATCCC;TGACCTCATAGTGGAGAGGA;ATGAGAGGTCCAGAATAGAA;TAGCAACTCCAATTGTTACA	3	4.05071	2.66663	0.00398752	0.032349	0.032349
Bricd5	4	911;3381;6090;7768	GCCCAACCAAACTACTCTAG;CGGTAACAGATGTAGCCCTG;CCAGAACATGGCAACCATCG;CCGGGATACCCACTATGCCC	4	4.04314	2.5458	0.00405735	0.0327736	0.0327736
Msto1	4	409;716;2284;20053	GGACAGACTACACTTCTATG;GGGCGGGGAGTCCTAACCTG;CTGTTCTGTACAAGACGTCG;AGCCCCCATACCCATCATGG	3	4.03777	3.01795	0.00410389	0.0330073	0.0328662
Lsm12	4	2190;2425;3916;7796	CTAACATTGAGTGAAGCTAG;TTGGGAGCCAGGTGTCGTGC;GACACCAGCGCTGATTGCAT;CCAGAATGTCCCTCTTCCAG	4	4.03688	2.66447	0.00410389	0.0328662	0.0328662
Mdm4	4	4301;4446;4777;7839	CTTGAGCGATGATACTGACG;GTGTCAGAGCAATTAGGTGT;GAGCAACATATGGTATACTG;ACATCAGCTTCTATTAACAC	4	4.02733	2.40844	0.00420475	0.0335306	0.0335306
Srsf11	4	162;1432;5532;7875	GCTGGCGCTCGGAGACACGT;CTTAACAAAGCAGACACGAG;CGAGATCAAGATCTCGCTCG;CGATCTCATTCCCGAGAGAG	4	4.01937	2.93582	0.00429784	0.0341278	0.0339838
Gml	5	379;1861;4385;5364;7990	TGTAGACATAGAGCAGCCGA;GTATTCGACAACACTACTGG;ACATATCCACTATTGTGACA;AGCACCCTAGGGAGTTCTGG;AATAGAAGGTGTTATGCTCC	4	4.01773	2.69239	0.00429784	0.0339838	0.0339838
Khdrbs1	4	274;322;5963;39133	TAGGAGGAAGAGTTGCGCAA;AGAGCATAAGCTTCACACGG;TTCAGGTACTCCGTTCAAGT;AGACGGGGTCAGACGCACCG	2	4.01184	2.89541	0.00434439	0.0342075	0.0341647
Ppp1r10	4	517;518;2341;13323	CAGCCACTTACCTCATCCAA;TGAGCTCTGGAACTTCAACA;GAACTGGACGAAACTGAGCG;GTCGAACCACGCTTCCTGAG	3	4.00597	3.06702	0.00436766	0.0342468	0.0341647
Ttf1	4	337;1789;2343;15610	GCATGTATCGGGATGACCTA;ACCTCCAGAAAGTTGCACCC;GCCTTCTGAGGAGTCCACCA;CCGAGTCATCAAGACTGTCG	3	4.00487	2.77345	0.00437542	0.0341647	0.0341647
Plin4	4	417;775;2352;15448	CCTGGACACTACCAAATCTG;GGGGCTGTGAATGTGGCTAA;TGCCTCCTTAGTTCCGACAA;GCTCATTGGTACGAAGGACA	3	3.99993	2.97986	0.00442196	0.0343849	0.0343849
Rhox4a	19	525;774;932;2102;2693;5949;6546;7079;12948;14287;17589;22882;23769;31319;40744;47866;47924;54337;70080	GGACACCAGTGGCAGTGCCC;CAGGCAGTCTTACCACTGGA;ACCAACTACCTACTTCATGA;CAGTGCTGGTATCTGGTGTG;GCCAGTTCTCAAGGATGCTG;TTTCTTCCCTCTCCATCCAG;TGCTGTACCCACACTGACTT;CCAGATACCAGCACTGGAAT;GGAGAAGGTGGGCCTGCTGC;ACTTCATGAGGGACTTGGCA;ATGAATGATGACGCCTCTGT;TTTGTCCCCTTCCACTGCTG;CCACTGCTGCGGCTCCGGAC;TCCTTGAGAACTGGCTCCTC;CGGAGCCGCAGCAGTGGAAG;AATGAATGATGACGCCTCTG;TGAATGATGACGCCTCTGTG;ACATACAGGTGGGAAGACAC;AAGGACAAGGAAAATTTGAA	8	3.9753	2.77331	0.00457712	0.0354443	0.0354443
Unc93a	6	1296;2017;4077;4228;11797;20749	GGGGAAGCTTGGCAAAGATG;CCTTTGTGTACTCTCCAGAG;CATGAAGGTTGACAGTAATG;GCCCACAAAGTGGATACCCA;AGTAATGTGGACCAAAGAGG;CTTTGTAGAAGCCATCCCAG	4	3.97113	2.42951	0.00460039	0.0354779	0.0354779
Pgk1	4	317;356;2452;46767	TCAAGAACAGAACATCCCTG;GGACTGCACACCGAGCCCAT;CTTCCTCTACATGAAAGCGG;TAAGGTGCTCAACAACATGG	3	3.94624	3.22481	0.00475555	0.0365242	0.0364938
Rpl23	4	304;348;9915;10115	AGCTCCGACCGGAAGACCCA;AATCCGGAATTTCGCCCCGG;CTGTGCAGACAACACAGGTG;GTCCTTAGTACATCCAGCAG	2	3.94468	2.88291	0.00477107	0.0364938	0.0364938
Cebpb	4	242;350;19320;31801	GTAGTCGTCGGCGAAGAGGT;GGCTACCAGGCGACGCCGAG;CGGCTCCGCCTTGAGCGCGG;CTCACGTAACCGTAGTCGGC	2	3.93972	2.92945	0.00479434	0.0365227	0.0365227
Rpl18	4	193;808;2505;19257	TGGCTGACTACTAACCATGC;TTACCTTGACAAGCAGCCGC;TCGCCACAACAAGGACCGAA;TGTGACCGTCCCCACAACCA	3	3.91868	3.05113	0.00493398	0.0374343	0.0374343
Olfr126	7	438;1023;1256;4761;15319;22628;24175	ACTCTCTATCAGATTCTGTG;GAAGTGGCTACATTTCATAT;GCAGCTGTGTGGCTAAGTGG;ATTATGACCTCATAGTGCAG;GAGGGATGAGAGGTCCAGAG;TCCAAAGTAATCATTAGAGC;GATGTCTTATGATCGCTATG	3	3.88986	2.80922	0.00525981	0.0397455	0.0397455
Rplp2	4	243;384;6085;44435	AAGAAAATACTAGACAGCGT;TAGGAGAGGAGTTGCCCCCG;TTCAGCTCACTGATGACCTG;GCTGAATGGAAAGAACATTG	2	3.85957	2.85331	0.00552358	0.041571	0.041571
Tprn	4	1468;1946;2660;11630	CATGGAAACTATCCCAATCG;GGAGCCAACGACCGATTGGT;GCGAGCGATTGACCGCACTG;CGGCGTGCGGACCATTCGAG	3	3.84133	2.48837	0.00567873	0.0425678	0.0425678
Pcyt2	4	1413;1797;2669;23038	GAGGATACGGAACAGGTCAA;GTGTAGGCCGGCGATGACGT;CCGTATGCACACCCACGATG;AGACGGCCGAGACACCTATG	3	3.83698	2.51465	0.00570201	0.0425719	0.0425719
Gemin7	4	202;401;4683;9081	GAGGTAGCGCTCTCGCAGAG;GTGAGTTTCACGCTGCACGA;AGCCTCTGCTGAAGCCATCG;GATGGTCCTACGTCCATCAG	2	3.82213	2.97836	0.00581837	0.0432684	0.0429923
Rpl37rt	2	944;978	AAGTCGACTTGTGGCAAGTG;CACAAGTCGACTTCTGAAGG	2	3.82151	2.72589	0.00581837	0.0430974	0.0429923
Rpl15	4	402;406;21705;62316	CTGGGATACAAGGCTAAGCA;GGCGTTTACGACCACCACGG;GCTGGCGGTATTGCCAACAG;TCAGCTGGTTAACACCATGG	2	3.81142	2.75641	0.00587268	0.0433283	0.0429923
Adam10	4	1345;1760;2726;33773	GGTTTCATCAAGACTCGTGG;CAAACGAGCAGTCTCACATG;CCCATAAATACGGCCCACAG;TATCTGTGGAAACGGGATGG	3	3.80977	2.51823	0.00588819	0.0432725	0.0429923
Ly6c2	6	820;2459;4230;4654;48134;62519	ACTGTGTGCAGGAAGAGGTG;GGCAGAAAGAAAGGCACTGA;CCCTGATTGGCACACCAGCA;TGCAGAATCCATCAGAGGCG;CTGATGTTAGGATCCTTGAT;GCAGAAAGAAAGGCACTGAC	4	3.80928	2.38357	0.00589595	0.0429923	0.0429923
Ly6c1	6	1104;2459;4230;4654;13713;62519	ACTGTGTGCAGAAAGAGGTG;GGCAGAAAGAAAGGCACTGA;CCCTGATTGGCACACCAGCA;TGCAGAATCCATCAGAGGCG;CACAAGAAGAATGAGCACAC;GCAGAAAGAAAGGCACTGAC	4	3.80928	2.35324	0.00589595	0.0429923	0.0429923
Gtpbp4	4	253;410;26320;33487	TGGATTATAAGTATCTGCGC;AATAGTACACATTCGTCCAA;GATGAATATTCTCTATGACA;CAGAAGGAGTGATAGCTCGA	2	3.80295	2.8515	0.00596577	0.0433328	0.0433328
Ptchd4	4	1335;2772;2776;37812	GGTGACCATCACATCAGAGT;TGGAGCAAAATATTGTCCCC;AGACGTAGAATCCTATTACA;ATTACTGTCTGGAACCACAC	3	3.78637	2.38372	0.00611317	0.044232	0.044232
Pgp	4	1925;2310;2785;22224	CAAGACTCGCACGGCCTACG;GCACGGCTAGCCAGTCGCTG;ATGAAACGGCCGTTCTCTAG;AGGCCGTGCCGAACACCTCG	3	3.7822	2.38369	0.00615196	0.0443414	0.0443414
Sbp	5	1867;2928;4997;6170;24283	TCACTCTGGGCTCTGCATGT;GGTCGATACTTCAGTGACAC;GGACTGATGTCTATGGAACC;CTGACCTTCACTACAAACAA;CACTACAAACAAGGGGCGTG	4	3.77929	2.33319	0.00620626	0.0445615	0.0445615
Rpl36al	4	439;1988;2822;30914	GACCCAGTATAAGAAGGGCA;CGCTACGATCGCAAGCAGAG;TCAACGTACCAAAAACCCGA;CCACAAAGAAGATTGTGCTC	3	3.76522	2.62605	0.00640797	0.0458341	0.0458341
Actb	4	368;889;2834;8834	ATGGAGGGGAATACAGCCCG;CAGCACAGGGTGCTCCTCAG;AATGCCTGTGGTACGACCAG;GGACTCCTATGTGGGTGACG	3	3.75976	2.87832	0.00648555	0.0462126	0.0462126
Ddx46	4	609;2689;2842;23884	TCCATGATGTGTCTAAACAT;TCTTCATGGAAATTCCACAC;TGGAGCTTGGAGGACGACGA;AGTCACAAAAGTTGTCACTG	3	3.75613	2.49175	0.00653209	0.046368	0.046368
Mamdc4	4	1285;1322;2856;9350	CAATCTGGGGCCCATACAGG;TCGAAGCCATCGATAGCCTG;AGGGACGTGTAATACCTTGG;CCTGTGTGTGGCATTTCGGG	3	3.74981	2.58575	0.0065864	0.046577	0.046577
Rabl6	4	1429;2676;3022;10657	TGTTTGACATCACTAAGCAG;CCAGTGAAGATTGTGATCCG;TCATGGAAGATTCAGCATAG;TAAGGAAAGTGTAAAAAACG	3	3.67714	2.34783	0.00757164	0.0533431	0.0531977
Brd4	4	278;475;10113;30317	AGCCATGGCTCGAAAACTCC;TTTGGTACCGTGGATACACC;ACTGCAATATCTGCTCAGAG;CCGCCAAGCTGGGTCCTCGG	2	3.67584	2.76769	0.0075794	0.0531977	0.0531977
Rhox4g	16	525;774;932;2102;5949;6546;7079;10721;12948;14287;22882;23332;23769;40744;54337;58000	GGACACCAGTGGCAGTGCCC;CAGGCAGTCTTACCACTGGA;ACCAACTACCTACTTCATGA;CAGTGCTGGTATCTGGTGTG;TTTCTTCCCTCTCCATCCAG;TGCTGTACCCACACTGACTT;CCAGATACCAGCACTGGAAT;GCCAGTTCTCAGGGATGCTG;GGAGAAGGTGGGCCTGCTGC;ACTTCATGAGGGACTTGGCA;TTTGTCCCCTTCCACTGCTG;TCCCTGAGAACTGGCTCCTC;CCACTGCTGCGGCTCCGGAC;CGGAGCCGCAGCAGTGGAAG;ACATACAGGTGGGAAGACAC;AAGGACAAGGAAAAGTTGAA	7	3.66331	2.61974	0.00778886	0.0544639	0.0543695
Rpl37a	4	608;2119;3057;32570	TCCGGAGGGAGGCACCATAG;CACTTGCTCCTTCTGTGGCA;GCCGTCGGCATCTGGCACTG;ACAGGCTAAACGCACCAAGA	3	3.66233	2.52755	0.00780438	0.0543695	0.0543695
Rpl36	4	299;2628;3068;11402	GAGACACAGCCGGCGACGCG;CAAACACACCAAGTTCGTGC;GCGGCTTCGCACCCTACGAG;GACATGATCCGGGAGGTGTG	3	3.65772	2.56664	0.0078742	0.0546528	0.0546528
Rpl13	4	947;2535;3077;49461	GGAACAGGATGAGCTTGGAG;TACCTGCGGATCTTGCGCGC;GGCTGGCATCCACAAGAAAG;CACTGTAGGGCACCTCACGA	3	3.65395	2.41213	0.00792075	0.054773	0.054773
Emc6	4	753;2662;3083;9290	ACAGCGCTGACACTGAGGTC;CCGGCAGTAATCCAGGACCG;TGAAGCCGTAGAGGCCGGTG;AGGGCCGCCGTTCATCAGCG	3	3.65145	2.42974	0.00797505	0.0549458	0.0549458
Vmn2r93	5	736;1036;2306;31207;78512	TTGGAGACAGACAATAGATG;TGACTATGGTCACTCAAGAG;ATGAACAATCAAGGAAACAA;ACTCACAGGATCATCATGGA;ATACCATACACATATTTGGA	3	3.64023	2.59338	0.00817675	0.0561291	0.0560834
Ntmt1	4	1299;2066;3114;61393	CCCGAGCATGCCGTCCACCG;GGTCGACATGGTCGACGTGA;TGACGTGATCTGGATCCAGT;ACTGTGGCGCTGGTATTGGA	3	3.63859	2.42068	0.00820003	0.0560834	0.0560834
Gm13271	17	1363;2716;3448;3651;4317;4856;6663;8664;17432;24289;35804;38130;65325;68344;71675;71815;78934	AACATCACACAGATGACTCT;TAACATCACACAGATGACTC;CACTTGATTCTGGTAAATCT;CTCGTGCCAGGCAGCTCTGC;TTGGACTCTGACGATCTCCC;GAGCTCTGCTAGGAAGCGCG;GAGGTGGAGGACATGCCTGA;GCAGAGCTCCGAAGCGTGCC;CGGAGCTCTGCTAGGAAGCG;GCTGAAGAGGCCAAGAGAGC;TTCCCATGTCCCTGGAAGGA;GCCGGGTCATCAGTGCCTGC;TCAGCATCACCCCTCCCACC;GTGCATCTATTCCTGGTGGG;CTTCCAGGGACATGGGAAAT;GTGAGCTGCAAGTGCTGAAG;GGAAATCGGTCCTGTCCCGC	7	3.63258	2.2016	0.00833191	0.0567782	0.0567782
Olfr1281	4	1049;2878;3144;19948	CAGTTTGGGTGTATTTACTG;TGATCAATATCACTACAAAG;TTAGCTAACAGGAAGTACAT;CTCCAAAGAAATGCACACAG	3	3.62627	2.35321	0.00845604	0.0574153	0.0574153
Gm13547	4	800;1051;3172;19217	GAGAGACATCTGCCAGACGA;AAGAAACATAGTGTCATCAG;TGAAGGAGGAGACCCGAGTG;GACAATCAGTTAGAGCCGAA	3	3.61487	2.67211	0.00872756	0.0590449	0.0589894
Bmyc	4	1097;1497;3176;8247	ATACTTCATGTGCGACGATG;ACGGCGACCGCTTCGCAGGG;GCTGCACCGAGTCATAGTCC;TGGAGAAGCTATCACCGTCG	3	3.61325	2.52674	0.00875083	0.0589894	0.0589894
Gapvd1	4	528;2983;3196;8085	ACATACCGGACACAACACTG;AATACAGTTGCCATACAAGG;AGAAATGGTAGATTCCAATG;GCCTTCCAGAAGATTAACAG	3	3.60519	2.43272	0.00887496	0.0596117	0.0596117

## Sheet: B) STARS Negative CW3
Gene Symbol	Number of perturbations	Ranks of perturbations	Perturbations	Most enriched perturbation	STARS Score	Average Score	p-value	FDR	q-value
N6amt1	4	8;46;73;3941	GGCCCGAGGACCTATCATGG;ACGCCGTTGTACGGGCACGT;CAGGCGGAGTCACTACATAG;CCGCGACGTGTACGAGCCAG	3	8.51165	5.70717	0	0	0
Litaf	4	78;81;163;2113	ACAGGCTGGGTGTAGTACGA;CCAACCTATGAAGAAACAGT;GACAGCACATCTGGACGGGG;GATAACAGACATACTTGCGT	3	7.46555	5.34662	7.76e-06	0.00622566	0.00622566
Nmt1	4	4;253;1150;1828	CAGGCCTACTCACCACACCA;GATCTCGTTACCTCCTGTTG;CAGCGACATGGAATCCACCC;GGGACCCGCCAAAACCATGG	4	6.55647	4.84988	3.1e-05	0.0166018	0.0166018
Rer1	4	175;273;500;3883	AGGTCACAATGTACCAACCC;CAGTGTCACAACCCACCGGA;ACGCAATGAAAAGGTTTAGG;GAAAAATCTGTACACCACCG	3	6.00704	4.36708	6.21e-05	0.0249026	0.0229871		MNV-CW3 negative selection STARS ranking with FDR<0.05
Defa24	7	99;506;1797;3739;4199;6470;8810	CCTGGACCTGGAAGGCCAGC;ACAGCCTGGTCCTCTTCCCC;CCTGCTGGCCTTCCAGGTCC;CCTGGAAGGCCAGCAGGACG;GGATAGGATCAGCCTGGACC;TAAAACTGAGGAGCAGCCAG;CAAAAGAGACAGACACAGCC	6	5.73284	3.87728	9.31e-05	0.0298832	0.0229871
Plscr1	4	9;158;636;14703	CCAGCATATAATCATCCAGG;ACATAACCTACTGGTACCCC;CTCCACTGAACTGTCCACCG;CTGTACCCGAAACTGCTGTG	3	5.69433	4.5559	0.00010861	0.0290531	0.0229871
Hspd1	4	40;1086;1928;3107	TGACTTAGGAAAAGTTGGGG;TCTTGAACTAGGTGTGATGT;AGGGACAATGGACTGAACAC;CGGAGAAGCTCTAAGCACGC	4	5.63501	3.88837	0.000124125	0.0284602	0.0229871
Wdr33	4	232;318;684;53574	GAAAGTCAGCCCATTCCACA;CGGGTTGGTGTACTGTAATG;TGGCCAATCATTAACCCTTG;GAAGAGCTTCAAGTATTCCG	3	5.5998	3.85327	0.000124125	0.0249026	0.0229871
Elob	4	29;198;697;24481	CTTGGCGTCCGTAAAGATGG;CGAACTGAAGCGCATCGTCG;GATGCGCTTCAGTTCGAACA;GCTTCACTAGCCAGACAGCA	3	5.57534	4.28177	0.000139641	0.0249026	0.0229871
Ankrd52	4	375;526;3296;3370	GGAACTGTTAGTTAATAATG;CTACACCATGCAGTACACAG;AATGTCCTTTAACTGCCTAG;GGTCTGTACCTCGTTTCGGG	4	5.49385	3.59461	0.000155157	0.0249026	0.0229871
Ifitm2	4	309;388;754;13340	CACACTCACCTTCACAGAGT;CCAGCAACTCAGCTGTTGTG;AAGATGGTGGGCGATGTGGT;GCTTGGAGGAAGCCCGGCAT	3	5.47324	3.71266	0.000162914	0.0237707	0.0229871
Ints7	4	21;65;2327;4137	CTCAGGCTTAGCTACACCGG;ACTGGGCGATGGAATGCTTG;TTGACTACAAAGCACCAGAA;TGGCGTCCATCATCCCTGAG	2	5.39892	4.38185	0.000186188	0.0249026	0.0229871
Acbd6	4	136;1535;2700;3599	AGCAATGCAGGAATATATCG;TGATATAGAGAACTAACAAC;CATATCACCAGAGTCGTCCC;AGCCATCAAATCGAAAGCTG	4	5.37964	3.50955	0.000186188	0.0229871	0.0229871
Upf1	4	16;84;2095;16428	GGTAAGCATCCTCGTAACGC;GGTATTACAGTAAACCACGC;AGTGACCCACAACTTCCAAG;TGCTCCAAGTAACATCGCTG	2	5.17639	4.14027	0.000310313	0.0355752	0.0355752
Taz	4	1916;2594;2657;4270	AGCAGCTCACCTCGACACAC;TATGAGCTCATTGAGAACCG;TTTGGAGAAGCTTAACCATG;GGTCATCCATGCAAGACTGG	4	5.08266	3.04967	0.000364618	0.0390141	0.0390141
Ttc14	4	156;213;1099;8186	CATCCACCGTCTTTAATGAG;GTGTTGATCTGTTTAGGAAG;GTGGAGGCTTTGGTAGCGCG;TTAATGCCAGCCATGTGTGG	3	4.98426	3.82078	0.000488743	0.0490271	0.0490271
Ilf3	4	229;1397;3201;4665	ACCAAAGAACGAGAACCCGG;AGGGCATTCATAGCTTGAGG;GCAGTAACTTCGAGGCCTCG;CGTCCCTCCGACACGCCAAG	4	4.92897	3.30603	0.000550806	0.0520026	0.0520026
Crkl	4	525;714;1158;35990	GGGCGCCGGTTCGATTAAGG;GGTCCCCGATCTTAAAGCGG;GACACGCGAGTTCTCGGACA;CTTACGTTGAAAAGCTTGTG	3	4.91646	3.27614	0.000589595	0.0525722	0.0525722

## Sheet: C) STARS Positive CR6
Gene Symbol	Number of perturbations	Ranks of perturbations	Perturbations	Most enriched perturbation	STARS Score	Average Score	p-value	FDR	q-value
Cd300lf	4	1;2;3;4	AGTGCCGATATACCTCAGGC;CATCCTCCAAGCAAAGAGCG;GTTACTGTGAACATTGGCCC;GAGTAGTAGCTAGTCAGCGT	4	17.1961	10.6468	0	0	0
Mettl14	4	8;15;22;28	ATCAACTTACTACTCTCCCA;CACTGAACTACTTACATGGG;GTCCAGTGTCTACAAAATGT;GCTGGACCTGGGATGATGTA	4	13.8157	8.48948	0	0	0
Sptlc2	4	10;13;17;40	TGAGAGCAATCACTTCAGGA;AATCTCGAAGATATCCAAAG;GTTGTGTTTGAAGATTCGAA;ACAACTATCTTGGATTTGCG	4	13.1961	8.4254	0	0	0
G3bp1	4	5;6;27;42	ACACCTGTGCAACATGTCCG;CCACACCAAGATCCGCCACG;CATCTTCAGGTACCAAGATG;TGCCGGGGCCACATCAGCCG	4	13.1114	8.49665	0	0	0		MNV-CR6 positive selection STARS ranking FDR<0.05
Csnk2b	4	31;32;41;43	GAGGCATCGCACAAATGGTG;GGGGCAGTAGAGTTTCACCA;GGTGGATGAAGACTACATCC;TCTGGACATGATCTTAGACC	4	13.0705	7.78896	0	0	0
Smarce1	4	9;35;48;56	CAGCCTGCTGAGGATCCAGA;GAATACGAAGCAGAAAAGGT;ATGAGGTACAGCAGAAAGGT;AGAGTGTGGTACCTGATGTG	4	12.6116	7.73765	0	0	0
Stag2	4	26;44;46;74	CTTACTTTAGCTAATAACTG;ATTTCGACATACAAGCACCC;TGGTTGGACTATGCATGATA;TTTCCTTCCATTCTAGTCGG	4	12.1274	7.46568	0	0	0
Tmem30a	4	16;38;45;80	CAACAACATCCGTGAGATCG;GACAGACCAATTGCGCCATG;TACTTACAAGCAAAGCACTA;CAAGCACAAGATGTCACATT	4	11.992	7.52347	0	0	0
Kmt2d	4	21;33;53;105	AAATGGCTGTTGATCCCATG;GTTCACCATTAATACCCCCA;TCGGGCCGGACTAACATCCG;TGGGGATGGACAGCCCGACG	4	11.5196	7.35321	0	0	0
Prpf40a	4	66;72;81;131	GGATAATCCAACGTTCGCAG;TCAAACAAAGGAGTCCCGCT;ATCTGTGGCATCATTCCATG;ACCACACCTACTAATACTGT	4	11.1353	6.82555	0	0	0
Sptlc1	4	18;20;30;141	CCCTCCAACCCACAACATCG;AATGTGCCATAGAACCCTCG;TCCTGCGTACTCTAAGAGAG;TTTGTCGTAGAATCCTCGCA	4	11.0075	7.53594	0	0	0
Dyrk1a	4	7;14;23;193	TCATTGGCACCACTGAACAG;TAATAGGAGTACAAACCACC;TCTTGATTGCACTCCGTTTG;TCAGCAACCTCTAACTAACC	4	10.4621	7.66607	0	0	0
Cdkn1a	4	199;222;244;273	GTGGAACTTTGACTTCGTCA;TGCTCCTGTGCGGAACAGGT;CCACGGGACCGAAGAGACAA;CGCAGCCGTGACGACCTGGG	4	9.85972	5.78432	0	0	0
Snrpb2	4	59;61;243;338	CTGAGAAAAAAGGGCATACA;TTAAAGACCATGAAGATGAG;TATAATTTGGAGGATAATCA;CCAAATGCAGCTAATACCCA	4	9.48871	6.10441	0	0	0
Pagr1a	4	64;67;95;415	AAGCAGAGATCCTACCCCGC;TGTCTCGGCTAGTAAGGCCG;TGAAGAGGAGAGATCAGACG;GCGAGCGACGAGCGTGCGGA	4	9.13218	6.29182	0	0	0
Stat1	4	122;161;285;419	GAAAAGCAAGCGTAATCTCC;GGATAGACGCCCAGCCACTG;TGTGATGTTAGATAAACAGA;TTAATGACGAGCTCGTGGAG	4	9.11552	5.67014	0	0	0
Lsm12	4	137;176;314;423	CTAACATTGAGTGAAGCTAG;GACACCAGCGCTGATTGCAT;CCAGAATGTCCCTCTTCCAG;TTGGGAGCCAGGTGTCGTGC	4	9.09901	5.60266	0	0	0
Mettl3	4	57;103;173;433	TCAGGTGATTACCGTAGAGA;TAGGCACGGGACTATCACTA;CTGAAGTGCAGCTTGCGACA;AGGTAGCAGGGACCATCGCA	4	9.05842	5.99751	0	0	0
Atxn2l	4	149;207;418;453	GATGCAGCAGTTCTCGAGGA;GCCACTGCCGAACCAATGGG;TTTCCATAGCAATCCGTAGG;GCACTACTTACTCAGTAACA	4	8.97998	5.43565	0	0	0
Paxip1	4	24;39;172;454	GCCTTGGTTACGTTCCACGG;AGTCAGTAGTATGTACACAC;GGTCAGAAATACTAGGGACC;TCCTCATAGATGATCAGGCG	4	8.97615	6.28332	0	0	0
Sec62	4	37;50;55;1065	TGGCCAGCAGAAATGAGAGT;AACCCGATGACCCATCATGT;GGACGCTTTATTTACAACCA;TGTTTGTAGGAGGAAACTCC	3	8.88043	6.18337	0	0	0
Wtap	4	76;121;130;593	GAGCTTAAAAGCAGTCAGGA;TACTCAGCAAACGATGTGAC;AAGCTGTGCAATACGGCCCT;CAGACTTCAAAGTTATGGCA	4	8.51215	5.88788	0	0	0
Wdr82	4	34;65;387;621	TAGGGCCTCATGCATCTACA;TTACCTTATCAAAAGAACGA;ACTTTCCTGGACACAGCAAG;AGTATGATAGGACCTGTGAG	4	8.43201	5.73481	0	0	0
Hmgb1	4	374;398;426;638	CTTTGTGCAAACTTGCCGGG;GAAGTGCTCAGAGAGGTGGA;AACCTACATCCCCCCCAAAG;CTCAGAACAGAACAAGAAGA	4	8.38509	5.04033	0	0	0
Trir	4	98;311;525;674	AAGTTCACACCGCTGGACAC;GGGAACGTCACCCGAGAGTG;CCGGGCGCCTCCCGACCCGG;TCCTTACGAAGCTGAGCGTG	4	8.28973	5.14617	0	0	0
Ptma	4	138;148;215;691	AAAGCAAAATGAGGAAAATG;GACACTCACAGCGTTCCCAT;CAGCTCCGAGATCACCACCA;GATTGATTCTCCAGGTGAGG	4	8.24646	5.54952	0	0	0
Papola	4	83;189;609;696	TAAGATGGTACCTATCACTG;ACTTCTAGCAAGTGCGCCCA;CTCCCATTAATCAGGTTGCA;AGTATTACCTACCTTTCGTG	4	8.23394	5.20978	0	0	0
Rhox3f	14	275;389;598;730;791;968;1701;5633;7465;9401;9631;12751;18796;41610	GATACATAGTAATGTGGAAC;CAGAGCGGTGACCGTTGACC;AGATGGAGGACAGGTCGAGT;ACTAAAATGGACAACACCCA;GAAGACAGGAACAAGGAAGA;TGGTAATCCTGAGGTAGTTC;GCAAGAAATGAGGAAGATGG;TGTAGAGGAAGACAGGAACA;TCTATTACCGGAACTACCTC;GAAGCTCTGTGGTAATCCTG;GACAGGAACAAGGAAGATGG;AAGGCCTGCAGTGCCAGCAG;TGGAAGAGATTTCTTCCAGC;AGAAATCTCTTCCAGGTCAA	7	8.22281	5.35279	0	0	0
Rhox4a	19	417;659;1496;1640;1645;2340;2846;3358;3449;4018;5439;12976;15729;18197;35801;38418;38614;54191;59890	TCCTTGAGAACTGGCTCCTC;GCCAGTTCTCAAGGATGCTG;CGGAGCCGCAGCAGTGGAAG;GGACACCAGTGGCAGTGCCC;CAGGCAGTCTTACCACTGGA;TTTCTTCCCTCTCCATCCAG;ATGAATGATGACGCCTCTGT;CAGTGCTGGTATCTGGTGTG;ACTTCATGAGGGACTTGGCA;CCACTGCTGCGGCTCCGGAC;GGAGAAGGTGGGCCTGCTGC;AAGGACAAGGAAAATTTGAA;ACATACAGGTGGGAAGACAC;CCAGATACCAGCACTGGAAT;ACCAACTACCTACTTCATGA;AATGAATGATGACGCCTCTG;TGCTGTACCCACACTGACTT;TTTGTCCCCTTCCACTGCTG;TGAATGATGACGCCTCTGTG	10	8.20763	4.90008	0	0	0
Sec61b	4	79;100;152;754	CAGCCGGGTCCAACGCCCAG;AGTGGATCCCGCAGCCCGTG;TGGCCGCTCTCCCAGCAAAG;CACTTACCTCTGCCGAACAG	4	8.09489	5.76981	0	0	0
Rhox4c	16	417;659;1496;1640;1645;2340;3358;3449;4018;5439;15729;18197;29332;35801;38614;54191	TCCTTGAGAACTGGCTCCTC;GCCAGTTCTCAAGGATGCTG;CGGAGCCGCAGCAGTGGAAG;GGACACCAGTGGCAGTGCCC;CAGGCAGTCTTACCACTGGA;TTTCTTCCCTCTCCATCCAG;CAGTGCTGGTATCTGGTGTG;ACTTCATGAGGGACTTGGCA;CCACTGCTGCGGCTCCGGAC;GGAGAAGGTGGGCCTGCTGC;ACATACAGGTGGGAAGACAC;CCAGATACCAGCACTGGAAT;AAGGACAAGGAAAAGTTGAA;ACCAACTACCTACTTCATGA;TGCTGTACCCACACTGACTT;TTTGTCCCCTTCCACTGCTG	10	7.93656	4.80747	7.76e-06	0.000461716	0.000397589
Uchl5	4	118;147;332;844	TGAACTAGACGGGTTAAGAG;TCTTGTTTCAGGTTGCCGAG;AAAGACACCAGCCAAAGAGG;TAATAATGCTTGTGCCACTC	4	7.899	5.33968	7.76e-06	0.000447287	0.000397589
Rpl10a	4	87;111;117;6410	AAGAAGTTGGTCAAGAAGCT;GGCCGTGGATATCCCCCACA;ACGCGACACCCTGTACGAGG;CTGCTTAATCAGAGACTCAG	3	7.8973	4.89244	7.76e-06	0.000433733	0.000397589
Gnb2	4	151;258;439;983	ACAGGCCACAAAGTTCCCTG;GGACGCCAGAAAAGCATGCG;CTATAGTCTCAAGACCCGAG;AGAACACGGAGGACCCTCCG	4	7.63416	5.03413	7.76e-06	0.000420976	0.000397589
Gm8300	9	266;396;615;988;2194;2671;4053;11708;19309	TGAATCAGAGAAAAGAGAGT;ATGTTCTGGAAGTTCTCCAT;GGAAGTTGAGAAAAAAGGTT;AATGCTGGGATGTGGACGGT;GGAGGCTGTGCCACATAAGA;AAGGCAAAGGAGGCAAAAAC;ATATGGGCAAGAGTATGCCC;GAAATCGTGTTTGATGATAT;TGTGTCCATTTCATTGATTT	7	7.54229	4.97719	7.76e-06	0.000408949	0.000397589
Dpy30	4	36;94;183;2168	TGGTCCAGGTAGGCACGGGT;CGGGCTCACAGACAGCGTTG;TGAGCCCGTACTCAGAGTGA;AGAAAAGTCATCGAAACAGA	3	7.31487	5.34928	7.76e-06	0.000397589	0.000397589
Ezh2	4	182;310;480;1227	TATCGTAGTAAGTACCAATG;AGAGTACATTATAGGCACCG;GACACCACCTAAACGCCCAG;TTATCAGCAGGAAATTTCCG	4	7.24899	4.84894	1.55e-05	0.000773686	0.00066573
Bbx	4	312;675;769;1271	TTAGATCCTACTCAGATGGG;TCAATGATCATAATTCCGTG;AGAACCCTTGACCCCTACCG;CATGTACACCATCGAAGCTG	4	7.18779	4.45456	1.55e-05	0.000753326	0.00066573
Nfrkb	4	68;428;803;1301	CATCCTTGCCCTATTCAGTG;AGGACTACCCCAGGTTCGGG;GGGTGTTACAGGCGTAACTG;ATATCCGTGGTGGAAAGCGT	4	7.14726	4.69305	1.55e-05	0.00073401	0.00066573
Nufip2	4	113;263;879;1379	GGATAACCGACTTGAAGACT;AACTGGGGGTGGCTTAAACA;GCTAGGCGCAATAGTGCCAA;GGACCTGGAGGAACAAGTCG	4	7.04612	4.68875	1.55e-05	0.00071566	0.00066573
Rbm25	4	71;104;228;33696	GCTCAGATCGAAATAAGGAT;TTTCTGAAGAGCACTACCCC;GAGTGGGTAAGGGATCAATG;CATGCAATAATCTGAGAGCA	3	7.02866	4.8229	1.55e-05	0.000698205	0.00066573
Nkx1-1	4	797;843;1319;1414	GCTCCGGGCGAGTTCCCACG;ACAGCTCGGGACACTATGGA;CAGGGCCCAGTAGCACGCAG;CGGCGTTCTAGCTCTGCGCG	4	7.00257	4.08565	1.55e-05	0.000681581	0.00066573
Sf1	4	106;217;459;1523	TGAACCAATCTACAACAGCG;ACGCCAAGATCATGATTCGG;GCAGGGTATTGAGACCCCAG;CCCTACCATGGCATGCATGG	4	6.87357	4.9052	1.55e-05	0.00066573	0.00066573
Hdac1	4	142;1010;1323;1626	TGATCCTAGGTACCACCAGA;CTTACCGACAGAGCCTCCCG;GCAGCGAGCAACATTCCGGA;TAAAGGGAGTTCTCACCCGT	4	6.75989	4.16981	2.33e-05	0.0009759	0.0009759
Krtap4-8	8	1155;1516;1991;2414;2929;4820;6725;65530	GCTGCCAGACCACCTGCTGT;AGCTGGACACACAACAGCTG;CAGCTGGAGATGCAGCAAGA;TGGACACACAGCAGCTAGGG;CTGTGGCTCTGTCTGCTCTG;AGCTGGAAATGCAGCAGCTG;CAGCTGGAAATGCAGCAGCT;CAGCTGGGGCGACAGCAGGT	7	6.64903	4.06501	3.1e-05	0.00127228	0.00119277
Gm5662	10	266;396;615;988;2194;2671;11708;13128;19309;29292	TGAATCAGAGAAAAGAGAGT;ATGTTCTGGAAGTTCTCCAT;GGAAGTTGAGAAAAAAGGTT;AATGCTGGGATGTGGACGGT;GGAGGCTGTGCCACATAAGA;AAGGCAAAGGAGGCAAAAAC;GAAATCGTGTTTGATGATAT;ATATGGGCAAGAGTATGCTC;TGTGTCCATTTCATTGATTT;TGCTCAGGTGACCAAAATGC	6	6.58356	4.35317	3.1e-05	0.00124463	0.00119277
Cfap20	4	52;297;331;35131	TCATCTGTACCATGCCCATG;CACATACATCACGTGTCCTG;TCACCCCTATAGGTACGGAA;ATGACAAAAACGTTCGTCGA	3	6.54354	4.40306	3.1e-05	0.00121814	0.00119277
Ptbp1	4	102;351;359;3492	TGACATGGATGACTCTGGAA;CACCTGGTGCAGCACGTCCA;GGTTAACTACTATACATCGG;GCAAGTCCTACTCACCAGCT	3	6.4379	4.52483	3.1e-05	0.00119277	0.00119277
Dcaf7	4	124;336;403;5326	GCTTTGTGGTAGGGTACGGG;AGACCCATCAGCGCCCACAG;AGTCACCACTTGTTGCCAGG;GCACGTTGTGTCAATGCTTG	3	6.28751	4.29224	3.88e-05	0.00146053	0.00140325
Shoc2	4	427;1048;2190;2210	CATGTTGAGGGAATAAATGG;ACATACCTATTGTATCTGGG;TAACATTTCTACTCTACCAG;ATTATGTAACCTCATTACCC	4	6.2268	3.74731	3.88e-05	0.00143132	0.00140325
Clasrp	4	123;461;1329;2235	TGTAACTACGAGCGGTACAG;GTCTCCATCAGCCATGCCGT;CTGACACTTACCGCTTATAG;GATGTGCACGAACATCAAAG	4	6.20726	4.21451	3.88e-05	0.00140325	0.00140325
Rhox3c	14	275;389;791;968;1701;2381;4590;5633;7465;9401;9631;12751;17483;41610	GATACATAGTAATGTGGAAC;CAGAGCGGTGACCGTTGACC;GAAGACAGGAACAAGGAAGA;TGGTAATCCTGAGGTAGTTC;GCAAGAAATGAGGAAGATGG;ACTAAAATGGACAGCACCCA;AGAGCTTCAAGATCAGTCTA;TGTAGAGGAAGACAGGAACA;TCTATTACCGGAACTACCTC;GAAGCTCTGTGGTAATCCTG;GACAGGAACAAGGAAGATGG;AAGGCCTGCAGTGCCAGCAG;GGATACATAGTAATGTGGAA;AGAAATCTCTTCCAGGTCAA	9	6.16485	4.50475	4.65e-05	0.00165152	0.00159035
Psmg2	4	93;1837;2180;2313	GGTGTAAGCAGATACCGGAA;CATCGTTGCGGTGATACGAA;ACTCAGAATCGCTCATCTCA;AACGAACTTTACACTCCTGA	4	6.14767	3.77343	4.65e-05	0.00162036	0.00159035
Tfpt	4	171;221;815;2338	TTCTACGATTTAGTTCCCGC;AGGATGTGGCCACCAAACAG;ATCTCGGTAGTCATCCCCGT;ATCAGGTGCAAAGGATAACT	4	6.12899	4.47693	4.65e-05	0.00159035	0.00159035
Syk	4	120;158;466;7678	GTCTTGGGCTGTACTCCCGG;CACACCACTACACCATCGAG;ATTGCACTACCGCATTGACA;CACCGGGTGGAATAATCTCA	3	6.09861	4.25306	5.43e-05	0.00182168	0.00178915
Fam91a1	4	206;290;892;2458	ATTGATAAGATCATCGACTC;CCTTGAGATAGACTTATCGC;CCAGATCCTTATTATGACGC;TCAGTGAGTTCCTACCTGCG	4	6.04204	4.347	5.43e-05	0.00178915	0.00178915
Tfap4	4	86;265;515;15060	CGCATGCAGAGTATCAACGC;TGGACAAGGAGCGCTCCGTG;AGATGGAGAGAAGCTCAGCA;CATGTACCCGGAAAAACTCA	3	5.96862	4.17167	6.21e-05	0.00200887	0.00190843
Gm2016	11	396;615;988;2194;2671;2999;11708;13128;19309;29292;33276	ATGTTCTGGAAGTTCTCCAT;GGAAGTTGAGAAAAAAGGTT;AATGCTGGGATGTGGACGGT;GGAGGCTGTGCCACATAAGA;AAGGCAAAGGAGGCAAAAAC;TGAATCTGAGAAAAGAGAGT;GAAATCGTGTTTGATGATAT;ATATGGGCAAGAGTATGCTC;TGTGTCCATTTCATTGATTT;TGCTCAGGTGACCAAAATGC;AATGGACACATTTGGTGCTA	6	5.96342	3.65142	6.21e-05	0.00197423	0.00190843
Brd4	4	58;75;523;27115	AGCCATGGCTCGAAAACTCC;TTTGGTACCGTGGATACACC;CCGCCAAGCTGGGTCCTCGG;ACTGCAATATCTGCTCAGAG	3	5.94858	4.58662	6.21e-05	0.00194077	0.00190843
Ilf2	4	186;239;529;6688	TCAGGTGCTGGCTTGACCCG;GCTCAGCAGAATTAGGGGCA;AATGACTACAGGACACAATG;ACAAGTAGGTCAAGGATCCA	3	5.93375	4.13484	6.21e-05	0.00190843	0.00190843
Suz12	4	218;358;555;7415	AGGAGCTGTAGACTTATCGT;AGTCCCTACTGGTAAAAAGC;GCTTCGGGCGGCAAATCCGG;CTGTTTAGAGTAACTCGTCC	3	5.87138	3.96991	7.76e-05	0.00234643	0.00234643
Trim8	4	372;777;1992;2828	AGGGGTACGCTCTGTAGGAA;GGGACACTCGGTGTGTGACG;TTCAGGTGGCCGATCTTAGG;AGCTGCTGGATGAAGACTTG	4	5.79845	3.74978	9.31e-05	0.0027703	0.00268373
Prrc2c	4	397;505;608;41128	CTCAGCCGTCTAAATCGAGG;CTGAACCTCGAATGATGTGG;TTAGCAATACTCACATATGG;TCTTGGTCTTCATAGGAACG	3	5.75284	3.69419	9.31e-05	0.00272632	0.00268373
Actr8	4	449;484;612;31639	ACTGACCGGAAGTGTATCTG;TGAATGTTGTAACAGTCCAG;AGATGTCAAACGGTACAAGG;GCGGCCCATCGTACCCGCGT	3	5.74432	3.68604	9.31e-05	0.00268373	0.00268373
Ubr4	4	261;564;627;9170	CTCAGCTGGATACAACCAGG;GAGCGTGTCATACTGCAAAG;CCTCCGACATTCCGTAACTG;CTGAGCATGTCTAACACGAG	3	5.71285	3.70906	0.000100852	0.00286264	0.00286264
Smarcc1	4	303;444;681;9415	TCAGCTAACACATTGAAGTG;GCTGCAGCAGATGCTACACG;TAAAACACTAGCTGGACTGG;TGAGCAAGAAGATCTTACCA	3	5.60551	3.72073	0.000124125	0.00346987	0.00346987
Sptssa	4	11;132;698;3615	CTGAACACGGTTCGCTCCCA;CAGGTACTGGTAGTAGAACC;CCATCACGCAGATTCGATGC;GTACAGGGCCATCCCCACCA	3	5.57348	4.74689	0.000139641	0.00384534	0.00384534
Ppp1r10	4	1517;1585;1933;3251	GTCGAACCACGCTTCCTGAG;CAGCCACTTACCTCATCCAA;TGAGCTCTGGAACTTCAACA;GAACTGGACGAAACTGAGCG	4	5.5563	3.39851	0.000147399	0.00399928	0.0039036
Usp16	4	60;62;914;3305	AGATGCGGTCCACAAAACTC;TGAAAGGACTCAGTAATTTG;TCTTTACTAAGAACCAACGA;GTGGATACCGACTCCACCCA	4	5.52769	4.67822	0.000155157	0.00414875	0.0039036
Btf3	4	91;97;747;6528	TCCCATAGGGAACTGCTCGT;TTAGGGGTGAACAACATCTC;TCAGCTGCTTTGTCTCAGCG;CAGTTTCTTATCGTCTGCTG	3	5.48535	4.30591	0.000162914	0.00429396	0.0039036
Naca	4	276;344;1175;3399	GGGTCTTCGACAGGTTACAG;CACCTACCTGTCTCAGCCTG;TGAGTCAGTACCAGAGCTCG;ACACACCTGGGCTTGCTGCG	4	5.47897	4.04846	0.000162914	0.00423348	0.0039036
Adipor2	4	971;2681;3389;3409	CAGGCCCGAAAGGAAGGCAT;AACATTTGGACACATCTCCT;CGTGAGGGATCACTCGCCAT;GCACCAACTTGATGATACAA	4	5.47386	3.13219	0.000162914	0.00417468	0.0039036
Rhox4g	16	1496;1640;1645;2340;3358;3449;4018;5439;15729;18197;25106;29332;35801;37319;38614;54191	CGGAGCCGCAGCAGTGGAAG;GGACACCAGTGGCAGTGCCC;CAGGCAGTCTTACCACTGGA;TTTCTTCCCTCTCCATCCAG;CAGTGCTGGTATCTGGTGTG;ACTTCATGAGGGACTTGGCA;CCACTGCTGCGGCTCCGGAC;GGAGAAGGTGGGCCTGCTGC;ACATACAGGTGGGAAGACAC;CCAGATACCAGCACTGGAAT;TCCCTGAGAACTGGCTCCTC;AAGGACAAGGAAAAGTTGAA;ACCAACTACCTACTTCATGA;GCCAGTTCTCAGGGATGCTG;TGCTGTACCCACACTGACTT;TTTGTCCCCTTCCACTGCTG	8	5.46081	3.26336	0.000162914	0.00395496	0.0039036
Rhox4e	16	1035;1640;1645;2340;3358;3449;4018;5439;12976;15593;15729;18197;25106;35801;37319;38614	CGGAGCCGCAGCAGTGGAAT;GGACACCAGTGGCAGTGCCC;CAGGCAGTCTTACCACTGGA;TTTCTTCCCTCTCCATCCAG;CAGTGCTGGTATCTGGTGTG;ACTTCATGAGGGACTTGGCA;CCACTGCTGCGGCTCCGGAC;GGAGAAGGTGGGCCTGCTGC;AAGGACAAGGAAAATTTGAA;TTTGTCCCATTCCACTGCTG;ACATACAGGTGGGAAGACAC;CCAGATACCAGCACTGGAAT;TCCCTGAGAACTGGCTCCTC;ACCAACTACCTACTTCATGA;GCCAGTTCTCAGGGATGCTG;TGCTGTACCCACACTGACTT	8	5.46081	3.27856	0.000162914	0.00395496	0.0039036
Rhox4d	16	1035;1640;1806;2340;3358;3449;4018;5439;12976;15593;18197;25106;30443;35801;37319;38614	CGGAGCCGCAGCAGTGGAAT;GGACACCAGTGGCAGTGCCC;GACACAGACAGTCTTACCAC;TTTCTTCCCTCTCCATCCAG;CAGTGCTGGTATCTGGTGTG;ACTTCATGAGGGACTTGGCA;CCACTGCTGCGGCTCCGGAC;GGAGAAGGTGGGCCTGCTGC;AAGGACAAGGAAAATTTGAA;TTTGTCCCATTCCACTGCTG;CCAGATACCAGCACTGGAAT;TCCCTGAGAACTGGCTCCTC;CAGACAGTCTTACCACTGGA;ACCAACTACCTACTTCATGA;GCCAGTTCTCAGGGATGCTG;TGCTGTACCCACACTGACTT	8	5.46081	3.26482	0.000162914	0.00395496	0.0039036
Rhox4b	16	1035;1640;1806;2340;3358;3449;4018;5439;15593;18197;25106;29332;30443;35801;37319;38614	CGGAGCCGCAGCAGTGGAAT;GGACACCAGTGGCAGTGCCC;GACACAGACAGTCTTACCAC;TTTCTTCCCTCTCCATCCAG;CAGTGCTGGTATCTGGTGTG;ACTTCATGAGGGACTTGGCA;CCACTGCTGCGGCTCCGGAC;GGAGAAGGTGGGCCTGCTGC;TTTGTCCCATTCCACTGCTG;CCAGATACCAGCACTGGAAT;TCCCTGAGAACTGGCTCCTC;AAGGACAAGGAAAAGTTGAA;CAGACAGTCTTACCACTGGA;ACCAACTACCTACTTCATGA;GCCAGTTCTCAGGGATGCTG;TGCTGTACCCACACTGACTT	8	5.46081	3.26482	0.000162914	0.00395496	0.0039036
Ppp4c	4	160;751;763;18122	TGAGAGTCGCCAGATTACCC;TGGACAATTCTATGACCTCA;TAGATCTTCTGTGTGCATGG;GACAATTGACCGAAAGCAAG	3	5.45783	3.61212	0.000162914	0.0039036	0.0039036
Smad4	4	625;2049;2577;3543	CAAAAGCGATCTCCTCCCGA;TGTCACCATACAGAGAACAT;GGTGGCGTTAGACTCTGCCG;TGAATCCATATCACTATGAG	4	5.40689	3.30652	0.000170672	0.00403706	0.00403706
Arf1	4	1248;1790;1808;3610	ATTCTATACAAACTTAAGCT;AGGCCCGTGAAGAGCTCATG;CTGCCCCCCAGGTTTCAATG;CTGGCCGCCCACATCCCACA	4	5.37434	3.36885	0.000186188	0.00434831	0.00434831
Tfe3	4	90;488;829;47450	TCAAGTAGATTTCCAGACAC;GGCGATTCAACATTAACGAT;GGTAGCGTGTAGGGTTCTCG;TGGCCTGCAGTGATATTGGG	3	5.3501	3.78297	0.000201704	0.00465179	0.00448365
Cmtr1	4	260;646;831;4353	ACATGATACGCTCTAATGAG;TCCAATCAGAAAGGTCGACG;AATCCCTATGAGATGATCCG;GCAGGCCTGCCAATTCAGAG	3	5.34697	3.92379	0.000201704	0.00459436	0.00448365
Brd9	4	836;1436;2006;3670	ATTAACCGGTTTCTCCCGGG;ACTTGCTAGACAGTGAACTC;ACGATCGCTCAGACCACGAA;GGAACACTGCGACTCAGAGG	4	5.34571	3.41678	0.000201704	0.00453833	0.00448365
Cul4b	4	63;70;8395;9530	AATCGGCTTTACGCAGCCGA;CTCTTCAGTAGAGTTCGGGG;GACTTACCATTTGCCTACAG;AAAACTATACGGATGAGACA	2	5.3346	3.91766	0.000201704	0.00448365	0.00448365
Smarcd1	4	539;559;933;3730	GGGTCTAATTTAAACTGGGG;GAAGCGGCTAGATATCCAGG;CAATCCGGCTAAGTCGGACG;GTACCGCTCTCCGATGCCCG	4	5.31754	3.90646	0.000209461	0.00460067	0.00454655
Drap1	4	115;166;851;7180	CTGGCAAGCCTTCTTCAACA;GATCAAAAAGATCATGCAGA;GGACAAGGGTCCTCGAAGGT;ATCAGTGCCTGACATGCAGG	3	5.3161	4.08046	0.000209461	0.00454655	0.00454655
Pkm	4	371;660;854;10016	GGGCAGAGTCAATGTCCAGG;TGAAATAGCACATGCCTGTG;CTTCCTGACTTCATGCACGT;TTTCTCTCATGGAACCCATG	3	5.31153	3.47982	0.000217219	0.00466011	0.00466011
Prkd3	4	623;631;884;32935	CCAGTAAGAGAATCCCGTCG;CTGAACCTGACAGTTAGACA;TGAAATCATCACCGATACCG;GATAAACAATGGAGCACACG	3	5.26671	3.40412	0.000232735	0.00493559	0.00493559
Olfr122	4	365;855;909;35711	TGCAACACGAATGAGTCGTG;GGCCAGAAAGAAGTACATTG;ACAGGAGGAAGCATTCTCCA;TGAGGCCCGAGGGATCTCAC	3	5.23051	3.38091	0.000248251	0.0052048	0.0052048
Trem2	4	192;507;942;48024	ACTCTGAAGAACCTCCAAGC;TACCAGTGTCAGAGTCTCCG;TATGACGCCTTGAAGCACTG;CGAAACTCGATGACTCCTCG	3	5.18423	3.60756	0.000310313	0.0064329	0.00636142
Gm21319	9	615;800;988;2671;2999;5391;13128;29292;68511	GGAAGTTGAGAAAAAAGGTT;ACCAACCAATATAATGTCTG;AATGCTGGGATGTGGACGGT;AAGGCAAAGGAGGCAAAAAC;TGAATCTGAGAAAAGAGAGT;TTCTCAACTTTCCTCTTATG;ATATGGGCAAGAGTATGCTC;TGCTCAGGTGACCAAAATGC;GGAGGCAAAAACAGGTGCAG	6	5.18359	3.60408	0.000310313	0.00636142	0.00636142
Smarca4	4	293;425;966;12301	GCTGCAGCACCTTCGAACAG;GAGGTATGTGATGAGCGCGA;CCCTGTGAAGGTGATCCACG;CAAACGTCAGTCACTACGGG	3	5.15159	3.58682	0.000318071	0.0064488	0.00637871
Rad21	4	214;229;974;4921	GTGGAATAACCGGCTACTGA;TAATGCCATTACTTTACCTG;GACAACTCTCGTCCCAAACG;ATGCTTCATTACAGTCTGCG	3	5.14089	4.06401	0.000318071	0.00637871	0.00637871
Smc3	4	350;474;1548;4190	AGCTCAATGAAAACCTACGC;AGTTATTCATTACGATGCCA;AAGAAGAGCGAGGAATTGCG;TCTGCTAAGCGAGAAACGAG	4	5.11552	3.77358	0.000341345	0.00677184	0.00677184
Gm2022	9	396;615;2194;2671;2999;11708;13128;19309;29292	ATGTTCTGGAAGTTCTCCAT;GGAAGTTGAGAAAAAAGGTT;GGAGGCTGTGCCACATAAGA;AAGGCAAAGGAGGCAAAAAC;TGAATCTGAGAAAAGAGAGT;GAAATCGTGTTTGATGATAT;ATATGGGCAAGAGTATGCTC;TGTGTCCATTTCATTGATTT;TGCTCAGGTGACCAAAATGC	5	5.0869	3.16891	0.000364618	0.0071566	0.00708127
Sf3b4	4	2559;2620;4098;4264	TTCAACAAAGCCATAGCCTG;CATCGGCAAACAGCTGGTGA;GCCTTCAAGAAGGACTCTAA;AGGGTCCCGCATGATCTTGG	4	5.0851	2.88039	0.000364618	0.00708127	0.00708127
Hdlbp	4	201;951;3620;4442	TCTGTACGGTTAACACTGGG;TTAGGAAAATGAGCGCACCA;CAGCAGCCGGAAATATGATG;TGATCTTGATCTGATTACTG	4	5.01406	3.38415	0.000418923	0.00805118	0.00805118
Srsf7	4	379;543;1096;25185	ACAGAAACCAAGGTATATGT;AAAGGGCATTCAGTTACTAT;CTATCAAAACGAGATCTCCG;TCCACAAAGGCGAATCCTGG	3	4.98781	3.42493	0.000488743	0.0092962	0.00920134
Eed	4	506;2744;3243;4510	ACTCTTGTGGCAATATTCGG;TTATACGAATGCCATTCACA;ACAAATACGCCAAATGCACC;CAGCAACTGCTAATAGAGGG	4	4.98767	3.08875	0.000488743	0.00920134	0.00920134
Fnbp4	4	249;256;2243;4623	CATCTCAGGACGGAGTGCGT;AGACTCGAATTGCAGACTGG;CAGACATGTATACAAAGGAG;CGAGGCAGATTCGACTGCGG	4	4.94468	3.78077	0.000527533	0.00983129	0.00983129
Ash2l	4	78;110;7616;42796	CAATAACATTGTCAAAACAA;GCTCCGGAGAGGCCGAAAGT;TTACACACCTCGATCATGTA;TGCAATGTGTGCCATCACAG	2	4.94245	3.28345	0.00053529	0.00987611	0.00987611
Rasgrp3	4	354;607;1143;31765	AACGACACCTAATAAGCCTG;ACACGCTAGATATGTCCATG;AACTACGATCATGACCACGA;CCACTGGCATTCCGATACGT	3	4.93336	3.3845	0.000543048	0.00992004	0.00992004
Tyrobp	4	220;452;1147;5206	CTTGACCTCGGGAGACCAGG;CAATCCCAGCCAGTACACCA;AAGGAACAGAAGGCACCAGG;CTGTACGGGACTTAATCCTA	3	4.92883	3.83653	0.000550806	0.00996311	0.00996311
Fzr1	4	833;1130;1245;4689	CCGTCCACACCAGAGCACAA;AATCTTAGAGATCTTGCGTG;GGGGACTCAGTGACTTCCGT;GAGGGCCACACAGCACGAGT	4	4.92005	3.51625	0.000581837	0.0104222	0.0104222
Gm11568	13	1302;2608;2635;2709;3576;3718;7130;14733;15487;31975;36594;49657;61663	CACACAGCTTGGTCTCCAGC;AGGTGGTTTGACAGCAAGGC;GCTGTCAAACCACCTGCTGC;CAGCTGGACTGACAACAGCT;CAGGTGGTCCTGCAGCAGGT;ACAGCTTGGTCTCCAGCAGG;CAGCAGGTGGTTTGACAGCA;CACACAGCATGGCTGGAAGC;GAAGCAGGTCCTGCAGCAGG;CAGCAGCAGGGCTGGCAGCA;AGGGCTGGCAGCAGGGTGTG;GCTGCAGGACCACCTGCTGC;TCTCCAGCTGCTGTCAGCCC	6	4.89554	2.9014	0.000620627	0.0109053	0.0109053
Gm11559	13	1302;2608;2635;2673;3576;3718;7130;14733;15487;31975;36594;49657;61663	CACACAGCTTGGTCTCCAGC;AGGTGGTTTGACAGCAAGGC;GCTGTCAAACCACCTGCTGC;TGGGCTGACAGCAGCTGGGC;CAGGTGGTCCTGCAGCAGGT;ACAGCTTGGTCTCCAGCAGG;CAGCAGGTGGTTTGACAGCA;CACACAGCATGGCTGGAAGC;GAAGCAGGTCCTGCAGCAGG;CAGCAGCAGGGCTGGCAGCA;AGGGCTGGCAGCAGGGTGTG;GCTGCAGGACCACCTGCTGC;TCTCCAGCTGCTGTCAGCCC	6	4.89554	2.90446	0.000620627	0.0109053	0.0109053
Vps52	4	234;349;1200;8820	CACGGCAAGAATTGTCGAGG;CCTACTACCGATCCTATGTG;TGTCGAAGATCCACACCCTG;CGTAACCGACAGGCAGTTCG	3	4.87027	3.58204	0.000690447	0.0120177	0.0118182
Keap1	4	485;1203;2567;4841	TCAAATACGACTGCCCGCAG;GGCACGCTCATAGAGGCACA;GGGCCGCCTCATCTACACAG;CATGTACCAGATTGACAGCG	4	4.86463	3.31244	0.000698205	0.0120391	0.0118182
Tbpl1	4	695;716;1219;56596	TTCTGGCAAACGGATCTCAA;CAGACTACGGGCTAAACGTC;AATTTATAAGCGTGATGTTG;TCAGGAAAAATTATTTGCAC	3	4.84991	3.21348	0.000698205	0.0119277	0.0118182
Kmt2c	4	636;945;2915;4883	AAGCATTACCTGAATCCATG;AAAAGGCCCATTACCCAATG;GGTGAAATGGATGATAGTCG;AGAACCATTATTAGTAAACG	4	4.84963	3.29067	0.000698205	0.0118182	0.0118182
Cwf19l1	4	501;580;1448;4908	ATATCTTACTCACGTCCCCG;TGTGCTTGGTGCCAATAACG;TCGCCGTGAGCTTGAAACCG;CGCCAGCGCTATGAAGCGAG	4	4.84075	3.64465	0.000705963	0.0118409	0.0118409
Actr5	4	271;408;1243;5143	CCTGGGCAGCACACTGACGG;CATCACACTCAGCCGCATGG;GGTAGCCGGATGAAATGATG;ACCGGGACGTTGCGATCGAA	3	4.82464	3.81546	0.000736994	0.01225	0.0121407
Cdk12	4	262;1185;4362;4957	ACAGGAACTTGACTAAATGG;AGGGAGAACGAGGAACGTCG;AGGACCGGAGTAAAAGTCAT;GTCCTTACAGCCGACGACAG	4	4.8235	3.20119	0.000736994	0.0121407	0.0121407
Gm1604b	4	2076;2768;3622;4988	TGCGACTCATCCTACCTCTG;GGAACTATGGAAGAAGATCG;TGGGGTGGGCTCAACATCCA;CTGTTATCAGACCGCCGAAG	4	4.81267	2.86098	0.000760267	0.0124132	0.0123218
Ubr5	4	346;395;2523;5034	ACTTACAGCTGACATAAACG;GCTGTTCTTAGTACAGACCG;CCAATGGCCAAGGATTGCAT;AATGAGGTTTCTACGATCTG	4	4.79672	3.57674	0.000768025	0.0124299	0.0123218
Ino80	4	508;821;2539;5042	AGAAAATGAATTGTCTGACA;TGCCCATCAATGCATGAAGG;GTGACGTGGAGATTCTTCAG;GGGTTGCGGAATATCCTCAC	4	4.79396	3.37528	0.000768025	0.0123218	0.0123218
Slf2	4	752;1535;2339;5079	GAAGACATAAGACAAGGCCG;AATGGAGCAGAGAATCAACT;TCGTCAGGGAAAAATTCTGG;AAGGAGCACCACAAAGATCG	4	4.78126	3.22306	0.000791299	0.0125857	0.0125857
Rabl6	4	291;476;1290;50730	TAAGGAAAGTGTAAAAAACG;CCAGTGAAGATTGTGATCCG;TGTTTGACATCACTAAGCAG;TCATGGAAGATTCAGCATAG	3	4.77654	3.43016	0.000799057	0.0126005	0.0126005
Vapa	4	248;259;1958;5159	TAGTGACTACATCTGTGAAG;AAACAGTCACAATTGACCCC;GGCCGCACACAGTACCGGCG;TCTTAAATTGCAAAATCCAT	4	4.75411	3.7749	0.000814572	0.0127363	0.0127363
Ifnar1	4	247;987;1340;41503	ACAGTTGACATAAACAAGCA;GTGCAGTGTATAAGCACCAC;CTTCTAAACGTACTTCTGGG;TCTCCATGTACAAGCCTCAG	3	4.72727	3.22796	0.000868877	0.0134712	0.0134712
Dynlt1a	13	101;818;1138;1312;3681;3994;9152;9743;9973;16596;16992;26081;35380	GGAAGACTTCCAGGCCTCCG;ACCCCAGGTTACCTCCTCGG;GCTATAGAAAGCGCCATCGG;CTGGTAGGCATTACCACCGA;AGTGAGCAGCATTGTAAAGG;GGGAGACCATTTAAATACAT;ATGGCGCTTTCTATAGCCTA;TGAAGTGAGCAGCATTGTAA;TGAGCCAACTCACCAAACTG;ATCATGCAGAAGAACGGTGC;TAGGCTATAGAAAGCGCCAT;GATGGCGCTTTCTATAGCCT;TTTAAATGGTCTCCCCAGTT	6	4.72002	3.30969	0.000899908	0.0138361	0.0138361
Rhox4f	15	417;659;1640;1806;2340;3358;5439;18197;25412;29332;30443;35801;38614;54191;73583	TCCTTGAGAACTGGCTCCTC;GCCAGTTCTCAAGGATGCTG;GGACACCAGTGGCAGTGCCC;GACACAGACAGTCTTACCAC;TTTCTTCCCTCTCCATCCAG;CAGTGCTGGTATCTGGTGTG;GGAGAAGGTGGGCCTGCTGC;CCAGATACCAGCACTGGAAT;CCAGTCCGGAGCCACAGCAG;AAGGACAAGGAAAAGTTGAA;CAGACAGTCTTACCACTGGA;ACCAACTACCTACTTCATGA;TGCTGTACCCACACTGACTT;TTTGTCCCCTTCCACTGCTG;TGAGGGACTTGTCAAGGACA	6	4.71907	3.28782	0.000907666	0.01384	0.01384
Csnk1a1	4	692;1033;1360;17279	CTGGTCAGCTAACATAAGTA;AAAGGTGCTTACCGTATGTG;CACATCTTGGTATTGAGCAG;TTGCTCTCGTACAGCAACTG	3	4.70808	3.06185	0.000946455	0.0143132	0.0143132
Vmn2r120	4	618;1425;3374;5369	AGATAAAAGGAAACTTCACA;AGGACAAGTAGACCCGTGGA;GAAGTCACATTACCCTACAA;TCAGATGGCATGATCGAGTG	4	4.6848	3.11767	0.00100076	0.0150114	0.0150114
Vcp	4	49;212;1396;68760	ACTGTCTTCACAGACTCATG;CCAATCGCCTTAAAGAGCGC;CTTCAGGAGTTGGTTCAGGT;TATAGGTCGCTTTGACAGAG	3	4.67424	3.88585	0.00101628	0.0151212	0.0151084
Sf3b3	4	129;150;5709;13668	GGCATGGCAGACGAAAACTC;ATGGCGTTTAGGCTAACAGG;GAACACTCTGGTGTATCACG;AAAGCCCGATGCAAATTCCA	2	4.67349	3.24263	0.00102403	0.0151147	0.0151084
Gm11567	14	1302;2608;2635;2709;3576;3718;7130;14733;15487;23899;31975;36594;49657;61663	CACACAGCTTGGTCTCCAGC;AGGTGGTTTGACAGCAAGGC;GCTGTCAAACCACCTGCTGC;CAGCTGGACTGACAACAGCT;CAGGTGGTCCTGCAGCAGGT;ACAGCTTGGTCTCCAGCAGG;CAGCAGGTGGTTTGACAGCA;CACACAGCATGGCTGGAAGC;GAAGCAGGTCCTGCAGCAGG;TGGACTGACAACAGCTAGGC;CAGCAGCAGGGCTGGCAGCA;AGGGCTGGCAGCAGGGTGTG;GCTGCAGGACCACCTGCTGC;TCTCCAGCTGCTGTCAGCCC	6	4.67327	2.76523	0.00103179	0.0151084	0.0151084
Cebpb	4	73;154;3634;7681	GGCTACCAGGCGACGCCGAG;GTAGTCGTCGGCGAAGAGGT;CTCACGTAACCGTAGTCGGC;CGGCTCCGCCTTGAGCGCGG	2	4.65067	3.64766	0.0010861	0.0157783	0.0157783
Rnf126	4	706;848;1840;5522	AGCACTCACCCTTCCAGCGT;GCAAACTGGCTGTATCCCTG;CCCAATGGACTACGCCTGGG;CCAGTCTCGGCATCGGTACG	4	4.63599	3.39782	0.00111713	0.0161023	0.0161023
Pak1ip1	4	288;1215;1463;11511	CAACCAGCACTTAATCAGTG;ACAGGGAGGCAGTGTGCGAG;AGAACATGGAATCTTATAGA;TATGTACTTCCCTCCACTTG	3	4.61354	3.10871	0.00117143	0.0167542	0.0167542
Csnk2a1	4	51;164;13067;15990	GGCCAGTATGATCTTCCGGA;AGACATTGTAAAAGACCCTG;AGTTGTTGTTAAAATTCTCA;GGATTATGAATCACATGTGG	2	4.59614	3.59422	0.00124125	0.0176162	0.0174108
Ppargc1a	4	47;165;39619;42376	GAATGAGGCAAACTTGCTAG;TATTGAGCGAACCTTAAGTG;AAGACCAGTGAACTAAGGGA;TTGCATGCGCACCTTAACAA	2	4.59087	3.60929	0.00124901	0.017591	0.0174108
Rhox3e	15	275;389;791;968;2381;5633;7465;9401;9631;12751;14991;17483;32575;41610;63863	GATACATAGTAATGTGGAAC;CAGAGCGGTGACCGTTGACC;GAAGACAGGAACAAGGAAGA;TGGTAATCCTGAGGTAGTTC;ACTAAAATGGACAGCACCCA;TGTAGAGGAAGACAGGAACA;TCTATTACCGGAACTACCTC;GAAGCTCTGTGGTAATCCTG;GACAGGAACAAGGAAGATGG;AAGGCCTGCAGTGCCAGCAG;GGAAAAAATGAAGAAGATGG;GGATACATAGTAATGTGGAA;GTGACCAGGCTGAAGCGCCA;AGAAATCTCTTCCAGGTCAA;GAGGGAAAAAATGAAGAAGA	4	4.58417	3.34538	0.00125677	0.0174341	0.0174108
Rhox3a	15	275;389;791;968;2381;5633;7465;9401;9631;12751;14991;17483;32575;41610;63863	GATACATAGTAATGTGGAAC;CAGAGCGGTGACCGTTGACC;GAAGACAGGAACAAGGAAGA;TGGTAATCCTGAGGTAGTTC;ACTAAAATGGACAGCACCCA;TGTAGAGGAAGACAGGAACA;TCTATTACCGGAACTACCTC;GAAGCTCTGTGGTAATCCTG;GACAGGAACAAGGAAGATGG;AAGGCCTGCAGTGCCAGCAG;GGAAAAAATGAAGAAGATGG;GGATACATAGTAATGTGGAA;GTGACCAGGCTGAAGCGCCA;AGAAATCTCTTCCAGGTCAA;GAGGGAAAAAATGAAGAAGA	4	4.58417	3.34538	0.00125677	0.0174341	0.0174108
Elmsan1	4	156;1408;1502;14020	GGAGAAGCGGAAAAGCGTGT;TCACTTACTAGAGCGGAGCA;CTGACGGCTTGTGCTCGGTG;TCCCTACTATAACCACCCGG	3	4.57948	3.14342	0.00126453	0.0174108	0.0174108
Safb2	4	392;1169;1514;39718	TCTTCAGAGTTCACAAGACA;GATCAAGATGAACTCACACC;TTTGGTGGCCTCATCTGACG;AGTTACTTTAAGGTCTGACA	3	4.56918	3.06087	0.00129556	0.017706	0.0176322
Metap2	4	1061;1178;2152;5790	GAACGACTTCCGAGAAGCTG;GTTGTTGAGAGAACACCCAG;AATACCCACCCACACAAGAT;GTGATGCTGATGGTGCAACT	4	4.55366	3.21343	0.00130332	0.017681	0.0176322
Slc35b2	4	891;1716;1724;5819	AAGCAATATAGCCTGCCAGT;TACATGGGTGCACCATGACG;GGCTCCGCGGACAGAGACAG;CTGCAGGAAAGAGTGATGAC	4	4.54498	3.22096	0.00131107	0.0176564	0.0176322
Sf3b5	4	163;174;10850;68088	GAGGTCGAAGTGGCCCATGT;CCACGCCGACACCACCAAGT;GCAGTCCAAGTACATCGGCA;TGTAGGAGCAGTAGGAGTCG	2	4.54484	3.31718	0.00131883	0.0176322	0.0176322
Canx	4	811;1349;3945;5930	ATGTTTGGTCCAGATAAGTG;CAGGGGCTGACTCACACTTG;TCACGTGAAGGGTTTACAGG;TTCATCTGGGATCTTAGAAG	4	4.51215	3.00737	0.00141968	0.018844	0.0187094
Traf2	4	169;181;16784;21425	AGTACAAACCTTGTTACTCA;CACAGGTTAAGGGAAACTTG;AGATAACGCTGCCCGCAGAG;CGGACCAGGCCTTTACATGC	2	4.51065	3.29228	0.00141968	0.0187094	0.0187094
Zfp692	4	866;4615;4688;5966	TGACATCAGATACTGAGGTG;AGTGGTGCCTCCTCAAGGAG;CTTAGGTGTGTGCGTAACAG;GAAGGTGCAGGAATCAAAGA	4	4.50164	2.68489	0.0014352	0.0187797	0.0187797
Hist1h4n	13	518;600;765;1201;4981;18180;20617;26375;39246;39495;54458;64521;76691	GTGCTGCGCGATAACATCCA;AGTGCTGCGCGATAACATCC;TGGCAAAGGAGGAAAAGGCC;TATCGCGCAGCACTTTGCGG;CCGCCATCCGCCGCCTGGCC;ATGTCTGGTCGTGGCAAAGG;TGTTATCGCGCAGCACTTTG;GGAACACCTTCAGCACACCG;GGAAAAGGCCTGGGCAAAGG;GGAGGAAAAGGCCTGGGCAA;GGAGACCCGCGGTGTGCTGA;GAACACCTTCAGCACACCGC;CTCATCTACGAGGAGACCCG	4	4.49129	2.95192	0.00145847	0.0188174	0.0188174
Hist1h4m	13	518;600;765;1201;4981;18180;20617;26375;39246;39495;54458;64521;76691	GTGCTGCGCGATAACATCCA;AGTGCTGCGCGATAACATCC;TGGCAAAGGAGGAAAAGGCC;TATCGCGCAGCACTTTGCGG;CCGCCATCCGCCGCCTGGCC;ATGTCTGGTCGTGGCAAAGG;TGTTATCGCGCAGCACTTTG;GGAACACCTTCAGCACACCG;GGAAAAGGCCTGGGCAAAGG;GGAGGAAAAGGCCTGGGCAA;GGAGACCCGCGGTGTGCTGA;GAACACCTTCAGCACACCGC;CTCATCTACGAGGAGACCCG	4	4.49129	2.95192	0.00145847	0.0188174	0.0188174
Etf1	4	296;1670;6016;6065	CGACAATAAGTTTCATACAG;GTGGATCTCCCAAAGAAACA;AGACTCAAACTTTATAACAA;CAAAGACCAGATTTCACGAG	4	4.47305	2.92502	0.00152053	0.0194819	0.0194045
Jak1	4	107;300;1641;7654	TCCGAACCGAATCATCACTG;AAACATATAGTGTACCTCTA;TGAATAAATCCATCAGACAG;CGATGCCATTCGAATGACAG	3	4.46494	3.71956	0.00155932	0.0198411	0.0194045
Ncoa6	4	711;957;1642;39943	TGAACCATAGGATTCCGACC;CAATGACTACAAATCAAGGG;GCTGTTATGACGCCCCAGGG;TGTGCCCAACTTGTTACACA	3	4.46415	2.99857	0.00155932	0.0197052	0.0194045
Dffa	4	1868;2358;4139;6101	CAGCCGCGATCAGCACGGCG;CCTGAGCCAGCTCTGCACAT;AGGGGTGAAGTGGAAGAATG;GCCACAAACTTCGTATTGGA	4	4.46277	2.77503	0.00155932	0.0195711	0.0194045
Gm9992	6	464;981;3776;4173;7275;48540	GGGGAAGCTTGGCAAAGATG;CTTTGTAGAGGCCATCCCAG;CATGAAGGTTGACAGTAATG;CCTTTGTGTACTCTCCAGAG;AGTAATGTGGACCAAAGAGG;GGGTGCAGCCCCTCTGTGGT	5	4.45976	3.06417	0.00156708	0.0194045	0.0194045
Unc93a	6	464;3776;4173;5152;7275;29154	GGGGAAGCTTGGCAAAGATG;CATGAAGGTTGACAGTAATG;CCTTTGTGTACTCTCCAGAG;GCCCACAAAGTGGATACCCA;AGTAATGTGGACCAAAGAGG;CTTTGTAGAAGCCATCCCAG	5	4.45976	2.74696	0.00156708	0.0194045	0.0194045
Pdcl	4	139;196;13188;17702	TTTATGAAGATGGCGTCCCA;CAAAAGGTGTGATCAATGAC;GCAGGTGTGGAACTAATGGC;ACCTCCAGGAGAAAATCAGT	2	4.44166	3.29998	0.00160587	0.0197522	0.0194923
Hnrnpu	4	185;478;1673;7034	AGTTATGGCAGAGAACATGT;AGGAGCTGGAAAAACTACCT;CGTCACCGCGAAGAGCGAGG;AACGGCAGTCTCGACCTAGG	3	4.43995	3.5902	0.00160587	0.0196214	0.0194923
Rhox3h	14	275;389;968;1701;2381;5078;7465;9401;9631;18796;32575;41610;58516;77163	GATACATAGTAATGTGGAAC;CAGAGCGGTGACCGTTGACC;TGGTAATCCTGAGGTAGTTC;GCAAGAAATGAGGAAGATGG;ACTAAAATGGACAGCACCCA;TGTAGAGGAAGATAGGAACA;TCTATTACCGGAACTACCTC;GAAGCTCTGTGGTAATCCTG;GACAGGAACAAGGAAGATGG;TGGAAGAGATTTCTTCCAGC;GTGACCAGGCTGAAGCGCCA;AGAAATCTCTTCCAGGTCAA;GGCTGAAGAGTCAAGAAATG;AAGGCCTGCAGTGCCAGCGG	5	4.43885	3.3378	0.00160587	0.0194923	0.0194923
Tor1b	4	649;1555;1681;11633	GGAACGGCCCCTCAACACGT;CAATGCCTTGAGAATCACTT;GTAGCCGGTGAGCGCCGACA;CAGCTCCAGAAGTGGATCCG	3	4.43378	2.86298	0.0016369	0.0197391	0.0197391
Fli1	4	437;5226;6175;6221	TCACGACTGAATGTCAAGGA;CACAGGAGCACGTTCGACAG;ATTGTGTAAAATGAACAAGG;AAGCAGTCATATCTGCCTTG	4	4.42893	2.62642	0.00165242	0.0197968	0.0197968
Rreb1	4	2167;4588;6054;6231	GGTGTGAGACAAACCTACGG;GCGGATGTGACGGATCAGGG;CCCTACTCTGCTGAAAACGA;CAGCACAACACAGACACGGG	4	4.42614	2.49176	0.00166793	0.0198538	0.0198538
Cd274	4	3824;4039;5782;6339	TGCTGCATAATCAGCTACGG;TCCAAAGGACTTGTACGTGG;GCTTGCGTTAGTGGTGTACT;CTCAGCACAGCAACTTCAGG	4	4.39629	2.47034	0.00176879	0.0209193	0.0209193
Psmb6	4	944;1577;1742;48862	AGTACCTGTGGAAACCAAGC;GGCAGCAGAAGATGTGATCG;ATGGCTGTGCAGTTTAATGG;TCTTACCATCATACCCCCCA	3	4.38768	2.79101	0.00180758	0.0212419	0.0212419
Rbbp5	4	69;585;1764;17297	AAACTCAATTGATTTAATGG;TCTTAAACATACTGATCTCG;CGATGACTCGGATTTGAACG;CCTTACCACAAAGAACAGAC	3	4.37145	3.44296	0.00183085	0.0213792	0.0213792
Phf1	4	1818;2026;2839;6437	TGTGTGTCGCTCTGAGACCG;TGTGGCTGTTAAGAGCAGAA;GAGGTGGTAGAGGACAAGAT;CGATTGCAAAGACACACTGG	4	4.36964	2.90745	0.00184636	0.0214248	0.0214248
Prr22	4	2515;2569;4044;6481	ACTCGATGCGGTAGATTCGG;ACCACCATCGTACCTACGGT;CGGGCCTGTAGAGCCCAAGG;CGTGGGGACTGTGATAAGCA	4	4.3578	2.70863	0.00192394	0.0221855	0.0221366
Olfr761	6	127;679;2072;5357;7635;23304	ACTCTCTATCAGATTCTGTG;CTGTGGATCCAGTGTTGTGA;GCAGCTGTGTGGCTAAGTGG;ATTATGACCTCATAGTGCAG;ACTGGGGAATTGTGACAGAG;AATCCCCATAAAGCAGGCAA	5	4.35704	3.28348	0.0019317	0.0221366	0.0221366
Col4a3bp	4	84;224;5903;49196	CCAGTTTCTCACGTAAACTG;TAATCCGGCCCTCCGAAACG;GTGAAAAGGTCAGGTTACAC;AGACGCCATTGAACAGCACA	2	4.32599	3.17452	0.00203255	0.0231485	0.0231485
Ifnar2	4	319;1190;1851;6620	TAACCTGGATAATCCCTGAA;CAAAGACGAAAATCTGACGA;ACTGTGGAATTACGATTATG;GCCATCGTCATAGTGCACAG	4	4.32094	3.32916	0.00204807	0.0231821	0.0231821
Zfp367	4	304;1332;1876;41999	TAACAGGATGGAATCCGACG;CTGTAACAGGGTATTTCCAA;CGGCTGAACTCCCGACGCTG;CGATACCAGTACGCGCTTCG	3	4.29187	2.96757	0.00220322	0.0247863	0.0247863
Olfr55	6	2071;2818;3474;5979;7894;39917	GCAGGTCAGCCAACATGCGT;CATGGGTTATGACCGCTACG;ATGTGGAGAGAATGTACTGG;CCAGGCAGGCACAGCCACGG;GAACATGACAAGTAAAATGG;ATGTACCTCTTCACTCTGCT	5	4.28617	2.63328	0.00221874	0.0248095	0.0248095
Psmd11	4	227;238;48016;61273	TGACATTCAAGAAAATGATG;AGGCATTATTCATGCAGCAG;GATGTCCAGGCTTTGGTGAG;TAGATATGGAAGCAGCCACA	2	4.27348	3.1101	0.00226529	0.0251774	0.0251774
Cct4	4	1148;2372;2953;6939	GATGGATCGAGTGCTTCGAG;CCGCTTCAGCAATATTTCCG;CTCTCCAATGAGTGTCAATG;AGCAATGATGACAACCGACG	4	4.23918	2.87603	0.00249026	0.0275122	0.0275122
Ddx39b	4	188;816;1970;9949	CCCGCCAAGAAAGACGTCAA;TAAGTACATGCCGAATGTCA;CTCAAAGCCACAGTCAACGA;ACTGCCCACACATCGTCGTG	3	4.2287	3.15542	0.00252905	0.0277744	0.0277744
Rps6ka5	4	1119;2181;6483;7049	CATGTAGTTTCACAATATTG;CCTGGATTCTAACGGCCATG;GATTCGGGACACGACAAGGT;CTTTACCTGAAACAGTCGCT	4	4.21186	2.63853	0.00261439	0.0285417	0.02813
Rai14	4	1420;1903;2315;7054	CACCCGTTGAGCATCCGGCG;TGTGTCCGAGAGAATCGACA;TGTAGATGTTATTGATCGTG;TGGCTACTCGCATCTCCGGG	4	4.21063	2.97184	0.00261439	0.0283738	0.02813
Prkcd	4	299;1294;2008;15385	AGAAGGTGGCGATAAACTCG;CGATGATGTAGAGTGTACCA;AGCCCACCATGTATCCTGAG;TTATAAACCTTGAATCGGTG	3	4.20402	2.94889	0.00263766	0.028459	0.02813
Ahcy	4	1039;1843;2477;7084	TGTCAACGATTCTGTCACCA;GCGCACCTGACAGAAGCTGT;TGACCCTATCATACCCTCCA;TGTGATGATTGCGGGCAAGG	4	4.20326	2.98732	0.00263766	0.0282935	0.02813
Eif1a	7	396;2245;2671;2999;14368;63336;64341	ATGTTCTGGAAGTTCTCCAT;GGATGGGCAGGAGTATGCTC;AAGGCAAAGGAGGCAAAAAC;TGAATCTGAGAAAAGAGAGT;AAAGGTTTGGATAAATACCT;TCAAAATGCTGGGAAATGGA;TGTGCTTTGACGGTGTGAGG	4	4.20241	2.61295	0.00263766	0.02813	0.02813
Taf6l	4	896;1044;2040;54026	ATACTACCAGCAAGTGACAC;GCACGCTGCCCACCAAGGAT;GAATATGTGACTGAGTAGAA;TCATGAAACACACCAAACGA	3	4.1836	2.84772	0.00276179	0.0292845	0.0292845
Gm5934	17	85;225;376;4215;6905;8423;13024;13471;15686;26786;26799;60543;65263;65391;68129;76389;77889	TAGAAGCAGATGAAAATATA;ACGTTCTGTAGAGACACCAA;CTGTGGGTGATACCAAAGGA;TCATCTGCTTCTACGTGAGG;AGACATGCATGAGAAGTCCA;TTCCCATCATCATGAGTTAC;GAAGAGCAGGCTCATTCTGA;TAGAGACACCAATGGAAAAC;TAAGTGGTGAACAGCAAGTT;ACTATGTTGAATAAATCTGG;ATCCAGTAACTCATGATGAT;AAGAAGTAGTTGGAGATATA;GTGTGAGCAGAAGTTTGATA;TTCAGATGAAGAAGAAGAGC;CATGCATGAGAAGTCCATGG;TGTTGAATAAATCTGGAGGT;ATAGTAAAGAGGCCAGCATT	3	4.17398	2.58636	0.00284712	0.0300168	0.0300168
Gapvd1	4	1121;2039;2070;8227	AATACAGTTGCCATACAAGG;ACATACCGGACACAACACTG;GCCTTCCAGAAGATTAACAG;AGAAATGGTAGATTCCAATG	3	4.16475	2.62013	0.00294022	0.0308222	0.0308222
Sin3a	4	237;479;2100;7650	TATGCCTCTTGTAAACGACT;AACGTGGGGATGCATATGGT;TAAAGCCCATGATCAGATCA;AGAACGACACTAAGGTCTTG	3	4.14617	3.45317	0.00302555	0.0315376	0.0314408
Gpank1	4	1511;3119;3186;7326	CAGGTCACAGACTCCAACCC;CTAGAACCCCAAGAGGCAGG;ATGAAGACAGGATGGCCCAG;GGTGAGCAGTAGATGTGTGG	4	4.1449	2.74239	0.00303331	0.0314408	0.0314408
Itch	4	2270;4916;5108;7354	ACAACACTCGGATTACTCAG;AAAACATAATTTACTCGTAG;GCCAAGCTCCCCTACCACCT;TCCCGCACATAGGCTATCTG	4	4.13828	2.4551	0.00312641	0.0322247	0.0322247
Cse1l	4	125;281;40075;78709	GGAACTTACTCGTTACAACA;CTAATAGCATCACTCAGCTA;GCTGCTTGTGATCTTGTACG;GGTACTGCACAGTTCAATGG	2	4.12969	3.16693	0.00322726	0.0330794	0.0330794
Irf9	4	272;923;2652;7418	GGAGAGTGGCCATTTCCCAG;CTTCATCTATGGTGGCCGAG;GTTGTAAACCACTCAGACAG;GTATATCGAATACTGCCAGC	4	4.12322	3.23528	0.00328932	0.0335293	0.0335293
BC005624	4	687;1692;2153;17135	GCGCCGGGCTGACTCGGAGT;CTTGCGGAAGAGGCCAAATG;CCTTTCCAAATGGCGACAGG;TTTCTGCAGAGACCAACCGG	3	4.11399	2.72441	0.0033669	0.0341315	0.0341315
Slc22a7	4	1650;2946;6262;7507	GAGCCTGGGGATAGGCAAAG;CGGAACAGGTCTAAGTACGA;CCGTATCAGGTACCCAACCA;TGCATCGGGAGCAGGAATCG	4	4.10251	2.51907	0.0035143	0.035431	0.035431
Atat1	4	88;295;9639;22214	TCAGTATGTAAATAACGTGC;TGAGCAGCTTCGGCGATGGT;ACATCCACGAGTCGGTGCAA;GACCTCTTAGGATGACCGGG	2	4.08761	3.2218	0.00366945	0.0367943	0.0367943
Samd1	4	361;481;2579;7692	GAGCATCTCGTACCGCAACG;CGTCCCGGCCTGTCTCCGCG;GGAAGTCGTGCGCTACCTCG;AATCCACTCTTGGTAGTGCG	4	4.06022	3.33846	0.00387892	0.0386843	0.0385533
G2e3	4	4242;4311;6825;7698	AGTGTATGTTAATGGCAATG;CCCAGCATAAAGAACTACTG;TGATAACTTCGTTTACACGT;GACATCTTCGAATATCACAG	4	4.05886	2.31067	0.00388667	0.0385533	0.0385533
Trmt12	4	571;5648;7159;7722	CATCACCGAGAAACTTCGAG;CAGCGGACCACGTCACTCCG;GAGATACCGAGACTACCTGG;GTTCAACGTTTGGCAAAACG	4	4.05345	2.44174	0.00395649	0.039036	0.039036
Med24	4	1838;1939;2319;25567	TAGACAGATGAAGTGGCACG;GAAGGATTTAAGCTTCCCAG;GCTACACATCGCCAAACTAG;TCGACTCCGAGAGGATCACC	3	4.01815	2.51785	0.00429784	0.0421783	0.0421783
Sf3a3	4	268;322;19940;23293	ATGTGTGATTCCTTCAGACT;TTTCAACCTATCCAGACCCA;ATAGAATTCAGCGAACTCGT;CAATTCCGATCACCGCACTC	2	4.01184	2.94357	0.00434439	0.0424095	0.0424095
Rhox2a	6	1884;2556;2858;4158;43217;46944	AAAATGTAAAGCGTGTGTCC;AGAGCAGGAGAAATAAGTGC;CACTGGCTGTGACCAGGAGA;GTTGCTGTTATCCATGAGGT;CAGGAGAAATAAGTGCAGGT;GGTCACAGCCAGTGGCACCA	4	3.99932	2.46213	0.00442196	0.0427148	0.0427148
Rhox2e	6	1884;2556;2858;4158;43217;46944	AAAATGTAAAGCGTGTGTCC;AGAGCAGGAGAAATAAGTGC;CACTGGCTGTGACCAGGAGA;GTTGCTGTTATCCATGAGGT;CAGGAGAAATAAGTGCAGGT;GGTCACAGCCAGTGGCACCA	4	3.99932	2.46213	0.00442196	0.0427148	0.0427148
Krtap4-13	11	1141;1516;2929;6440;6725;6747;8321;27509;42650;50703;53557	AGCTGGATACACAGCAGCTG;AGCTGGACACACAACAGCTG;CTGTGGCTCTGTCTGCTCTG;TGGGGCGGCAGCAGGTGGTT;CAGCTGGAAATGCAGCAGCT;CAGGTGGTTTGGCAGCAGCT;GCAGGTGGTTTGGCAGCAGC;CAGCTAGGACGGCAACAAGT;AGCAAGGGCGGCAACAGCTG;GCAGCTAGGACGGCAACAAG;CAGCAAGGGCGGCAACAGCT	6	3.9595	2.30915	0.0046547	0.0447287	0.0447287
Zfp207	4	329;345;2960;60055	CAGTACCAAATGCAATACCT;GGAACACCTGGCATCAATGG;AATAGAATGATGCCAATGGG;GGTGGTCTATTAAGAATACC	2	3.95217	3.14773	0.00474004	0.0453128	0.0453128
Olfr126	7	127;629;2072;5357;7344;9772;59047	ACTCTCTATCAGATTCTGTG;TCCAAAGTAATCATTAGAGC;GCAGCTGTGTGGCTAAGTGG;ATTATGACCTCATAGTGCAG;GAGGGATGAGAGGTCCAGAG;GAAGTGGCTACATTTCATAT;GATGTCTTATGATCGCTATG	5	3.93762	3.05701	0.0048021	0.0456694	0.0456694
Casc3	4	576;2078;2492;12072	GTCTAGAGCAGACTCCTGTG;AGGAATTACTCTCGATCTGG;TCTTCGAGGACAGACTCAGG;GCTCCAGTAGACTCTACCAC	3	3.92538	2.62839	0.00489519	0.046316	0.046316
Uba52	4	2192;2233;2505;13051	GATCTTCGTGAAGACCCTGA;TCCGACTACAACATCCAGAA;ATTCGCGGGCAAACAGCTGG;AGATCCAAGACAAGGAAGGT	3	3.91868	2.4214	0.00493398	0.0464449	0.0464449
H2-Q9	4	701;972;2513;13838	TGGTATTGCAGAGAAAGACC;GTGGACGGCGGTGGACATGG;CTGGTTGTAGTAGCTCTGTG;CGTGCGCTTCGACAGCGATG	3	3.91457	2.81292	0.00499604	0.046554	0.046554
H2-Q7	4	701;972;2513;13838	TGGTATTGCAGAGAAAGACC;GTGGACGGCGGTGGACATGG;CTGGTTGTAGTAGCTCTGTG;CGTGCGCTTCGACAGCGATG	3	3.91457	2.81292	0.00499604	0.046554	0.046554
Krtap9-1	12	1302;2608;2635;3576;3718;7130;14733;15487;31975;36594;49657;70156	CACACAGCTTGGTCTCCAGC;AGGTGGTTTGACAGCAAGGC;GCTGTCAAACCACCTGCTGC;CAGGTGGTCCTGCAGCAGGT;ACAGCTTGGTCTCCAGCAGG;CAGCAGGTGGTTTGACAGCA;CACACAGCATGGCTGGAAGC;GAAGCAGGTCCTGCAGCAGG;CAGCAGCAGGGCTGGCAGCA;AGGGCTGGCAGCAGGGTGTG;GCTGCAGGACCACCTGCTGC;CAGCTGGACTCACAGCACCT	5	3.90055	2.43898	0.00514344	0.0476867	0.0476867
Ddi2	4	746;1446;2574;13566	GAGCCCGGAGAGAACAAGAA;TCAGCAAGGACAACTCATGC;ATGCTACTGAAGTCAATCCG;TCTGTCACCTGAGTCGACAA	3	3.88366	2.68061	0.00532187	0.0490943	0.0490943
Atp1b3	4	522;1847;2594;78583	GCCACAGACTTACAAAAAGT;CGAGCAGCGGAGAGTTTCTG;TCAACACAATTACCTGGACT;CTCCATCAGGACAACTTGTG	3	3.87369	2.65837	0.00538394	0.0494197	0.0492542
Med20	4	245;435;2601;63637	GCCAGCAAGATTGAGACCCG;AGAGGGCAAAGCAGCTCAGT;TTGGTGTCAGCAATGAGGCA;AGGTGGGCACGGTCACAATG	3	3.87022	3.17864	0.00542272	0.0495293	0.0492542
Gm4027	9	396;615;2671;2999;5391;11708;13128;19309;29292	ATGTTCTGGAAGTTCTCCAT;GGAAGTTGAGAAAAAAGGTT;AAGGCAAAGGAGGCAAAAAC;TGAATCTGAGAAAAGAGAGT;TTCTCAACTTTCCTCTTATG;GAAATCGTGTTTGATGATAT;ATATGGGCAAGAGTATGCTC;TGTGTCCATTTCATTGATTT;TGCTCAGGTGACCAAAATGC	5	3.86852	2.83881	0.005446	0.0492542	0.0492542
BB287469	9	396;615;2671;2999;5391;11708;13128;19309;29292	ATGTTCTGGAAGTTCTCCAT;GGAAGTTGAGAAAAAAGGTT;AAGGCAAAGGAGGCAAAAAC;TGAATCTGAGAAAAGAGAGT;TTCTCAACTTTCCTCTTATG;GAAATCGTGTTTGATGATAT;ATATGGGCAAGAGTATGCTC;TGTGTCCATTTCATTGATTT;TGCTCAGGTGACCAAAATGC	5	3.86852	2.83881	0.005446	0.0492542	0.0492542
Abt1	4	96;407;51091;56891	AGTCTACATAACACGCCCAT;CAAGGACTATACCGAAGGCT;CAAAGGCAAGGTGTTCACTG;TGAAGGGGCCGGAATCGCGG	2	3.8093	3.06382	0.00589595	0.0530636	0.0530636
Dpm2	4	973;2502;2771;19262	ACATGCTGGCTGTCAATGAA;TGATCAAGCTAACGGCGACA;ACCGGGACAGACCAAGCAGT;CTTCACCTACTACACCACTT	3	3.78869	2.45694	0.0060899	0.054543	0.054487
Utp15	4	998;2550;2780;47956	GAGAGTACCGGCCATAAATG;TGTCCCAGACTTTAACATAG;GCTGTGGACGACTTTGTAGG;TACAGCTGACAATTATCATG	3	3.78452	2.44669	0.00611317	0.054487	0.054487
Dynlt1b	13	726;1138;1312;3681;3994;5904;9152;9743;9973;16596;16992;26081;35380	GGAAGACTTCCAGGCCTCAG;GCTATAGAAAGCGCCATCGG;CTGGTAGGCATTACCACCGA;AGTGAGCAGCATTGTAAAGG;GGGAGACCATTTAAATACAT;ACCCGAGGTTACCTCCTCTG;ATGGCGCTTTCTATAGCCTA;TGAAGTGAGCAGCATTGTAA;TGAGCCAACTCACCAAACTG;ATCATGCAGAAGAACGGTGC;TAGGCTATAGAAAGCGCCAT;GATGGCGCTTTCTATAGCCT;TTTAAATGGTCTCCCCAGTT	6	3.77935	2.63732	0.00620626	0.0550508	0.0550508
Ccnk	4	1830;1950;2855;22354	TGAAGCGAGCCCCCTCTCGG;TCCCACCATCTCCTATACAT;CCGACAGGCCAAGCGCGCCG;CCTACACCACAAGTGCCCCA	3	3.75026	2.42754	0.0065864	0.0581431	0.0581431
Slc27a4	4	1656;1916;2873;21205	TGACTTCAGGAAACATCGTG;ACAGACCCACAAACTCATTG;TCTACACATCGGGCACCACG;CAAACGGATAGGGTACACAA	3	3.74217	2.44331	0.00667173	0.058616	0.058616
Dhfr	4	1198;2566;2890;76461	AACCTCAGAGAACCACCACG;CAGCCCGGCCAATACCTGAG;GACATGGTTTGGATAGTCGG;TCGCCGTGTCCCAAAATATG	3	3.73458	2.40296	0.00677259	0.05922	0.05922
Cnot10	4	431;780;2895;21283	GATGGCTGCAAACTCCACAC;TCATCTGCGCCAGTACACGG;AAGGGGCAACTATCGAAAAG;TGCCAAGTCCAAGATACACC	3	3.73236	2.88413	0.00683465	0.0594808	0.0594808

## Sheet: D) STARS Negative CR6
Gene Symbol	Number of perturbations	Ranks of perturbations	Perturbations	Most enriched perturbation	STARS Score	Average Score	p-value	FDR	q-value
Csde1	4	9;11;79;16258	TTGAAGTATCATCTGACCGG;TGACGTGGAATTCACAATCA;TGTATGCTACGAACGTAATG;ATTATAGCTTATGACGACTG	3	8.40877	6.23169	0	0	0
Rer1	4	42;116;204;671	CAGTGTCACAACCCACCGGA;AGGTCACAATGTACCAACCC;ACGCAATGAAAAGGTTTAGG;GAAAAATCTGTACACCACCG	4	8.29748	5.76095	0	0	0
Hdac3	4	19;53;1400;1538	GCGGCACATGTCATGCTGGG;GCACATTGAGACAATAGTAG;CAATGTAGAGCACCCGAGGG;GAGCCTTAATGCCTTCAACG	4	6.85655	5.03093	2.33e-05	0.0127927	0.00913762
Prmt7	4	84;280;382;4891	AGTGCCAATGTCAAGAACCA;TGAGCCTGACAGTCACACAC;TTGTGTGCATGCTCATAAGA;CATTAACAAGCACTCCACTG	3	6.35712	4.4282	3.1e-05	0.0127927	0.00913762		MNV-CR6 negative selection STARS ranking with FDR<0.05
Ubl3	4	96;231;1594;2115	AGGACATTAATTACCTCCTA;TCTTCCCACTCACCAAGATG;GTGTATGACAACTGGCCCAT;GTCAGAGGCAGAGTCGTTTG	4	6.30313	4.35583	3.1e-05	0.0102341	0.00913762
Ints3	4	35;119;1112;2148	ATTGTCACATCGATGACCGC;TTTATGCTGTAGTGATACAG;CCCCACAGATGTATCGAATG;GGTGGTCCACAATAAGTCGG	4	6.27624	4.71876	3.88e-05	0.0106606	0.00913762
Ccnc	4	263;296;1023;2170	GTTTCTGGCATCCAAAGTAG;ATTTCAAGAGATTCTATGCT;TGGTCTAGTTACCATGCAAG;TCTGTTGAAAGAGCGCCAAA	4	6.25853	4.32595	3.88e-05	0.00913762	0.00913762
Vmn1r101	17	303;517;637;1189;1623;1739;17510;19213;21290;29028;32459;33226;35907;37527;39740;48130;60896	CATCATAGGCAAACTGCAAG;TCTTGCCACCAGGTGACTGA;CTGATGGAAACTCAGGACAC;CAAATGTGACCACCAGCATC;ATGGAAACTCAGGACACAGG;GAGTTCAGTTGGAGGTGTTT;GTGTTATTGTTTGTTATCTG;GAGGAATAGAGTCAAGGCAT;GGTCTGGGCCAGTGTCTCCA;TGGCCTCTGGCGTCCTGATT;TCTGGACTCAGCTTGGCCTC;TAGAGCAAGTGTCACAAACA;TCCACTTCTGGATTCAGTGT;TTGGCCTCTGGCGTCCTGAT;GTTATTCTTCTTACAGTTGT;GAGAAGTACCATGGAGACAC;CTCCGGTTCCTCTTAATAGA	6	5.97766	3.62771	6.21e-05	0.0127927	0.0127927
Vmn1r149	18	303;517;637;1189;1623;1739;17510;21290;29028;32459;33226;35907;37527;39740;48130;55486;56997;60896	CATCATAGGCAAACTGCAAG;TCTTGCCACCAGGTGACTGA;CTGATGGAAACTCAGGACAC;CAAATGTGACCACCAGCATC;ATGGAAACTCAGGACACAGG;GAGTTCAGTTGGAGGTGTTT;GTGTTATTGTTTGTTATCTG;GGTCTGGGCCAGTGTCTCCA;TGGCCTCTGGCGTCCTGATT;TCTGGACTCAGCTTGGCCTC;TAGAGCAAGTGTCACAAACA;TCCACTTCTGGATTCAGTGT;TTGGCCTCTGGCGTCCTGAT;GTTATTCTTCTTACAGTTGT;GAGAAGTACCATGGAGACAC;GAGGAATCGAGTCAAGGCAT;TATAGTGAGGAATCGAGTCA;CTCCGGTTCCTCTTAATAGA	6	5.81116	3.53626	9.31e-05	0.0170569	0.0138587
Ddx42	4	2;525;622;43754	AAACAAGAGCACACTCCCCG;ACCTCCGAATGATCAATGGG;AGCGTATAATCTTCGATCAG;ACATTGATACGCACACTCAC	3	5.72325	4.43692	9.31e-05	0.0153512	0.0138587
Gm3488	16	1748;2110;3718;4440;4451;5591;5881;6657;7033;38205;49755;71133;72672;75102;77172;78935	TTTGTGGATCAGCATTAAGG;ATGAAAAAGGAAGAAGGAAA;AGACCAACAGAGAAGGAAGA;TCAAATCCTCATACATGTAA;AGAGACCAGACCAACAGAGA;CAGAAAGAGAATGGCTATGA;TGGTTCCATGCAGTATTCCA;AAGGAAGAAGGAAATGGTTA;GAAGGAAATGGTTATGGAGA;TGTGTCACTGACTCACCTGT;CAGTTCCTTGGAATACTGCA;CAGAAGGCTGCTGGTGGAGC;AAGAACTGAAATTGGATATG;TTCTTTGTGGATCAGCATTA;AGGCTATTTCAGAAAGAGAA;TGAATTCAGTGTTCATCCTG	9	5.70824	2.92488	0.000100852	0.0138587	0.0138587
Gm3317	16	1748;2110;3718;4440;4451;5591;5881;6657;7033;38205;49755;71133;72672;75102;77172;78935	TTTGTGGATCAGCATTAAGG;ATGAAAAAGGAAGAAGGAAA;AGACCAACAGAGAAGGAAGA;TCAAATCCTCATACATGTAA;AGAGACCAGACCAACAGAGA;CAGAAAGAGAATGGCTATGA;TGGTTCCATGCAGTATTCCA;AAGGAAGAAGGAAATGGTTA;GAAGGAAATGGTTATGGAGA;TGTGTCACTGACTCACCTGT;CAGTTCCTTGGAATACTGCA;CAGAAGGCTGCTGGTGGAGC;AAGAACTGAAATTGGATATG;TTCTTTGTGGATCAGCATTA;AGGCTATTTCAGAAAGAGAA;TGAATTCAGTGTTCATCCTG	9	5.70824	2.92488	0.000100852	0.0138587	0.0138587
Tfdp1	4	13;86;681;4815	CCTTCATGGAGAAATGCCGC;AAGTGGATGACAGAGTTGGG;TTGGATGCTGCCGGTCTCTG;GTGTTGTTGTGTTCCAGGTG	3	5.60551	4.70519	0.000124125	0.0157448	0.0156355
Crkl	4	70;1962;2218;3228	GGTCCCCGATCTTAAAGCGG;GGGCGCCGGTTCGATTAAGG;GACACGCGAGTTCTCGGACA;CTTACGTTGAAAAGCTTGTG	4	5.56864	3.63991	0.000139641	0.0164477	0.0156355
Cmip	4	74;379;704;15878	TCGATGACCACCATAGACCG;CCTTCAAGACAACCTCCCAG;GAGCTGTAAACAGTACTTCG;CGGTCTCCAGTCATCGTAGT	3	5.56236	3.95476	0.000147399	0.016204	0.0156355
Litaf	4	48;165;923;3350	GATAACAGACATACTTGCGT;CCAACCTATGAAGAAACAGT;GACAGCACATCTGGACGGGG;ACAGGCTGGGTGTAGTACGA	4	5.50419	4.48108	0.000155157	0.0159908	0.0156355
Rnf130	4	197;1127;1378;3469	TGGATCGCCTTGCTACAAAG;CTCGCGTTGTCCGCTCGCGT;CCGCCAAAGAACTTCAGCCG;CTCACGTTCCGCATCGACCG	4	5.44356	3.76874	0.000162914	0.0158027	0.0156355
Vps13d	4	594;1765;3000;3522	CAGATATGTCTGCAACAGTG;CTTCACAGTATCCGATCGAG;GAAAAGGCCGTATGATGCTG;GGTGTCTCTCATTGGACACG	4	5.41721	3.29719	0.000170672	0.0156355	0.0156355
Gabpb2	4	1240;2361;3089;3766	CATTATCAGAACCCTACCTG;GATGTTTGGATGTTACCCAG;TGTGGAATAATGACCATACT;TGATGGACATGTTCACATCG	4	5.30085	3.11996	0.000217219	0.0188523	0.0188523
Pak2	4	1527;2616;3790;3903	GGTGTGCTCAAAATCAGATG;AGGAACTATTGTGAGCATAG;TATCTCTGCAGATTTACACA;CAGTGAGGGACCCACCAGCG	4	5.23878	2.99586	0.000248251	0.0204683	0.0204683
Dars2	4	385;748;921;59972	TCTTCTAAGAAAATGCCGAC;TAGACAGCCAGAGTTCACTC;AAAGCAATATGTGTTCATGA;GTTGCTCGGACCAACACATG	3	5.21349	3.40594	0.000263766	0.0207119	0.0207119
Tmem41b	4	4;83;8875;23353	TATACTTACTCACTAAGCTG;GGAACCCGGAGAGTATACTG;ACATACTTACCAAACAAACA;GGCAGCAAAGATCATCTGAA	2	5.18678	4.44191	0.000310313	0.0232594	0.0232594
Ndufa13	4	36;401;1073;26679	GGTTCCGCTTGTAGTCGATG;GATTCTCCGGGAAAACCTGG;GTGGAACCAGGAGCGCAGGT;ACTGACCCGACAGTCCCCGG	3	5.01531	3.86025	0.000418923	0.030035	0.030035
Eif2s3x	4	43;104;4817;24238	TGACTTACCTATCAACAGAA;CCTGTCACTTACCAATGAGA;GCTTGGATATGCTAATGCTA;ATGTAGGAACCGTAGCAGAA	2	4.9911	3.57912	0.000480986	0.0330477	0.0327492
Rnf145	4	1641;2428;3826;4555	GAAGAACTGGCAAATCATGT;GCTCTTAATATGCATTACGT;ATGATGACGATGGTCTCCAG;CATGGCAGGATCGTTCATGA	4	4.97042	2.93407	0.000496501	0.0327492	0.0327492
Ylpm1	4	5;611;1166;8835	TCCATTGGAACCAAACCCGG;AAATGGGGAACGATCCCTCG;TGAGAATACGGAACAAACGG;GGGGTCGATCCAAAAGACAC	3	4.90753	3.98877	0.000605111	0.038378	0.038378
Zfp574	4	81;127;11264;20655	TCAAGAAGAAGTCTCATGTG;GGGAAGACACGACTGCACAG;CTGAACTCTCCTCACATACG;GTTGCCCACACTCAAGACAC	2	4.81781	3.60484	0.000760267	0.0464326	0.0431752
Pten	4	311;865;1270;5270	ACTATTCCAATGTTCAGTGG;GGTTTGATAAGTTCTAGCTG;CCTCCAATTCAGGACCCACG;TGTGCATATTTATTGCATCG	3	4.79679	3.6212	0.000768025	0.0452312	0.0431752
Slc35a1	4	1;553;1286;7705	ATAGCACCAAAGCCTAACAA;TCTTAAAGCTACGGTGTAAG;GAACACTCAGCAAATTACAG;TGCACAGCATACACTAGTGA	3	4.78057	4.17038	0.000791299	0.0449949	0.0431752
Vmn1r158	17	303;517;637;1189;1623;2959;19213;21290;29028;32459;33226;35907;37527;39740;48130;48477;68058	CATCATAGGCAAACTGCAAG;TCTTGCCACCAGGTGACTGA;CTGATGGAAACTCAGGACAC;CAAATGTGACCACCAGCATC;ATGGAAACTCAGGACACAGG;ACTCTGGTTCCTCTTAATAG;GAGGAATAGAGTCAAGGCAT;GGTCTGGGCCAGTGTCTCCA;TGGCCTCTGGCGTCCTGATT;TCTGGACTCAGCTTGGCCTC;TAGAGCAAGTGTCACAAACA;TCCACTTCTGGATTCAGTGT;TTGGCCTCTGGCGTCCTGAT;GTTATTCTTCTTACAGTTGT;GAGAAGTACCATGGAGACAC;GAACCAGAGTGACAAACTGA;CCCCAAACTGACAAAGCAAG	5	4.76964	3.40944	0.000814572	0.0447743	0.0431752
Cdk6	4	552;1217;1415;5118	GACCTTCGAGCACCCCAACG;AGATGCAACCGACACTCCAG;GCCCGCGACCTGAAGAACGG;TGTTGCAGGTCGTCACGCTG	4	4.76797	3.46442	0.000814572	0.04333	0.0431752
Ifitm2	4	69;1045;1327;12330	AAGATGGTGGGCGATGTGGT;CACACTCACCTTCACAGAGT;CCAGCAACTCAGCTGTTGTG;GCTTGGAGGAAGCCCGGCAT	3	4.7399	3.3995	0.000837846	0.0431752	0.0431752
Gm10406	17	203;1748;2139;3718;4440;4451;4483;35111;38205;61040;65895;71133;72672;73973;75102;77172;78935	GGCTGGCTATAAGTGTCCTG;TTTGTGGATCAGCATTAAGG;CAGTTCCTTGGAGTACTGCA;AGACCAACAGAGAAGGAAGA;TCAAATCCTCATACATGTAA;AGAGACCAGACCAACAGAGA;GAAGGAAATCATTCTGGAGA;GCTGGCTATAAGTGTCCTGT;TGTGTCACTGACTCACCTGT;AGTGCCAAGGAACAGCAGGT;CTCAACTCAACGAAAACGTA;CAGAAGGCTGCTGGTGGAGC;AAGAACTGAAATTGGATATG;CTGGCTATAAGTGTCCTGTG;TTCTTTGTGGATCAGCATTA;AGGCTATTTCAGAAAGAGAA;TGAATTCAGTGTTCATCCTG	7	4.70944	2.59352	0.00093094	0.0465188	0.0465188
Emsy	4	265;1152;1789;5429	TCTTCAGAGTGGTCCATCGA;GTCATGTCAACAGTAGCACA;CTGAATACATCACCACGGGT;ATGGTAGGTTTGATACCAGG	4	4.66549	3.45317	0.00103955	0.0504181	0.0483278
Pdcd10	4	155;1165;1412;13397	CACCGAGTCCCTCCTTCGTA;GAGCCGCTTTCATTAAGGTG;TATCAGAGTACATGATTGAG;CATGTATCCTGTGTTTAATG	3	4.65948	3.22497	0.00105506	0.0497086	0.0483278
AY761184	10	241;423;776;1472;10624;14843;24247;46272;70243;72538	GGATAGGATCAGCCTGGACC;TAAAACTGGGGAGCAGCCAG;ACTGGGCACTTCCGGCACCA;TTGGAAGGCCAGCAGGGCAA;GGCTCTGCTCTTCAATATGT;CCTGCTGGCCTTCCAGGTCC;CTTGGCACTTCTGGCACACT;CTGGACCTGGAAGGCCAGCA;CCTGGACCTGGAAGGCCAGC;GCAGCCAGAGGAAGAGGACC	4	4.65914	3.27229	0.00105506	0.0483278	0.0483278
Mbnl1	4	751;1058;1752;5473	TCTGCATGGATTACATCAAG;GCTCACCACGGGCTGCAACG;GTGTGTCGAGAGTACCAGCG;CTGCACCAATGTTGGTCACG	4	4.65147	3.36354	0.0010861	0.0484047	0.0484047
Defa24	7	67;241;1624;2325;12032;14843;70243	TAAAACTGAGGAGCAGCCAG;GGATAGGATCAGCCTGGACC;CAAAAGAGACAGACACAGCC;ACAGCCTGGTCCTCTTCCCC;CCTGGAAGGCCAGCAGGACG;CCTGCTGGCCTTCCAGGTCC;CCTGGACCTGGAAGGCCAGC	4	4.63322	3.53777	0.00111713	0.0484775	0.0484775
Snapc3	4	1731;2076;3658;5714	TGATAAACTGAGATGCCTCG;GCAGCCGAGCAGCCGACCGA;TGAATTCTCCACCGATCTGG;GCACACGCGCGTGTTCCATG	4	4.57661	2.8776	0.00126453	0.0534668	0.0524187
4930467E23Rik	11	313;324;894;2881;4105;5296;20436;22455;35939;45727;70533	TCATAGCCAATCAAGTAGAG;TTCCACCATGCTATATCCAG;TATAGGCCCATTACAACGAG;CGTATTGCTCACCCACAATG;GACCCAGACATGAACGCCAC;ATGTGGATGAATCTGATAGG;ATCATGTGGATGAATCTGAT;ATTACAACGAGCGGCCAGCG;GACGCTGGTACACTCACCTG;CCACATGATGTTGACTGGAG;TACCCCTGGATATAGCATGG	6	4.54767	3.32141	0.00130332	0.0524187	0.0524187
Gm15319	11	313;324;894;2881;4105;5296;20436;22455;35939;45727;70533	TCATAGCCAATCAAGTAGAG;TTCCACCATGCTATATCCAG;TATAGGCCCATTACAACGAG;CGTATTGCTCACCCACAATG;GACCCAGACATGAACGCCAC;ATGTGGATGAATCTGATAGG;ATCATGTGGATGAATCTGAT;ATTACAACGAGCGGCCAGCG;GACGCTGGTACACTCACCTG;CCACATGATGTTGACTGGAG;TACCCCTGGATATAGCATGG	6	4.54767	3.32141	0.00130332	0.0524187	0.0524187
Srsf1	4	2252;3409;5272;6050	CGCGACGGCTACGACTACGA;ACCTCCGGATATCCGAACCA;CTTAAAGGATCACATGCGTG;CGGGTCCTCGAACTCAACGA	4	4.47735	2.60575	0.00151278	0.0593945	0.0593945

## Sheet: E) Combined CW3 & CR6 Data Sets
Gene	Number.of.perturbations	Ranks.of.perturbations	Perturbations	Most.enriched.perturbation	STARS	Average.Score	p.value	FDR	q.value	screen	virus
4930467E23Rik	11	313;324;894;2881;4105;5296;20436;22455;35939;45727;70533	TCATAGCCAATCAAGTAGAG;TTCCACCATGCTATATCCAG;TATAGGCCCATTACAACGAG;CGTATTGCTCACCCACAATG;GACCCAGACATGAACGCCAC;ATGTGGATGAATCTGATAGG;ATCATGTGGATGAATCTGAT;ATTACAACGAGCGGCCAGCG;GACGCTGGTACACTCACCTG;CCACATGATGTTGACTGGAG;TACCCCTGGATATAGCATGG	6	4.54767	3.32141	0.00130332	0.0524187	0.0524187	Negative	CR6
AY761184	10	241;423;776;1472;10624;14843;24247;46272;70243;72538	GGATAGGATCAGCCTGGACC;TAAAACTGGGGAGCAGCCAG;ACTGGGCACTTCCGGCACCA;TTGGAAGGCCAGCAGGGCAA;GGCTCTGCTCTTCAATATGT;CCTGCTGGCCTTCCAGGTCC;CTTGGCACTTCTGGCACACT;CTGGACCTGGAAGGCCAGCA;CCTGGACCTGGAAGGCCAGC;GCAGCCAGAGGAAGAGGACC	4	4.65914	3.27229	0.00105506	0.0483278	0.0483278	Negative	CR6
Ccnc	4	263;296;1023;2170	GTTTCTGGCATCCAAAGTAG;ATTTCAAGAGATTCTATGCT;TGGTCTAGTTACCATGCAAG;TCTGTTGAAAGAGCGCCAAA	4	6.25853	4.32595	3.88e-05	0.00913762	0.00913762	Negative	CR6
Cdk6	4	552;1217;1415;5118	GACCTTCGAGCACCCCAACG;AGATGCAACCGACACTCCAG;GCCCGCGACCTGAAGAACGG;TGTTGCAGGTCGTCACGCTG	4	4.76797	3.46442	0.000814572	0.04333	0.0431752	Negative	CR6		Combined STARS rankings for all MNoV screens
Cmip	4	74;379;704;15878	TCGATGACCACCATAGACCG;CCTTCAAGACAACCTCCCAG;GAGCTGTAAACAGTACTTCG;CGGTCTCCAGTCATCGTAGT	3	5.56236	3.95476	0.000147399	0.016204	0.0156355	Negative	CR6
Crkl	4	70;1962;2218;3228	GGTCCCCGATCTTAAAGCGG;GGGCGCCGGTTCGATTAAGG;GACACGCGAGTTCTCGGACA;CTTACGTTGAAAAGCTTGTG	4	5.56864	3.63991	0.000139641	0.0164477	0.0156355	Negative	CR6
Crkl	4	525;714;1158;35990	GGGCGCCGGTTCGATTAAGG;GGTCCCCGATCTTAAAGCGG;GACACGCGAGTTCTCGGACA;CTTACGTTGAAAAGCTTGTG	3	4.91646	3.27614	0.000589595	0.0525722	0.0525722	Negative	CW3
Csde1	4	9;11;79;16258	TTGAAGTATCATCTGACCGG;TGACGTGGAATTCACAATCA;TGTATGCTACGAACGTAATG;ATTATAGCTTATGACGACTG	3	8.40877	6.23169	0	0	0	Negative	CR6
Dars2	4	385;748;921;59972	TCTTCTAAGAAAATGCCGAC;TAGACAGCCAGAGTTCACTC;AAAGCAATATGTGTTCATGA;GTTGCTCGGACCAACACATG	3	5.21349	3.40594	0.000263766	0.0207119	0.0207119	Negative	CR6
Ddx42	4	2;525;622;43754	AAACAAGAGCACACTCCCCG;ACCTCCGAATGATCAATGGG;AGCGTATAATCTTCGATCAG;ACATTGATACGCACACTCAC	3	5.72325	4.43692	9.31e-05	0.0153512	0.0138587	Negative	CR6
Defa24	7	67;241;1624;2325;12032;14843;70243	TAAAACTGAGGAGCAGCCAG;GGATAGGATCAGCCTGGACC;CAAAAGAGACAGACACAGCC;ACAGCCTGGTCCTCTTCCCC;CCTGGAAGGCCAGCAGGACG;CCTGCTGGCCTTCCAGGTCC;CCTGGACCTGGAAGGCCAGC	4	4.63322	3.53777	0.00111713	0.0484775	0.0484775	Negative	CR6
Defa24	7	99;506;1797;3739;4199;6470;8810	CCTGGACCTGGAAGGCCAGC;ACAGCCTGGTCCTCTTCCCC;CCTGCTGGCCTTCCAGGTCC;CCTGGAAGGCCAGCAGGACG;GGATAGGATCAGCCTGGACC;TAAAACTGAGGAGCAGCCAG;CAAAAGAGACAGACACAGCC	6	5.73284	3.87728	9.31e-05	0.0298832	0.0229871	Negative	CW3
Eif2s3x	4	43;104;4817;24238	TGACTTACCTATCAACAGAA;CCTGTCACTTACCAATGAGA;GCTTGGATATGCTAATGCTA;ATGTAGGAACCGTAGCAGAA	2	4.9911	3.57912	0.000480986	0.0330477	0.0327492	Negative	CR6
Emsy	4	265;1152;1789;5429	TCTTCAGAGTGGTCCATCGA;GTCATGTCAACAGTAGCACA;CTGAATACATCACCACGGGT;ATGGTAGGTTTGATACCAGG	4	4.66549	3.45317	0.00103955	0.0504181	0.0483278	Negative	CR6
Gabpb2	4	1240;2361;3089;3766	CATTATCAGAACCCTACCTG;GATGTTTGGATGTTACCCAG;TGTGGAATAATGACCATACT;TGATGGACATGTTCACATCG	4	5.30085	3.11996	0.000217219	0.0188523	0.0188523	Negative	CR6
Gm10406	17	203;1748;2139;3718;4440;4451;4483;35111;38205;61040;65895;71133;72672;73973;75102;77172;78935	GGCTGGCTATAAGTGTCCTG;TTTGTGGATCAGCATTAAGG;CAGTTCCTTGGAGTACTGCA;AGACCAACAGAGAAGGAAGA;TCAAATCCTCATACATGTAA;AGAGACCAGACCAACAGAGA;GAAGGAAATCATTCTGGAGA;GCTGGCTATAAGTGTCCTGT;TGTGTCACTGACTCACCTGT;AGTGCCAAGGAACAGCAGGT;CTCAACTCAACGAAAACGTA;CAGAAGGCTGCTGGTGGAGC;AAGAACTGAAATTGGATATG;CTGGCTATAAGTGTCCTGTG;TTCTTTGTGGATCAGCATTA;AGGCTATTTCAGAAAGAGAA;TGAATTCAGTGTTCATCCTG	7	4.70944	2.59352	0.00093094	0.0465188	0.0465188	Negative	CR6
Gm15319	11	313;324;894;2881;4105;5296;20436;22455;35939;45727;70533	TCATAGCCAATCAAGTAGAG;TTCCACCATGCTATATCCAG;TATAGGCCCATTACAACGAG;CGTATTGCTCACCCACAATG;GACCCAGACATGAACGCCAC;ATGTGGATGAATCTGATAGG;ATCATGTGGATGAATCTGAT;ATTACAACGAGCGGCCAGCG;GACGCTGGTACACTCACCTG;CCACATGATGTTGACTGGAG;TACCCCTGGATATAGCATGG	6	4.54767	3.32141	0.00130332	0.0524187	0.0524187	Negative	CR6
Gm3317	16	1748;2110;3718;4440;4451;5591;5881;6657;7033;38205;49755;71133;72672;75102;77172;78935	TTTGTGGATCAGCATTAAGG;ATGAAAAAGGAAGAAGGAAA;AGACCAACAGAGAAGGAAGA;TCAAATCCTCATACATGTAA;AGAGACCAGACCAACAGAGA;CAGAAAGAGAATGGCTATGA;TGGTTCCATGCAGTATTCCA;AAGGAAGAAGGAAATGGTTA;GAAGGAAATGGTTATGGAGA;TGTGTCACTGACTCACCTGT;CAGTTCCTTGGAATACTGCA;CAGAAGGCTGCTGGTGGAGC;AAGAACTGAAATTGGATATG;TTCTTTGTGGATCAGCATTA;AGGCTATTTCAGAAAGAGAA;TGAATTCAGTGTTCATCCTG	9	5.70824	2.92488	0.000100852	0.0138587	0.0138587	Negative	CR6
Gm3488	16	1748;2110;3718;4440;4451;5591;5881;6657;7033;38205;49755;71133;72672;75102;77172;78935	TTTGTGGATCAGCATTAAGG;ATGAAAAAGGAAGAAGGAAA;AGACCAACAGAGAAGGAAGA;TCAAATCCTCATACATGTAA;AGAGACCAGACCAACAGAGA;CAGAAAGAGAATGGCTATGA;TGGTTCCATGCAGTATTCCA;AAGGAAGAAGGAAATGGTTA;GAAGGAAATGGTTATGGAGA;TGTGTCACTGACTCACCTGT;CAGTTCCTTGGAATACTGCA;CAGAAGGCTGCTGGTGGAGC;AAGAACTGAAATTGGATATG;TTCTTTGTGGATCAGCATTA;AGGCTATTTCAGAAAGAGAA;TGAATTCAGTGTTCATCCTG	9	5.70824	2.92488	0.000100852	0.0138587	0.0138587	Negative	CR6
Hdac3	4	19;53;1400;1538	GCGGCACATGTCATGCTGGG;GCACATTGAGACAATAGTAG;CAATGTAGAGCACCCGAGGG;GAGCCTTAATGCCTTCAACG	4	6.85655	5.03093	2.33e-05	0.0127927	0.00913762	Negative	CR6
Ifitm2	4	69;1045;1327;12330	AAGATGGTGGGCGATGTGGT;CACACTCACCTTCACAGAGT;CCAGCAACTCAGCTGTTGTG;GCTTGGAGGAAGCCCGGCAT	3	4.7399	3.3995	0.000837846	0.0431752	0.0431752	Negative	CR6
Ifitm2	4	309;388;754;13340	CACACTCACCTTCACAGAGT;CCAGCAACTCAGCTGTTGTG;AAGATGGTGGGCGATGTGGT;GCTTGGAGGAAGCCCGGCAT	3	5.47324	3.71266	0.000162914	0.0237707	0.0229871	Negative	CW3
Ints3	4	35;119;1112;2148	ATTGTCACATCGATGACCGC;TTTATGCTGTAGTGATACAG;CCCCACAGATGTATCGAATG;GGTGGTCCACAATAAGTCGG	4	6.27624	4.71876	3.88e-05	0.0106606	0.00913762	Negative	CR6
Litaf	4	48;165;923;3350	GATAACAGACATACTTGCGT;CCAACCTATGAAGAAACAGT;GACAGCACATCTGGACGGGG;ACAGGCTGGGTGTAGTACGA	4	5.50419	4.48108	0.000155157	0.0159908	0.0156355	Negative	CR6
Litaf	4	78;81;163;2113	ACAGGCTGGGTGTAGTACGA;CCAACCTATGAAGAAACAGT;GACAGCACATCTGGACGGGG;GATAACAGACATACTTGCGT	3	7.46555	5.34662	7.76e-06	0.00622566	0.00622566	Negative	CW3
Mbnl1	4	751;1058;1752;5473	TCTGCATGGATTACATCAAG;GCTCACCACGGGCTGCAACG;GTGTGTCGAGAGTACCAGCG;CTGCACCAATGTTGGTCACG	4	4.65147	3.36354	0.0010861	0.0484047	0.0484047	Negative	CR6
Ndufa13	4	36;401;1073;26679	GGTTCCGCTTGTAGTCGATG;GATTCTCCGGGAAAACCTGG;GTGGAACCAGGAGCGCAGGT;ACTGACCCGACAGTCCCCGG	3	5.01531	3.86025	0.000418923	0.030035	0.030035	Negative	CR6
Pak2	4	1527;2616;3790;3903	GGTGTGCTCAAAATCAGATG;AGGAACTATTGTGAGCATAG;TATCTCTGCAGATTTACACA;CAGTGAGGGACCCACCAGCG	4	5.23878	2.99586	0.000248251	0.0204683	0.0204683	Negative	CR6
Pdcd10	4	155;1165;1412;13397	CACCGAGTCCCTCCTTCGTA;GAGCCGCTTTCATTAAGGTG;TATCAGAGTACATGATTGAG;CATGTATCCTGTGTTTAATG	3	4.65948	3.22497	0.00105506	0.0497086	0.0483278	Negative	CR6
Prmt7	4	84;280;382;4891	AGTGCCAATGTCAAGAACCA;TGAGCCTGACAGTCACACAC;TTGTGTGCATGCTCATAAGA;CATTAACAAGCACTCCACTG	3	6.35712	4.4282	3.1e-05	0.0127927	0.00913762	Negative	CR6
Pten	4	311;865;1270;5270	ACTATTCCAATGTTCAGTGG;GGTTTGATAAGTTCTAGCTG;CCTCCAATTCAGGACCCACG;TGTGCATATTTATTGCATCG	3	4.79679	3.6212	0.000768025	0.0452312	0.0431752	Negative	CR6
Rer1	4	42;116;204;671	CAGTGTCACAACCCACCGGA;AGGTCACAATGTACCAACCC;ACGCAATGAAAAGGTTTAGG;GAAAAATCTGTACACCACCG	4	8.29748	5.76095	0	0	0	Negative	CR6
Rer1	4	175;273;500;3883	AGGTCACAATGTACCAACCC;CAGTGTCACAACCCACCGGA;ACGCAATGAAAAGGTTTAGG;GAAAAATCTGTACACCACCG	3	6.00704	4.36708	6.21e-05	0.0249026	0.0229871	Negative	CW3
Rnf130	4	197;1127;1378;3469	TGGATCGCCTTGCTACAAAG;CTCGCGTTGTCCGCTCGCGT;CCGCCAAAGAACTTCAGCCG;CTCACGTTCCGCATCGACCG	4	5.44356	3.76874	0.000162914	0.0158027	0.0156355	Negative	CR6
Rnf145	4	1641;2428;3826;4555	GAAGAACTGGCAAATCATGT;GCTCTTAATATGCATTACGT;ATGATGACGATGGTCTCCAG;CATGGCAGGATCGTTCATGA	4	4.97042	2.93407	0.000496501	0.0327492	0.0327492	Negative	CR6
Slc35a1	4	1;553;1286;7705	ATAGCACCAAAGCCTAACAA;TCTTAAAGCTACGGTGTAAG;GAACACTCAGCAAATTACAG;TGCACAGCATACACTAGTGA	3	4.78057	4.17038	0.000791299	0.0449949	0.0431752	Negative	CR6
Snapc3	4	1731;2076;3658;5714	TGATAAACTGAGATGCCTCG;GCAGCCGAGCAGCCGACCGA;TGAATTCTCCACCGATCTGG;GCACACGCGCGTGTTCCATG	4	4.57661	2.8776	0.00126453	0.0534668	0.0524187	Negative	CR6
Srsf1	4	2252;3409;5272;6050	CGCGACGGCTACGACTACGA;ACCTCCGGATATCCGAACCA;CTTAAAGGATCACATGCGTG;CGGGTCCTCGAACTCAACGA	4	4.47735	2.60575	0.00151278	0.0593945	0.0593945	Negative	CR6
Tfdp1	4	13;86;681;4815	CCTTCATGGAGAAATGCCGC;AAGTGGATGACAGAGTTGGG;TTGGATGCTGCCGGTCTCTG;GTGTTGTTGTGTTCCAGGTG	3	5.60551	4.70519	0.000124125	0.0157448	0.0156355	Negative	CR6
Tmem41b	4	4;83;8875;23353	TATACTTACTCACTAAGCTG;GGAACCCGGAGAGTATACTG;ACATACTTACCAAACAAACA;GGCAGCAAAGATCATCTGAA	2	5.18678	4.44191	0.000310313	0.0232594	0.0232594	Negative	CR6
Ubl3	4	96;231;1594;2115	AGGACATTAATTACCTCCTA;TCTTCCCACTCACCAAGATG;GTGTATGACAACTGGCCCAT;GTCAGAGGCAGAGTCGTTTG	4	6.30313	4.35583	3.1e-05	0.0102341	0.00913762	Negative	CR6
Vmn1r101	17	303;517;637;1189;1623;1739;17510;19213;21290;29028;32459;33226;35907;37527;39740;48130;60896	CATCATAGGCAAACTGCAAG;TCTTGCCACCAGGTGACTGA;CTGATGGAAACTCAGGACAC;CAAATGTGACCACCAGCATC;ATGGAAACTCAGGACACAGG;GAGTTCAGTTGGAGGTGTTT;GTGTTATTGTTTGTTATCTG;GAGGAATAGAGTCAAGGCAT;GGTCTGGGCCAGTGTCTCCA;TGGCCTCTGGCGTCCTGATT;TCTGGACTCAGCTTGGCCTC;TAGAGCAAGTGTCACAAACA;TCCACTTCTGGATTCAGTGT;TTGGCCTCTGGCGTCCTGAT;GTTATTCTTCTTACAGTTGT;GAGAAGTACCATGGAGACAC;CTCCGGTTCCTCTTAATAGA	6	5.97766	3.62771	6.21e-05	0.0127927	0.0127927	Negative	CR6
Vmn1r149	18	303;517;637;1189;1623;1739;17510;21290;29028;32459;33226;35907;37527;39740;48130;55486;56997;60896	CATCATAGGCAAACTGCAAG;TCTTGCCACCAGGTGACTGA;CTGATGGAAACTCAGGACAC;CAAATGTGACCACCAGCATC;ATGGAAACTCAGGACACAGG;GAGTTCAGTTGGAGGTGTTT;GTGTTATTGTTTGTTATCTG;GGTCTGGGCCAGTGTCTCCA;TGGCCTCTGGCGTCCTGATT;TCTGGACTCAGCTTGGCCTC;TAGAGCAAGTGTCACAAACA;TCCACTTCTGGATTCAGTGT;TTGGCCTCTGGCGTCCTGAT;GTTATTCTTCTTACAGTTGT;GAGAAGTACCATGGAGACAC;GAGGAATCGAGTCAAGGCAT;TATAGTGAGGAATCGAGTCA;CTCCGGTTCCTCTTAATAGA	6	5.81116	3.53626	9.31e-05	0.0170569	0.0138587	Negative	CR6
Vmn1r158	17	303;517;637;1189;1623;2959;19213;21290;29028;32459;33226;35907;37527;39740;48130;48477;68058	CATCATAGGCAAACTGCAAG;TCTTGCCACCAGGTGACTGA;CTGATGGAAACTCAGGACAC;CAAATGTGACCACCAGCATC;ATGGAAACTCAGGACACAGG;ACTCTGGTTCCTCTTAATAG;GAGGAATAGAGTCAAGGCAT;GGTCTGGGCCAGTGTCTCCA;TGGCCTCTGGCGTCCTGATT;TCTGGACTCAGCTTGGCCTC;TAGAGCAAGTGTCACAAACA;TCCACTTCTGGATTCAGTGT;TTGGCCTCTGGCGTCCTGAT;GTTATTCTTCTTACAGTTGT;GAGAAGTACCATGGAGACAC;GAACCAGAGTGACAAACTGA;CCCCAAACTGACAAAGCAAG	5	4.76964	3.40944	0.000814572	0.0447743	0.0431752	Negative	CR6
Vps13d	4	594;1765;3000;3522	CAGATATGTCTGCAACAGTG;CTTCACAGTATCCGATCGAG;GAAAAGGCCGTATGATGCTG;GGTGTCTCTCATTGGACACG	4	5.41721	3.29719	0.000170672	0.0156355	0.0156355	Negative	CR6
Ylpm1	4	5;611;1166;8835	TCCATTGGAACCAAACCCGG;AAATGGGGAACGATCCCTCG;TGAGAATACGGAACAAACGG;GGGGTCGATCCAAAAGACAC	3	4.90753	3.98877	0.000605111	0.038378	0.038378	Negative	CR6
Zfp574	4	81;127;11264;20655	TCAAGAAGAAGTCTCATGTG;GGGAAGACACGACTGCACAG;CTGAACTCTCCTCACATACG;GTTGCCCACACTCAAGACAC	2	4.81781	3.60484	0.000760267	0.0464326	0.0431752	Negative	CR6
Acbd6	4	136;1535;2700;3599	AGCAATGCAGGAATATATCG;TGATATAGAGAACTAACAAC;CATATCACCAGAGTCGTCCC;AGCCATCAAATCGAAAGCTG	4	5.37964	3.50955	0.000186188	0.0229871	0.0229871	Negative	CW3
Ankrd52	4	375;526;3296;3370	GGAACTGTTAGTTAATAATG;CTACACCATGCAGTACACAG;AATGTCCTTTAACTGCCTAG;GGTCTGTACCTCGTTTCGGG	4	5.49385	3.59461	0.000155157	0.0249026	0.0229871	Negative	CW3
Elob	4	29;198;697;24481	CTTGGCGTCCGTAAAGATGG;CGAACTGAAGCGCATCGTCG;GATGCGCTTCAGTTCGAACA;GCTTCACTAGCCAGACAGCA	3	5.57534	4.28177	0.000139641	0.0249026	0.0229871	Negative	CW3
Hspd1	4	40;1086;1928;3107	TGACTTAGGAAAAGTTGGGG;TCTTGAACTAGGTGTGATGT;AGGGACAATGGACTGAACAC;CGGAGAAGCTCTAAGCACGC	4	5.63501	3.88837	0.000124125	0.0284602	0.0229871	Negative	CW3
Ilf3	4	229;1397;3201;4665	ACCAAAGAACGAGAACCCGG;AGGGCATTCATAGCTTGAGG;GCAGTAACTTCGAGGCCTCG;CGTCCCTCCGACACGCCAAG	4	4.92897	3.30603	0.000550806	0.0520026	0.0520026	Negative	CW3
Ints7	4	21;65;2327;4137	CTCAGGCTTAGCTACACCGG;ACTGGGCGATGGAATGCTTG;TTGACTACAAAGCACCAGAA;TGGCGTCCATCATCCCTGAG	2	5.39892	4.38185	0.000186188	0.0249026	0.0229871	Negative	CW3
N6amt1	4	8;46;73;3941	GGCCCGAGGACCTATCATGG;ACGCCGTTGTACGGGCACGT;CAGGCGGAGTCACTACATAG;CCGCGACGTGTACGAGCCAG	3	8.51165	5.70717	0	0	0	Negative	CW3
Nmt1	4	4;253;1150;1828	CAGGCCTACTCACCACACCA;GATCTCGTTACCTCCTGTTG;CAGCGACATGGAATCCACCC;GGGACCCGCCAAAACCATGG	4	6.55647	4.84988	3.1e-05	0.0166018	0.0166018	Negative	CW3
Plscr1	4	9;158;636;14703	CCAGCATATAATCATCCAGG;ACATAACCTACTGGTACCCC;CTCCACTGAACTGTCCACCG;CTGTACCCGAAACTGCTGTG	3	5.69433	4.5559	0.00010861	0.0290531	0.0229871	Negative	CW3
Taz	4	1916;2594;2657;4270	AGCAGCTCACCTCGACACAC;TATGAGCTCATTGAGAACCG;TTTGGAGAAGCTTAACCATG;GGTCATCCATGCAAGACTGG	4	5.08266	3.04967	0.000364618	0.0390141	0.0390141	Negative	CW3
Ttc14	4	156;213;1099;8186	CATCCACCGTCTTTAATGAG;GTGTTGATCTGTTTAGGAAG;GTGGAGGCTTTGGTAGCGCG;TTAATGCCAGCCATGTGTGG	3	4.98426	3.82078	0.000488743	0.0490271	0.0490271	Negative	CW3
Upf1	4	16;84;2095;16428	GGTAAGCATCCTCGTAACGC;GGTATTACAGTAAACCACGC;AGTGACCCACAACTTCCAAG;TGCTCCAAGTAACATCGCTG	2	5.17639	4.14027	0.000310313	0.0355752	0.0355752	Negative	CW3
Wdr33	4	232;318;684;53574	GAAAGTCAGCCCATTCCACA;CGGGTTGGTGTACTGTAATG;TGGCCAATCATTAACCCTTG;GAAGAGCTTCAAGTATTCCG	3	5.5998	3.85327	0.000124125	0.0249026	0.0229871	Negative	CW3
0610010B08Rik	21	307;766;946;1720;2709;3393;3445;3482;4550;6487;12521;12990;13530;14281;19056;28538;31017;37041;37295;37802;52681	GTTCACATGCACGTCATCAT;GTGTTCGCTTATGTATTTGG;CCCTATGACTGTAAACAATG;TTGTAGAGACTCTTCTGAGA;GAGATGACTGCTATGTGCAA;CACCATGACTGTAACCAATG;CCCTATGAATGTAAACAGTG;ACCACATTGTTTACAGTCAT;TGACTGTAACCAATGTGGTA;GTGGTAAGGACTTTAGAACA;ATACATAATCGAACACATGC;ACCACATTGAATAAACTCAG;CATATGAGAGTGGTAGACAA;CCACACTGTTTACATTCATA;ACCACACTGTTTACATTCAT;GGAAAAGCCTTTGCAAGTAG;GAGTTCACCACTACTTGCAA;AGGCATCAAATTAAACATAA;GACTTCTAGAAGTTTGAAAA;…	9	6.02611	3.80975	6.21e-05	0.00103844	0.000985639	Positive	CW3
2210418O10Rik	7	307;766;1720;3162;5483;10942;12990	GTTCACATGCACGTCATCAT;GTGTTCGCTTATGTATTTGG;TTGTAGAGACTCTTCTGAGA;AGGCATCAAATTAAACATAC;ACTATGACTCTCATATGCAA;GAACTTCACTCAGGAAGAGT;ACCACATTGAATAAACTCAG	5	4.55012	3.29307	0.00130332	0.0131313	0.0131313	Positive	CW3
Aamp	4	209;235;372;506	AAGACCACTCATGTCCCCTG;ATCACCGAGCCTCCACACGA;GGAGGGCCCGGATGATAGTG;TGGATGTGGAAGGTCCCGAA	4	8.78777	5.36154	0	0	0	Positive	CW3
Actb	4	368;889;2834;8834	ATGGAGGGGAATACAGCCCG;CAGCACAGGGTGCTCCTCAG;AATGCCTGTGGTACGACCAG;GGACTCCTATGTGGGTGACG	3	3.75976	2.87832	0.00648555	0.0462126	0.0462126	Positive	CW3
Actr2	4	346;574;1387;8315	GATGGACGTATCATTAAGGT;GGATGACATGAAGCACCTGT;AAGTGAGCTGCGTTCCATGT;GGAGGCTGGATATTGCTGGG	3	4.68262	3.32025	0.00100076	0.0109036	0.0109036	Positive	CW3
Actr3	4	600;751;1090;1828	ATGACACCGATGGGTCAAAG;TAATAGTGGCCAATTCGCCA;TTTCCAAGGACTGCTCAGGA;ACGGGTACAGTAATAGACAG	4	6.55647	4.09078	3.1e-05	0.000700635	0.000646141	Positive	CW3
Adam10	4	1345;1760;2726;33773	GGTTTCATCAAGACTCGTGG;CAAACGAGCAGTCTCACATG;CCCATAAATACGGCCCACAG;TATCTGTGGAAACGGGATGG	3	3.80977	2.51823	0.00588819	0.0432725	0.0429923	Positive	CW3
Ahcy	4	212;347;366;850	TGTGATGATTGCGGGCAAGG;GCGCACCTGACAGAAGCTGT;TGTCAACGATTCTGTCACCA;TGACCCTATCATACCCTCCA	4	7.8867	5.0557	7.76e-06	0.000309323	0.000250658	Positive	CW3
Ahcy	4	1039;1843;2477;7084	TGTCAACGATTCTGTCACCA;GCGCACCTGACAGAAGCTGT;TGACCCTATCATACCCTCCA;TGTGATGATTGCGGGCAAGG	4	4.20326	2.98732	0.00263766	0.0282935	0.02813	Positive	CR6
Ambra1	4	81;275;5871;6476	CCATAACATCTATATTACAG;GGGTATAAATGCGTTCCCAG;AAGCACGGCATCGATTAAGG;TAGAATCTATGCCCCCACCG	4	4.35914	3.43193	0.00192394	0.0180273	0.0180273	Positive	CW3
Apaf1	4	482;781;1401;11697	GAAGAAATCATTTGACCCAG;CATCCTGAGAAAAACACGCG;TACAACGCTCTGCTACACGA;GCTTCCACTTAATATTGAGG	3	4.66961	3.18027	0.00103955	0.0111961	0.0111961	Positive	CW3
Ash2l	4	58;61;370;373	CAATAACATTGTCAAAACAA;GCTCCGGAGAGGCCGAAAGT;TTACACACCTCGATCATGTA;TGCAATGTGTGCCATCACAG	4	9.31754	5.92669	0	0	0	Positive	CW3
Ash2l	4	78;110;7616;42796	CAATAACATTGTCAAAACAA;GCTCCGGAGAGGCCGAAAGT;TTACACACCTCGATCATGTA;TGCAATGTGTGCCATCACAG	2	4.94245	3.28345	0.00053529	0.00987611	0.00987611	Positive	CR6
Atp2b1	4	285;731;992;2250	CAGAAGTTCACCGTCATCAG;CACCGGCCTTACGTGTATCG;AGGAAAAATCCGTGTTACAG;TGTTAGAAATGAAATACCAG	4	6.19564	4.11646	4.65e-05	0.000908636	0.000881102	Positive	CW3
Atxn2l	4	1018;2478;2668;4393	GCACTACTTACTCAGTAACA;GCCACTGCCGAACCAATGGG;TTTCCATAGCAATCCGTAGG;GATGCAGCAGTTCTCGAGGA	4	5.03333	3.11053	0.000403407	0.00481519	0.00481519	Positive	CW3
Atxn2l	4	149;207;418;453	GATGCAGCAGTTCTCGAGGA;GCCACTGCCGAACCAATGGG;TTTCCATAGCAATCCGTAGG;GCACTACTTACTCAGTAACA	4	8.97998	5.43565	0	0	0	Positive	CR6
Bbx	4	617;908;1384;1390	AGAACCCTTGACCCCTACCG;TTAGATCCTACTCAGATGGG;TCAATGATCATAATTCCGTG;CATGTACACCATCGAAGCTG	4	7.03231	4.08861	1.55e-05	0.000427593	0.000398306	Positive	CW3
Bbx	4	312;675;769;1271	TTAGATCCTACTCAGATGGG;TCAATGATCATAATTCCGTG;AGAACCCTTGACCCCTACCG;CATGTACACCATCGAAGCTG	4	7.18779	4.45456	1.55e-05	0.000753326	0.00066573	Positive	CR6
BC005624	4	97;1182;1933;3472	GCGCCGGGCTGACTCGGAGT;CCTTTCCAAATGGCGACAGG;TTTCTGCAGAGACCAACCGG;CTTGCGGAAGAGGCCAAATG	4	5.44205	3.72522	0.000162914	0.00219642	0.00219642	Positive	CW3
BC005624	4	687;1692;2153;17135	GCGCCGGGCTGACTCGGAGT;CTTGCGGAAGAGGCCAAATG;CCTTTCCAAATGGCGACAGG;TTTCTGCAGAGACCAACCGG	3	4.11399	2.72441	0.0033669	0.0341315	0.0341315	Positive	CR6
Bccip	4	109;149;331;624	CCTTAATCACACTCCCAATG;TGCTGAACAAATTAAAGAGT;AATGACACCAGCAAGCCTGT;ATCTCAGATAACGATTATGG	4	8.42363	5.47746	0	0	0	Positive	CW3
Bmyc	4	1097;1497;3176;8247	ATACTTCATGTGCGACGATG;ACGGCGACCGCTTCGCAGGG;GCTGCACCGAGTCATAGTCC;TGGAGAAGCTATCACCGTCG	3	3.61325	2.52674	0.00875083	0.0589894	0.0589894	Positive	CW3
Bop1	4	157;297;1458;3951	TGGCACGTTGAAGCTCTGGG;GTGGGCACAGATACAAATCG;AATTCATCGTACCATGCCAG;CAGGTCATAGAAGCTAGGGG	4	5.21754	4.00575	0.000263766	0.00343262	0.00340895	Positive	CW3
Brd4	4	278;475;10113;30317	AGCCATGGCTCGAAAACTCC;TTTGGTACCGTGGATACACC;ACTGCAATATCTGCTCAGAG;CCGCCAAGCTGGGTCCTCGG	2	3.67584	2.76769	0.0075794	0.0531977	0.0531977	Positive	CW3
Brd4	4	58;75;523;27115	AGCCATGGCTCGAAAACTCC;TTTGGTACCGTGGATACACC;CCGCCAAGCTGGGTCCTCGG;ACTGCAATATCTGCTCAGAG	3	5.94858	4.58662	6.21e-05	0.00194077	0.00190843	Positive	CR6
Bricd5	4	911;3381;6090;7768	GCCCAACCAAACTACTCTAG;CGGTAACAGATGTAGCCCTG;CCAGAACATGGCAACCATCG;CCGGGATACCCACTATGCCC	4	4.04314	2.5458	0.00405735	0.0327736	0.0327736	Positive	CW3
Brix1	4	257;374;713;3421	TCCTTTAACAAAGCATAATG;GAATGGTGAACGTAAACACG;CAGAACAAGACACTTAATGC;AAAAACAGGATCTCTATATG	3	5.54586	4.19733	0.000155157	0.00218619	0.0021538	Positive	CW3
Btf3	4	47;143;394;1129	TCCCATAGGGAACTGCTCGT;TTAGGGGTGAACAACATCTC;TCAGCTGCTTTGTCTCAGCG;CAGTTTCTTATCGTCTGCTG	4	7.3936	5.26328	7.76e-06	0.00025961	0.000250658	Positive	CW3
Btf3	4	91;97;747;6528	TCCCATAGGGAACTGCTCGT;TTAGGGGTGAACAACATCTC;TCAGCTGCTTTGTCTCAGCG;CAGTTTCTTATCGTCTGCTG	3	5.48535	4.30591	0.000162914	0.00429396	0.0039036	Positive	CR6
Casp3	4	650;688;1081;11375	AGAGCGAGATGACATTCCTT;CGGGGTACGGAGCTGGACTG;AACCTCAGAGAGACATTCAT;CATGCAGAAAGACCATACAT	3	5.00568	3.28629	0.000449954	0.0053368	0.00530323	Positive	CW3
Casp9	4	695;798;954;1838	CTGGCTTCACTCTTGCAAAG;CTTCACGCGCGACATGATCG;GAAGAACGACCTGACTGCCA;GTCACAGACCTTGAGACCCG	4	6.54699	4.10301	3.1e-05	0.000692294	0.000646141	Positive	CW3
Cd300lf	4	1;2;3;4	AGTGCCGATATACCTCAGGC;CATCCTCCAAGCAAAGAGCG;GAGTAGTAGCTAGTCAGCGT;GTTACTGTGAACATTGGCCC	4	17.1961	10.6468	0	0	0	Positive	CW3
Cd300lf	4	1;2;3;4	AGTGCCGATATACCTCAGGC;CATCCTCCAAGCAAAGAGCG;GTTACTGTGAACATTGGCCC;GAGTAGTAGCTAGTCAGCGT	4	17.1961	10.6468	0	0	0	Positive	CR6
Cdc40	4	572;1379;1617;2696	ACCTGTCGTAGGCCGCACTG;CCTGATGATTATCTAACGAA;AAATGTATGACTATCAAGGC;TGCATGAGAGAGTCCGCGGC	4	5.88149	3.66915	6.98e-05	0.00107249	0.00107249	Positive	CW3
Cdc5l	4	593;714;1050;14336	CCGGCCTGACCCGATAGACA;ATGCAGATTTCAGGAAACTG;TTGCCTTTAATAGGTACGAA;AATCATTCTTAGGTGCGGGG	3	5.04342	3.3012	0.000395649	0.00475287	0.00475287	Positive	CW3
Cdkn1a	4	390;457;544;12347	GTGGAACTTTGACTTCGTCA;TGCTCCTGTGCGGAACAGGT;CCACGGGACCGAAGAGACAA;CGCAGCCGTGACGACCTGGG	3	5.8974	3.77366	6.98e-05	0.00109953	0.00107249	Positive	CW3
Cdkn1a	4	199;222;244;273	GTGGAACTTTGACTTCGTCA;TGCTCCTGTGCGGAACAGGT;CCACGGGACCGAAGAGACAA;CGCAGCCGTGACGACCTGGG	4	9.85972	5.78432	0	0	0	Positive	CR6
Cebpb	4	242;350;19320;31801	GTAGTCGTCGGCGAAGAGGT;GGCTACCAGGCGACGCCGAG;CGGCTCCGCCTTGAGCGCGG;CTCACGTAACCGTAGTCGGC	2	3.93972	2.92945	0.00479434	0.0365227	0.0365227	Positive	CW3
Cebpb	4	73;154;3634;7681	GGCTACCAGGCGACGCCGAG;GTAGTCGTCGGCGAAGAGGT;CTCACGTAACCGTAGTCGGC;CGGCTCCGCCTTGAGCGCGG	2	4.65067	3.64766	0.0010861	0.0157783	0.0157783	Positive	CR6
Cebpz	4	420;2837;4262;6110	CCTTGGTAACCACTAAAACG;AACGCTCCACAAATGAATGG;CAAGTTGTCAAAGTGCACCC;TGGAGGCAAGTGGTACGACA	4	4.46021	2.88224	0.00156708	0.0153755	0.0153755	Positive	CW3
Cfap20	4	111;133;1038;4978	TCATCTGTACCATGCCCATG;CACATACATCACGTGTCCTG;TCACCCCTATAGGTACGGAA;ATGACAAAAACGTTCGTCGA	3	5.05833	4.22695	0.000380134	0.00459594	0.00459594	Positive	CW3
Cfap20	4	52;297;331;35131	TCATCTGTACCATGCCCATG;CACATACATCACGTGTCCTG;TCACCCCTATAGGTACGGAA;ATGACAAAAACGTTCGTCGA	3	6.54354	4.40306	3.1e-05	0.00121814	0.00119277	Positive	CR6
Chp1	4	114;196;303;672	CTTCACCAGCCTGGACAAAG;ACAGGCGCGTGATCTGACTG;TCAATGCCTTCTTCTCAGAG;ATTGCGGGACGAAGAGCTCG	4	8.2949	5.40978	0	0	0	Positive	CW3
Clasrp	4	433;795;1338;13989	GATGTGCACGAACATCAAAG;GTCTCCATCAGCCATGCCGT;TGTAACTACGAGCGGTACAG;CTGACACTTACCGCTTATAG	3	4.72921	3.21029	0.000868877	0.00969212	0.00969212	Positive	CW3
Clasrp	4	123;461;1329;2235	TGTAACTACGAGCGGTACAG;GTCTCCATCAGCCATGCCGT;CTGACACTTACCGCTTATAG;GATGTGCACGAACATCAAAG	4	6.20726	4.21451	3.88e-05	0.00140325	0.00140325	Positive	CR6
Cmpk1	4	354;942;1174;36065	ACACGACCAACGGCTTCATG;TCAAGGTTGGAACAAAACCA;AAGAATCCAGACTCACAGTA;GCGCGCGCATTGTCGAGGTG	3	4.89867	3.24692	0.000612869	0.0069607	0.00691877	Positive	CW3
Cmtr1	4	862;864;2427;2554	GCAGGCCTGCCAATTCAGAG;AATCCCTATGAGATGATCCG;ACATGATACGCTCTAATGAG;TCCAATCAGAAAGGTCGACG	4	5.97549	3.61828	6.21e-05	0.00101135	0.000985639	Positive	CW3
Cmtr1	4	260;646;831;4353	ACATGATACGCTCTAATGAG;TCCAATCAGAAAGGTCGACG;AATCCCTATGAGATGATCCG;GCAGGCCTGCCAATTCAGAG	3	5.34697	3.92379	0.000201704	0.00459436	0.00448365	Positive	CR6
Col4a3bp	4	332;392;1378;33159	AGACGCCATTGAACAGCACA;TAATCCGGCCCTCCGAAACG;CCAGTTTCTCACGTAAACTG;GTGAAAAGGTCAGGTTACAC	3	4.69105	3.43871	0.000977487	0.0107754	0.0107754	Positive	CW3
Col4a3bp	4	84;224;5903;49196	CCAGTTTCTCACGTAAACTG;TAATCCGGCCCTCCGAAACG;GTGAAAAGGTCAGGTTACAC;AGACGCCATTGAACAGCACA	2	4.32599	3.17452	0.00203255	0.0231485	0.0231485	Positive	CR6
Cript	4	499;644;770;18253	GAGTTATCACTCCAGACACA;GATGGTGCCCGGAACACCAC;ACCACAGGTGAAAAGAAACT;CTTTGACTTCGAAAAAAGCA	3	5.44597	3.48947	0.000162914	0.00221233	0.00219642	Positive	CW3
Csnk2a1	4	20;25;46;18080	GGCCAGTATGATCTTCCGGA;AGACATTGTAAAAGACCCTG;GGATTATGAATCACATGTGG;AGTTGTTGTTAAAATTCTCA	3	9.1132	6.11332	0	0	0	Positive	CW3
Csnk2a1	4	51;164;13067;15990	GGCCAGTATGATCTTCCGGA;AGACATTGTAAAAGACCCTG;AGTTGTTGTTAAAATTCTCA;GGATTATGAATCACATGTGG	2	4.59614	3.59422	0.00124125	0.0176162	0.0174108	Positive	CR6
Csnk2b	4	10;14;16;17	GGGGCAGTAGAGTTTCACCA;GAGGCATCGCACAAATGGTG;GGTGGATGAAGACTACATCC;TCTGGACATGATCTTAGACC	4	14.6826	8.80066	0	0	0	Positive	CW3
Csnk2b	4	31;32;41;43	GAGGCATCGCACAAATGGTG;GGGGCAGTAGAGTTTCACCA;GGTGGATGAAGACTACATCC;TCTGGACATGATCTTAGACC	4	13.0705	7.78896	0	0	0	Positive	CR6
Cycs	4	333;334;809;1207	TCTTCCGCCCGAACAGACCG;GTTCGGGCGGAAGACAGGCC;CTGGGGAGAGGATACCCTGA;TTCTGTTTAGGCATCACCTG	4	7.27754	4.6054	7.76e-06	0.000250658	0.000250658	Positive	CW3
Dcaf7	4	432;450;527;1202	GCTTTGTGGTAGGGTACGGG;AGTCACCACTTGTTGCCAGG;GCACGTTGTGTCAATGCTTG;AGACCCATCAGCGCCCACAG	4	7.28475	4.65415	7.76e-06	0.000255056	0.000250658	Positive	CW3
Dcaf7	4	124;336;403;5326	GCTTTGTGGTAGGGTACGGG;AGACCCATCAGCGCCCACAG;AGTCACCACTTGTTGCCAGG;GCACGTTGTGTCAATGCTTG	3	6.28751	4.29224	3.88e-05	0.00146053	0.00140325	Positive	CR6
Ddx27	4	1047;1122;1964;47582	GGGTCTGTGACAAGTTGCCG;GTAGATCAGACGCTCCAAGA;GGATCCGGCCTAATAGGGAA;TGAGACTGACTACTCCTCTG	3	4.23264	2.82178	0.00250578	0.0220462	0.0220462	Positive	CW3
Ddx39b	4	1302;1392;2023;4469	CCCGCCAAGAAAGACGTCAA;TAAGTACATGCCGAATGTCA;ACTGCCCACACATCGTCGTG;CTCAAAGCCACAGTCAACGA	4	5.00353	3.28898	0.000449954	0.00530323	0.00530323	Positive	CW3
Ddx39b	4	188;816;1970;9949	CCCGCCAAGAAAGACGTCAA;TAAGTACATGCCGAATGTCA;CTCAAAGCCACAGTCAACGA;ACTGCCCACACATCGTCGTG	3	4.2287	3.15542	0.00252905	0.0277744	0.0277744	Positive	CR6
Ddx46	4	609;2689;2842;23884	TCCATGATGTGTCTAAACAT;TCTTCATGGAAATTCCACAC;TGGAGCTTGGAGGACGACGA;AGTCACAAAAGTTGTCACTG	3	3.75613	2.49175	0.00653209	0.046368	0.046368	Positive	CW3
Ddx54	4	118;510;1626;1948	CACATGCACCAGACGCCCAG;AAGAATAGGCTGTGCCACTT;TCATCATCCACTACACTCTG;TGTAGCCACAAAGCACCATG	4	6.44602	4.1916	3.1e-05	0.000668422	0.000646141	Positive	CW3
Ddx55	4	186;418;431;746	AATGGGGATAACAAAAGCCA;GTGCGTGTGTGGAATACTAT;GCGTCCACATCGATGCACGA;TGCACCAATCACCTGAACTG	4	8.11342	5.0331	0	0	0	Positive	CW3
Ddx56	4	338;367;1939;34238	GAGTTCTCCGTTGAGCACGC;CATCGGAATAGCATAAGCTG;AGAAAAGCCTGGTAAATCCG;CAAGTCAAAGGCAAACGTCG	3	4.24919	3.30785	0.0024282	0.0216688	0.0216688	Positive	CW3
Dffa	4	1501;1637;3524;4069	GCCACAAACTTCGTATTGGA;CAGCCGCGATCAGCACGGCG;AGGGGTGAAGTGGAAGAATG;CCTGAGCCAGCTCTGCACAT	4	5.16642	3.1019	0.000318071	0.00402747	0.00394745	Positive	CW3
Dffa	4	1868;2358;4139;6101	CAGCCGCGATCAGCACGGCG;CCTGAGCCAGCTCTGCACAT;AGGGGTGAAGTGGAAGAATG;GCCACAAACTTCGTATTGGA	4	4.46277	2.77503	0.00155932	0.0195711	0.0194045	Positive	CR6
Dffb	4	839;1084;1276;2472	ACATACCTTCAAACCAGGAT;CCTCCGTGCCATCTTCGTAC;GATCCGGGGTTACCTAAGAG;AATGGCAGCTATTTCGACAG	4	6.03218	3.79445	6.21e-05	0.0010769	0.000985639	Positive	CW3
Dnajc2	4	1381;3199;3803;5612	TCAGAATCAAGATCATTATG;GAAACTTCGGAACTCGTGCA;CGCATCTACATCTTCAAACG;ACAGAGCCACGAGGGCACAA	4	4.6079	2.80531	0.00117919	0.0122767	0.0122767	Positive	CW3
Dpm1	4	458;529;1545;63830	ATGGAATCAAACACGCCACG;TGATTAATTTGGCAGCCGTG;GAGAAGCCCCTTCTACCTCT;TCTCTGGAACTCGATACAAG	3	4.54294	3.25718	0.00131883	0.0132165	0.0132165	Positive	CW3
Dpm2	4	261;329;437;8136	TGATCAAGCTAACGGCGACA;CTTCACCTACTACACCACTT;ACATGCTGGCTGTCAATGAA;ACCGGGACAGACCAAGCAGT	3	6.18216	4.02069	4.65e-05	0.000899269	0.000881102	Positive	CW3
Dpm2	4	973;2502;2771;19262	ACATGCTGGCTGTCAATGAA;TGATCAAGCTAACGGCGACA;ACCGGGACAGACCAAGCAGT;CTTCACCTACTACACCACTT	3	3.78869	2.45694	0.0060899	0.054543	0.054487	Positive	CR6
Dpy30	4	33;86;116;2203	TGGTCCAGGTAGGCACGGGT;CGGGCTCACAGACAGCGTTG;TGAGCCCGTACTCAGAGTGA;AGAAAAGTCATCGAAACAGA	3	7.90848	5.51946	7.76e-06	0.000316047	0.000250658	Positive	CW3
Dpy30	4	36;94;183;2168	TGGTCCAGGTAGGCACGGGT;CGGGCTCACAGACAGCGTTG;TGAGCCCGTACTCAGAGTGA;AGAAAAGTCATCGAAACAGA	3	7.31487	5.34928	7.76e-06	0.000397589	0.000397589	Positive	CR6
Dynlt1a	13	651;903;1112;3043;3149;3835;3850;6184;6586;8228;10959;34632;63984	TGAGCCAACTCACCAAACTG;ATGGCGCTTTCTATAGCCTA;TAGGCTATAGAAAGCGCCAT;CTGGTAGGCATTACCACCGA;GATGGCGCTTTCTATAGCCT;TGAAGTGAGCAGCATTGTAA;GGAAGACTTCCAGGCCTCCG;GGGAGACCATTTAAATACAT;ACCCCAGGTTACCTCCTCGG;GCTATAGAAAGCGCCATCGG;TTTAAATGGTCTCCCCAGTT;ATCATGCAGAAGAACGGTGC;AGTGAGCAGCATTGTAAAGG	9	7.0379	4.12884	1.55e-05	0.000440551	0.000398306	Positive	CW3
Dynlt1a	13	101;818;1138;1312;3681;3994;9152;9743;9973;16596;16992;26081;35380	GGAAGACTTCCAGGCCTCCG;ACCCCAGGTTACCTCCTCGG;GCTATAGAAAGCGCCATCGG;CTGGTAGGCATTACCACCGA;AGTGAGCAGCATTGTAAAGG;GGGAGACCATTTAAATACAT;ATGGCGCTTTCTATAGCCTA;TGAAGTGAGCAGCATTGTAA;TGAGCCAACTCACCAAACTG;ATCATGCAGAAGAACGGTGC;TAGGCTATAGAAAGCGCCAT;GATGGCGCTTTCTATAGCCT;TTTAAATGGTCTCCCCAGTT	6	4.72002	3.30969	0.000899908	0.0138361	0.0138361	Positive	CR6
Dynlt1b	13	651;903;1112;3043;3149;3835;6184;6680;8228;10959;26275;34632;63984	TGAGCCAACTCACCAAACTG;ATGGCGCTTTCTATAGCCTA;TAGGCTATAGAAAGCGCCAT;CTGGTAGGCATTACCACCGA;GATGGCGCTTTCTATAGCCT;TGAAGTGAGCAGCATTGTAA;GGGAGACCATTTAAATACAT;ACCCGAGGTTACCTCCTCTG;GCTATAGAAAGCGCCATCGG;TTTAAATGGTCTCCCCAGTT;GGAAGACTTCCAGGCCTCAG;ATCATGCAGAAGAACGGTGC;AGTGAGCAGCATTGTAAAGG	8	5.6912	3.56364	0.00010861	0.00156565	0.00156565	Positive	CW3
Dynlt1b	13	726;1138;1312;3681;3994;5904;9152;9743;9973;16596;16992;26081;35380	GGAAGACTTCCAGGCCTCAG;GCTATAGAAAGCGCCATCGG;CTGGTAGGCATTACCACCGA;AGTGAGCAGCATTGTAAAGG;GGGAGACCATTTAAATACAT;ACCCGAGGTTACCTCCTCTG;ATGGCGCTTTCTATAGCCTA;TGAAGTGAGCAGCATTGTAA;TGAGCCAACTCACCAAACTG;ATCATGCAGAAGAACGGTGC;TAGGCTATAGAAAGCGCCAT;GATGGCGCTTTCTATAGCCT;TTTAAATGGTCTCCCCAGTT	6	3.77935	2.63732	0.00620626	0.0550508	0.0550508	Positive	CR6
Dynlt1c	13	651;903;1112;3043;3149;3835;3850;6184;8228;10959;34632;36580;63984	TGAGCCAACTCACCAAACTG;ATGGCGCTTTCTATAGCCTA;TAGGCTATAGAAAGCGCCAT;CTGGTAGGCATTACCACCGA;GATGGCGCTTTCTATAGCCT;TGAAGTGAGCAGCATTGTAA;GGAAGACTTCCAGGCCTCCG;GGGAGACCATTTAAATACAT;GCTATAGAAAGCGCCATCGG;TTTAAATGGTCTCCCCAGTT;ATCATGCAGAAGAACGGTGC;ACCCGAGGTTACCTCCTCGG;AGTGAGCAGCATTGTAAAGG	7	6.10404	3.76521	5.43e-05	0.000997718	0.000951096	Positive	CW3
Dynlt1f	13	651;903;1112;3043;3149;3835;3850;6184;8228;10959;34632;36580;63984	TGAGCCAACTCACCAAACTG;ATGGCGCTTTCTATAGCCTA;TAGGCTATAGAAAGCGCCAT;CTGGTAGGCATTACCACCGA;GATGGCGCTTTCTATAGCCT;TGAAGTGAGCAGCATTGTAA;GGAAGACTTCCAGGCCTCCG;GGGAGACCATTTAAATACAT;GCTATAGAAAGCGCCATCGG;TTTAAATGGTCTCCCCAGTT;ATCATGCAGAAGAACGGTGC;ACCCGAGGTTACCTCCTCGG;AGTGAGCAGCATTGTAAAGG	7	6.10404	3.76521	5.43e-05	0.000997718	0.000951096	Positive	CW3
Dyrk1a	4	18;28;32;190	TCATTGGCACCACTGAACAG;TCTTGATTGCACTCCGTTTG;TAATAGGAGTACAAACCACC;TCAGCAACCTCTAACTAACC	4	10.4894	7.31235	0	0	0	Positive	CW3
Dyrk1a	4	7;14;23;193	TCATTGGCACCACTGAACAG;TAATAGGAGTACAAACCACC;TCTTGATTGCACTCCGTTTG;TCAGCAACCTCTAACTAACC	4	10.4621	7.66607	0	0	0	Positive	CR6
Ebna1bp2	4	244;272;4823;38075	CTGTAATGTCAGCTACCGGC;ATTTCTGCAAAATAATCGGT;TCTAGCACGACATTGAGACC;GCAGACTAAACAGGCCGCCA	2	4.15787	3.05064	0.00297901	0.0254916	0.0254916	Positive	CW3
Eif5b	4	60;396;1007;1958	GAAGAGTCCTGATTCTGATG;TCCGTTCCTACCGTAGACAG;CGTACGACAAAGCGAAACGG;GACTGCCAGACCTAACTCAG	4	6.43712	4.4724	3.1e-05	0.000660826	0.000646141	Positive	CW3
Eif6	4	198;355;966;1822	GGTCCACCCAGACTTGGACA;CTGACTCCGTGCAGATACGG;CACAAACGCCTACTGCCTGG;TGTGTCTTCAGTAATCAGGG	4	6.56218	4.41171	3.1e-05	0.000709179	0.000646141	Positive	CW3
Emc6	4	753;2662;3083;9290	ACAGCGCTGACACTGAGGTC;CCGGCAGTAATCCAGGACCG;TGAAGCCGTAGAGGCCGGTG;AGGGCCGCCGTTCATCAGCG	3	3.65145	2.42974	0.00797505	0.0549458	0.0549458	Positive	CW3
Ezh2	4	284;590;2197;2397	TATCGTAGTAAGTACCAATG;TTATCAGCAGGAAATTTCCG;AGAGTACATTATAGGCACCG;GACACCACCTAAACGCCCAG	4	6.0857	3.87818	5.43e-05	0.000988031	0.000951096	Positive	CW3
Ezh2	4	182;310;480;1227	TATCGTAGTAAGTACCAATG;AGAGTACATTATAGGCACCG;GACACCACCTAAACGCCCAG;TTATCAGCAGGAAATTTCCG	4	7.24899	4.84894	1.55e-05	0.000773686	0.00066573	Positive	CR6
Fam50a	4	483;1548;2163;34220	AGAGCCATCCCAGTAACTAA;TGACATGAAGGCCAAACAGG;CCATGCACCTAATGAAGAAG;AGAGATGGCTATGTACGAGG	3	4.10801	2.79752	0.00346775	0.0291415	0.0291415	Positive	CW3
Fam96b	4	256;341;1428;2684	GCTCCGGGTCATTAATGGAG;GATGGAGAGGCCAATAAGCG;CCTCATCTATGAGCGTTCCG;TCCCGGGCGTCGATGCTGTC	4	5.88924	4.09784	6.98e-05	0.00108135	0.00107249	Positive	CW3
Ftsj3	4	164;555;686;2420	GGAGAGGCTTGATTGGAACG;TCGCAAGAAGTCCGTAACTG;AAGGCATTGGACATCAGGTA;TTGTGATGAAACAACCACCA	4	6.06911	4.32338	5.43e-05	0.000960068	0.000951096	Positive	CW3
G3bp1	4	5;6;7;15	CCACACCAAGATCCGCCACG;ACACCTGTGCAACATGTCCG;CATCTTCAGGTACCAAGATG;TGCCGGGGCCACATCAGCCG	4	14.9	9.38348	0	0	0	Positive	CW3
G3bp1	4	5;6;27;42	ACACCTGTGCAACATGTCCG;CCACACCAAGATCCGCCACG;CATCTTCAGGTACCAAGATG;TGCCGGGGCCACATCAGCCG	4	13.1114	8.49665	0	0	0	Positive	CR6
Gapvd1	4	528;2983;3196;8085	ACATACCGGACACAACACTG;AATACAGTTGCCATACAAGG;AGAAATGGTAGATTCCAATG;GCCTTCCAGAAGATTAACAG	3	3.60519	2.43272	0.00887496	0.0596117	0.0596117	Positive	CW3
Gapvd1	4	1121;2039;2070;8227	AATACAGTTGCCATACAAGG;ACATACCGGACACAACACTG;GCCTTCCAGAAGATTAACAG;AGAAATGGTAGATTCCAATG	3	4.16475	2.62013	0.00294022	0.0308222	0.0308222	Positive	CR6
Gemin7	4	202;401;4683;9081	GAGGTAGCGCTCTCGCAGAG;GTGAGTTTCACGCTGCACGA;AGCCTCTGCTGAAGCCATCG;GATGGTCCTACGTCCATCAG	2	3.82213	2.97836	0.00581837	0.0432684	0.0429923	Positive	CW3
Gm13271	17	1363;2716;3448;3651;4317;4856;6663;8664;17432;24289;35804;38130;65325;68344;71675;71815;78934	AACATCACACAGATGACTCT;TAACATCACACAGATGACTC;CACTTGATTCTGGTAAATCT;CTCGTGCCAGGCAGCTCTGC;TTGGACTCTGACGATCTCCC;GAGCTCTGCTAGGAAGCGCG;GAGGTGGAGGACATGCCTGA;GCAGAGCTCCGAAGCGTGCC;CGGAGCTCTGCTAGGAAGCG;GCTGAAGAGGCCAAGAGAGC;TTCCCATGTCCCTGGAAGGA;GCCGGGTCATCAGTGCCTGC;TCAGCATCACCCCTCCCACC;GTGCATCTATTCCTGGTGGG;CTTCCAGGGACATGGGAAAT;GTGAGCTGCAAGTGCTGAAG;GGAAATCGGTCCTGTCCCGC	7	3.63258	2.2016	0.00833191	0.0567782	0.0567782	Positive	CW3
Gm13547	4	800;1051;3172;19217	GAGAGACATCTGCCAGACGA;AAGAAACATAGTGTCATCAG;TGAAGGAGGAGACCCGAGTG;GACAATCAGTTAGAGCCGAA	3	3.61487	2.67211	0.00872756	0.0590449	0.0589894	Positive	CW3
Gm14296	7	307;766;1720;3162;5483;10942;12990	GTTCACATGCACGTCATCAT;GTGTTCGCTTATGTATTTGG;TTGTAGAGACTCTTCTGAGA;AGGCATCAAATTAAACATAC;ACTATGACTCTCATATGCAA;GAACTTCACTCAGGAAGAGT;ACCACATTGAATAAACTCAG	5	4.55012	3.29307	0.00130332	0.0131313	0.0131313	Positive	CW3
Gm14305	22	307;766;946;1720;2709;3393;3445;3482;4550;5043;6487;12521;12990;13530;14281;18795;19056;28538;31017;37041;37802;52681	GTTCACATGCACGTCATCAT;GTGTTCGCTTATGTATTTGG;CCCTATGACTGTAAACAATG;TTGTAGAGACTCTTCTGAGA;GAGATGACTGCTATGTGCAA;CACCATGACTGTAACCAATG;CCCTATGAATGTAAACAGTG;ACCACATTGTTTACAGTCAT;TGACTGTAACCAATGTGGTA;AAACTTCTCGAAGTCATGGA;GTGGTAAGGACTTTAGAACA;ATACATAATCGAACACATGC;ACCACATTGAATAAACTCAG;CATATGAGAGTGGTAGACAA;CCACACTGTTTACATTCATA;TATGTGTTCGTTTATGGTTT;ACCACACTGTTTACATTCAT;GGAAAAGCCTTTGCAAGTAG;GAGTTCACCACTACTTGCAA;…	11	6.53701	4.04225	3.1e-05	0.000684149	0.000646141	Positive	CW3
Gm14308	21	307;766;946;1720;2709;3393;3445;3482;4550;6487;12521;12990;13530;14281;19056;28538;31017;37041;37295;37802;52681	GTTCACATGCACGTCATCAT;GTGTTCGCTTATGTATTTGG;CCCTATGACTGTAAACAATG;TTGTAGAGACTCTTCTGAGA;GAGATGACTGCTATGTGCAA;CACCATGACTGTAACCAATG;CCCTATGAATGTAAACAGTG;ACCACATTGTTTACAGTCAT;TGACTGTAACCAATGTGGTA;GTGGTAAGGACTTTAGAACA;ATACATAATCGAACACATGC;ACCACATTGAATAAACTCAG;CATATGAGAGTGGTAGACAA;CCACACTGTTTACATTCATA;ACCACACTGTTTACATTCAT;GGAAAAGCCTTTGCAAGTAG;GAGTTCACCACTACTTGCAA;AGGCATCAAATTAAACATAA;GACTTCTAGAAGTTTGAAAA;…	9	6.02611	3.80975	6.21e-05	0.00103844	0.000985639	Positive	CW3
Gm14322	14	307;766;1244;1669;1720;3393;4550;6487;10856;10942;12990;13530;52681;72449	GTTCACATGCACGTCATCAT;GTGTTCGCTTATGTATTTGG;CATCAAATAAAACATACTGG;CCACATTGAATAAACTCAGG;TTGTAGAGACTCTTCTGAGA;CACCATGACTGTAACCAATG;TGACTGTAACCAATGTGGTA;GTGGTAAGGACTTTAGAACA;ATACATAAGCGAACACATGC;GAACTTCACTCAGGAAGAGT;ACCACATTGAATAAACTCAG;CATATGAGAGTGGTAGACAA;CTGCAAAGGCTTTACCACAT;TGTGTTCGCTTATGTATTTG	8	5.45625	3.87042	0.000162914	0.00222848	0.00219642	Positive	CW3
Gm14325	18	307;766;946;1720;2709;3162;3393;3482;4550;6487;12521;12907;12990;13530;16589;40826;49539;52681	GTTCACATGCACGTCATCAT;GTGTTCGCTTATGTATTTGG;CCCTATGACTGTAAACAATG;TTGTAGAGACTCTTCTGAGA;GAGATGACTGCTATGTGCAA;AGGCATCAAATTAAACATAC;CACCATGACTGTAACCAATG;ACCACATTGTTTACAGTCAT;TGACTGTAACCAATGTGGTA;GTGGTAAGGACTTTAGAACA;ATACATAATCGAACACATGC;CAAGCTCAGAACTCCAAACA;ACCACATTGAATAAACTCAG;CATATGAGAGTGGTAGACAA;GAGAGTATAGAATACTGCAA;GGAAAAGCCTTTGTAAGCAG;GACTTCTAGAAGTTTGAAGA;CTGCAAAGGCTTTACCACAT	9	6.73088	4.23093	2.33e-05	0.000559161	0.000552083	Positive	CW3
Gm14326	16	766;946;1720;2709;3393;3482;4550;6487;12521;12990;13530;16589;37041;37295;40826;52681	GTGTTCGCTTATGTATTTGG;CCCTATGACTGTAAACAATG;TTGTAGAGACTCTTCTGAGA;GAGATGACTGCTATGTGCAA;CACCATGACTGTAACCAATG;ACCACATTGTTTACAGTCAT;TGACTGTAACCAATGTGGTA;GTGGTAAGGACTTTAGAACA;ATACATAATCGAACACATGC;ACCACATTGAATAAACTCAG;CATATGAGAGTGGTAGACAA;GAGAGTATAGAATACTGCAA;AGGCATCAAATTAAACATAA;GACTTCTAGAAGTTTGAAAA;GGAAAAGCCTTTGTAAGCAG;CTGCAAAGGCTTTACCACAT	8	4.89803	3.19031	0.000612869	0.00691877	0.00691877	Positive	CW3
Gm14391	19	766;946;1720;2709;3393;3482;4550;5568;6487;12521;12990;13530;14875;28538;37041;37295;37802;43850;52681	GTGTTCGCTTATGTATTTGG;CCCTATGACTGTAAACAATG;TTGTAGAGACTCTTCTGAGA;GAGATGACTGCTATGTGCAA;CACCATGACTGTAACCAATG;ACCACATTGTTTACAGTCAT;TGACTGTAACCAATGTGGTA;GAGGTCACCACTACTTGCAA;GTGGTAAGGACTTTAGAACA;ATACATAATCGAACACATGC;ACCACATTGAATAAACTCAG;CATATGAGAGTGGTAGACAA;CAGTAATCTATACTCTCCAA;GGAAAAGCCTTTGCAAGTAG;AGGCATCAAATTAAACATAA;GACTTCTAGAAGTTTGAAAA;TATGTGTTCGCTCATGTTTG;GAGATGACTGCATTCTGAAA;CTGCAAAGGCTTTACCACAT	9	5.2049	3.15997	0.000271524	0.00346147	0.00346147	Positive	CW3
Gm14434	21	307;766;946;1720;2709;3393;3445;3482;4550;6487;12521;12990;13530;14281;19056;28538;31017;37041;37295;37802;52681	GTTCACATGCACGTCATCAT;GTGTTCGCTTATGTATTTGG;CCCTATGACTGTAAACAATG;TTGTAGAGACTCTTCTGAGA;GAGATGACTGCTATGTGCAA;CACCATGACTGTAACCAATG;CCCTATGAATGTAAACAGTG;ACCACATTGTTTACAGTCAT;TGACTGTAACCAATGTGGTA;GTGGTAAGGACTTTAGAACA;ATACATAATCGAACACATGC;ACCACATTGAATAAACTCAG;CATATGAGAGTGGTAGACAA;CCACACTGTTTACATTCATA;ACCACACTGTTTACATTCAT;GGAAAAGCCTTTGCAAGTAG;GAGTTCACCACTACTTGCAA;AGGCATCAAATTAAACATAA;GACTTCTAGAAGTTTGAAAA;…	9	6.02611	3.80975	6.21e-05	0.00103844	0.000985639	Positive	CW3
Gm3417	8	742;780;1516;1596;3728;4145;13325;75802	GATGACTCAATTGCTGATGT;CCCCGGTGTCTAAGAGAGAA;CCAATTCAAGTGACAAATGA;GAAGCCTAGCATGTTCGAGA;GCAATTGAGTCATCAAACGG;CCTTTCTCTCTTAGACACCG;GGATTGATGCGTTTGGCCGG;TTGTCACTTGAATTGGCAGA	6	6.30068	3.90877	3.88e-05	0.000798801	0.000773307	Positive	CW3
Gm3448	7	742;780;1516;1596;3728;4145;13325	GATGACTCAATTGCTGATGT;CCCCGGTGTCTAAGAGAGAA;CCAATTCAAGTGACAAATGA;GAAGCCTAGCATGTTCGAGA;GCAATTGAGTCATCAAACGG;CCTTTCTCTCTTAGACACCG;GGATTGATGCGTTTGGCCGG	6	6.87953	4.18321	1.55e-05	0.000398306	0.000398306	Positive	CW3
Gm4724	21	307;766;946;1720;2709;3393;3445;3482;4550;6487;12521;12990;13530;14281;19056;28538;31017;37041;37295;37802;52681	GTTCACATGCACGTCATCAT;GTGTTCGCTTATGTATTTGG;CCCTATGACTGTAAACAATG;TTGTAGAGACTCTTCTGAGA;GAGATGACTGCTATGTGCAA;CACCATGACTGTAACCAATG;CCCTATGAATGTAAACAGTG;ACCACATTGTTTACAGTCAT;TGACTGTAACCAATGTGGTA;GTGGTAAGGACTTTAGAACA;ATACATAATCGAACACATGC;ACCACATTGAATAAACTCAG;CATATGAGAGTGGTAGACAA;CCACACTGTTTACATTCATA;ACCACACTGTTTACATTCAT;GGAAAAGCCTTTGCAAGTAG;GAGTTCACCACTACTTGCAA;AGGCATCAAATTAAACATAA;GACTTCTAGAAGTTTGAAAA;…	9	6.02611	3.80975	6.21e-05	0.00103844	0.000985639	Positive	CW3
Gm6710	19	766;946;1720;2709;3393;3482;4550;5568;6487;12521;12990;13530;14875;28538;37041;37295;37802;43850;52681	GTGTTCGCTTATGTATTTGG;CCCTATGACTGTAAACAATG;TTGTAGAGACTCTTCTGAGA;GAGATGACTGCTATGTGCAA;CACCATGACTGTAACCAATG;ACCACATTGTTTACAGTCAT;TGACTGTAACCAATGTGGTA;GAGGTCACCACTACTTGCAA;GTGGTAAGGACTTTAGAACA;ATACATAATCGAACACATGC;ACCACATTGAATAAACTCAG;CATATGAGAGTGGTAGACAA;CAGTAATCTATACTCTCCAA;GGAAAAGCCTTTGCAAGTAG;AGGCATCAAATTAAACATAA;GACTTCTAGAAGTTTGAAAA;TATGTGTTCGCTCATGTTTG;GAGATGACTGCATTCTGAAA;CTGCAAAGGCTTTACCACAT	9	5.2049	3.15997	0.000271524	0.00346147	0.00346147	Positive	CW3
Gml	5	379;1861;4385;5364;7990	TGTAGACATAGAGCAGCCGA;GTATTCGACAACACTACTGG;ACATATCCACTATTGTGACA;AGCACCCTAGGGAGTTCTGG;AATAGAAGGTGTTATGCTCC	4	4.01773	2.69239	0.00429784	0.0339838	0.0339838	Positive	CW3
Gosr1	4	633;1415;1909;8897	TGGCTTGATCCATTTAATAG;CACAGCGGCTCACGGGATGG;GCTCGTACAGAGTTTACTGA;AGAATCTCATGGGATCAGTA	3	4.26934	2.83849	0.0022808	0.0204508	0.0204508	Positive	CW3
Gpat4	4	267;411;534;664	GTAGAGCTTTCGGATACCAA;CAGCGACGGCTACTACGCCA;TAGTAGTTCCCACTACCAAG;AAAGGACCTAAGCTTACCGT	4	8.3157	4.97874	0	0	0	Positive	CW3
Gpr21	4	4565;4591;4797;5372	GAACAATGTGAAGTAGGAGT;GTAGAATGATGGTTCAACAG;GCCTTTAACCTATAATACCC;GATATCCGGGTTTACCCCAG	4	4.68383	2.55936	0.00100076	0.0109674	0.0109036	Positive	CW3
Gtpbp4	4	253;410;26320;33487	TGGATTATAAGTATCTGCGC;AATAGTACACATTCGTCCAA;GATGAATATTCTCTATGACA;CAGAAGGAGTGATAGCTCGA	2	3.80295	2.8515	0.00596577	0.0433328	0.0433328	Positive	CW3
H2-Ke6	4	2299;2354;2658;3405	CAGGACACAACGACAGATGG;TGCGATCAGCGTGCGCCTAG;TTCCAAGCGGATGTGTCTCA;CATTAGTAGCATCATTGGAA	4	5.4759	3.15009	0.000162914	0.00224486	0.00219642	Positive	CW3
H2-T3	4	1382;1769;1871;50489	CTGGTTATACAGAGCTCCGT;CGTGCGCTTCAACAGCTCAG;GTCAGCAGGGTAGAAGCGCA;CATTGAGGGCAATGTAATCG	3	4.29532	2.67492	0.00219547	0.0198759	0.0198759	Positive	CW3
Hdac1	4	128;286;407;465	TGATCCTAGGTACCACCAGA;TAAAGGGAGTTCTCACCCGT;CTTACCGACAGAGCCTCCCG;GCAGCGAGCAACATTCCGGA	4	8.93456	5.37939	0	0	0	Positive	CW3
Hdac1	4	142;1010;1323;1626	TGATCCTAGGTACCACCAGA;CTTACCGACAGAGCCTCCCG;GCAGCGAGCAACATTCCGGA;TAAAGGGAGTTCTCACCCGT	4	6.75989	4.16981	2.33e-05	0.0009759	0.0009759	Positive	CR6
Hnrnpf	4	163;199;1931;7715	ACAGGGAAAGCATGGGACAC;TTGTGAGGCAAACTGAACGA;AGAAGGCAGGCAGAGTGGTG;CATGAATTGTGCAGTCGGAG	2	4.4285	3.70689	0.00165242	0.0160447	0.0160447	Positive	CW3
Hnrnph1	4	283;752;927;1672	AAATGGGATAACATTGCCGG;AAAGGCTCTAAAGAAACACA;AAAGCGCTGCACTTCATCCG;AGCCACCGTCCCCATATCTG	4	6.71143	4.26205	2.33e-05	0.000552083	0.000552083	Positive	CW3
Icmt	4	951;989;1128;4717	GAACTCTATCCAAGAAGACA;TCAGCCCGCACCTGGTAGCG;GTTGGAGCCAGCCGTAAACA;CCAGCCAAAGTGATTCCAAG	3	4.95049	3.5603	0.000527533	0.00614035	0.00614035	Positive	CW3
Ino80	4	531;1170;2285;2523	GTGACGTGGAGATTCTTCAG;AGAAAATGAATTGTCTGACA;TGCCCATCAATGCATGAAGG;GGGTTGCGGAATATCCTCAC	4	5.9967	3.62927	6.21e-05	0.00102022	0.000985639	Positive	CW3
Ino80	4	508;821;2539;5042	AGAAAATGAATTGTCTGACA;TGCCCATCAATGCATGAAGG;GTGACGTGGAGATTCTTCAG;GGGTTGCGGAATATCCTCAC	4	4.79396	3.37528	0.000768025	0.0123218	0.0123218	Positive	CR6
Itch	4	1183;1282;1532;6757	TCCCGCACATAGGCTATCTG;GCCAAGCTCCCCTACCACCT;AAAACATAATTTACTCGTAG;ACAACACTCGGATTACTCAG	3	4.55388	3.22679	0.00130332	0.0133465	0.0131313	Positive	CW3
Itch	4	2270;4916;5108;7354	ACAACACTCGGATTACTCAG;AAAACATAATTTACTCGTAG;GCCAAGCTCCCCTACCACCT;TCCCGCACATAGGCTATCTG	4	4.13828	2.4551	0.00312641	0.0322247	0.0322247	Positive	CR6
Kcmf1	4	132;549;934;1344	GAAACATCAACAGAAGTGGT;GATGCAGTGCATATTAACAA;TGTTTGATCTCCGAGCACGA;TTGAGTTACGATGAATCGAG	4	7.09078	4.5044	1.55e-05	0.000454318	0.000398306	Positive	CW3
Kdm1a	4	1372;1814;2065;10117	TCTAACAAACAGGATCGAGT;AATTGGAAGCCAATCCCCCA;GCTGGTCCGTCGGCCCTCCG;TCAACTTCGGCATCTACAAG	3	4.16787	2.62632	0.00293246	0.0252084	0.0252084	Positive	CW3
Khdrbs1	4	274;322;5963;39133	TAGGAGGAAGAGTTGCGCAA;AGAGCATAAGCTTCACACGG;TTCAGGTACTCCGTTCAAGT;AGACGGGGTCAGACGCACCG	2	4.01184	2.89541	0.00434439	0.0342075	0.0341647	Positive	CW3
Kmt2b	4	1211;3119;4420;5633	GGGCCTGTTAAGCTCAAAGG;GTGAACCCTCTACTCCCCGA;CCGGGGTGTCTTGATAACAC;GACAGCGTTCACATTCCAGG	4	4.60141	2.77443	0.00121022	0.0125301	0.0125301	Positive	CW3
Kmt2d	4	19;23;48;79	AAATGGCTGTTGATCCCATG;GTTCACCATTAATACCCCCA;TCGGGCCGGACTAACATCCG;TGGGGATGGACAGCCCGACG	4	12.0139	7.59826	0	0	0	Positive	CW3
Kmt2d	4	21;33;53;105	AAATGGCTGTTGATCCCATG;GTTCACCATTAATACCCCCA;TCGGGCCGGACTAACATCCG;TGGGGATGGACAGCCCGACG	4	11.5196	7.35321	0	0	0	Positive	CR6
Las1l	4	673;1000;1395;77848	CTGCGGCACTCATTTATATG;TAGGATACATTGTACACGTG;TCTCCGAGTTGTCTACCGTG;TTGTGAATCTTATCTCAGAG	3	4.67517	3.06409	0.00101628	0.0110087	0.0110087	Positive	CW3
Ldha	4	214;489;727;8453	CAAGCTGGTCATTATCACCG;GTTGCAATCTGGATTCAGCG;GTCATGGAAGACAAACTCAA;GGAGAACATGGCGACTCCAG	3	5.5206	3.7145	0.000155157	0.00216988	0.0021538	Positive	CW3
Lsg1	4	68;113;586;3280	TAGGTGGGCTACCCTAATGT;AGTTCTTGTGTATACCAAGG;AGTGAACAATGATAGCTACC;AGACTTGATCTCGCTTAGTG	3	5.80073	4.68209	9.31e-05	0.00138459	0.00135239	Positive	CW3
Lsm12	4	2190;2425;3916;7796	CTAACATTGAGTGAAGCTAG;TTGGGAGCCAGGTGTCGTGC;GACACCAGCGCTGATTGCAT;CCAGAATGTCCCTCTTCCAG	4	4.03688	2.66447	0.00410389	0.0328662	0.0328662	Positive	CW3
Lsm12	4	137;176;314;423	CTAACATTGAGTGAAGCTAG;GACACCAGCGCTGATTGCAT;CCAGAATGTCCCTCTTCCAG;TTGGGAGCCAGGTGTCGTGC	4	9.09901	5.60266	0	0	0	Positive	CR6
Ly6c1	6	1104;2459;4230;4654;13713;62519	ACTGTGTGCAGAAAGAGGTG;GGCAGAAAGAAAGGCACTGA;CCCTGATTGGCACACCAGCA;TGCAGAATCCATCAGAGGCG;CACAAGAAGAATGAGCACAC;GCAGAAAGAAAGGCACTGAC	4	3.80928	2.35324	0.00589595	0.0429923	0.0429923	Positive	CW3
Ly6c2	6	820;2459;4230;4654;48134;62519	ACTGTGTGCAGGAAGAGGTG;GGCAGAAAGAAAGGCACTGA;CCCTGATTGGCACACCAGCA;TGCAGAATCCATCAGAGGCG;CTGATGTTAGGATCCTTGAT;GCAGAAAGAAAGGCACTGAC	4	3.80928	2.38357	0.00589595	0.0429923	0.0429923	Positive	CW3
Mak16	4	352;532;547;1437	CATCCTAGAACCAAGACTCA;GCAGTGCTACCTGTACATGA;TGAGTAAGAAGGTTGAACGA;CATTTGTGTCTGATAAAGCG	4	6.97455	4.55027	1.55e-05	0.000415376	0.000398306	Positive	CW3
Mamdc4	4	1285;1322;2856;9350	CAATCTGGGGCCCATACAGG;TCGAAGCCATCGATAGCCTG;AGGGACGTGTAATACCTTGG;CCTGTGTGTGGCATTTCGGG	3	3.74981	2.58575	0.0065864	0.046577	0.046577	Positive	CW3
Mau2	4	270;558;849;1323	GTCCGGGCCTCGATCCGCTG;GGAAGCCAGCCTTACCCGAA;CATTATTCCTGCTCAGCAAG;GTCAGAGCTGTATTGTCAAG	4	7.11813	4.46156	1.55e-05	0.000461529	0.000398306	Positive	CW3
Mdm4	4	4301;4446;4777;7839	CTTGAGCGATGATACTGACG;GTGTCAGAGCAATTAGGTGT;GAGCAACATATGGTATACTG;ACATCAGCTTCTATTAACAC	4	4.02733	2.40844	0.00420475	0.0335306	0.0335306	Positive	CW3
Mettl14	4	8;11;12;13	ATCAACTTACTACTCTCCCA;GCTGGACCTGGGATGATGTA;GTCCAGTGTCTACAAAATGT;CACTGAACTACTTACATGGG	4	15.1486	9.08745	0	0	0	Positive	CW3
Mettl14	4	8;15;22;28	ATCAACTTACTACTCTCCCA;CACTGAACTACTTACATGGG;GTCCAGTGTCTACAAAATGT;GCTGGACCTGGGATGATGTA	4	13.8157	8.48948	0	0	0	Positive	CR6
Mettl26	4	2487;3558;6201;6514	TGGCGGAGTACGGACAGGAT;GAATGCCGAGTGGCAGCCGT;CTGTGTTCGCGTGCTCGAGG;AACAGGTCCAGCGATCGGGG	4	4.34898	2.50351	0.00197049	0.0182807	0.0181906	Positive	CW3
Mettl3	4	49;56;65;72	TCAGGTGATTACCGTAGAGA;TAGGCACGGGACTATCACTA;AGGTAGCAGGGACCATCGCA;CTGAAGTGCAGCTTGCGACA	4	12.175	7.24395	0	0	0	Positive	CW3
Mettl3	4	57;103;173;433	TCAGGTGATTACCGTAGAGA;TAGGCACGGGACTATCACTA;CTGAAGTGCAGCTTGCGACA;AGGTAGCAGGGACCATCGCA	4	9.05842	5.99751	0	0	0	Positive	CR6
Msto1	4	409;716;2284;20053	GGACAGACTACACTTCTATG;GGGCGGGGAGTCCTAACCTG;CTGTTCTGTACAAGACGTCG;AGCCCCCATACCCATCATGG	3	4.03777	3.01795	0.00410389	0.0330073	0.0328662	Positive	CW3
Naa15	4	139;1268;2207;11241	GCCTGGACTAAATACCCCAG;AATGTGTTCCAAGTTTACGA;ATTCAAATGCGAGATCTTGA;GCTTATGAATTGGTTCGCAG	3	4.08202	3.02402	0.00370049	0.0306846	0.0306846	Positive	CW3
Naca	4	130;312;1398;3952	CACCTACCTGTCTCAGCCTG;ACACACCTGGGCTTGCTGCG;GGGTCTTCGACAGGTTACAG;TGAGTCAGTACCAGAGCTCG	4	5.2171	4.02896	0.000263766	0.00340895	0.00340895	Positive	CW3
Naca	4	276;344;1175;3399	GGGTCTTCGACAGGTTACAG;CACCTACCTGTCTCAGCCTG;TGAGTCAGTACCAGAGCTCG;ACACACCTGGGCTTGCTGCG	4	5.47897	4.04846	0.000162914	0.00423348	0.0039036	Positive	CR6
Ncl	4	1187;1749;2871;6010	CCTCTCTTTCAACATCACTG;TCCTATGAAAGCCAAGAGTG;AGCCAAAGTCATTCCAACAC;TAAAAATGATCTTGCTGTTG	4	4.48887	3.00846	0.00145847	0.0144613	0.0144613	Positive	CW3
Nfrkb	4	385;1448;2791;3801	CATCCTTGCCCTATTCAGTG;GGGTGTTACAGGCGTAACTG;ATATCCGTGGTGGAAAGCGT;AGGACTACCCCAGGTTCGGG	4	5.28478	3.37563	0.000217219	0.00288701	0.00288701	Positive	CW3
Nfrkb	4	68;428;803;1301	CATCCTTGCCCTATTCAGTG;AGGACTACCCCAGGTTCGGG;GGGTGTTACAGGCGTAACTG;ATATCCGTGGTGGAAAGCGT	4	7.14726	4.69305	1.55e-05	0.00073401	0.00066573	Positive	CR6
Nhlrc2	4	607;1143;5834;6368	CCCAAGCGCAACGTCCCACG;GGTGGGTGATGTTGTATCTG;GGTCTCGCTCTCCGCCTACG;AAACAACGCATATCCTCACA	4	4.38836	2.91776	0.00180758	0.0171081	0.0171081	Positive	CW3
Nifk	4	180;217;3649;9452	GGCCCAGATAAACTACTCCA;TCTGCTAATGTCGCCAAACT;AGGCTCTGACGCAGATCCAA;AAGCGCTATAATCGGAAACG	2	4.35349	3.27842	0.00194722	0.0181546	0.0181546	Positive	CW3
Ninj1	4	376;428;554;3446	CACTCCTATCTGCAGCACGA;CGGTTCCGCAAACCCCAGCG;TGCCAACAAGAAGAGCGCTG;GGCCAACGCGTCGCAGCTGA	3	5.87372	4.20617	7.76e-05	0.00118197	0.00116305	Positive	CW3
Nip7	4	108;188;816;1351	GATCTTCTCAAACATGACCC;ACGACCGAGTGTACTATGTG;GAGACAAGCTCGTGTCGCTG;AGAGAACCTTCAACTCCTAG	4	7.08175	4.79938	1.55e-05	0.000447329	0.000398306	Positive	CW3
Nipbl	4	625;1475;2266;7654	GAGCCAAAGCTAACGCCCGA;GGTGAGTCAGAGCGACATCG;CAACAGTCAATAAGCCCGAG;AGGGTAAACTAACCTCCATG	4	4.06882	3.08323	0.00382461	0.0314356	0.0313618	Positive	CW3
Nle1	4	234;389;478;2246	GAACCCCGAGTGCCGCTACG;CTGACTGCGTGTGTCCCGTG;CGTGCCAGTGGACATCACGC;GAGATCCCAGAAGCGCACAG	4	6.19873	4.51158	4.65e-05	0.000918201	0.000881102	Positive	CW3
Nmd3	4	205;743;899;1252	ATAGACCCAAATACCCTACA;AGACCTGCTTTGGAACACCT;TACTGACCTACCTTACTCAG;TAGGTTTCAACATACCTACA	4	7.21395	4.43492	1.55e-05	0.000484606	0.000398306	Positive	CW3
Noc3l	4	247;453;479;8875	TTTATGCCTGCGGATCAAGG;ATTGTCCCTCTGATGAACGA;AAGCAGAAGAGAAACTAGAG;CGAAGCAGAAAAATCTACCA	3	6.06283	3.89667	5.43e-05	0.000951096	0.000951096	Positive	CW3
Nop16	4	201;260;665;1389	GGGACCACACCAAATCCGTG;GTCCCAGGCATGTCGTATGT;GGCTTCCGTACAAGATCCCG;TGTACCGCACATAGTCGATG	4	7.03356	4.7165	1.55e-05	0.000433975	0.000398306	Positive	CW3
Ntmt1	4	1299;2066;3114;61393	CCCGAGCATGCCGTCCACCG;GGTCGACATGGTCGACGTGA;TGACGTGATCTGGATCCAGT;ACTGTGGCGCTGGTATTGGA	3	3.63859	2.42068	0.00820003	0.0560834	0.0560834	Positive	CW3
Nubp2	4	1753;2760;3912;6313	AGAGTTGCCAGTAGTACCTG;AAAGCAGTTTGTGTCTGACG;GCCGTGCACCAGTGTGACAA;GCAGGTGGGAATCCTAGATG	4	4.40343	2.75161	0.00174551	0.0166892	0.0166892	Positive	CW3
Olfr1080	7	995;1031;2654;2673;32636;46154;54763	GCTTGGCGTCTACATTGGTG;AGCAAAGCAACGATATTAAG;AATATTTATGGTGACTACAA;ATGATGACAGTGTAGAGCAG;CCCAAGATTGCCAATCACTG;AACTGTGGGACCAAAAATGT;TCATGTCCCATAAAGTATGT	4	4.39679	2.72897	0.00176103	0.0167521	0.0167521	Positive	CW3
Olfr115	6	438;1256;1332;25888;44044;66041	ACTCTCTATCAGATTCTGTG;GCAGCTGTGTGGCTAAGTGG;GAGAATGGCCATCTCATCCC;TGACCTCATAGTGGAGAGGA;ATGAGAGGTCCAGAATAGAA;TAGCAACTCCAATTGTTACA	3	4.05071	2.66663	0.00398752	0.032349	0.032349	Positive	CW3
Olfr126	7	438;1023;1256;4761;15319;22628;24175	ACTCTCTATCAGATTCTGTG;GAAGTGGCTACATTTCATAT;GCAGCTGTGTGGCTAAGTGG;ATTATGACCTCATAGTGCAG;GAGGGATGAGAGGTCCAGAG;TCCAAAGTAATCATTAGAGC;GATGTCTTATGATCGCTATG	3	3.88986	2.80922	0.00525981	0.0397455	0.0397455	Positive	CW3
Olfr126	7	127;629;2072;5357;7344;9772;59047	ACTCTCTATCAGATTCTGTG;TCCAAAGTAATCATTAGAGC;GCAGCTGTGTGGCTAAGTGG;ATTATGACCTCATAGTGCAG;GAGGGATGAGAGGTCCAGAG;GAAGTGGCTACATTTCATAT;GATGTCTTATGATCGCTATG	5	3.93762	3.05701	0.0048021	0.0456694	0.0456694	Positive	CR6
Olfr128	5	1023;1256;2187;4761;21031	GAAGTGGCTACATTTCATAT;GCAGCTGTGTGGCTAAGTGG;GGGAACTGTCAACATACTGG;ATTATGACCTCATAGTGCAG;ATAAGACATCACTGTAAGAA	4	4.22138	2.94223	0.00255233	0.0222468	0.0222468	Positive	CW3
Olfr1281	4	1049;2878;3144;19948	CAGTTTGGGTGTATTTACTG;TGATCAATATCACTACAAAG;TTAGCTAACAGGAAGTACAT;CTCCAAAGAAATGCACACAG	3	3.62627	2.35321	0.00845604	0.0574153	0.0574153	Positive	CW3
Olfr133	5	648;1264;2176;4426;18343	GTTGCGCTGATTCATTATGA;GAGGAAGTTCCAGCCAAGGA;ACTCTGTACCCCCCATTGTG;AGGCAATTGCAGTGTTACAG;ACATAGGGCTATGGAGACAG	4	4.34619	3.02121	0.00197049	0.0181906	0.0181906	Positive	CW3
Olfr761	6	438;627;1256;4761;19076;34865	ACTCTCTATCAGATTCTGTG;CTGTGGATCCAGTGTTGTGA;GCAGCTGTGTGGCTAAGTGG;ATTATGACCTCATAGTGCAG;ACTGGGGAATTGTGACAGAG;AATCCCCATAAAGCAGGCAA	3	4.12599	3.10894	0.0032738	0.0277607	0.0277607	Positive	CW3
Olfr761	6	127;679;2072;5357;7635;23304	ACTCTCTATCAGATTCTGTG;CTGTGGATCCAGTGTTGTGA;GCAGCTGTGTGGCTAAGTGG;ATTATGACCTCATAGTGCAG;ACTGGGGAATTGTGACAGAG;AATCCCCATAAAGCAGGCAA	5	4.35704	3.28348	0.0019317	0.0221366	0.0221366	Positive	CR6
Pabpc1	4	151;1255;2522;2672	TATAGGTAATGATGGAGGGT;TGGACGAGCTCAGAAAAAAG;CGTACGCGTAGCCCAAGGAG;GCAAGCCAGTACGCATCATG	4	5.89703	3.69252	6.98e-05	0.00109036	0.00107249	Positive	CW3
Pagr1a	4	102;207;360;1538	AAGCAGAGATCCTACCCCGC;TGAAGAGGAGAGATCAGACG;TGTCTCGGCTAGTAAGGCCG;GCGAGCGACGAGCGTGCGGA	4	6.85655	4.99432	2.33e-05	0.000589386	0.000552083	Positive	CW3
Pagr1a	4	64;67;95;415	AAGCAGAGATCCTACCCCGC;TGTCTCGGCTAGTAAGGCCG;TGAAGAGGAGAGATCAGACG;GCGAGCGACGAGCGTGCGGA	4	9.13218	6.29182	0	0	0	Positive	CR6
Pak1ip1	4	158;195;263;269	TATGTACTTCCCTCCACTTG;ACAGGGAGGCAGTGTGCGAG;AGAACATGGAATCTTATAGA;CAACCAGCACTTAATCAGTG	4	9.88536	5.8193	0	0	0	Positive	CW3
Pak1ip1	4	288;1215;1463;11511	CAACCAGCACTTAATCAGTG;ACAGGGAGGCAGTGTGCGAG;AGAACATGGAATCTTATAGA;TATGTACTTCCCTCCACTTG	3	4.61354	3.10871	0.00117143	0.0167542	0.0167542	Positive	CR6
Paxip1	4	55;69;167;170	GCCTTGGTTACGTTCCACGG;AGTCAGTAGTATGTACACAC;TCCTCATAGATGATCAGGCG;GGTCAGAAATACTAGGGACC	4	10.6826	6.5058	0	0	0	Positive	CW3
Paxip1	4	24;39;172;454	GCCTTGGTTACGTTCCACGG;AGTCAGTAGTATGTACACAC;GGTCAGAAATACTAGGGACC;TCCTCATAGATGATCAGGCG	4	8.97615	6.28332	0	0	0	Positive	CR6
Pcyt2	4	1413;1797;2669;23038	GAGGATACGGAACAGGTCAA;GTGTAGGCCGGCGATGACGT;CCGTATGCACACCCACGATG;AGACGGCCGAGACACCTATG	3	3.83698	2.51465	0.00570201	0.0425719	0.0425719	Positive	CW3
Pdcl	4	182;254;408;1039	CAAAAGGTGTGATCAATGAC;GCAGGTGTGGAACTAATGGC;TTTATGAAGATGGCGTCCCA;ACCTCCAGGAGAAAATCAGT	4	7.53791	5.01712	7.76e-06	0.000274305	0.000250658	Positive	CW3
Pdcl	4	139;196;13188;17702	TTTATGAAGATGGCGTCCCA;CAAAAGGTGTGATCAATGAC;GCAGGTGTGGAACTAATGGC;ACCTCCAGGAGAAAATCAGT	2	4.44166	3.29998	0.00160587	0.0197522	0.0194923	Positive	CR6
Pfn1	4	67;137;403;19110	GTCAATGGGCTGACACTTGG;CGAGTCCTTGTAGCCTACGA;CAGTACCGTAATGCTAACGA;TCGACAGCCTTATGGCGGAC	3	6.28751	4.50455	3.88e-05	0.000790118	0.000773307	Positive	CW3
Pgk1	4	317;356;2452;46767	TCAAGAACAGAACATCCCTG;GGACTGCACACCGAGCCCAT;CTTCCTCTACATGAAAGCGG;TAAGGTGCTCAACAACATGG	3	3.94624	3.22481	0.00475555	0.0365242	0.0364938	Positive	CW3
Pgp	4	1925;2310;2785;22224	CAAGACTCGCACGGCCTACG;GCACGGCTAGCCAGTCGCTG;ATGAAACGGCCGTTCTCTAG;AGGCCGTGCCGAACACCTCG	3	3.7822	2.38369	0.00615196	0.0443414	0.0443414	Positive	CW3
Phf5a	4	451;744;2000;17895	GGCCGCCACAGATTACACAC;CAGGGTGCAGGGACGCACGT;AGTAGGCATCGGAGACTCCG;CTCATCACATATGCGGACCA	3	4.20918	3.05016	0.00261439	0.0226822	0.0226822	Positive	CW3
Pkm	4	231;639;805;1407	TTTCTCTCATGGAACCCATG;GGGCAGAGTCAATGTCCAGG;CTTCCTGACTTCATGCACGT;TGAAATAGCACATGCCTGTG	4	7.0112	4.43967	1.55e-05	0.000421396	0.000398306	Positive	CW3
Pkm	4	371;660;854;10016	GGGCAGAGTCAATGTCCAGG;TGAAATAGCACATGCCTGTG;CTTCCTGACTTCATGCACGT;TTTCTCTCATGGAACCCATG	3	5.31153	3.47982	0.000217219	0.00466011	0.00466011	Positive	CR6
Pknox1	4	1883;2057;2180;4233	GAGCCAGGACCGCATCACGT;GCAAGGCCAAGTGGTCACGC;CCAGCATCAGCCCTACAACA;ATTGGGGTCTGAGACTCGAT	4	5.09778	3.16784	0.000349102	0.00427593	0.00427593	Positive	CW3
Plin3	4	1850;2267;5330;6208	GCCAGTGAGTATGCACACCG;GCCATGTCCGAGTCCTCCGG;CATGACTGATTGGACACCGC;CGCACACAGTCCTGACGTGG	4	4.43257	2.6961	0.00164466	0.0160526	0.0160447	Positive	CW3
Plin4	4	417;775;2352;15448	CCTGGACACTACCAAATCTG;GGGGCTGTGAATGTGGCTAA;TGCCTCCTTAGTTCCGACAA;GCTCATTGGTACGAAGGACA	3	3.99993	2.97986	0.00442196	0.0343849	0.0343849	Positive	CW3
Ppa1	4	84;123;126;24951	GGAACAGATTCGCCACATAG;TGAGGGCGAGACCGACTGGA;TGGTGGTTGAGGTTCCACGC;TAGATATTTCTGATGTCGAA	3	7.8008	5.0075	7.76e-06	0.000296697	0.000250658	Positive	CW3
Ppcdc	4	62;66;70;74	CCCTCGATGCCAACACTCTG;CCCACCTCCGCAGGTCAATG;CTTGAGAAGATACTCACCCC;CAGTGACGCTGATGAATGGG	4	12.1274	7.14677	0	0	0	Positive	CW3
Ppcs	4	94;95;210;239	AACTTCAGTAGCGGGCGACG;ATGCAGATAATCCGCCAAAG;ATAGAAATCTGACACTGCCG;GTTCTTGTACCGAGCGCGCT	4	10.0908	6.15589	0	0	0	Positive	CW3
Ppih	4	302;599;2281;2876	GGAGTCGCCAGTATTTACCG;ACGGCAGAGAACTTTAGGTA;TGTTTCTGTTAGGCAAACAG;CCAAAAACCTCCCTTACCTG	4	5.76922	3.7771	9.31e-05	0.00137369	0.00135239	Positive	CW3
Ppp1r10	4	517;518;2341;13323	CAGCCACTTACCTCATCCAA;TGAGCTCTGGAACTTCAACA;GAACTGGACGAAACTGAGCG;GTCGAACCACGCTTCCTGAG	3	4.00597	3.06702	0.00436766	0.0342468	0.0341647	Positive	CW3
Ppp1r10	4	1517;1585;1933;3251	GTCGAACCACGCTTCCTGAG;CAGCCACTTACCTCATCCAA;TGAGCTCTGGAACTTCAACA;GAACTGGACGAAACTGAGCG	4	5.5563	3.39851	0.000147399	0.00399928	0.0039036	Positive	CR6
Ppp4c	4	64;93;232;434	TGAGAGTCGCCAGATTACCC;TAGATCTTCTGTGTGCATGG;TGGACAATTCTATGACCTCA;GACAATTGACCGAAAGCAAG	4	9.05441	5.91061	0	0	0	Positive	CW3
Ppp4c	4	160;751;763;18122	TGAGAGTCGCCAGATTACCC;TGGACAATTCTATGACCTCA;TAGATCTTCTGTGTGCATGG;GACAATTGACCGAAAGCAAG	3	5.45783	3.61212	0.000162914	0.0039036	0.0039036	Positive	CR6
Prpf40a	4	38;40;51;148	GGATAATCCAACGTTCGCAG;ATCTGTGGCATCATTCCATG;TCAAACAAAGGAGTCCCGCT;ACCACACCTACTAATACTGT	4	10.9233	7.11058	0	0	0	Positive	CW3
Prpf40a	4	66;72;81;131	GGATAATCCAACGTTCGCAG;TCAAACAAAGGAGTCCCGCT;ATCTGTGGCATCATTCCATG;ACCACACCTACTAATACTGT	4	11.1353	6.82555	0	0	0	Positive	CR6
Ptar1	4	1653;2558;5113;7191	CTGTAAAACCCAGATGCGAT;GGCGATAGTGAAATCCACTG;ACATCACCAACGCCTTCCGA;GGTTGAGAACAAACTTGGTG	4	4.17722	2.63148	0.00283161	0.0244536	0.0244536	Positive	CW3
Ptbp1	4	121;181;382;604	TGACATGGATGACTCTGGAA;GGTTAACTACTATACATCGG;GCAAGTCCTACTCACCAGCT;CACCTGGTGCAGCACGTCCA	4	8.48022	5.39156	0	0	0	Positive	CW3
Ptbp1	4	102;351;359;3492	TGACATGGATGACTCTGGAA;CACCTGGTGCAGCACGTCCA;GGTTAACTACTATACATCGG;GCAAGTCCTACTCACCAGCT	3	6.4379	4.52483	3.1e-05	0.00119277	0.00119277	Positive	CR6
Ptchd4	4	1335;2772;2776;37812	GGTGACCATCACATCAGAGT;TGGAGCAAAATATTGTCCCC;AGACGTAGAATCCTATTACA;ATTACTGTCTGGAACCACAC	3	3.78637	2.38372	0.00611317	0.044232	0.044232	Positive	CW3
Ptges2	4	1665;2313;5118;6699	AGCGGGTGTTCGGTACACGT;AGCTGCAGGCTGTTCGACAG;ATGAAGGCCATGAATGACCA;GCCGGTGCGCCCTGACTGAG	4	4.30033	2.68238	0.00215668	0.0197152	0.0197152	Positive	CW3
Ptma	4	295;421;645;2402	CAGCTCCGAGATCACCACCA;AAAGCAAAATGAGGAAAATG;GACACTCACAGCGTTCCCAT;GATTGATTCTCCAGGTGAGG	4	6.08208	4.34307	5.43e-05	0.000978531	0.000951096	Positive	CW3
Ptma	4	138;148;215;691	AAAGCAAAATGAGGAAAATG;GACACTCACAGCGTTCCCAT;CAGCTCCGAGATCACCACCA;GATTGATTCTCCAGGTGAGG	4	8.24646	5.54952	0	0	0	Positive	CR6
Ptpa	4	412;561;652;2591	TGTGCCATAGTCAATTCGTG;TTCTTGATACGCTGGATAGG;CAATCTTGCAGAGACAACAG;ACAGGTATCTTGAGGTTATG	4	5.9505	4.20892	6.21e-05	0.000985639	0.000985639	Positive	CW3
Ptprm	4	5910;5936;6168;6260	CAAAATTGACTGTGTCCGAG;AGAGCCGACACAAACATATG;TAAAAAATAGATCCCATGCG;GTAGTGAAAGTCGATGCAGT	4	4.41807	2.33903	0.00168345	0.0161784	0.0161784	Positive	CW3
Puf60	4	497;658;3469;6248	ATGTTTAAGGTTAATACCTG;AGATGGAGCCCACATAGACC;AGACAGGTCTTGATGTACAG;CAAGAGCATTGATATGTCCT	4	4.42141	3.23175	0.00168345	0.0162618	0.0161784	Positive	CW3
Pycrl	4	335;1460;1591;8744	ACCGGTGTGGATATCTACGT;CGCAATACTCGTGTGTTCGG;GACTACTCACTCCAACCATG;TGAGCACATCATCGTATCTG	3	4.50497	2.99862	0.0014352	0.0143062	0.0143062	Positive	CW3
Rabl6	4	1429;2676;3022;10657	TGTTTGACATCACTAAGCAG;CCAGTGAAGATTGTGATCCG;TCATGGAAGATTCAGCATAG;TAAGGAAAGTGTAAAAAACG	3	3.67714	2.34783	0.00757164	0.0533431	0.0531977	Positive	CW3
Rabl6	4	291;476;1290;50730	TAAGGAAAGTGTAAAAAACG;CCAGTGAAGATTGTGATCCG;TGTTTGACATCACTAAGCAG;TCATGGAAGATTCAGCATAG	3	4.77654	3.43016	0.000799057	0.0126005	0.0126005	Positive	CR6
Rad21	4	912;1110;2159;16122	TAATGCCATTACTTTACCTG;GTGGAATAACCGGCTACTGA;ATGCTTCATTACAGTCTGCG;GACAACTCTCGTCCCAAACG	3	4.1104	2.80334	0.00345224	0.0291418	0.0291415	Positive	CW3
Rad21	4	214;229;974;4921	GTGGAATAACCGGCTACTGA;TAATGCCATTACTTTACCTG;GACAACTCTCGTCCCAAACG;ATGCTTCATTACAGTCTGCG	3	5.14089	4.06401	0.000318071	0.00637871	0.00637871	Positive	CR6
Rbbp5	4	197;238;310;427	CGATGACTCGGATTTGAACG;AAACTCAATTGATTTAATGG;TCTTAAACATACTGATCTCG;CCTTACCACAAAGAACAGAC	4	9.08266	5.49819	0	0	0	Positive	CW3
Rbbp5	4	69;585;1764;17297	AAACTCAATTGATTTAATGG;TCTTAAACATACTGATCTCG;CGATGACTCGGATTTGAACG;CCTTACCACAAAGAACAGAC	3	4.37145	3.44296	0.00183085	0.0213792	0.0213792	Positive	CR6
Rbm22	4	287;594;835;1063	CAGACCGCCGACGTACAGGG;CTGATGGAACACGACCAGTT;TTAGAAGCTTGTCAGCCACG;GACACGTCTGACACAGAATG	4	7.49824	4.54195	7.76e-06	0.000269225	0.000250658	Positive	CW3
Rbm25	4	42;110;159;246	TTTCTGAAGAGCACTACCCC;GCTCAGATCGAAATAAGGAT;CATGCAATAATCTGAGAGCA;GAGTGGGTAAGGGATCAATG	4	10.0406	6.28936	0	0	0	Positive	CW3
Rbm25	4	71;104;228;33696	GCTCAGATCGAAATAAGGAT;TTTCTGAAGAGCACTACCCC;GAGTGGGTAAGGGATCAATG;CATGCAATAATCTGAGAGCA	3	7.02866	4.8229	1.55e-05	0.000698205	0.00066573	Positive	CR6
Rhox4a	19	525;774;932;2102;2693;5949;6546;7079;12948;14287;17589;22882;23769;31319;40744;47866;47924;54337;70080	GGACACCAGTGGCAGTGCCC;CAGGCAGTCTTACCACTGGA;ACCAACTACCTACTTCATGA;CAGTGCTGGTATCTGGTGTG;GCCAGTTCTCAAGGATGCTG;TTTCTTCCCTCTCCATCCAG;TGCTGTACCCACACTGACTT;CCAGATACCAGCACTGGAAT;GGAGAAGGTGGGCCTGCTGC;ACTTCATGAGGGACTTGGCA;ATGAATGATGACGCCTCTGT;TTTGTCCCCTTCCACTGCTG;CCACTGCTGCGGCTCCGGAC;TCCTTGAGAACTGGCTCCTC;CGGAGCCGCAGCAGTGGAAG;AATGAATGATGACGCCTCTG;TGAATGATGACGCCTCTGTG;ACATACAGGTGGGAAGACAC;AAGGACAAGGAAAATTTGAA	8	3.9753	2.77331	0.00457712	0.0354443	0.0354443	Positive	CW3
Rhox4a	19	417;659;1496;1640;1645;2340;2846;3358;3449;4018;5439;12976;15729;18197;35801;38418;38614;54191;59890	TCCTTGAGAACTGGCTCCTC;GCCAGTTCTCAAGGATGCTG;CGGAGCCGCAGCAGTGGAAG;GGACACCAGTGGCAGTGCCC;CAGGCAGTCTTACCACTGGA;TTTCTTCCCTCTCCATCCAG;ATGAATGATGACGCCTCTGT;CAGTGCTGGTATCTGGTGTG;ACTTCATGAGGGACTTGGCA;CCACTGCTGCGGCTCCGGAC;GGAGAAGGTGGGCCTGCTGC;AAGGACAAGGAAAATTTGAA;ACATACAGGTGGGAAGACAC;CCAGATACCAGCACTGGAAT;ACCAACTACCTACTTCATGA;AATGAATGATGACGCCTCTG;TGCTGTACCCACACTGACTT;TTTGTCCCCTTCCACTGCTG;TGAATGATGACGCCTCTGTG	10	8.20763	4.90008	0	0	0	Positive	CR6
Rhox4b	16	525;932;1229;2102;5009;5949;6546;7079;10721;10991;12050;12948;14287;23332;23769;58000	GGACACCAGTGGCAGTGCCC;ACCAACTACCTACTTCATGA;GACACAGACAGTCTTACCAC;CAGTGCTGGTATCTGGTGTG;TTTGTCCCATTCCACTGCTG;TTTCTTCCCTCTCCATCCAG;TGCTGTACCCACACTGACTT;CCAGATACCAGCACTGGAAT;GCCAGTTCTCAGGGATGCTG;CGGAGCCGCAGCAGTGGAAT;CAGACAGTCTTACCACTGGA;GGAGAAGGTGGGCCTGCTGC;ACTTCATGAGGGACTTGGCA;TCCCTGAGAACTGGCTCCTC;CCACTGCTGCGGCTCCGGAC;AAGGACAAGGAAAAGTTGAA	8	4.62284	2.90112	0.00115592	0.0121016	0.0121016	Positive	CW3
Rhox4b	16	1035;1640;1806;2340;3358;3449;4018;5439;15593;18197;25106;29332;30443;35801;37319;38614	CGGAGCCGCAGCAGTGGAAT;GGACACCAGTGGCAGTGCCC;GACACAGACAGTCTTACCAC;TTTCTTCCCTCTCCATCCAG;CAGTGCTGGTATCTGGTGTG;ACTTCATGAGGGACTTGGCA;CCACTGCTGCGGCTCCGGAC;GGAGAAGGTGGGCCTGCTGC;TTTGTCCCATTCCACTGCTG;CCAGATACCAGCACTGGAAT;TCCCTGAGAACTGGCTCCTC;AAGGACAAGGAAAAGTTGAA;CAGACAGTCTTACCACTGGA;ACCAACTACCTACTTCATGA;GCCAGTTCTCAGGGATGCTG;TGCTGTACCCACACTGACTT	8	5.46081	3.26482	0.000162914	0.00395496	0.0039036	Positive	CR6
Rhox4c	16	525;774;932;2102;2693;5949;6546;7079;12948;14287;22882;23769;31319;40744;54337;58000	GGACACCAGTGGCAGTGCCC;CAGGCAGTCTTACCACTGGA;ACCAACTACCTACTTCATGA;CAGTGCTGGTATCTGGTGTG;GCCAGTTCTCAAGGATGCTG;TTTCTTCCCTCTCCATCCAG;TGCTGTACCCACACTGACTT;CCAGATACCAGCACTGGAAT;GGAGAAGGTGGGCCTGCTGC;ACTTCATGAGGGACTTGGCA;TTTGTCCCCTTCCACTGCTG;CCACTGCTGCGGCTCCGGAC;TCCTTGAGAACTGGCTCCTC;CGGAGCCGCAGCAGTGGAAG;ACATACAGGTGGGAAGACAC;AAGGACAAGGAAAAGTTGAA	8	4.62284	3.11234	0.00115592	0.0121016	0.0121016	Positive	CW3
Rhox4c	16	417;659;1496;1640;1645;2340;3358;3449;4018;5439;15729;18197;29332;35801;38614;54191	TCCTTGAGAACTGGCTCCTC;GCCAGTTCTCAAGGATGCTG;CGGAGCCGCAGCAGTGGAAG;GGACACCAGTGGCAGTGCCC;CAGGCAGTCTTACCACTGGA;TTTCTTCCCTCTCCATCCAG;CAGTGCTGGTATCTGGTGTG;ACTTCATGAGGGACTTGGCA;CCACTGCTGCGGCTCCGGAC;GGAGAAGGTGGGCCTGCTGC;ACATACAGGTGGGAAGACAC;CCAGATACCAGCACTGGAAT;AAGGACAAGGAAAAGTTGAA;ACCAACTACCTACTTCATGA;TGCTGTACCCACACTGACTT;TTTGTCCCCTTCCACTGCTG	10	7.93656	4.80747	7.76e-06	0.000461716	0.000397589	Positive	CR6
Rhox4d	16	525;932;1229;2102;5009;5949;6546;7079;10721;10991;12050;12948;14287;23332;23769;70080	GGACACCAGTGGCAGTGCCC;ACCAACTACCTACTTCATGA;GACACAGACAGTCTTACCAC;CAGTGCTGGTATCTGGTGTG;TTTGTCCCATTCCACTGCTG;TTTCTTCCCTCTCCATCCAG;TGCTGTACCCACACTGACTT;CCAGATACCAGCACTGGAAT;GCCAGTTCTCAGGGATGCTG;CGGAGCCGCAGCAGTGGAAT;CAGACAGTCTTACCACTGGA;GGAGAAGGTGGGCCTGCTGC;ACTTCATGAGGGACTTGGCA;TCCCTGAGAACTGGCTCCTC;CCACTGCTGCGGCTCCGGAC;AAGGACAAGGAAAATTTGAA	8	4.62284	2.90112	0.00115592	0.0121016	0.0121016	Positive	CW3
Rhox4d	16	1035;1640;1806;2340;3358;3449;4018;5439;12976;15593;18197;25106;30443;35801;37319;38614	CGGAGCCGCAGCAGTGGAAT;GGACACCAGTGGCAGTGCCC;GACACAGACAGTCTTACCAC;TTTCTTCCCTCTCCATCCAG;CAGTGCTGGTATCTGGTGTG;ACTTCATGAGGGACTTGGCA;CCACTGCTGCGGCTCCGGAC;GGAGAAGGTGGGCCTGCTGC;AAGGACAAGGAAAATTTGAA;TTTGTCCCATTCCACTGCTG;CCAGATACCAGCACTGGAAT;TCCCTGAGAACTGGCTCCTC;CAGACAGTCTTACCACTGGA;ACCAACTACCTACTTCATGA;GCCAGTTCTCAGGGATGCTG;TGCTGTACCCACACTGACTT	8	5.46081	3.26482	0.000162914	0.00395496	0.0039036	Positive	CR6
Rhox4e	16	525;774;932;2102;5009;5949;6546;7079;10721;10991;12948;14287;23332;23769;54337;70080	GGACACCAGTGGCAGTGCCC;CAGGCAGTCTTACCACTGGA;ACCAACTACCTACTTCATGA;CAGTGCTGGTATCTGGTGTG;TTTGTCCCATTCCACTGCTG;TTTCTTCCCTCTCCATCCAG;TGCTGTACCCACACTGACTT;CCAGATACCAGCACTGGAAT;GCCAGTTCTCAGGGATGCTG;CGGAGCCGCAGCAGTGGAAT;GGAGAAGGTGGGCCTGCTGC;ACTTCATGAGGGACTTGGCA;TCCCTGAGAACTGGCTCCTC;CCACTGCTGCGGCTCCGGAC;ACATACAGGTGGGAAGACAC;AAGGACAAGGAAAATTTGAA	8	4.62284	2.96215	0.00115592	0.0121016	0.0121016	Positive	CW3
Rhox4e	16	1035;1640;1645;2340;3358;3449;4018;5439;12976;15593;15729;18197;25106;35801;37319;38614	CGGAGCCGCAGCAGTGGAAT;GGACACCAGTGGCAGTGCCC;CAGGCAGTCTTACCACTGGA;TTTCTTCCCTCTCCATCCAG;CAGTGCTGGTATCTGGTGTG;ACTTCATGAGGGACTTGGCA;CCACTGCTGCGGCTCCGGAC;GGAGAAGGTGGGCCTGCTGC;AAGGACAAGGAAAATTTGAA;TTTGTCCCATTCCACTGCTG;ACATACAGGTGGGAAGACAC;CCAGATACCAGCACTGGAAT;TCCCTGAGAACTGGCTCCTC;ACCAACTACCTACTTCATGA;GCCAGTTCTCAGGGATGCTG;TGCTGTACCCACACTGACTT	8	5.46081	3.27856	0.000162914	0.00395496	0.0039036	Positive	CR6
Rhox4f	15	525;932;1229;2102;2693;5949;6546;7079;12050;12948;22882;31319;58000;71189;76112	GGACACCAGTGGCAGTGCCC;ACCAACTACCTACTTCATGA;GACACAGACAGTCTTACCAC;CAGTGCTGGTATCTGGTGTG;GCCAGTTCTCAAGGATGCTG;TTTCTTCCCTCTCCATCCAG;TGCTGTACCCACACTGACTT;CCAGATACCAGCACTGGAAT;CAGACAGTCTTACCACTGGA;GGAGAAGGTGGGCCTGCTGC;TTTGTCCCCTTCCACTGCTG;TCCTTGAGAACTGGCTCCTC;AAGGACAAGGAAAAGTTGAA;CCAGTCCGGAGCCACAGCAG;TGAGGGACTTGTCAAGGACA	8	4.88344	3.18459	0.0006439	0.00722556	0.00722556	Positive	CW3
Rhox4f	15	417;659;1640;1806;2340;3358;5439;18197;25412;29332;30443;35801;38614;54191;73583	TCCTTGAGAACTGGCTCCTC;GCCAGTTCTCAAGGATGCTG;GGACACCAGTGGCAGTGCCC;GACACAGACAGTCTTACCAC;TTTCTTCCCTCTCCATCCAG;CAGTGCTGGTATCTGGTGTG;GGAGAAGGTGGGCCTGCTGC;CCAGATACCAGCACTGGAAT;CCAGTCCGGAGCCACAGCAG;AAGGACAAGGAAAAGTTGAA;CAGACAGTCTTACCACTGGA;ACCAACTACCTACTTCATGA;TGCTGTACCCACACTGACTT;TTTGTCCCCTTCCACTGCTG;TGAGGGACTTGTCAAGGACA	6	4.71907	3.28782	0.000907666	0.01384	0.01384	Positive	CR6
Rhox4g	16	525;774;932;2102;5949;6546;7079;10721;12948;14287;22882;23332;23769;40744;54337;58000	GGACACCAGTGGCAGTGCCC;CAGGCAGTCTTACCACTGGA;ACCAACTACCTACTTCATGA;CAGTGCTGGTATCTGGTGTG;TTTCTTCCCTCTCCATCCAG;TGCTGTACCCACACTGACTT;CCAGATACCAGCACTGGAAT;GCCAGTTCTCAGGGATGCTG;GGAGAAGGTGGGCCTGCTGC;ACTTCATGAGGGACTTGGCA;TTTGTCCCCTTCCACTGCTG;TCCCTGAGAACTGGCTCCTC;CCACTGCTGCGGCTCCGGAC;CGGAGCCGCAGCAGTGGAAG;ACATACAGGTGGGAAGACAC;AAGGACAAGGAAAAGTTGAA	7	3.66331	2.61974	0.00778886	0.0544639	0.0543695	Positive	CW3
Rhox4g	16	1496;1640;1645;2340;3358;3449;4018;5439;15729;18197;25106;29332;35801;37319;38614;54191	CGGAGCCGCAGCAGTGGAAG;GGACACCAGTGGCAGTGCCC;CAGGCAGTCTTACCACTGGA;TTTCTTCCCTCTCCATCCAG;CAGTGCTGGTATCTGGTGTG;ACTTCATGAGGGACTTGGCA;CCACTGCTGCGGCTCCGGAC;GGAGAAGGTGGGCCTGCTGC;ACATACAGGTGGGAAGACAC;CCAGATACCAGCACTGGAAT;TCCCTGAGAACTGGCTCCTC;AAGGACAAGGAAAAGTTGAA;ACCAACTACCTACTTCATGA;GCCAGTTCTCAGGGATGCTG;TGCTGTACCCACACTGACTT;TTTGTCCCCTTCCACTGCTG	8	5.46081	3.26336	0.000162914	0.00395496	0.0039036	Positive	CR6
Rif1	4	700;857;2137;2271	GCACAAAAAGTACATTTGCG;AACCTGAGTTCAAATACAGG;AACGCCGCCTCGAAGACCGT;ATCTATTCCACAGTTCTCCG	4	6.1795	3.73401	4.65e-05	0.000890092	0.000881102	Positive	CW3
Rnf151	4	2062;2546;5399;5790	GAGCTACCTTGACTTGTAGG;GCACAGTGCAACCCTCATTG;GGGTGGACCCACAGCCTAAG;CCTGTGTTCTGTCTGCCATG	4	4.55366	2.68697	0.00130332	0.013274	0.0131313	Positive	CW3
Rpl10	4	147;169;507;580	CCTGATCTAGGCTCCAGACA;TATGAGCAACTCTCTTCTGA;CATGGTAAAGAGTTGTGGCA;ACTACTTACCAGGGACACCA	4	8.55066	5.31096	0	0	0	Positive	CW3
Rpl10a	4	21;35;80;105	AAGAAGTTGGTCAAGAAGCT;GGCCGTGGATATCCCCCACA;ACGCGACACCCTGTACGAGG;CTGCTTAATCAGAGACTCAG	4	11.5196	7.20636	0	0	0	Positive	CW3
Rpl10a	4	87;111;117;6410	AAGAAGTTGGTCAAGAAGCT;GGCCGTGGATATCCCCCACA;ACGCGACACCCTGTACGAGG;CTGCTTAATCAGAGACTCAG	3	7.8973	4.89244	7.76e-06	0.000433733	0.000397589	Positive	CR6
Rpl11	4	678;1315;2213;48834	CTCACCTTTGGAGAACACCG;AATTCAAGAACACATTGACC;CTGCCTCAATATCTGCGTCG;GGGAAAAGGAGAACCCCATG	3	4.07851	2.78603	0.00374703	0.0309337	0.0309337	Positive	CW3
Rpl13	4	947;2535;3077;49461	GGAACAGGATGAGCTTGGAG;TACCTGCGGATCTTGCGCGC;GGCTGGCATCCACAAGAAAG;CACTGTAGGGCACCTCACGA	3	3.65395	2.41213	0.00792075	0.054773	0.054773	Positive	CW3
Rpl14	4	252;682;960;1553	GGGTCCATCCACTAAAGCCT;GAAAATTGATGCCAGAGAAA;TGTCCGAAAAGCTTGGGAGA;AGAACAAGGTGTTACCTGTG	4	6.83969	4.31626	2.33e-05	0.000581527	0.000552083	Positive	CW3
Rpl15	4	402;406;21705;62316	CTGGGATACAAGGCTAAGCA;GGCGTTTACGACCACCACGG;GCTGGCGGTATTGCCAACAG;TCAGCTGGTTAACACCATGG	2	3.81142	2.75641	0.00587268	0.0433283	0.0429923	Positive	CW3
Rpl18	4	193;808;2505;19257	TGGCTGACTACTAACCATGC;TTACCTTGACAAGCAGCCGC;TCGCCACAACAAGGACCGAA;TGTGACCGTCCCCACAACCA	3	3.91868	3.05113	0.00493398	0.0374343	0.0374343	Positive	CW3
Rpl19	4	692;830;1868;64129	GGAAAAACACCCTGGCCCGA;AAGTGGGAGCTTACATATGG;TCTTGCTCAGGGAAGAGGAA;CAGATCATACTCACGGGAGT	3	4.2974	2.98756	0.00217995	0.0198312	0.0198312	Positive	CW3
Rpl23	4	304;348;9915;10115	AGCTCCGACCGGAAGACCCA;AATCCGGAATTTCGCCCCGG;CTGTGCAGACAACACAGGTG;GTCCTTAGTACATCCAGCAG	2	3.94468	2.88291	0.00477107	0.0364938	0.0364938	Positive	CW3
Rpl24	4	99;288;1365;1466	CTACGCCAGGACCGACGGGA;CAGCGGGTACAAGATCTACC;ATGCACCAGTGATGGCTCGT;ACAGTCCAGTTTATCTGCCG	4	6.93984	4.51415	1.55e-05	0.000409526	0.000398306	Positive	CW3
Rpl26	4	821;842;1795;2906	AACTTCGTCATCCTTCCGAA;ATGCGCCCTCTCACATTCGG;GTTGTTCGCGGACACTACAA;CGAACGAGTCCAGCGAGAGA	4	5.75119	3.67024	9.31e-05	0.00135239	0.00135239	Positive	CW3
Rpl3	4	176;327;371;3671	CAGAGAAGGCAACACGGGCA;TTAGGTGCTTACCTGAGTGT;TGTGGAAACTCCCCCAATGG;AAGCGCAGCAGCCGGCATCG	3	6.39513	4.44882	3.1e-05	0.000653401	0.000646141	Positive	CW3
Rpl32	4	185;330;571;19199	ACCAAGCACATGCTGCCCAG;CCACAATGTCAAGGAGCTGG;GAGGCATTGACAACAGGGTG;TGTGTCTTCAGCGAAACTGG	3	5.83444	3.95331	7.76e-05	0.00116305	0.00116305	Positive	CW3
Rpl35a	4	192;298;878;27405	TTGTCTTAGGCTGTGGTGCA;GATGAAACGGAGTTCTACTT;ACCAGCAATACAGTGACTCC;AACAAAACCAGAGTGATCTG	3	5.27555	3.7911	0.000232735	0.00307145	0.00307145	Positive	CW3
Rpl36	4	299;2628;3068;11402	GAGACACAGCCGGCGACGCG;CAAACACACCAAGTTCGTGC;GCGGCTTCGCACCCTACGAG;GACATGATCCGGGAGGTGTG	3	3.65772	2.56664	0.0078742	0.0546528	0.0546528	Positive	CW3
Rpl36al	4	439;1988;2822;30914	GACCCAGTATAAGAAGGGCA;CGCTACGATCGCAAGCAGAG;TCAACGTACCAAAAACCCGA;CCACAAAGAAGATTGTGCTC	3	3.76522	2.62605	0.00640797	0.0458341	0.0458341	Positive	CW3
Rpl37	4	944;978;1017;25430	AAGTCGACTTGTGGCAAGTG;CACAAGTCGACTTCTGAAGG;CTTACACTTCCTCTTGCGCT;ATTAGATAACTGGAGTGCCA	3	5.08484	3.15951	0.000364618	0.00443698	0.00443698	Positive	CW3
Rpl37a	4	608;2119;3057;32570	TCCGGAGGGAGGCACCATAG;CACTTGCTCCTTCTGTGGCA;GCCGTCGGCATCTGGCACTG;ACAGGCTAAACGCACCAAGA	3	3.66233	2.52755	0.00780438	0.0543695	0.0543695	Positive	CW3
Rpl37rt	2	944;978	AAGTCGACTTGTGGCAAGTG;CACAAGTCGACTTCTGAAGG	2	3.82151	2.72589	0.00581837	0.0430974	0.0429923	Positive	CW3
Rpl38	4	77;122;504;1629	ACTTTCTGCTGACAGCCCGG;TGTCAAGATCAAGAAGAACA;GTTACAGCCTCGGAAAATTG;CAGCAGGTACCTTTACACCC	4	6.75669	5.00496	2.33e-05	0.000573875	0.000552083	Positive	CW3
Rpl4	4	230;357;476;7694	GTTAGGTCATCGTATTGAGG;AGAAAACAGATGTGTCGTGG;GCAAAATGAGAAACCGACGG;GCTGTATGGCACTTGGCGGA	3	6.071	3.99861	5.43e-05	0.000969212	0.000951096	Positive	CW3
Rpl6	4	104;904;2241;69385	ATCCTCACTGGGCGCCACAG;TTCCGAGGAACATCTTCGGT;GTTGGTGGGGACAAGAACGG;ACAGGGTTTCGGCTGCAATG	3	4.06229	3.15587	0.00385564	0.0314151	0.0314151	Positive	CW3
Rpl7	4	485;1071;1208;1647	TGGAGCCATACATTGCATGG;CCTTTGTCATCAGAATTCGA;TTAAGAAAAAGGTTCCTGCT;GAAGGCAAAGCACTATCACA	4	6.7376	4.04918	2.33e-05	0.000566422	0.000552083	Positive	CW3
Rpl7a	4	294;794;1153;74361	ACCTCACACCTACCTCAATG;GGAAGCACTGACCTGCTCGG;CGCTGCAGTCTGATGTAGCG;TGAACTGGTTAATGGCAGGA	3	4.92207	3.33022	0.00057408	0.00655991	0.00655991	Positive	CW3
Rpl7l1	4	225;259;351;1022	GAGTGTAAGAATGCTGCGCA;CTGGCGACAGCAACGTGACA;CCTTTCCATGCGTATAACGA;AAATCTTCTGAAAAAGAGGA	4	7.56657	5.04615	7.76e-06	0.00027958	0.000250658	Positive	CW3
Rpl8	4	383;758;818;72476	GACTGTGGCGTAGTTCCCGG;CAACACACGATCGTACCCTC;GCGCACGTGAAGCACCGTAA;TAGGACATCATTCATGACCC	3	5.36744	3.45419	0.000193946	0.0025961	0.0025961	Positive	CW3
Rpl9	4	273;866;1640;9924	ACTGCAGATGGTCCTGACGG;CTGTCCTCATCCGAACCCTG;AGGGCTTCCGATACAAGATG;GGACTTCAATCACATCAACG	3	4.46573	3.16386	0.00155157	0.0153033	0.0153033	Positive	CW3
Rplp0	4	306;521;1561;2222	CAGATCCGCATGTCGCTCCG;GCATATCCCGAATCTCAGTG;ATCAGCTGCACATCACTCTG;ATGATGCGCAAGGCTATCAG	4	6.2174	4.04035	3.88e-05	0.000773307	0.000773307	Positive	CW3
Rplp1	4	203;696;2200;66322	CTTACCTTGGCAAACAAGCC;GGGCATTGATCTTATCCTCC;CCTCATCCTGCACGACGACG;GAGGCTCCCAATGTTGACAT	3	4.08612	3.14247	0.00367721	0.0306271	0.0306271	Positive	CW3
Rplp2	4	243;384;6085;44435	AAGAAAATACTAGACAGCGT;TAGGAGAGGAGTTGCCCCCG;TTCAGCTCACTGATGACCTG;GCTGAATGGAAAGAACATTG	2	3.85957	2.85331	0.00552358	0.041571	0.041571	Positive	CW3
Rreb1	4	1812;3410;5592;6949	GCGGATGTGACGGATCAGGG;CAGCACAACACAGACACGGG;GGTGTGAGACAAACCTACGG;CCCTACTCTGCTGAAAACGA	4	4.23668	2.54856	0.00249026	0.022013	0.022013	Positive	CW3
Rreb1	4	2167;4588;6054;6231	GGTGTGAGACAAACCTACGG;GCGGATGTGACGGATCAGGG;CCCTACTCTGCTGAAAACGA;CAGCACAACACAGACACGGG	4	4.42614	2.49176	0.00166793	0.0198538	0.0198538	Positive	CR6
Rsl1d1	4	399;422;440;12069	TCTGTCCAGCTGTAAAAGAG;AAAATGCCTCCCTATGTGTG;ACGATCCGTATTGGTCACAC;GCTTTCAGAAAAATTGCCAG	3	6.17327	3.8853	4.65e-05	0.000881102	0.000881102	Positive	CW3
Rsl24d1	4	468;663;848;2887	AGCTGGCAAGGAGCTCACGG;GCCTCACCTTGCAATCGTTG;GAAGAAGAGAAACCCACGCA;GCTCCGGGCCGATCTACCCG	4	5.76259	4.027	9.31e-05	0.00136295	0.00135239	Positive	CW3
Sbds	4	189;200;602;661	CCAGATCCGACTGACCAATG;TAGGGATATCGCCACCATTG;CCTTCATGGCTCTCTCGATG;ACTGAAATCTGCAAGCAGGT	4	8.32357	5.13478	0	0	0	Positive	CW3
Sbp	5	1867;2928;4997;6170;24283	TCACTCTGGGCTCTGCATGT;GGTCGATACTTCAGTGACAC;GGACTGATGTCTATGGAACC;CTGACCTTCACTACAAACAA;CACTACAAACAAGGGGCGTG	4	3.77929	2.33319	0.00620626	0.0445615	0.0445615	Positive	CW3
Sdad1	4	124;129;573;1105	TCTGGGGAAGTCATGACCGT;GGTGCGGCCTTCCTACCATG;AGTGACTCAGAATCCGAGGT;CAAGAACAACAAAGTGAACG	4	7.43092	5.06818	7.76e-06	0.00026433	0.000250658	Positive	CW3
Sec23b	4	921;1141;1521;4099	AAAAGTGATGAGACCAACCA;GTGTTGGTGGCACAAGTCAG;AATGGCGTTTGGTGCTACGT;GCAACACCAGTGGACCGCAG	4	5.15366	3.4972	0.000318071	0.00397377	0.00394745	Positive	CW3
Sec62	4	101;125;145;787	TGGCCAGCAGAAATGAGAGT;GGACGCTTTATTTACAACCA;AACCCGATGACCCATCATGT;TGTTTGTAGGAGGAAACTCC	4	8.02047	5.69158	7.76e-06	0.000323071	0.000250658	Positive	CW3
Sec62	4	37;50;55;1065	TGGCCAGCAGAAATGAGAGT;AACCCGATGACCCATCATGT;GGACGCTTTATTTACAACCA;TGTTTGTAGGAGGAAACTCC	3	8.88043	6.18337	0	0	0	Positive	CR6
Sf1	4	54;321;387;9679	GCAGGGTATTGAGACCCCAG;ACGCCAAGATCATGATTCGG;TGAACCAATCTACAACAGCG;CCCTACCATGGCATGCATGG	3	6.3402	4.30742	3.1e-05	0.000646141	0.000646141	Positive	CW3
Sf1	4	106;217;459;1523	TGAACCAATCTACAACAGCG;ACGCCAAGATCATGATTCGG;GCAGGGTATTGAGACCCCAG;CCCTACCATGGCATGCATGG	4	6.87357	4.9052	1.55e-05	0.00066573	0.00066573	Positive	CR6
Sf3a1	4	88;183;1514;41701	CATTATTTACCCTCCCCCGG;GGATACTCAAGTACAGGACA;GCTGGTGGAGCAGTATACCA;GCGACGTACTGACATCTTTG	3	4.56918	3.80877	0.00129556	0.01334	0.0131313	Positive	CW3
Sf3a2	4	171;293;15809;16994	GCAGACATGAAACGGTGGCG;GGAAACCATTGACATCAACA;GCTACCTGGCCCATACCCAA;GCCAAGCCGGGAGATTGACA	2	4.0935	3.08117	0.00360739	0.0301797	0.0301797	Positive	CW3
Sf3a3	4	177;291;314;1690	CAATTCCGATCACCGCACTC;ATAGAATTCAGCGAACTCGT;ATGTGTGATTCCTTCAGACT;TTTCAACCTATCCAGACCCA	4	6.69283	4.86459	3.1e-05	0.000726909	0.000646141	Positive	CW3
Sf3a3	4	268;322;19940;23293	ATGTGTGATTCCTTCAGACT;TTTCAACCTATCCAGACCCA;ATAGAATTCAGCGAACTCGT;CAATTCCGATCACCGCACTC	2	4.01184	2.94357	0.00434439	0.0424095	0.0424095	Positive	CR6
Sf3b1	4	140;187;1819;2766	AAACCAGTCATACCACCCAA;TATCATTAAGCAACGCCACG;TAATCTTCATCAATCAACAG;ACTCCTCGAACAGATCGAGG	4	5.83696	4.20158	7.76e-05	0.00117243	0.00116305	Positive	CW3
Sf3b2	4	362;442;844;964	TCGTCCTATAGGGAGTCGCG;CACTCCAGGGTCTTACCGCG;GATAGAAAAACCGAAAGCGT;ACTTGCGCTTAAAACACCAG	4	7.66806	4.61979	7.76e-06	0.000285062	0.000250658	Positive	CW3
Sf3b3	4	115;208;712;49187	GGCATGGCAGACGAAAACTC;ATGGCGTTTAGGCTAACAGG;GAACACTCTGGTGTATCACG;AAAGCCCGATGCAAATTCCA	3	5.54768	4.05936	0.000155157	0.00220275	0.0021538	Positive	CW3
Sf3b3	4	129;150;5709;13668	GGCATGGCAGACGAAAACTC;ATGGCGTTTAGGCTAACAGG;GAACACTCTGGTGTATCACG;AAAGCCCGATGCAAATTCCA	2	4.67349	3.24263	0.00102403	0.0151147	0.0151084	Positive	CR6
Sf3b5	4	107;150;456;51247	GCAGTCCAAGTACATCGGCA;CCACGCCGACACCACCAAGT;GAGGTCGAAGTGGCCCATGT;TGTAGGAGCAGTAGGAGTCG	3	6.12682	4.35724	5.43e-05	0.00101767	0.000951096	Positive	CW3
Sf3b5	4	163;174;10850;68088	GAGGTCGAAGTGGCCCATGT;CCACGCCGACACCACCAAGT;GCAGTCCAAGTACATCGGCA;TGTAGGAGCAGTAGGAGTCG	2	4.54484	3.31718	0.00131883	0.0176322	0.0176322	Positive	CR6
Sgf29	4	1318;1567;2479;4662	CCAGGTTTCCCGATCCAGAG;CACAACCGCCAAGACTGATG;TTTGGCCACATAGTCCCCTG;TCAGCTGATCAAGCAAACCC	4	4.93008	3.17856	0.000550806	0.00637167	0.00637167	Positive	CW3
Shoc2	4	2140;2872;4825;6634	ACATACCTATTGTATCTGGG;CATGTTGAGGGAATAAATGG;TAACATTTCTACTCTACCAG;ATTATGTAACCTCATTACCC	4	4.31727	2.63471	0.0020791	0.0190992	0.0190992	Positive	CW3
Shoc2	4	427;1048;2190;2210	CATGTTGAGGGAATAAATGG;ACATACCTATTGTATCTGGG;TAACATTTCTACTCTACCAG;ATTATGTAACCTCATTACCC	4	6.2268	3.74731	3.88e-05	0.00143132	0.00140325	Positive	CR6
Slc4a7	4	106;236;2323;19013	TCAGGAACATAAGGTCCATG;ACAGTATAGGAAAAGAATCG;GCAGATCCATTAGGAAACAC;TCTGCAAAGGATCGAACCAG	2	4.28079	3.52406	0.00225753	0.0203395	0.0203395	Positive	CW3
Smarca4	4	76;226;315;393	GAGGTATGTGATGAGCGCGA;GCTGCAGCACCTTCGAACAG;CCCTGTGAAGGTGATCCACG;CAAACGTCAGTCACTACGGG	4	9.2268	5.64314	0	0	0	Positive	CW3
Smarca4	4	293;425;966;12301	GCTGCAGCACCTTCGAACAG;GAGGTATGTGATGAGCGCGA;CCCTGTGAAGGTGATCCACG;CAAACGTCAGTCACTACGGG	3	5.15159	3.58682	0.000318071	0.0064488	0.00637871	Positive	CR6
Smarcb1	4	52;138;168;785	GTTCTACATGATCGGCTCCG;TCTTCTTGTCCCGACCCATG;CTGGCGGCGACTAGCCACTG;AGATCATGGATATACCACCC	4	8.02489	5.69519	7.76e-06	0.000330413	0.000250658	Positive	CW3
Smarcc1	4	206;344;423;1216	TGAGCAAGAAGATCTTACCA;TAAAACACTAGCTGGACTGG;GCTGCAGCAGATGCTACACG;TCAGCTAACACATTGAAGTG	4	7.26464	4.85809	1.55e-05	0.00049282	0.000398306	Positive	CW3
Smarcc1	4	303;444;681;9415	TCAGCTAACACATTGAAGTG;GCTGCAGCAGATGCTACACG;TAAAACACTAGCTGGACTGG;TGAGCAAGAAGATCTTACCA	3	5.60551	3.72073	0.000124125	0.00346987	0.00346987	Positive	CR6
Smarce1	4	9;22;29;34	CAGCCTGCTGAGGATCCAGA;AGAGTGTGGTACCTGATGTG;ATGAGGTACAGCAGAAAGGT;GAATACGAAGCAGAAAAGGT	4	13.4785	8.21925	0	0	0	Positive	CW3
Smarce1	4	9;35;48;56	CAGCCTGCTGAGGATCCAGA;GAATACGAAGCAGAAAAGGT;ATGAGGTACAGCAGAAAGGT;AGAGTGTGGTACCTGATGTG	4	12.6116	7.73765	0	0	0	Positive	CR6
Smc3	4	215;279;598;777	AGCTCAATGAAAACCTACGC;AAGAAGAGCGAGGAATTGCG;TCTGCTAAGCGAGAAACGAG;AGTTATTCATTACGATGCCA	4	8.04269	4.98077	7.76e-06	0.000338097	0.000250658	Positive	CW3
Smc3	4	350;474;1548;4190	AGCTCAATGAAAACCTACGC;AGTTATTCATTACGATGCCA;AAGAAGAGCGAGGAATTGCG;TCTGCTAAGCGAGAAACGAG	4	5.11552	3.77358	0.000341345	0.00677184	0.00677184	Positive	CR6
Snrpb2	4	45;53;96;591	TTAAAGACCATGAAGATGAG;CTGAGAAAAAAGGGCATACA;TATAATTTGGAGGATAATCA;CCAAATGCAGCTAATACCCA	4	8.51802	6.22389	0	0	0	Positive	CW3
Snrpb2	4	59;61;243;338	CTGAGAAAAAAGGGCATACA;TTAAAGACCATGAAGATGAG;TATAATTTGGAGGATAATCA;CCAAATGCAGCTAATACCCA	4	9.48871	6.10441	0	0	0	Positive	CR6
Snupn	4	103;120;136;1440	TGGGAAAAGAGCCCTTATCG;TTGGATGTGATGTGCTGGCG;AGAAACTCAACAACAGCCAA;ACTTGTATTGACACAGGCGT	3	7.70134	5.45678	7.76e-06	0.000290764	0.000250658	Positive	CW3
Spout1	4	204;386;906;17295	TGAGATTGTGGTGTTCGATG;ACGGCCTTACACTCTGAGTG;CATGGCTCTTTGGTCAACTG;GGAGCGGCAGCGTGCCCAAG	3	5.2348	3.69421	0.000248251	0.0032533	0.0032533	Positive	CW3
Sptlc1	4	41;43;44;240	CCCTCCAACCCACAACATCG;TCCTGCGTACTCTAAGAGAG;AATGTGCCATAGAACCCTCG;TTTGTCGTAGAATCCTCGCA	4	10.0835	6.92478	0	0	0	Positive	CW3
Sptlc1	4	18;20;30;141	CCCTCCAACCCACAACATCG;AATGTGCCATAGAACCCTCG;TCCTGCGTACTCTAAGAGAG;TTTGTCGTAGAATCCTCGCA	4	11.0075	7.53594	0	0	0	Positive	CR6
Sptlc2	4	27;31;36;71	AATCTCGAAGATATCCAAAG;GTTGTGTTTGAAGATTCGAA;TGAGAGCAATCACTTCAGGA;ACAACTATCTTGGATTTGCG	4	12.1993	7.6354	0	0	0	Positive	CW3
Sptlc2	4	10;13;17;40	TGAGAGCAATCACTTCAGGA;AATCTCGAAGATATCCAAAG;GTTGTGTTTGAAGATTCGAA;ACAACTATCTTGGATTTGCG	4	13.1961	8.4254	0	0	0	Positive	CR6
Sptssa	4	26;258;316;10557	CTGAACACGGTTCGCTCCCA;CCATCACGCAGATTCGATGC;CAGGTACTGGTAGTAGAACC;GTACAGGGCCATCCCCACCA	3	6.60388	4.56399	3.1e-05	0.000717935	0.000646141	Positive	CW3
Sptssa	4	11;132;698;3615	CTGAACACGGTTCGCTCCCA;CAGGTACTGGTAGTAGAACC;CCATCACGCAGATTCGATGC;GTACAGGGCCATCCCCACCA	3	5.57348	4.74689	0.000139641	0.00384534	0.00384534	Positive	CR6
Srm	4	161;184;369;395	CGTGCCCTGGCTCACCCATG;TCTGCCCGCAGTAAAACCTA;GGTCCAGTGCGAGATTGATG;GCCCAGGTGCTGATCATCGG	4	9.21798	5.55285	0	0	0	Positive	CW3
Srsf11	4	162;1432;5532;7875	GCTGGCGCTCGGAGACACGT;CTTAACAAAGCAGACACGAG;CGAGATCAAGATCTCGCTCG;CGATCTCATTCCCGAGAGAG	4	4.01937	2.93582	0.00429784	0.0341278	0.0339838	Positive	CW3
Srsf3	4	191;268;1114;28971	CTTCTCTTTAGAACACTGTG;CTCCTGCGGTAATCATCTCG;GTAAGAGTGGAACTGTCGAA;TGGACCACTCAGAAGTGTGT	3	4.96668	3.7195	0.000496501	0.00581527	0.00581527	Positive	CW3
Srsf7	4	37;39;57;63	ACAGAAACCAAGGTATATGT;AAAGGGCATTCAGTTACTAT;CTATCAAAACGAGATCTCCG;TCCACAAAGGCGAATCCTGG	4	12.407	7.45367	0	0	0	Positive	CW3
Srsf7	4	379;543;1096;25185	ACAGAAACCAAGGTATATGT;AAAGGGCATTCAGTTACTAT;CTATCAAAACGAGATCTCCG;TCCACAAAGGCGAATCCTGG	3	4.98781	3.42493	0.000488743	0.0092962	0.00920134	Positive	CR6
Stag2	4	89;98;153;155	CTTACTTTAGCTAATAACTG;ATTTCGACATACAAGCACCC;TGGTTGGACTATGCATGATA;TTTCCTTCCATTCTAGTCGG	4	10.843	6.44619	0	0	0	Positive	CW3
Stag2	4	26;44;46;74	CTTACTTTAGCTAATAACTG;ATTTCGACATACAAGCACCC;TGGTTGGACTATGCATGATA;TTTCCTTCCATTCTAGTCGG	4	12.1274	7.46568	0	0	0	Positive	CR6
Stat1	4	637;782;1149;21502	TGTGATGTTAGATAAACAGA;GGATAGACGCCCAGCCACTG;GAAAAGCAAGCGTAATCTCC;TTAATGACGAGCTCGTGGAG	3	4.92657	3.22604	0.000566322	0.00651096	0.00651096	Positive	CW3
Stat1	4	122;161;285;419	GAAAAGCAAGCGTAATCTCC;GGATAGACGCCCAGCCACTG;TGTGATGTTAGATAAACAGA;TTAATGACGAGCTCGTGGAG	4	9.11552	5.67014	0	0	0	Positive	CR6
Tank	4	4237;4567;5465;6942	GCATCACTATAAAGGATGGT;ATAGAGTCATTGTCCATAGG;CTTCTCGTGGATTCTAGTCG;TCTGGAAAAGAATCCGCCAA	4	4.23843	2.41426	0.00249026	0.0221173	0.022013	Positive	CW3
Tcte3	7	742;780;1516;1596;3728;4145;13325	GATGACTCAATTGCTGATGT;CCCCGGTGTCTAAGAGAGAA;CCAATTCAAGTGACAAATGA;GAAGCCTAGCATGTTCGAGA;GCAATTGAGTCATCAAACGG;CCTTTCTCTCTTAGACACCG;GGATTGATGCGTTTGGCCGG	6	6.87953	4.18321	1.55e-05	0.000398306	0.000398306	Positive	CW3
Tmem30a	4	85;87;172;345	CAACAACATCCGTGAGATCG;TACTTACAAGCAAAGCACTA;GACAGACCAATTGCGCCATG;CAAGCACAAGATGTCACATT	4	9.4531	6.09141	0	0	0	Positive	CW3
Tmem30a	4	16;38;45;80	CAACAACATCCGTGAGATCG;GACAGACCAATTGCGCCATG;TACTTACAAGCAAAGCACTA;CAAGCACAAGATGTCACATT	4	11.992	7.52347	0	0	0	Positive	CR6
Tmx2	4	414;425;1792;2136	CAACCCGTGTGACTTTGACT;GCCAGCCATCGAGAAAGCCG;TCAGTGTGCATACTCACTTG;GTCACTGTGGAGCAACATGT	4	6.28597	4.02445	3.88e-05	0.000781622	0.000773307	Positive	CW3
Tor1a	4	715;2705;5112;5341	GTTGCTTAGGAAACCAGACA;GGCAGAGAGGATCACAGACG;ATCGCGGAGAATATTTACGA;TGTGTGATGTTAGAGGCGTG	4	4.69388	2.83608	0.000969729	0.0107531	0.0107531	Positive	CW3
Tprn	4	1468;1946;2660;11630	CATGGAAACTATCCCAATCG;GGAGCCAACGACCGATTGGT;GCGAGCGATTGACCGCACTG;CGGCGTGCGGACCATTCGAG	3	3.84133	2.48837	0.00567873	0.0425678	0.0425678	Positive	CW3
Traf2	4	277;963;1306;2580	AGATAACGCTGCCCGCAGAG;AGTACAAACCTTGTTACTCA;CGGACCAGGCCTTTACATGC;CACAGGTTAAGGGAAACTTG	4	5.95789	3.91173	6.21e-05	0.00100263	0.000985639	Positive	CW3
Traf2	4	169;181;16784;21425	AGTACAAACCTTGTTACTCA;CACAGGTTAAGGGAAACTTG;AGATAACGCTGCCCGCAGAG;CGGACCAGGCCTTTACATGC	2	4.51065	3.29228	0.00141968	0.0187094	0.0187094	Positive	CR6
Traf3	4	342;1198;5562;6987	GCTTTGAGATCGAGATTGAG;CAGGTTCACGTGCTGTACCG;GCTGGGGGCATTGACACACT;AGTGACTGCACGTGGCCTCG	4	4.22721	2.94377	0.00253681	0.0222149	0.0222149	Positive	CW3
Trir	4	613;867;1002;1263	TCCTTACGAAGCTGAGCGTG;AAGTTCACACCGCTGGACAC;CCGGGCGCCTCCCGACCCGG;GGGAACGTCACCCGAGAGTG	4	7.19876	4.24551	1.55e-05	0.000476662	0.000398306	Positive	CW3
Trir	4	98;311;525;674	AAGTTCACACCGCTGGACAC;GGGAACGTCACCCGAGAGTG;CCGGGCGCCTCCCGACCCGG;TCCTTACGAAGCTGAGCGTG	4	8.28973	5.14617	0	0	0	Positive	CR6
Ttc33	4	552;601;662;12963	TGATTTCATCTCATAAAGGG;TAACAACTGCAGATACAAGG;TGCAGGAGGGCTGTAAACAG;GCGTAACCCACACTCGTGGG	3	5.64227	3.56043	0.000124125	0.00177565	0.00177565	Positive	CW3
Ttf1	4	337;1789;2343;15610	GCATGTATCGGGATGACCTA;ACCTCCAGAAAGTTGCACCC;GCCTTCTGAGGAGTCCACCA;CCGAGTCATCAAGACTGTCG	3	4.00487	2.77345	0.00437542	0.0341647	0.0341647	Positive	CW3
U2af2	4	646;1978;2507;2511	CTCACCAGGCACATAAACAG;GAAGCCGAGATCGAAAGCGC;ATGCAGTACAAGGCCATGCA;CATGGCGGGGAGAACGACTG	4	6.00499	3.46887	6.21e-05	0.00102925	0.000985639	Positive	CW3
Uba52	4	141;220;397;398	TCCGACTACAACATCCAGAA;ATTCGCGGGCAAACAGCTGG;GATCTTCGTGAAGACCCTGA;AGATCCAAGACAAGGAAGGT	4	9.20484	5.50139	0	0	0	Positive	CW3
Uba52	4	2192;2233;2505;13051	GATCTTCGTGAAGACCCTGA;TCCGACTACAACATCCAGAA;ATTCGCGGGCAAACAGCTGG;AGATCCAAGACAAGGAAGGT	3	3.91868	2.4214	0.00493398	0.0464449	0.0464449	Positive	CR6
Ubr4	4	142;154;166;237	CCTCCGACATTCCGTAACTG;CTCAGCTGGATACAACCAGG;CTGAGCATGTCTAACACGAG;GAGCGTGTCATACTGCAAAG	4	10.1054	6.08673	0	0	0	Positive	CW3
Ubr4	4	261;564;627;9170	CTCAGCTGGATACAACCAGG;GAGCGTGTCATACTGCAAAG;CCTCCGACATTCCGTAACTG;CTGAGCATGTCTAACACGAG	3	5.71285	3.70906	0.000100852	0.00286264	0.00286264	Positive	CR6
Uchl5	4	296;511;796;1942	TGAACTAGACGGGTTAAGAG;TCTTGTTTCAGGTTGCCGAG;AAAGACACCAGCCAAAGAGG;TAATAATGCTTGTGCCACTC	4	6.45138	4.3249	3.1e-05	0.000676194	0.000646141	Positive	CW3
Uchl5	4	118;147;332;844	TGAACTAGACGGGTTAAGAG;TCTTGTTTCAGGTTGCCGAG;AAAGACACCAGCCAAAGAGG;TAATAATGCTTGTGCCACTC	4	7.899	5.33968	7.76e-06	0.000447287	0.000397589	Positive	CR6
Unc93a	6	1296;2017;4077;4228;11797;20749	GGGGAAGCTTGGCAAAGATG;CCTTTGTGTACTCTCCAGAG;CATGAAGGTTGACAGTAATG;GCCCACAAAGTGGATACCCA;AGTAATGTGGACCAAAGAGG;CTTTGTAGAAGCCATCCCAG	4	3.97113	2.42951	0.00460039	0.0354779	0.0354779	Positive	CW3
Unc93a	6	464;3776;4173;5152;7275;29154	GGGGAAGCTTGGCAAAGATG;CATGAAGGTTGACAGTAATG;CCTTTGTGTACTCTCCAGAG;GCCCACAAAGTGGATACCCA;AGTAATGTGGACCAAAGAGG;CTTTGTAGAAGCCATCCCAG	5	4.45976	2.74696	0.00156708	0.0194045	0.0194045	Positive	CR6
Uqcc2	4	165;289;522;11176	CCAGTGGACGAGACCAAACG;GCTCTCGTACATCTGATCAC;CACAGAGCTTAAGGAAACGC;TTCAAACTACTACAAGCACA	3	5.95106	4.0469	6.21e-05	0.000994063	0.000985639	Positive	CW3
Urb1	4	926;1926;2120;15727	CATGATCAGAAGCTTAGTGG;CCAGATTCGAGAAGTCACCC;TGTTGGGTAAATGGTCCATG;ACTGTAGTATCTGTGAAACT	3	4.13393	2.65253	0.00316519	0.0269617	0.0269617	Positive	CW3
Usp16	4	30;50;73;135	TGAAAGGACTCAGTAATTTG;AGATGCGGTCCACAAAACTC;TCTTTACTAAGAACCAACGA;GTGGATACCGACTCCACCCA	4	11.083	7.01093	0	0	0	Positive	CW3
Usp16	4	60;62;914;3305	AGATGCGGTCCACAAAACTC;TGAAAGGACTCAGTAATTTG;TCTTTACTAAGAACCAACGA;GTGGATACCGACTCCACCCA	4	5.52769	4.67822	0.000155157	0.00414875	0.0039036	Positive	CR6
Vapa	4	59;75;83;3451	AAACAGTCACAATTGACCCC;TAGTGACTACATCTGTGAAG;GGCCGCACACAGTACCGGCG;TCTTAAATTGCAAAATCCAT	3	8.34444	5.40023	0	0	0	Positive	CW3
Vapa	4	248;259;1958;5159	TAGTGACTACATCTGTGAAG;AAACAGTCACAATTGACCCC;GGCCGCACACAGTACCGGCG;TCTTAAATTGCAAAATCCAT	4	4.75411	3.7749	0.000814572	0.0127363	0.0127363	Positive	CR6
Vcpip1	4	1250;1436;2139;4087	GCGTGTCGTGCAAATACAGG;ATTCGAATAACAACTAACGA;TATGGGACGATGTAACACAT;ACTAATTCTAGGTCTACTGG	4	5.15875	3.30736	0.000318071	0.00400044	0.00394745	Positive	CW3
Virma	4	100;112;211;3120	ATTATATTACCTTCTACGGG;GATATGAAGTGGTACCTGCG;ATTGTGGGGAAAGACTTGAC;CCTTTATGATCAAGACGAAG	3	7.12952	4.99619	1.55e-05	0.000468973	0.000398306	Positive	CW3
Vmac	4	983;1262;5143;5554	CGCTGCGCGTCGGTGCACGG;GGCCTGCAGGCTGCGAACTG;GGTCGCGCCAAGGACCGGTG;GCCACCTCTGCAGATCCGGG	4	4.62595	2.94524	0.00114816	0.0122951	0.0121016	Positive	CW3
Vmn2r93	5	736;1036;2306;31207;78512	TTGGAGACAGACAATAGATG;TGACTATGGTCACTCAAGAG;ATGAACAATCAAGGAAACAA;ACTCACAGGATCATCATGGA;ATACCATACACATATTTGGA	3	3.64023	2.59338	0.00817675	0.0561291	0.0560834	Positive	CW3
Wasf2	4	1028;1113;2289;3366	GAGGAGGCAGAGTCCGACTG;AGGACTGAGATTGTTAAGAG;ACGTAAAATCAAGACACGCA;AGCAAGGGAGTTTACTCGGG	4	5.49592	3.44453	0.000155157	0.0021538	0.0021538	Positive	CW3
Wdr12	4	325;353;968;5291	AGTTCCATGTGTTTGACCAA;AGCGTCTGACCAAAGGACTG;AAAGTCGATAATGACAATTG;AAGGTCCGCAACTTCAGCAG	3	5.1489	3.89599	0.000318071	0.00394745	0.00394745	Positive	CW3
Wdr18	4	119;131;179;875	AACCTGCTCACCTACCGAGG;AGAGAGCATCTACCTGTGGG;GAGCACCACATATTCTGTGG;GTCCTGCCTGAAGTTTACAG	4	7.83634	5.54908	7.76e-06	0.000302879	0.000250658	Positive	CW3
Wdr74	4	245;429;1763;10606	ATGAGTGTTCCCTACGATGA;GGGAGACTGGATCATAGACA;CGTGAGGTACTTTAATGCTG;GAACCTTCAGCGGAAACATG	3	4.37219	3.34996	0.00183085	0.0172413	0.0172413	Positive	CW3
Wdr82	4	82;127;174;377	TTACCTTATCAAAAGAACGA;AGTATGATAGGACCTGTGAG;ACTTTCCTGGACACAGCAAG;TAGGGCCTCATGCATCTACA	4	9.29901	5.97098	0	0	0	Positive	CW3
Wdr82	4	34;65;387;621	TAGGGCCTCATGCATCTACA;TTACCTTATCAAAAGAACGA;ACTTTCCTGGACACAGCAAG;AGTATGATAGGACCTGTGAG	4	8.43201	5.73481	0	0	0	Positive	CR6
Wrap53	4	1304;6798;6821;7659	GAAGAGTTGGGAACCATCCG;GACACAACCAAGCTAGCCAC;GGTCATTACCACTTACTAGG;AGAAACGAATCTCCCCGAGT	4	4.06768	2.33707	0.00383237	0.0313618	0.0313618	Positive	CW3
Wtap	4	78;90;117;156	CAGACTTCAAAGTTATGGCA;GAGCTTAAAAGCAGTCAGGA;AAGCTGTGCAATACGGCCCT;TACTCAGCAAACGATGTGAC	4	10.8319	6.56348	0	0	0	Positive	CW3
Wtap	4	76;121;130;593	GAGCTTAAAAGCAGTCAGGA;TACTCAGCAAACGATGTGAC;AAGCTGTGCAATACGGCCCT;CAGACTTCAAAGTTATGGCA	4	8.51215	5.88788	0	0	0	Positive	CR6
Zc3h13	4	265;1226;1546;4172	GGGCAACCTTGAGACACATG;CGTCGGGATAACAGGGAACG;TCGGGATGGTCATCGAAAGG;CGAGGATATTCATGTTCGAG	4	5.123	3.60144	0.000341345	0.00420842	0.00420842	Positive	CW3
Abt1	4	96;407;51091;56891	AGTCTACATAACACGCCCAT;CAAGGACTATACCGAAGGCT;CAAAGGCAAGGTGTTCACTG;TGAAGGGGCCGGAATCGCGG	2	3.8093	3.06382	0.00589595	0.0530636	0.0530636	Positive	CR6
Actr5	4	271;408;1243;5143	CCTGGGCAGCACACTGACGG;CATCACACTCAGCCGCATGG;GGTAGCCGGATGAAATGATG;ACCGGGACGTTGCGATCGAA	3	4.82464	3.81546	0.000736994	0.01225	0.0121407	Positive	CR6
Actr8	4	449;484;612;31639	ACTGACCGGAAGTGTATCTG;TGAATGTTGTAACAGTCCAG;AGATGTCAAACGGTACAAGG;GCGGCCCATCGTACCCGCGT	3	5.74432	3.68604	9.31e-05	0.00268373	0.00268373	Positive	CR6
Adipor2	4	971;2681;3389;3409	CAGGCCCGAAAGGAAGGCAT;AACATTTGGACACATCTCCT;CGTGAGGGATCACTCGCCAT;GCACCAACTTGATGATACAA	4	5.47386	3.13219	0.000162914	0.00417468	0.0039036	Positive	CR6
Arf1	4	1248;1790;1808;3610	ATTCTATACAAACTTAAGCT;AGGCCCGTGAAGAGCTCATG;CTGCCCCCCAGGTTTCAATG;CTGGCCGCCCACATCCCACA	4	5.37434	3.36885	0.000186188	0.00434831	0.00434831	Positive	CR6
Atat1	4	88;295;9639;22214	TCAGTATGTAAATAACGTGC;TGAGCAGCTTCGGCGATGGT;ACATCCACGAGTCGGTGCAA;GACCTCTTAGGATGACCGGG	2	4.08761	3.2218	0.00366945	0.0367943	0.0367943	Positive	CR6
Atp1b3	4	522;1847;2594;78583	GCCACAGACTTACAAAAAGT;CGAGCAGCGGAGAGTTTCTG;TCAACACAATTACCTGGACT;CTCCATCAGGACAACTTGTG	3	3.87369	2.65837	0.00538394	0.0494197	0.0492542	Positive	CR6
BB287469	9	396;615;2671;2999;5391;11708;13128;19309;29292	ATGTTCTGGAAGTTCTCCAT;GGAAGTTGAGAAAAAAGGTT;AAGGCAAAGGAGGCAAAAAC;TGAATCTGAGAAAAGAGAGT;TTCTCAACTTTCCTCTTATG;GAAATCGTGTTTGATGATAT;ATATGGGCAAGAGTATGCTC;TGTGTCCATTTCATTGATTT;TGCTCAGGTGACCAAAATGC	5	3.86852	2.83881	0.005446	0.0492542	0.0492542	Positive	CR6
Brd9	4	836;1436;2006;3670	ATTAACCGGTTTCTCCCGGG;ACTTGCTAGACAGTGAACTC;ACGATCGCTCAGACCACGAA;GGAACACTGCGACTCAGAGG	4	5.34571	3.41678	0.000201704	0.00453833	0.00448365	Positive	CR6
Canx	4	811;1349;3945;5930	ATGTTTGGTCCAGATAAGTG;CAGGGGCTGACTCACACTTG;TCACGTGAAGGGTTTACAGG;TTCATCTGGGATCTTAGAAG	4	4.51215	3.00737	0.00141968	0.018844	0.0187094	Positive	CR6
Casc3	4	576;2078;2492;12072	GTCTAGAGCAGACTCCTGTG;AGGAATTACTCTCGATCTGG;TCTTCGAGGACAGACTCAGG;GCTCCAGTAGACTCTACCAC	3	3.92538	2.62839	0.00489519	0.046316	0.046316	Positive	CR6
Ccnk	4	1830;1950;2855;22354	TGAAGCGAGCCCCCTCTCGG;TCCCACCATCTCCTATACAT;CCGACAGGCCAAGCGCGCCG;CCTACACCACAAGTGCCCCA	3	3.75026	2.42754	0.0065864	0.0581431	0.0581431	Positive	CR6
Cct4	4	1148;2372;2953;6939	GATGGATCGAGTGCTTCGAG;CCGCTTCAGCAATATTTCCG;CTCTCCAATGAGTGTCAATG;AGCAATGATGACAACCGACG	4	4.23918	2.87603	0.00249026	0.0275122	0.0275122	Positive	CR6
Cd274	4	3824;4039;5782;6339	TGCTGCATAATCAGCTACGG;TCCAAAGGACTTGTACGTGG;GCTTGCGTTAGTGGTGTACT;CTCAGCACAGCAACTTCAGG	4	4.39629	2.47034	0.00176879	0.0209193	0.0209193	Positive	CR6
Cdk12	4	262;1185;4362;4957	ACAGGAACTTGACTAAATGG;AGGGAGAACGAGGAACGTCG;AGGACCGGAGTAAAAGTCAT;GTCCTTACAGCCGACGACAG	4	4.8235	3.20119	0.000736994	0.0121407	0.0121407	Positive	CR6
Cnot10	4	431;780;2895;21283	GATGGCTGCAAACTCCACAC;TCATCTGCGCCAGTACACGG;AAGGGGCAACTATCGAAAAG;TGCCAAGTCCAAGATACACC	3	3.73236	2.88413	0.00683465	0.0594808	0.0594808	Positive	CR6
Cse1l	4	125;281;40075;78709	GGAACTTACTCGTTACAACA;CTAATAGCATCACTCAGCTA;GCTGCTTGTGATCTTGTACG;GGTACTGCACAGTTCAATGG	2	4.12969	3.16693	0.00322726	0.0330794	0.0330794	Positive	CR6
Csnk1a1	4	692;1033;1360;17279	CTGGTCAGCTAACATAAGTA;AAAGGTGCTTACCGTATGTG;CACATCTTGGTATTGAGCAG;TTGCTCTCGTACAGCAACTG	3	4.70808	3.06185	0.000946455	0.0143132	0.0143132	Positive	CR6
Cul4b	4	63;70;8395;9530	AATCGGCTTTACGCAGCCGA;CTCTTCAGTAGAGTTCGGGG;GACTTACCATTTGCCTACAG;AAAACTATACGGATGAGACA	2	5.3346	3.91766	0.000201704	0.00448365	0.00448365	Positive	CR6
Cwf19l1	4	501;580;1448;4908	ATATCTTACTCACGTCCCCG;TGTGCTTGGTGCCAATAACG;TCGCCGTGAGCTTGAAACCG;CGCCAGCGCTATGAAGCGAG	4	4.84075	3.64465	0.000705963	0.0118409	0.0118409	Positive	CR6
Ddi2	4	746;1446;2574;13566	GAGCCCGGAGAGAACAAGAA;TCAGCAAGGACAACTCATGC;ATGCTACTGAAGTCAATCCG;TCTGTCACCTGAGTCGACAA	3	3.88366	2.68061	0.00532187	0.0490943	0.0490943	Positive	CR6
Dhfr	4	1198;2566;2890;76461	AACCTCAGAGAACCACCACG;CAGCCCGGCCAATACCTGAG;GACATGGTTTGGATAGTCGG;TCGCCGTGTCCCAAAATATG	3	3.73458	2.40296	0.00677259	0.05922	0.05922	Positive	CR6
Drap1	4	115;166;851;7180	CTGGCAAGCCTTCTTCAACA;GATCAAAAAGATCATGCAGA;GGACAAGGGTCCTCGAAGGT;ATCAGTGCCTGACATGCAGG	3	5.3161	4.08046	0.000209461	0.00454655	0.00454655	Positive	CR6
Eed	4	506;2744;3243;4510	ACTCTTGTGGCAATATTCGG;TTATACGAATGCCATTCACA;ACAAATACGCCAAATGCACC;CAGCAACTGCTAATAGAGGG	4	4.98767	3.08875	0.000488743	0.00920134	0.00920134	Positive	CR6
Eif1a	7	396;2245;2671;2999;14368;63336;64341	ATGTTCTGGAAGTTCTCCAT;GGATGGGCAGGAGTATGCTC;AAGGCAAAGGAGGCAAAAAC;TGAATCTGAGAAAAGAGAGT;AAAGGTTTGGATAAATACCT;TCAAAATGCTGGGAAATGGA;TGTGCTTTGACGGTGTGAGG	4	4.20241	2.61295	0.00263766	0.02813	0.02813	Positive	CR6
Elmsan1	4	156;1408;1502;14020	GGAGAAGCGGAAAAGCGTGT;TCACTTACTAGAGCGGAGCA;CTGACGGCTTGTGCTCGGTG;TCCCTACTATAACCACCCGG	3	4.57948	3.14342	0.00126453	0.0174108	0.0174108	Positive	CR6
Etf1	4	296;1670;6016;6065	CGACAATAAGTTTCATACAG;GTGGATCTCCCAAAGAAACA;AGACTCAAACTTTATAACAA;CAAAGACCAGATTTCACGAG	4	4.47305	2.92502	0.00152053	0.0194819	0.0194045	Positive	CR6
Fam91a1	4	206;290;892;2458	ATTGATAAGATCATCGACTC;CCTTGAGATAGACTTATCGC;CCAGATCCTTATTATGACGC;TCAGTGAGTTCCTACCTGCG	4	6.04204	4.347	5.43e-05	0.00178915	0.00178915	Positive	CR6
Fli1	4	437;5226;6175;6221	TCACGACTGAATGTCAAGGA;CACAGGAGCACGTTCGACAG;ATTGTGTAAAATGAACAAGG;AAGCAGTCATATCTGCCTTG	4	4.42893	2.62642	0.00165242	0.0197968	0.0197968	Positive	CR6
Fnbp4	4	249;256;2243;4623	CATCTCAGGACGGAGTGCGT;AGACTCGAATTGCAGACTGG;CAGACATGTATACAAAGGAG;CGAGGCAGATTCGACTGCGG	4	4.94468	3.78077	0.000527533	0.00983129	0.00983129	Positive	CR6
Fzr1	4	833;1130;1245;4689	CCGTCCACACCAGAGCACAA;AATCTTAGAGATCTTGCGTG;GGGGACTCAGTGACTTCCGT;GAGGGCCACACAGCACGAGT	4	4.92005	3.51625	0.000581837	0.0104222	0.0104222	Positive	CR6
G2e3	4	4242;4311;6825;7698	AGTGTATGTTAATGGCAATG;CCCAGCATAAAGAACTACTG;TGATAACTTCGTTTACACGT;GACATCTTCGAATATCACAG	4	4.05886	2.31067	0.00388667	0.0385533	0.0385533	Positive	CR6
Gm11559	13	1302;2608;2635;2673;3576;3718;7130;14733;15487;31975;36594;49657;61663	CACACAGCTTGGTCTCCAGC;AGGTGGTTTGACAGCAAGGC;GCTGTCAAACCACCTGCTGC;TGGGCTGACAGCAGCTGGGC;CAGGTGGTCCTGCAGCAGGT;ACAGCTTGGTCTCCAGCAGG;CAGCAGGTGGTTTGACAGCA;CACACAGCATGGCTGGAAGC;GAAGCAGGTCCTGCAGCAGG;CAGCAGCAGGGCTGGCAGCA;AGGGCTGGCAGCAGGGTGTG;GCTGCAGGACCACCTGCTGC;TCTCCAGCTGCTGTCAGCCC	6	4.89554	2.90446	0.000620627	0.0109053	0.0109053	Positive	CR6
Gm11567	14	1302;2608;2635;2709;3576;3718;7130;14733;15487;23899;31975;36594;49657;61663	CACACAGCTTGGTCTCCAGC;AGGTGGTTTGACAGCAAGGC;GCTGTCAAACCACCTGCTGC;CAGCTGGACTGACAACAGCT;CAGGTGGTCCTGCAGCAGGT;ACAGCTTGGTCTCCAGCAGG;CAGCAGGTGGTTTGACAGCA;CACACAGCATGGCTGGAAGC;GAAGCAGGTCCTGCAGCAGG;TGGACTGACAACAGCTAGGC;CAGCAGCAGGGCTGGCAGCA;AGGGCTGGCAGCAGGGTGTG;GCTGCAGGACCACCTGCTGC;TCTCCAGCTGCTGTCAGCCC	6	4.67327	2.76523	0.00103179	0.0151084	0.0151084	Positive	CR6
Gm11568	13	1302;2608;2635;2709;3576;3718;7130;14733;15487;31975;36594;49657;61663	CACACAGCTTGGTCTCCAGC;AGGTGGTTTGACAGCAAGGC;GCTGTCAAACCACCTGCTGC;CAGCTGGACTGACAACAGCT;CAGGTGGTCCTGCAGCAGGT;ACAGCTTGGTCTCCAGCAGG;CAGCAGGTGGTTTGACAGCA;CACACAGCATGGCTGGAAGC;GAAGCAGGTCCTGCAGCAGG;CAGCAGCAGGGCTGGCAGCA;AGGGCTGGCAGCAGGGTGTG;GCTGCAGGACCACCTGCTGC;TCTCCAGCTGCTGTCAGCCC	6	4.89554	2.9014	0.000620627	0.0109053	0.0109053	Positive	CR6
Gm1604b	4	2076;2768;3622;4988	TGCGACTCATCCTACCTCTG;GGAACTATGGAAGAAGATCG;TGGGGTGGGCTCAACATCCA;CTGTTATCAGACCGCCGAAG	4	4.81267	2.86098	0.000760267	0.0124132	0.0123218	Positive	CR6
Gm2016	11	396;615;988;2194;2671;2999;11708;13128;19309;29292;33276	ATGTTCTGGAAGTTCTCCAT;GGAAGTTGAGAAAAAAGGTT;AATGCTGGGATGTGGACGGT;GGAGGCTGTGCCACATAAGA;AAGGCAAAGGAGGCAAAAAC;TGAATCTGAGAAAAGAGAGT;GAAATCGTGTTTGATGATAT;ATATGGGCAAGAGTATGCTC;TGTGTCCATTTCATTGATTT;TGCTCAGGTGACCAAAATGC;AATGGACACATTTGGTGCTA	6	5.96342	3.65142	6.21e-05	0.00197423	0.00190843	Positive	CR6
Gm2022	9	396;615;2194;2671;2999;11708;13128;19309;29292	ATGTTCTGGAAGTTCTCCAT;GGAAGTTGAGAAAAAAGGTT;GGAGGCTGTGCCACATAAGA;AAGGCAAAGGAGGCAAAAAC;TGAATCTGAGAAAAGAGAGT;GAAATCGTGTTTGATGATAT;ATATGGGCAAGAGTATGCTC;TGTGTCCATTTCATTGATTT;TGCTCAGGTGACCAAAATGC	5	5.0869	3.16891	0.000364618	0.0071566	0.00708127	Positive	CR6
Gm21319	9	615;800;988;2671;2999;5391;13128;29292;68511	GGAAGTTGAGAAAAAAGGTT;ACCAACCAATATAATGTCTG;AATGCTGGGATGTGGACGGT;AAGGCAAAGGAGGCAAAAAC;TGAATCTGAGAAAAGAGAGT;TTCTCAACTTTCCTCTTATG;ATATGGGCAAGAGTATGCTC;TGCTCAGGTGACCAAAATGC;GGAGGCAAAAACAGGTGCAG	6	5.18359	3.60408	0.000310313	0.00636142	0.00636142	Positive	CR6
Gm4027	9	396;615;2671;2999;5391;11708;13128;19309;29292	ATGTTCTGGAAGTTCTCCAT;GGAAGTTGAGAAAAAAGGTT;AAGGCAAAGGAGGCAAAAAC;TGAATCTGAGAAAAGAGAGT;TTCTCAACTTTCCTCTTATG;GAAATCGTGTTTGATGATAT;ATATGGGCAAGAGTATGCTC;TGTGTCCATTTCATTGATTT;TGCTCAGGTGACCAAAATGC	5	3.86852	2.83881	0.005446	0.0492542	0.0492542	Positive	CR6
Gm5662	10	266;396;615;988;2194;2671;11708;13128;19309;29292	TGAATCAGAGAAAAGAGAGT;ATGTTCTGGAAGTTCTCCAT;GGAAGTTGAGAAAAAAGGTT;AATGCTGGGATGTGGACGGT;GGAGGCTGTGCCACATAAGA;AAGGCAAAGGAGGCAAAAAC;GAAATCGTGTTTGATGATAT;ATATGGGCAAGAGTATGCTC;TGTGTCCATTTCATTGATTT;TGCTCAGGTGACCAAAATGC	6	6.58356	4.35317	3.1e-05	0.00124463	0.00119277	Positive	CR6
Gm5934	17	85;225;376;4215;6905;8423;13024;13471;15686;26786;26799;60543;65263;65391;68129;76389;77889	TAGAAGCAGATGAAAATATA;ACGTTCTGTAGAGACACCAA;CTGTGGGTGATACCAAAGGA;TCATCTGCTTCTACGTGAGG;AGACATGCATGAGAAGTCCA;TTCCCATCATCATGAGTTAC;GAAGAGCAGGCTCATTCTGA;TAGAGACACCAATGGAAAAC;TAAGTGGTGAACAGCAAGTT;ACTATGTTGAATAAATCTGG;ATCCAGTAACTCATGATGAT;AAGAAGTAGTTGGAGATATA;GTGTGAGCAGAAGTTTGATA;TTCAGATGAAGAAGAAGAGC;CATGCATGAGAAGTCCATGG;TGTTGAATAAATCTGGAGGT;ATAGTAAAGAGGCCAGCATT	3	4.17398	2.58636	0.00284712	0.0300168	0.0300168	Positive	CR6
Gm8300	9	266;396;615;988;2194;2671;4053;11708;19309	TGAATCAGAGAAAAGAGAGT;ATGTTCTGGAAGTTCTCCAT;GGAAGTTGAGAAAAAAGGTT;AATGCTGGGATGTGGACGGT;GGAGGCTGTGCCACATAAGA;AAGGCAAAGGAGGCAAAAAC;ATATGGGCAAGAGTATGCCC;GAAATCGTGTTTGATGATAT;TGTGTCCATTTCATTGATTT	7	7.54229	4.97719	7.76e-06	0.000408949	0.000397589	Positive	CR6
Gm9992	6	464;981;3776;4173;7275;48540	GGGGAAGCTTGGCAAAGATG;CTTTGTAGAGGCCATCCCAG;CATGAAGGTTGACAGTAATG;CCTTTGTGTACTCTCCAGAG;AGTAATGTGGACCAAAGAGG;GGGTGCAGCCCCTCTGTGGT	5	4.45976	3.06417	0.00156708	0.0194045	0.0194045	Positive	CR6
Gnb2	4	151;258;439;983	ACAGGCCACAAAGTTCCCTG;GGACGCCAGAAAAGCATGCG;CTATAGTCTCAAGACCCGAG;AGAACACGGAGGACCCTCCG	4	7.63416	5.03413	7.76e-06	0.000420976	0.000397589	Positive	CR6
Gpank1	4	1511;3119;3186;7326	CAGGTCACAGACTCCAACCC;CTAGAACCCCAAGAGGCAGG;ATGAAGACAGGATGGCCCAG;GGTGAGCAGTAGATGTGTGG	4	4.1449	2.74239	0.00303331	0.0314408	0.0314408	Positive	CR6
H2-Q7	4	701;972;2513;13838	TGGTATTGCAGAGAAAGACC;GTGGACGGCGGTGGACATGG;CTGGTTGTAGTAGCTCTGTG;CGTGCGCTTCGACAGCGATG	3	3.91457	2.81292	0.00499604	0.046554	0.046554	Positive	CR6
H2-Q9	4	701;972;2513;13838	TGGTATTGCAGAGAAAGACC;GTGGACGGCGGTGGACATGG;CTGGTTGTAGTAGCTCTGTG;CGTGCGCTTCGACAGCGATG	3	3.91457	2.81292	0.00499604	0.046554	0.046554	Positive	CR6
Hdlbp	4	201;951;3620;4442	TCTGTACGGTTAACACTGGG;TTAGGAAAATGAGCGCACCA;CAGCAGCCGGAAATATGATG;TGATCTTGATCTGATTACTG	4	5.01406	3.38415	0.000418923	0.00805118	0.00805118	Positive	CR6
Hist1h4m	13	518;600;765;1201;4981;18180;20617;26375;39246;39495;54458;64521;76691	GTGCTGCGCGATAACATCCA;AGTGCTGCGCGATAACATCC;TGGCAAAGGAGGAAAAGGCC;TATCGCGCAGCACTTTGCGG;CCGCCATCCGCCGCCTGGCC;ATGTCTGGTCGTGGCAAAGG;TGTTATCGCGCAGCACTTTG;GGAACACCTTCAGCACACCG;GGAAAAGGCCTGGGCAAAGG;GGAGGAAAAGGCCTGGGCAA;GGAGACCCGCGGTGTGCTGA;GAACACCTTCAGCACACCGC;CTCATCTACGAGGAGACCCG	4	4.49129	2.95192	0.00145847	0.0188174	0.0188174	Positive	CR6
Hist1h4n	13	518;600;765;1201;4981;18180;20617;26375;39246;39495;54458;64521;76691	GTGCTGCGCGATAACATCCA;AGTGCTGCGCGATAACATCC;TGGCAAAGGAGGAAAAGGCC;TATCGCGCAGCACTTTGCGG;CCGCCATCCGCCGCCTGGCC;ATGTCTGGTCGTGGCAAAGG;TGTTATCGCGCAGCACTTTG;GGAACACCTTCAGCACACCG;GGAAAAGGCCTGGGCAAAGG;GGAGGAAAAGGCCTGGGCAA;GGAGACCCGCGGTGTGCTGA;GAACACCTTCAGCACACCGC;CTCATCTACGAGGAGACCCG	4	4.49129	2.95192	0.00145847	0.0188174	0.0188174	Positive	CR6
Hmgb1	4	374;398;426;638	CTTTGTGCAAACTTGCCGGG;GAAGTGCTCAGAGAGGTGGA;AACCTACATCCCCCCCAAAG;CTCAGAACAGAACAAGAAGA	4	8.38509	5.04033	0	0	0	Positive	CR6
Hnrnpu	4	185;478;1673;7034	AGTTATGGCAGAGAACATGT;AGGAGCTGGAAAAACTACCT;CGTCACCGCGAAGAGCGAGG;AACGGCAGTCTCGACCTAGG	3	4.43995	3.5902	0.00160587	0.0196214	0.0194923	Positive	CR6
Ifnar1	4	247;987;1340;41503	ACAGTTGACATAAACAAGCA;GTGCAGTGTATAAGCACCAC;CTTCTAAACGTACTTCTGGG;TCTCCATGTACAAGCCTCAG	3	4.72727	3.22796	0.000868877	0.0134712	0.0134712	Positive	CR6
Ifnar2	4	319;1190;1851;6620	TAACCTGGATAATCCCTGAA;CAAAGACGAAAATCTGACGA;ACTGTGGAATTACGATTATG;GCCATCGTCATAGTGCACAG	4	4.32094	3.32916	0.00204807	0.0231821	0.0231821	Positive	CR6
Ilf2	4	186;239;529;6688	TCAGGTGCTGGCTTGACCCG;GCTCAGCAGAATTAGGGGCA;AATGACTACAGGACACAATG;ACAAGTAGGTCAAGGATCCA	3	5.93375	4.13484	6.21e-05	0.00190843	0.00190843	Positive	CR6
Irf9	4	272;923;2652;7418	GGAGAGTGGCCATTTCCCAG;CTTCATCTATGGTGGCCGAG;GTTGTAAACCACTCAGACAG;GTATATCGAATACTGCCAGC	4	4.12322	3.23528	0.00328932	0.0335293	0.0335293	Positive	CR6
Jak1	4	107;300;1641;7654	TCCGAACCGAATCATCACTG;AAACATATAGTGTACCTCTA;TGAATAAATCCATCAGACAG;CGATGCCATTCGAATGACAG	3	4.46494	3.71956	0.00155932	0.0198411	0.0194045	Positive	CR6
Keap1	4	485;1203;2567;4841	TCAAATACGACTGCCCGCAG;GGCACGCTCATAGAGGCACA;GGGCCGCCTCATCTACACAG;CATGTACCAGATTGACAGCG	4	4.86463	3.31244	0.000698205	0.0120391	0.0118182	Positive	CR6
Kmt2c	4	636;945;2915;4883	AAGCATTACCTGAATCCATG;AAAAGGCCCATTACCCAATG;GGTGAAATGGATGATAGTCG;AGAACCATTATTAGTAAACG	4	4.84963	3.29067	0.000698205	0.0118182	0.0118182	Positive	CR6
Krtap4-13	11	1141;1516;2929;6440;6725;6747;8321;27509;42650;50703;53557	AGCTGGATACACAGCAGCTG;AGCTGGACACACAACAGCTG;CTGTGGCTCTGTCTGCTCTG;TGGGGCGGCAGCAGGTGGTT;CAGCTGGAAATGCAGCAGCT;CAGGTGGTTTGGCAGCAGCT;GCAGGTGGTTTGGCAGCAGC;CAGCTAGGACGGCAACAAGT;AGCAAGGGCGGCAACAGCTG;GCAGCTAGGACGGCAACAAG;CAGCAAGGGCGGCAACAGCT	6	3.9595	2.30915	0.0046547	0.0447287	0.0447287	Positive	CR6
Krtap4-8	8	1155;1516;1991;2414;2929;4820;6725;65530	GCTGCCAGACCACCTGCTGT;AGCTGGACACACAACAGCTG;CAGCTGGAGATGCAGCAAGA;TGGACACACAGCAGCTAGGG;CTGTGGCTCTGTCTGCTCTG;AGCTGGAAATGCAGCAGCTG;CAGCTGGAAATGCAGCAGCT;CAGCTGGGGCGACAGCAGGT	7	6.64903	4.06501	3.1e-05	0.00127228	0.00119277	Positive	CR6
Krtap9-1	12	1302;2608;2635;3576;3718;7130;14733;15487;31975;36594;49657;70156	CACACAGCTTGGTCTCCAGC;AGGTGGTTTGACAGCAAGGC;GCTGTCAAACCACCTGCTGC;CAGGTGGTCCTGCAGCAGGT;ACAGCTTGGTCTCCAGCAGG;CAGCAGGTGGTTTGACAGCA;CACACAGCATGGCTGGAAGC;GAAGCAGGTCCTGCAGCAGG;CAGCAGCAGGGCTGGCAGCA;AGGGCTGGCAGCAGGGTGTG;GCTGCAGGACCACCTGCTGC;CAGCTGGACTCACAGCACCT	5	3.90055	2.43898	0.00514344	0.0476867	0.0476867	Positive	CR6
Med20	4	245;435;2601;63637	GCCAGCAAGATTGAGACCCG;AGAGGGCAAAGCAGCTCAGT;TTGGTGTCAGCAATGAGGCA;AGGTGGGCACGGTCACAATG	3	3.87022	3.17864	0.00542272	0.0495293	0.0492542	Positive	CR6
Med24	4	1838;1939;2319;25567	TAGACAGATGAAGTGGCACG;GAAGGATTTAAGCTTCCCAG;GCTACACATCGCCAAACTAG;TCGACTCCGAGAGGATCACC	3	4.01815	2.51785	0.00429784	0.0421783	0.0421783	Positive	CR6
Metap2	4	1061;1178;2152;5790	GAACGACTTCCGAGAAGCTG;GTTGTTGAGAGAACACCCAG;AATACCCACCCACACAAGAT;GTGATGCTGATGGTGCAACT	4	4.55366	3.21343	0.00130332	0.017681	0.0176322	Positive	CR6
Ncoa6	4	711;957;1642;39943	TGAACCATAGGATTCCGACC;CAATGACTACAAATCAAGGG;GCTGTTATGACGCCCCAGGG;TGTGCCCAACTTGTTACACA	3	4.46415	2.99857	0.00155932	0.0197052	0.0194045	Positive	CR6
Nkx1-1	4	797;843;1319;1414	GCTCCGGGCGAGTTCCCACG;ACAGCTCGGGACACTATGGA;CAGGGCCCAGTAGCACGCAG;CGGCGTTCTAGCTCTGCGCG	4	7.00257	4.08565	1.55e-05	0.000681581	0.00066573	Positive	CR6
Nufip2	4	113;263;879;1379	GGATAACCGACTTGAAGACT;AACTGGGGGTGGCTTAAACA;GCTAGGCGCAATAGTGCCAA;GGACCTGGAGGAACAAGTCG	4	7.04612	4.68875	1.55e-05	0.00071566	0.00066573	Positive	CR6
Olfr122	4	365;855;909;35711	TGCAACACGAATGAGTCGTG;GGCCAGAAAGAAGTACATTG;ACAGGAGGAAGCATTCTCCA;TGAGGCCCGAGGGATCTCAC	3	5.23051	3.38091	0.000248251	0.0052048	0.0052048	Positive	CR6
Olfr55	6	2071;2818;3474;5979;7894;39917	GCAGGTCAGCCAACATGCGT;CATGGGTTATGACCGCTACG;ATGTGGAGAGAATGTACTGG;CCAGGCAGGCACAGCCACGG;GAACATGACAAGTAAAATGG;ATGTACCTCTTCACTCTGCT	5	4.28617	2.63328	0.00221874	0.0248095	0.0248095	Positive	CR6
Papola	4	83;189;609;696	TAAGATGGTACCTATCACTG;ACTTCTAGCAAGTGCGCCCA;CTCCCATTAATCAGGTTGCA;AGTATTACCTACCTTTCGTG	4	8.23394	5.20978	0	0	0	Positive	CR6
Phf1	4	1818;2026;2839;6437	TGTGTGTCGCTCTGAGACCG;TGTGGCTGTTAAGAGCAGAA;GAGGTGGTAGAGGACAAGAT;CGATTGCAAAGACACACTGG	4	4.36964	2.90745	0.00184636	0.0214248	0.0214248	Positive	CR6
Ppargc1a	4	47;165;39619;42376	GAATGAGGCAAACTTGCTAG;TATTGAGCGAACCTTAAGTG;AAGACCAGTGAACTAAGGGA;TTGCATGCGCACCTTAACAA	2	4.59087	3.60929	0.00124901	0.017591	0.0174108	Positive	CR6
Prkcd	4	299;1294;2008;15385	AGAAGGTGGCGATAAACTCG;CGATGATGTAGAGTGTACCA;AGCCCACCATGTATCCTGAG;TTATAAACCTTGAATCGGTG	3	4.20402	2.94889	0.00263766	0.028459	0.02813	Positive	CR6
Prkd3	4	623;631;884;32935	CCAGTAAGAGAATCCCGTCG;CTGAACCTGACAGTTAGACA;TGAAATCATCACCGATACCG;GATAAACAATGGAGCACACG	3	5.26671	3.40412	0.000232735	0.00493559	0.00493559	Positive	CR6
Prr22	4	2515;2569;4044;6481	ACTCGATGCGGTAGATTCGG;ACCACCATCGTACCTACGGT;CGGGCCTGTAGAGCCCAAGG;CGTGGGGACTGTGATAAGCA	4	4.3578	2.70863	0.00192394	0.0221855	0.0221366	Positive	CR6
Prrc2c	4	397;505;608;41128	CTCAGCCGTCTAAATCGAGG;CTGAACCTCGAATGATGTGG;TTAGCAATACTCACATATGG;TCTTGGTCTTCATAGGAACG	3	5.75284	3.69419	9.31e-05	0.00272632	0.00268373	Positive	CR6
Psmb6	4	944;1577;1742;48862	AGTACCTGTGGAAACCAAGC;GGCAGCAGAAGATGTGATCG;ATGGCTGTGCAGTTTAATGG;TCTTACCATCATACCCCCCA	3	4.38768	2.79101	0.00180758	0.0212419	0.0212419	Positive	CR6
Psmd11	4	227;238;48016;61273	TGACATTCAAGAAAATGATG;AGGCATTATTCATGCAGCAG;GATGTCCAGGCTTTGGTGAG;TAGATATGGAAGCAGCCACA	2	4.27348	3.1101	0.00226529	0.0251774	0.0251774	Positive	CR6
Psmg2	4	93;1837;2180;2313	GGTGTAAGCAGATACCGGAA;CATCGTTGCGGTGATACGAA;ACTCAGAATCGCTCATCTCA;AACGAACTTTACACTCCTGA	4	6.14767	3.77343	4.65e-05	0.00162036	0.00159035	Positive	CR6
Rai14	4	1420;1903;2315;7054	CACCCGTTGAGCATCCGGCG;TGTGTCCGAGAGAATCGACA;TGTAGATGTTATTGATCGTG;TGGCTACTCGCATCTCCGGG	4	4.21063	2.97184	0.00261439	0.0283738	0.02813	Positive	CR6
Rasgrp3	4	354;607;1143;31765	AACGACACCTAATAAGCCTG;ACACGCTAGATATGTCCATG;AACTACGATCATGACCACGA;CCACTGGCATTCCGATACGT	3	4.93336	3.3845	0.000543048	0.00992004	0.00992004	Positive	CR6
Rhox2a	6	1884;2556;2858;4158;43217;46944	AAAATGTAAAGCGTGTGTCC;AGAGCAGGAGAAATAAGTGC;CACTGGCTGTGACCAGGAGA;GTTGCTGTTATCCATGAGGT;CAGGAGAAATAAGTGCAGGT;GGTCACAGCCAGTGGCACCA	4	3.99932	2.46213	0.00442196	0.0427148	0.0427148	Positive	CR6
Rhox2e	6	1884;2556;2858;4158;43217;46944	AAAATGTAAAGCGTGTGTCC;AGAGCAGGAGAAATAAGTGC;CACTGGCTGTGACCAGGAGA;GTTGCTGTTATCCATGAGGT;CAGGAGAAATAAGTGCAGGT;GGTCACAGCCAGTGGCACCA	4	3.99932	2.46213	0.00442196	0.0427148	0.0427148	Positive	CR6
Rhox3a	15	275;389;791;968;2381;5633;7465;9401;9631;12751;14991;17483;32575;41610;63863	GATACATAGTAATGTGGAAC;CAGAGCGGTGACCGTTGACC;GAAGACAGGAACAAGGAAGA;TGGTAATCCTGAGGTAGTTC;ACTAAAATGGACAGCACCCA;TGTAGAGGAAGACAGGAACA;TCTATTACCGGAACTACCTC;GAAGCTCTGTGGTAATCCTG;GACAGGAACAAGGAAGATGG;AAGGCCTGCAGTGCCAGCAG;GGAAAAAATGAAGAAGATGG;GGATACATAGTAATGTGGAA;GTGACCAGGCTGAAGCGCCA;AGAAATCTCTTCCAGGTCAA;GAGGGAAAAAATGAAGAAGA	4	4.58417	3.34538	0.00125677	0.0174341	0.0174108	Positive	CR6
Rhox3c	14	275;389;791;968;1701;2381;4590;5633;7465;9401;9631;12751;17483;41610	GATACATAGTAATGTGGAAC;CAGAGCGGTGACCGTTGACC;GAAGACAGGAACAAGGAAGA;TGGTAATCCTGAGGTAGTTC;GCAAGAAATGAGGAAGATGG;ACTAAAATGGACAGCACCCA;AGAGCTTCAAGATCAGTCTA;TGTAGAGGAAGACAGGAACA;TCTATTACCGGAACTACCTC;GAAGCTCTGTGGTAATCCTG;GACAGGAACAAGGAAGATGG;AAGGCCTGCAGTGCCAGCAG;GGATACATAGTAATGTGGAA;AGAAATCTCTTCCAGGTCAA	9	6.16485	4.50475	4.65e-05	0.00165152	0.00159035	Positive	CR6
Rhox3e	15	275;389;791;968;2381;5633;7465;9401;9631;12751;14991;17483;32575;41610;63863	GATACATAGTAATGTGGAAC;CAGAGCGGTGACCGTTGACC;GAAGACAGGAACAAGGAAGA;TGGTAATCCTGAGGTAGTTC;ACTAAAATGGACAGCACCCA;TGTAGAGGAAGACAGGAACA;TCTATTACCGGAACTACCTC;GAAGCTCTGTGGTAATCCTG;GACAGGAACAAGGAAGATGG;AAGGCCTGCAGTGCCAGCAG;GGAAAAAATGAAGAAGATGG;GGATACATAGTAATGTGGAA;GTGACCAGGCTGAAGCGCCA;AGAAATCTCTTCCAGGTCAA;GAGGGAAAAAATGAAGAAGA	4	4.58417	3.34538	0.00125677	0.0174341	0.0174108	Positive	CR6
Rhox3f	14	275;389;598;730;791;968;1701;5633;7465;9401;9631;12751;18796;41610	GATACATAGTAATGTGGAAC;CAGAGCGGTGACCGTTGACC;AGATGGAGGACAGGTCGAGT;ACTAAAATGGACAACACCCA;GAAGACAGGAACAAGGAAGA;TGGTAATCCTGAGGTAGTTC;GCAAGAAATGAGGAAGATGG;TGTAGAGGAAGACAGGAACA;TCTATTACCGGAACTACCTC;GAAGCTCTGTGGTAATCCTG;GACAGGAACAAGGAAGATGG;AAGGCCTGCAGTGCCAGCAG;TGGAAGAGATTTCTTCCAGC;AGAAATCTCTTCCAGGTCAA	7	8.22281	5.35279	0	0	0	Positive	CR6
Rhox3h	14	275;389;968;1701;2381;5078;7465;9401;9631;18796;32575;41610;58516;77163	GATACATAGTAATGTGGAAC;CAGAGCGGTGACCGTTGACC;TGGTAATCCTGAGGTAGTTC;GCAAGAAATGAGGAAGATGG;ACTAAAATGGACAGCACCCA;TGTAGAGGAAGATAGGAACA;TCTATTACCGGAACTACCTC;GAAGCTCTGTGGTAATCCTG;GACAGGAACAAGGAAGATGG;TGGAAGAGATTTCTTCCAGC;GTGACCAGGCTGAAGCGCCA;AGAAATCTCTTCCAGGTCAA;GGCTGAAGAGTCAAGAAATG;AAGGCCTGCAGTGCCAGCGG	5	4.43885	3.3378	0.00160587	0.0194923	0.0194923	Positive	CR6
Rnf126	4	706;848;1840;5522	AGCACTCACCCTTCCAGCGT;GCAAACTGGCTGTATCCCTG;CCCAATGGACTACGCCTGGG;CCAGTCTCGGCATCGGTACG	4	4.63599	3.39782	0.00111713	0.0161023	0.0161023	Positive	CR6
Rps6ka5	4	1119;2181;6483;7049	CATGTAGTTTCACAATATTG;CCTGGATTCTAACGGCCATG;GATTCGGGACACGACAAGGT;CTTTACCTGAAACAGTCGCT	4	4.21186	2.63853	0.00261439	0.0285417	0.02813	Positive	CR6
Safb2	4	392;1169;1514;39718	TCTTCAGAGTTCACAAGACA;GATCAAGATGAACTCACACC;TTTGGTGGCCTCATCTGACG;AGTTACTTTAAGGTCTGACA	3	4.56918	3.06087	0.00129556	0.017706	0.0176322	Positive	CR6
Samd1	4	361;481;2579;7692	GAGCATCTCGTACCGCAACG;CGTCCCGGCCTGTCTCCGCG;GGAAGTCGTGCGCTACCTCG;AATCCACTCTTGGTAGTGCG	4	4.06022	3.33846	0.00387892	0.0386843	0.0385533	Positive	CR6
Sec61b	4	79;100;152;754	CAGCCGGGTCCAACGCCCAG;AGTGGATCCCGCAGCCCGTG;TGGCCGCTCTCCCAGCAAAG;CACTTACCTCTGCCGAACAG	4	8.09489	5.76981	0	0	0	Positive	CR6
Sf3b4	4	2559;2620;4098;4264	TTCAACAAAGCCATAGCCTG;CATCGGCAAACAGCTGGTGA;GCCTTCAAGAAGGACTCTAA;AGGGTCCCGCATGATCTTGG	4	5.0851	2.88039	0.000364618	0.00708127	0.00708127	Positive	CR6
Sin3a	4	237;479;2100;7650	TATGCCTCTTGTAAACGACT;AACGTGGGGATGCATATGGT;TAAAGCCCATGATCAGATCA;AGAACGACACTAAGGTCTTG	3	4.14617	3.45317	0.00302555	0.0315376	0.0314408	Positive	CR6
Slc22a7	4	1650;2946;6262;7507	GAGCCTGGGGATAGGCAAAG;CGGAACAGGTCTAAGTACGA;CCGTATCAGGTACCCAACCA;TGCATCGGGAGCAGGAATCG	4	4.10251	2.51907	0.0035143	0.035431	0.035431	Positive	CR6
Slc27a4	4	1656;1916;2873;21205	TGACTTCAGGAAACATCGTG;ACAGACCCACAAACTCATTG;TCTACACATCGGGCACCACG;CAAACGGATAGGGTACACAA	3	3.74217	2.44331	0.00667173	0.058616	0.058616	Positive	CR6
Slc35b2	4	891;1716;1724;5819	AAGCAATATAGCCTGCCAGT;TACATGGGTGCACCATGACG;GGCTCCGCGGACAGAGACAG;CTGCAGGAAAGAGTGATGAC	4	4.54498	3.22096	0.00131107	0.0176564	0.0176322	Positive	CR6
Slf2	4	752;1535;2339;5079	GAAGACATAAGACAAGGCCG;AATGGAGCAGAGAATCAACT;TCGTCAGGGAAAAATTCTGG;AAGGAGCACCACAAAGATCG	4	4.78126	3.22306	0.000791299	0.0125857	0.0125857	Positive	CR6
Smad4	4	625;2049;2577;3543	CAAAAGCGATCTCCTCCCGA;TGTCACCATACAGAGAACAT;GGTGGCGTTAGACTCTGCCG;TGAATCCATATCACTATGAG	4	5.40689	3.30652	0.000170672	0.00403706	0.00403706	Positive	CR6
Smarcd1	4	539;559;933;3730	GGGTCTAATTTAAACTGGGG;GAAGCGGCTAGATATCCAGG;CAATCCGGCTAAGTCGGACG;GTACCGCTCTCCGATGCCCG	4	5.31754	3.90646	0.000209461	0.00460067	0.00454655	Positive	CR6
Suz12	4	218;358;555;7415	AGGAGCTGTAGACTTATCGT;AGTCCCTACTGGTAAAAAGC;GCTTCGGGCGGCAAATCCGG;CTGTTTAGAGTAACTCGTCC	3	5.87138	3.96991	7.76e-05	0.00234643	0.00234643	Positive	CR6
Syk	4	120;158;466;7678	GTCTTGGGCTGTACTCCCGG;CACACCACTACACCATCGAG;ATTGCACTACCGCATTGACA;CACCGGGTGGAATAATCTCA	3	6.09861	4.25306	5.43e-05	0.00182168	0.00178915	Positive	CR6
Taf6l	4	896;1044;2040;54026	ATACTACCAGCAAGTGACAC;GCACGCTGCCCACCAAGGAT;GAATATGTGACTGAGTAGAA;TCATGAAACACACCAAACGA	3	4.1836	2.84772	0.00276179	0.0292845	0.0292845	Positive	CR6
Tbpl1	4	695;716;1219;56596	TTCTGGCAAACGGATCTCAA;CAGACTACGGGCTAAACGTC;AATTTATAAGCGTGATGTTG;TCAGGAAAAATTATTTGCAC	3	4.84991	3.21348	0.000698205	0.0119277	0.0118182	Positive	CR6
Tfap4	4	86;265;515;15060	CGCATGCAGAGTATCAACGC;TGGACAAGGAGCGCTCCGTG;AGATGGAGAGAAGCTCAGCA;CATGTACCCGGAAAAACTCA	3	5.96862	4.17167	6.21e-05	0.00200887	0.00190843	Positive	CR6
Tfe3	4	90;488;829;47450	TCAAGTAGATTTCCAGACAC;GGCGATTCAACATTAACGAT;GGTAGCGTGTAGGGTTCTCG;TGGCCTGCAGTGATATTGGG	3	5.3501	3.78297	0.000201704	0.00465179	0.00448365	Positive	CR6
Tfpt	4	171;221;815;2338	TTCTACGATTTAGTTCCCGC;AGGATGTGGCCACCAAACAG;ATCTCGGTAGTCATCCCCGT;ATCAGGTGCAAAGGATAACT	4	6.12899	4.47693	4.65e-05	0.00159035	0.00159035	Positive	CR6
Tor1b	4	649;1555;1681;11633	GGAACGGCCCCTCAACACGT;CAATGCCTTGAGAATCACTT;GTAGCCGGTGAGCGCCGACA;CAGCTCCAGAAGTGGATCCG	3	4.43378	2.86298	0.0016369	0.0197391	0.0197391	Positive	CR6
Trem2	4	192;507;942;48024	ACTCTGAAGAACCTCCAAGC;TACCAGTGTCAGAGTCTCCG;TATGACGCCTTGAAGCACTG;CGAAACTCGATGACTCCTCG	3	5.18423	3.60756	0.000310313	0.0064329	0.00636142	Positive	CR6
Trim8	4	372;777;1992;2828	AGGGGTACGCTCTGTAGGAA;GGGACACTCGGTGTGTGACG;TTCAGGTGGCCGATCTTAGG;AGCTGCTGGATGAAGACTTG	4	5.79845	3.74978	9.31e-05	0.0027703	0.00268373	Positive	CR6
Trmt12	4	571;5648;7159;7722	CATCACCGAGAAACTTCGAG;CAGCGGACCACGTCACTCCG;GAGATACCGAGACTACCTGG;GTTCAACGTTTGGCAAAACG	4	4.05345	2.44174	0.00395649	0.039036	0.039036	Positive	CR6
Tyrobp	4	220;452;1147;5206	CTTGACCTCGGGAGACCAGG;CAATCCCAGCCAGTACACCA;AAGGAACAGAAGGCACCAGG;CTGTACGGGACTTAATCCTA	3	4.92883	3.83653	0.000550806	0.00996311	0.00996311	Positive	CR6
Ubr5	4	346;395;2523;5034	ACTTACAGCTGACATAAACG;GCTGTTCTTAGTACAGACCG;CCAATGGCCAAGGATTGCAT;AATGAGGTTTCTACGATCTG	4	4.79672	3.57674	0.000768025	0.0124299	0.0123218	Positive	CR6
Utp15	4	998;2550;2780;47956	GAGAGTACCGGCCATAAATG;TGTCCCAGACTTTAACATAG;GCTGTGGACGACTTTGTAGG;TACAGCTGACAATTATCATG	3	3.78452	2.44669	0.00611317	0.054487	0.054487	Positive	CR6
Vcp	4	49;212;1396;68760	ACTGTCTTCACAGACTCATG;CCAATCGCCTTAAAGAGCGC;CTTCAGGAGTTGGTTCAGGT;TATAGGTCGCTTTGACAGAG	3	4.67424	3.88585	0.00101628	0.0151212	0.0151084	Positive	CR6
Vmn2r120	4	618;1425;3374;5369	AGATAAAAGGAAACTTCACA;AGGACAAGTAGACCCGTGGA;GAAGTCACATTACCCTACAA;TCAGATGGCATGATCGAGTG	4	4.6848	3.11767	0.00100076	0.0150114	0.0150114	Positive	CR6
Vps52	4	234;349;1200;8820	CACGGCAAGAATTGTCGAGG;CCTACTACCGATCCTATGTG;TGTCGAAGATCCACACCCTG;CGTAACCGACAGGCAGTTCG	3	4.87027	3.58204	0.000690447	0.0120177	0.0118182	Positive	CR6
Zfp207	4	329;345;2960;60055	CAGTACCAAATGCAATACCT;GGAACACCTGGCATCAATGG;AATAGAATGATGCCAATGGG;GGTGGTCTATTAAGAATACC	2	3.95217	3.14773	0.00474004	0.0453128	0.0453128	Positive	CR6
Zfp367	4	304;1332;1876;41999	TAACAGGATGGAATCCGACG;CTGTAACAGGGTATTTCCAA;CGGCTGAACTCCCGACGCTG;CGATACCAGTACGCGCTTCG	3	4.29187	2.96757	0.00220322	0.0247863	0.0247863	Positive	CR6
Zfp692	4	866;4615;4688;5966	TGACATCAGATACTGAGGTG;AGTGGTGCCTCCTCAAGGAG;CTTAGGTGTGTGCGTAACAG;GAAGGTGCAGGAATCAAAGA	4	4.50164	2.68489	0.0014352	0.0187797	0.0187797	Positive	CR6

## Sheet: F) CW3 & CR6 comparison
This Study CW3 positive hits	This study CR6 positive hits		This study common positive hits between CW3 and CR6				This Study CW3 negative hits	This study CR6 negative hits		This study common negative hits between CW3 and CR6
0610010B08Rik	Abt1		Ahcy				N6amt1	Csde1		Crkl
2210418O10Rik	Actr5		Ash2l				Litaf	Rer1		Defa24
Aamp	Actr8		Atxn2l				Nmt1	Hdac3		Ifitm2
Actb	Adipor2		BC005624				Rer1	Prmt7		Litaf
Actr2	Ahcy		Bbx				Defa24	Ubl3		Rer1
Actr3	Arf1		Brd4				Plscr1	Ints3
Adam10	Ash2l		Btf3				Hspd1	Ccnc
Ahcy	Atat1		Cd300lf				Wdr33	Vmn1r101
Ambra1	Atp1b3		Cdkn1a				Elob	Vmn1r149
Apaf1	Atxn2l		Cebpb				Ankrd52	Ddx42
Ash2l	BB287469		Cfap20				Ifitm2	Gm3488
Atp2b1	Bbx		Clasrp				Ints7	Gm3317
Atxn2l	BC005624		Cmtr1				Acbd6	Tfdp1
Bbx	Brd4		Col4a3bp				Upf1	Crkl
BC005624	Brd9		Csnk2a1				Taz	Cmip
Bccip	Btf3		Csnk2b				Ttc14	Litaf
Bmyc	Canx		Dcaf7				Ilf3	Rnf130
Bop1	Casc3		Ddx39b				Crkl	Vps13d
Brd4	Ccnk		Dffa					Gabpb2
Bricd5	Cct4		Dpm2					Pak2
Brix1	Cd274		Dpy30					Dars2
Btf3	Cd300lf		Dynlt1a					Tmem41b
Casp3	Cdk12		Dynlt1b					Ndufa13
Casp9	Cdkn1a		Dyrk1a					Eif2s3x
Cd300lf	Cebpb		Ezh2					Rnf145
Cdc40	Cfap20		G3bp1					Ylpm1
Cdc5l	Clasrp		Gapvd1					Zfp574
Cdkn1a	Cmtr1		Hdac1					Pten
Cebpb	Cnot10		Ino80					Slc35a1
Cebpz	Col4a3bp		Itch					Vmn1r158
Cfap20	Cse1l		Kmt2d					Cdk6
Chp1	Csnk1a1		Lsm12					Ifitm2
Clasrp	Csnk2a1		Mettl14					Gm10406
Cmpk1	Csnk2b		Mettl3					Emsy
Cmtr1	Cul4b		Naca					Pdcd10
Col4a3bp	Cwf19l1		Nfrkb					AY761184
Cript	Dcaf7		Olfr126					Mbnl1
Csnk2a1	Ddi2		Olfr761					Defa24
Csnk2b	Ddx39b		Pagr1a					Snapc3
Cycs	Dffa		Pak1ip1					4930467E23Rik
Dcaf7	Dhfr		Paxip1					Gm15319
Ddx27	Dpm2		Pdcl					Srsf1
Ddx39b	Dpy30		Pkm
Ddx46	Drap1		Ppp1r10
Ddx54	Dynlt1a		Ppp4c
Ddx55	Dynlt1b		Prpf40a
Ddx56	Dyrk1a		Ptbp1
Dffa	Eed		Ptma
Dffb	Eif1a		Rabl6
Dnajc2	Elmsan1		Rad21
Dpm1	Etf1		Rbbp5
Dpm2	Ezh2		Rbm25
Dpy30	Fam91a1		Rhox4a
Dynlt1a	Fli1		Rhox4b
Dynlt1b	Fnbp4		Rhox4c
Dynlt1c	Fzr1		Rhox4d
Dynlt1f	G2e3		Rhox4e
Dyrk1a	G3bp1		Rhox4f
Ebna1bp2	Gapvd1		Rhox4g
Eif5b	Gm11559		Rpl10a
Eif6	Gm11567		Rreb1
Emc6	Gm11568		Sec62
Ezh2	Gm1604b		Sf1
Fam50a	Gm2016		Sf3a3
Fam96b	Gm2022		Sf3b3
Ftsj3	Gm21319		Sf3b5
G3bp1	Gm4027		Shoc2
Gapvd1	Gm5662		Smarca4
Gemin7	Gm5934		Smarcc1
Gm13271	Gm8300		Smarce1
Gm13547	Gm9992		Smc3
Gm14296	Gnb2		Snrpb2
Gm14305	Gpank1		Sptlc1
Gm14308	H2-Q7		Sptlc2
Gm14322	H2-Q9		Sptssa
Gm14325	Hdac1		Srsf7
Gm14326	Hdlbp		Stag2
Gm14391	Hist1h4m		Stat1
Gm14434	Hist1h4n		Tmem30a
Gm3417	Hmgb1		Traf2
Gm3448	Hnrnpu		Trir
Gm4724	Ifnar1		Uba52
Gm6710	Ifnar2		Ubr4
Gml	Ilf2		Uchl5
Gosr1	Ino80		Unc93a
Gpat4	Irf9		Usp16
Gpr21	Itch		Vapa
Gtpbp4	Jak1		Wdr82
H2-Ke6	Keap1		Wtap
H2-T3	Kmt2c
Hdac1	Kmt2d
Hnrnpf	Krtap4-13
Hnrnph1	Krtap4-8
Icmt	Krtap9-1
Ino80	Lsm12
Itch	Med20
Kcmf1	Med24
Kdm1a	Metap2
Khdrbs1	Mettl14
Kmt2b	Mettl3
Kmt2d	Naca
Las1l	Ncoa6
Ldha	Nfrkb
Lsg1	Nkx1-1
Lsm12	Nufip2
Ly6c1	Olfr122
Ly6c2	Olfr126
Mak16	Olfr55
Mamdc4	Olfr761
Mau2	Pagr1a
Mdm4	Pak1ip1
Mettl14	Papola
Mettl26	Paxip1
Mettl3	Pdcl
Msto1	Phf1
Naa15	Pkm
Naca	Ppargc1a
Ncl	Ppp1r10
Nfrkb	Ppp4c
Nhlrc2	Prkcd
Nifk	Prkd3
Ninj1	Prpf40a
Nip7	Prr22
Nipbl	Prrc2c
Nle1	Psmb6
Nmd3	Psmd11
Noc3l	Psmg2
Nop16	Ptbp1
Ntmt1	Ptma
Nubp2	Rabl6
Olfr1080	Rad21
Olfr115	Rai14
Olfr126	Rasgrp3
Olfr128	Rbbp5
Olfr1281	Rbm25
Olfr133	Rhox2a
Olfr761	Rhox2e
Pabpc1	Rhox3a
Pagr1a	Rhox3c
Pak1ip1	Rhox3e
Paxip1	Rhox3f
Pcyt2	Rhox3h
Pdcl	Rhox4a
Pfn1	Rhox4b
Pgk1	Rhox4c
Pgp	Rhox4d
Phf5a	Rhox4e
Pkm	Rhox4f
Pknox1	Rhox4g
Plin3	Rnf126
Plin4	Rpl10a
Ppa1	Rps6ka5
Ppcdc	Rreb1
Ppcs	Safb2
Ppih	Samd1
Ppp1r10	Sec61b
Ppp4c	Sec62
Prpf40a	Sf1
Ptar1	Sf3a3
Ptbp1	Sf3b3
Ptchd4	Sf3b4
Ptges2	Sf3b5
Ptma	Shoc2
Ptpa	Sin3a
Ptprm	Slc22a7
Puf60	Slc27a4
Pycrl	Slc35b2
Rabl6	Slf2
Rad21	Smad4
Rbbp5	Smarca4
Rbm22	Smarcc1
Rbm25	Smarcd1
Rhox4a	Smarce1
Rhox4b	Smc3
Rhox4c	Snrpb2
Rhox4d	Sptlc1
Rhox4e	Sptlc2
Rhox4f	Sptssa
Rhox4g	Srsf7
Rif1	Stag2
Rnf151	Stat1
Rpl10	Suz12
Rpl10a	Syk
Rpl11	Taf6l
Rpl13	Tbpl1
Rpl14	Tfap4
Rpl15	Tfe3
Rpl18	Tfpt
Rpl19	Tmem30a
Rpl23	Tor1b
Rpl24	Traf2
Rpl26	Trem2
Rpl3	Trim8
Rpl32	Trir
Rpl35a	Trmt12
Rpl36	Tyrobp
Rpl36al	Uba52
Rpl37	Ubr4
Rpl37a	Ubr5
Rpl37rt	Uchl5
Rpl38	Unc93a
Rpl4	Usp16
Rpl6	Utp15
Rpl7	Vapa
Rpl7a	Vcp
Rpl7l1	Vmn2r120
Rpl8	Vps52
Rpl9	Wdr82
Rplp0	Wtap
Rplp1	Zfp207
Rplp2	Zfp367
Rreb1	Zfp692
Rsl1d1
Rsl24d1
Sbds
Sbp
Sdad1
Sec23b
Sec62
Sf1
Sf3a1
Sf3a2
Sf3a3
Sf3b1
Sf3b2
Sf3b3
Sf3b5
Sgf29
Shoc2
Slc4a7
Smarca4
Smarcb1
Smarcc1
Smarce1
Smc3
Snrpb2
Snupn
Spout1
Sptlc1
Sptlc2
Sptssa
Srm
Srsf11
Srsf3
Srsf7
Stag2
Stat1
Tank
Tcte3
Tmem30a
Tmx2
Tor1a
Tprn
Traf2
Traf3
Trir
Ttc33
Ttf1
U2af2
Uba52
Ubr4
Uchl5
Unc93a
Uqcc2
Urb1
Usp16
Vapa
Vcpip1
Virma
Vmac
Vmn2r93
Wasf2
Wdr12
Wdr18
Wdr74
Wdr82
Wrap53
Wtap
Zc3h13

## Sheet: G) Previous Screens - Positives
		Orchard et al CW3 Positive hits	This Study CW3 positive hits	CW3 common hits		Orchard et al CR6 positive hits	This study CR6 positive hits	CR6 Common hits		CW3 & CR6 Common positive hits across all screens
		Cd300lf	Cd300lf	Cd300lf		G3bp1	Cd300lf	Cd300lf		Cd300lf
		G3bp1	Mettl14	G3bp1		Cd300lf	Mettl14	Dyrk1a		G3bp1
		Kmt2d	G3bp1	Kmt2d		Tmem30a	Sptlc2	G3bp1		Kmt2d
		Kdm6a	Csnk2b	Rpl37		Sptlc2	G3bp1	Kmt2d		Smarce1
		Cd300lh	Smarce1	Rpl7a		Cd300lh	Csnk2b	Smarce1
		Myo10	Srsf7	Rplp2		Kmt2d	Smarce1	Sptlc1
		Rps8	Sptlc2	Smarce1		Dyrk1a	Stag2	Sptlc2
		Gapdh	Mettl3			Sptlc1	Tmem30a	Tmem30a
		Rpl29	Ppcdc			Smarce1	Kmt2d
		Pik3ap1	Kmt2d			Kdm6a	Prpf40a
		Smarce1	Rpl10a			Rps8	Sptlc1
		Rps4x	Usp16			Gapdh	Dyrk1a
		Prkaa1	Prpf40a			Rpl29	Cdkn1a
		Tbck	Stag2			Rps20	Snrpb2
		Med9	Wtap			Sdhd	Pagr1a
		Sdhd	Paxip1			Rps4x	Stat1
		Rps20	Dyrk1a			Psmb4	Lsm12
		Psmb4	Ubr4			Rplp2	Mettl3
		Rplp2	Ppcs			Pik3ap1	Atxn2l
		Polr2e	Sptlc1			Med9	Paxip1
		Rpl7a	Rbm25			Fez1	Sec62
		Cflar	Pak1ip1			Rpl7a	Wtap
		Fez1	Tmem30a			Polr2e	Wdr82
		Atp5g3	Ash2l			Cflar	Hmgb1
		Polr2l	Wdr82			Ubxn4	Trir
		Rpl34	Smarca4			Rpl34	Ptma
		Ubxn4	Srm			Polr2l	Papola
		Olfr1254	Uba52			Rps24	Rhox3f
		Rps24	Csnk2a1			Rnf151	Rhox4a
		Birc3	Rbbp5			Cct2	Sec61b
		Rpl37	Ppp4c			BC061237	Rhox4c
		Rrm2	Hdac1			Rrm2	Uchl5
		BC061237	Aamp			Rpl37	Rpl10a
		Cct2	Rpl10			Rhot2	Gnb2
		Hspa5	Snrpb2				Gm8300
		Hnrnpa3	Ptbp1				Dpy30
		Eif5a	Bccip				Ezh2
		Tnfrsf1a	Vapa				Bbx
			Sbds				Nfrkb
			Gpat4				Nufip2
			Chp1				Rbm25
			Ddx55				Nkx1-1
			Smc3				Sf1
			Smarcb1				Hdac1
			Sec62				Krtap4-8
			Dpy30				Gm5662
			Ahcy				Cfap20
			Wdr18				Ptbp1
			Ppa1				Dcaf7
			Snupn				Shoc2
			Sf3b2				Clasrp
			Rpl7l1				Rhox3c
			Pdcl				Psmg2
			Rbm22				Tfpt
			Sdad1				Syk
			Btf3				Fam91a1
			Dcaf7				Tfap4
			Cycs				Gm2016
			Smarcc1				Brd4
			Nmd3				Ilf2
			Trir				Suz12
			Virma				Trim8
			Mau2				Prrc2c
			Kcmf1				Actr8
			Nip7				Ubr4
			Dynlt1a				Smarcc1
			Nop16				Sptssa
			Bbx				Ppp1r10
			Pkm				Usp16
			Mak16				Btf3
			Rpl24				Naca
			Tcte3				Adipor2
			Gm3448				Rhox4g
			Pagr1a				Rhox4e
			Rpl14				Rhox4d
			Rpl38				Rhox4b
			Rpl7				Ppp4c
			Gm14325				Smad4
			Hnrnph1				Arf1
			Sf3a3				Tfe3
			Sptssa				Cmtr1
			Eif6				Brd9
			Actr3				Cul4b
			Casp9				Smarcd1
			Gm14305				Drap1
			Uchl5				Pkm
			Ddx54				Prkd3
			Eif5b				Olfr122
			Rpl3				Trem2
			Sf1				Gm21319
			Gm3417				Smarca4
			Pfn1				Rad21
			Tmx2				Smc3
			Rplp0				Gm2022
			Nle1				Sf3b4
			Atp2b1				Hdlbp
			Dpm2				Srsf7
			Rif1				Eed
			Rsl1d1				Fnbp4
			Sf3b5				Ash2l
			Dynlt1f				Rasgrp3
			Dynlt1c				Tyrobp
			Ezh2				Fzr1
			Ptma				Gm11568
			Rpl4				Gm11559
			Ftsj3				Vps52
			Noc3l				Keap1
			Dffb				Tbpl1
			Gm14308				Kmt2c
			Gm14434				Cwf19l1
			Gm4724				Actr5
			0610010B08Rik				Cdk12
			U2af2				Gm1604b
			Ino80				Ubr5
			Cmtr1				Ino80
			Traf2				Slf2
			Uqcc2				Rabl6
			Ptpa				Vapa
			Cdkn1a				Ifnar1
			Pabpc1				Dynlt1a
			Fam96b				Rhox4f
			Cdc40				Csnk1a1
			Ninj1				Vmn2r120
			Sf3b1				Vcp
			Rpl32				Sf3b3
			Lsg1				Gm11567
			Ppih				Cebpb
			Rsl24d1				Rnf126
			Rpl26				Pak1ip1
			Dynlt1b				Csnk2a1
			Ttc33				Ppargc1a
			Sf3b3				Rhox3e
			Brix1				Rhox3a
			Ldha				Elmsan1
			Wasf2				Safb2
			H2-Ke6				Metap2
			Gm14322				Slc35b2
			Cript				Sf3b5
			BC005624				Canx
			Rpl8				Traf2
			Nfrkb				Zfp692
			Rpl35a				Hist1h4n
			Spout1				Hist1h4m
			Bop1				Etf1
			Naca				Jak1
			Gm6710				Ncoa6
			Gm14391				Dffa
			Dffa				Gm9992
			Vcpip1				Unc93a
			Sec23b				Pdcl
			Wdr12				Hnrnpu
			Zc3h13				Rhox3h
			Pknox1				Tor1b
			Rpl37				Fli1
			Cfap20				Rreb1
			Cdc5l				Cd274
			Atxn2l				Psmb6
			Casp3				Rbbp5
			Ddx39b				Phf1
			Srsf3				Prr22
			Icmt				Olfr761
			Sgf29				Col4a3bp
			Stat1				Ifnar2
			Rpl7a				Zfp367
			Cmpk1				Olfr55
			Gm14326				Psmd11
			Rhox4f				Cct4
			Clasrp				Ddx39b
			Tor1a				Rps6ka5
			Col4a3bp				Rai14
			Gpr21				Prkcd
			Actr2				Ahcy
			Las1l				Eif1a
			Apaf1				Taf6l
			Vmac				Gm5934
			Rhox4c				Gapvd1
			Rhox4d				Sin3a
			Rhox4b				Gpank1
			Rhox4e				Itch
			Dnajc2				Cse1l
			Kmt2b				Irf9
			Sf3a1				BC005624
			Itch				Slc22a7
			Rnf151				Atat1
			Gm14296				Samd1
			2210418O10Rik				G2e3
			Dpm1				Trmt12
			Pycrl				Med24
			Ncl				Sf3a3
			Rpl9				Rhox2a
			Cebpz				Rhox2e
			Plin3				Krtap4-13
			Hnrnpf				Zfp207
			Puf60				Olfr126
			Ptprm				Casc3
			Nubp2				Uba52
			Olfr1080				H2-Q9
			Nhlrc2				H2-Q7
			Wdr74				Krtap9-1
			Ambra1				Ddi2
			Nifk				Atp1b3
			Mettl26				Med20
			Olfr133				Gm4027
			Shoc2				BB287469
			Ptges2				Abt1
			Rpl19				Dpm2
			H2-T3				Utp15
			Slc4a7				Dynlt1b
			Gosr1				Ccnk
			Ddx56				Slc27a4
			Tank				Dhfr
			Rreb1				Cnot10
			Ddx27
			Traf3
			Olfr128
			Phf5a
			Ptar1
			Kdm1a
			Ebna1bp2
			Urb1
			Olfr761
			Rad21
			Fam50a
			Sf3a2
			Rplp1
			Naa15
			Rpl11
			Nipbl
			Wrap53
			Rpl6
			Olfr115
			Bricd5
			Msto1
			Lsm12
			Mdm4
			Srsf11
			Gml
			Khdrbs1
			Ppp1r10
			Ttf1
			Plin4
			Rhox4a
			Unc93a
			Pgk1
			Rpl23
			Cebpb
			Rpl18
			Olfr126
			Rplp2
			Tprn
			Pcyt2
			Gemin7
			Rpl37rt
			Rpl15
			Adam10
			Ly6c2
			Ly6c1
			Gtpbp4
			Ptchd4
			Pgp
			Sbp
			Rpl36al
			Actb
			Ddx46
			Mamdc4
			Rabl6
			Brd4
			Rhox4g
			Rpl37a
			Rpl36
			Rpl13
			Emc6
			Vmn2r93
			Ntmt1
			Gm13271
			Olfr1281
			Gm13547
			Bmyc
			Gapvd1

## Sheet: H) Overrepresentation analysis
GeneSet	Description	link	size	overlap	expect	enrichmentRatio	pValue	FDR	overlapId	userId
GO:0006397	mRNA processing	http://amigo.geneontology.org/amigo/term/GO:0006397	487	16	2.36807	6.75656	1.10624e-09	4.90391e-07	1859;5725;6432;6629;7536;7919;9589;10946;11129;23070;23450;55660;56339;57721;58517;83443	CLASRP;CMTR1;DDX39B;DYRK1A;METTL14;METTL3;PRPF40A;PTBP1;RBM25;SF1;SF3A3;SF3B3;SF3B5;SNRPB2;SRSF7;WTAP
GO:0008380	RNA splicing	http://amigo.geneontology.org/amigo/term/GO:0008380	417	15	2.02769	7.39758	1.15386e-09	4.90391e-07	1859;5725;6432;6629;7536;7919;9589;10946;11129;23450;55660;56339;57721;58517;83443	CLASRP;DDX39B;DYRK1A;METTL14;METTL3;PRPF40A;PTBP1;RBM25;SF1;SF3A3;SF3B3;SF3B5;SNRPB2;SRSF7;WTAP
GO:0032259	methylation	http://amigo.geneontology.org/amigo/term/GO:0032259	346	13	1.68245	7.72684	1.01248e-08	2.86869e-06	191;2146;5929;8085;9070;9589;22976;23070;23476;56339;57721;80335;84661	AHCY;ASH2L;BRD4;CMTR1;DPY30;EZH2;KMT2D;METTL14;METTL3;PAXIP1;RBBP5;WDR82;WTAP
GO:1904837	beta-catenin-TCF complex assembly	http://amigo.geneontology.org/amigo/term/GO:1904837	30	5	0.145877	34.2755	3.06078e-07	6.50415e-05	3065;5929;6597;8085;9070	ASH2L;HDAC1;KMT2D;RBBP5;SMARCA4
GO:0008213	protein alkylation	http://amigo.geneontology.org/amigo/term/GO:0008213	174	8	0.846086	9.4553	1.95308e-06	0.000332024	2146;5929;8085;9070;22976;23476;80335;84661	ASH2L;BRD4;DPY30;EZH2;KMT2D;PAXIP1;RBBP5;WDR82
GO:1903311	regulation of mRNA metabolic process	http://amigo.geneontology.org/amigo/term/GO:1903311	266	8	1.29344	6.18505	4.32502e-05	0.00612711	1859;5725;6432;7311;9589;56339;57721;58517	DYRK1A;METTL14;METTL3;PTBP1;RBM25;SRSF7;UBA52;WTAP
GO:0016569	covalent chromatin modification	http://amigo.geneontology.org/amigo/term/GO:0016569	468	10	2.27568	4.39429	8.36905e-05	0.00935978	2146;3065;5929;8085;9070;10600;22976;23476;80335;84661	ASH2L;BRD4;DPY30;EZH2;HDAC1;KMT2D;PAXIP1;RBBP5;USP16;WDR82
GO:0006338	chromatin remodeling	http://amigo.geneontology.org/amigo/term/GO:0006338	150	6	0.729385	8.22611	8.80921e-05	0.00935978	3065;5757;6597;6599;6605;54617	HDAC1;INO80;PTMA;SMARCA4;SMARCC1;SMARCE1
GO:1903706	regulation of hemopoiesis	http://amigo.geneontology.org/amigo/term/GO:1903706	389	9	1.89154	4.75803	0.000107179	0.0101225	1051;3065;5929;6772;8085;9070;56339;83737;84661	ASH2L;CEBPB;DPY30;HDAC1;ITCH;KMT2D;METTL3;RBBP5;STAT1
GO:0018205	peptidyl-lysine modification	http://amigo.geneontology.org/amigo/term/GO:0018205	360	8	1.75052	4.57006	0.000348313	0.0296066	2146;5929;8085;9070;22976;23476;80335;84661	ASH2L;BRD4;DPY30;EZH2;KMT2D;PAXIP1;RBBP5;WDR82
GO:0006643	membrane lipid metabolic process	http://amigo.geneontology.org/amigo/term/GO:0006643	202	6	0.982238	6.1085	0.00044243	0.0320219	8818;9218;9517;10087;10558;171546	COL4A3BP;DPM2;SPTLC1;SPTLC2;SPTSSA;VAPA
GO:0051702	interaction with symbiont	http://amigo.geneontology.org/amigo/term/GO:0051702	74	4	0.35983	11.1164	0.000457346	0.0320219	3065;6597;9126;9218	HDAC1;SMARCA4;SMC3;VAPA
GO:0070646	protein modification by small protein removal	http://amigo.geneontology.org/amigo/term/GO:0070646	288	7	1.40042	4.99851	0.000489747	0.0320219	4798;7186;7311;10600;51377;54617;83737	INO80;ITCH;NFRKB;TRAF2;UBA52;UCHL5;USP16
GO:0061008	hepaticobiliary system development	http://amigo.geneontology.org/amigo/term/GO:0061008	140	5	0.680759	7.34474	0.000592047	0.0359457	1051;1460;2146;5315;7919	CEBPB;CSNK2B;DDX39B;EZH2;PKM
GO:0072331	signal transduction by p53 class mediator	http://amigo.geneontology.org/amigo/term/GO:0072331	218	6	1.06004	5.66017	0.000661351	0.0374766	1026;1457;1460;1859;22976;55003	CDKN1A;CSNK2A1;CSNK2B;DYRK1A;PAK1IP1;PAXIP1
GO:0051052	regulation of DNA metabolic process	http://amigo.geneontology.org/amigo/term/GO:0051052	405	8	1.96934	4.06228	0.000757878	0.0402623	1676;5514;5531;7919;9126;10735;22976;54617	DDX39B;DFFA;INO80;PAXIP1;PPP1R10;PPP4C;SMC3;STAG2
