# Supplementary figures and images for: Noroviruses subvert the core stress granule component G3BP1 to promote viral VPg-dependent translation
Source: eLife journal article supplement (doi:10.7554/elife.46681), 2019-08-12

Figure 2 - figure supplement 1

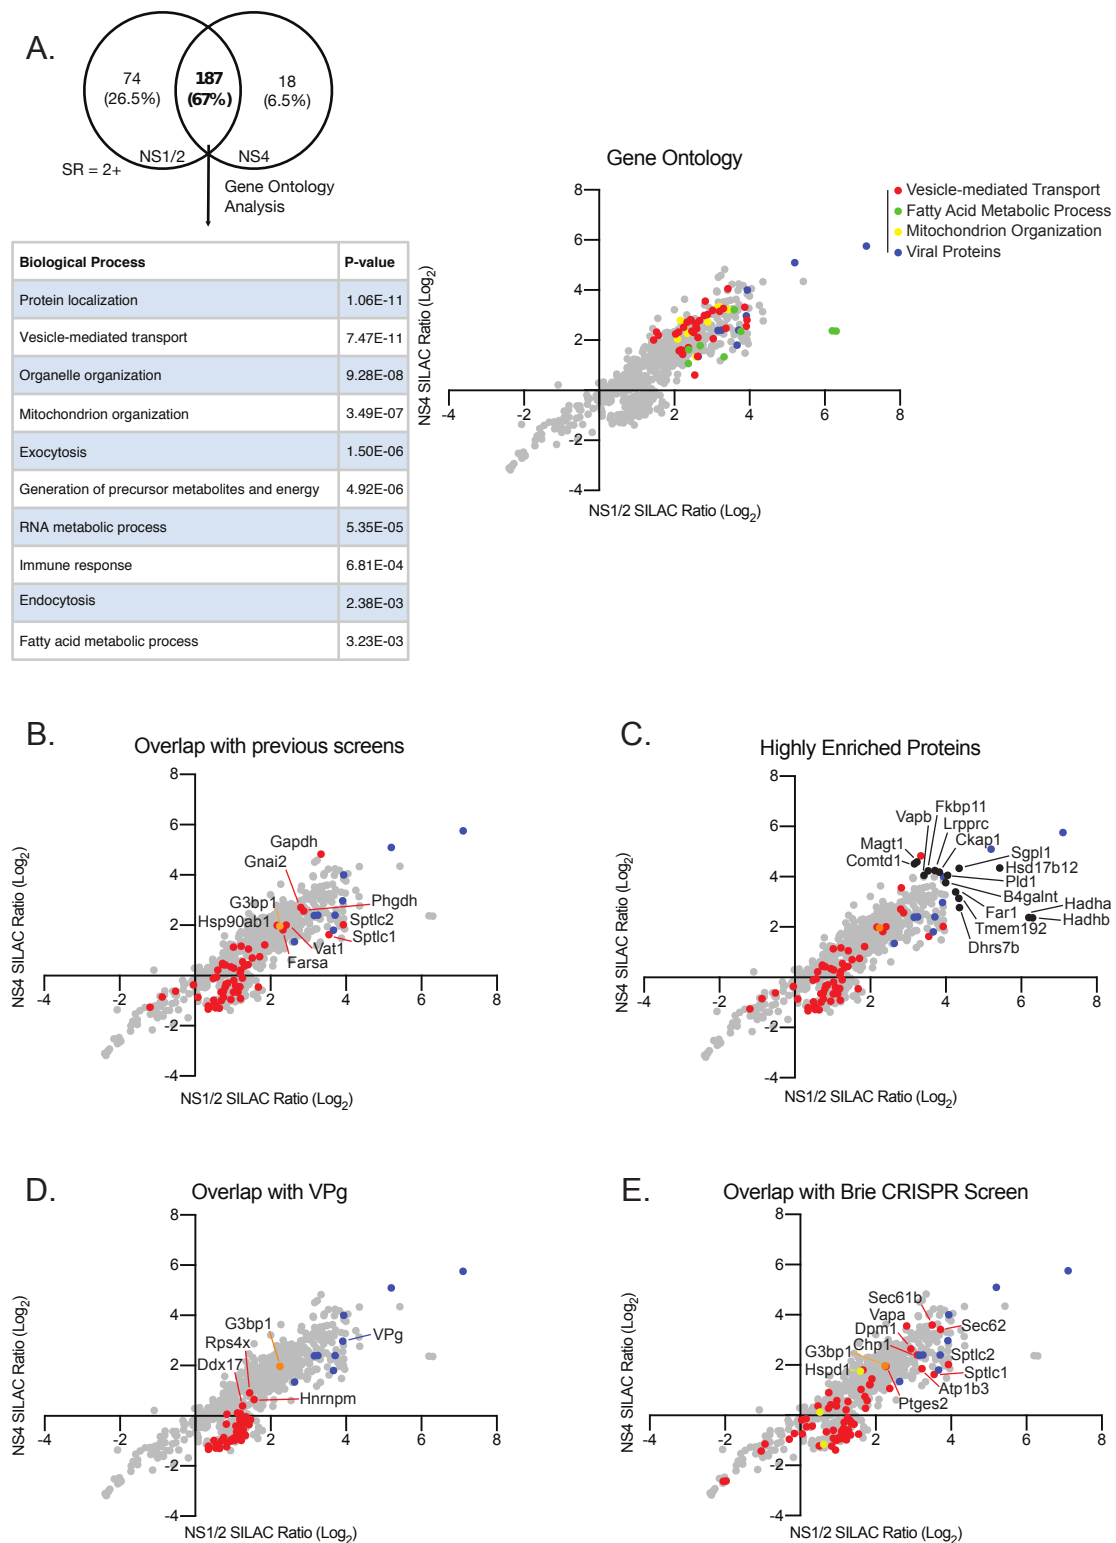

Supplement: supp [file elife-46681-supp-v1.zip]

Figure 9 - figure supplement 1

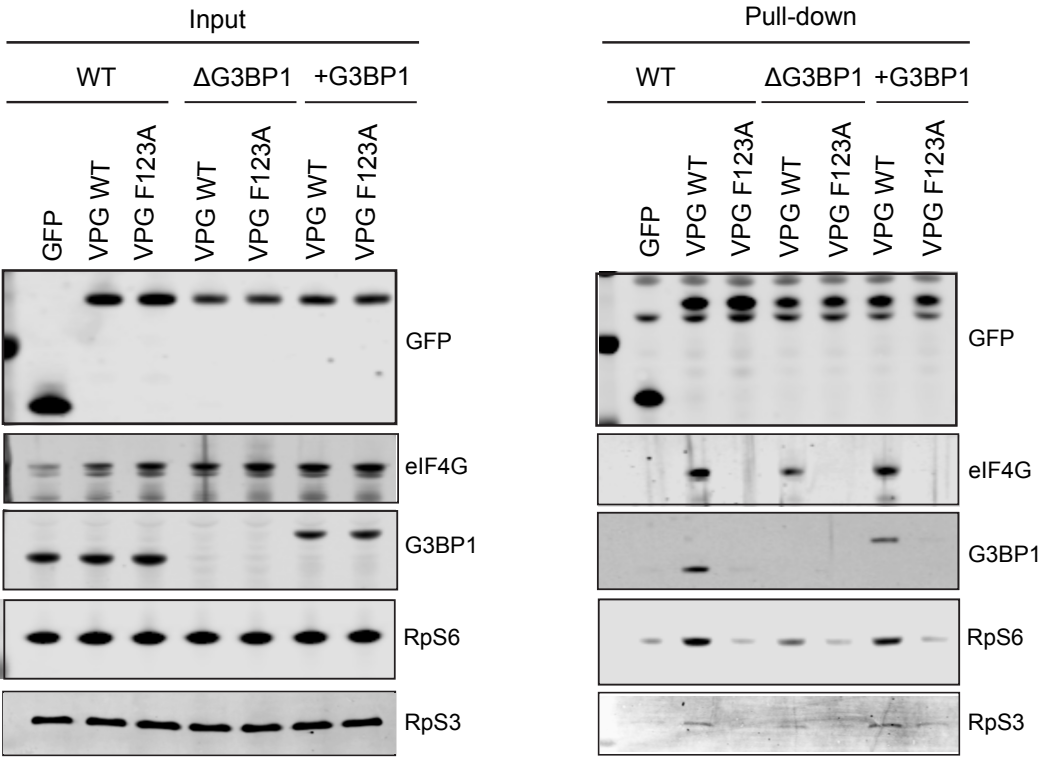

Supplement: supp [file elife-46681-supp-v1.zip]

Figure 11 - figure supplement 1

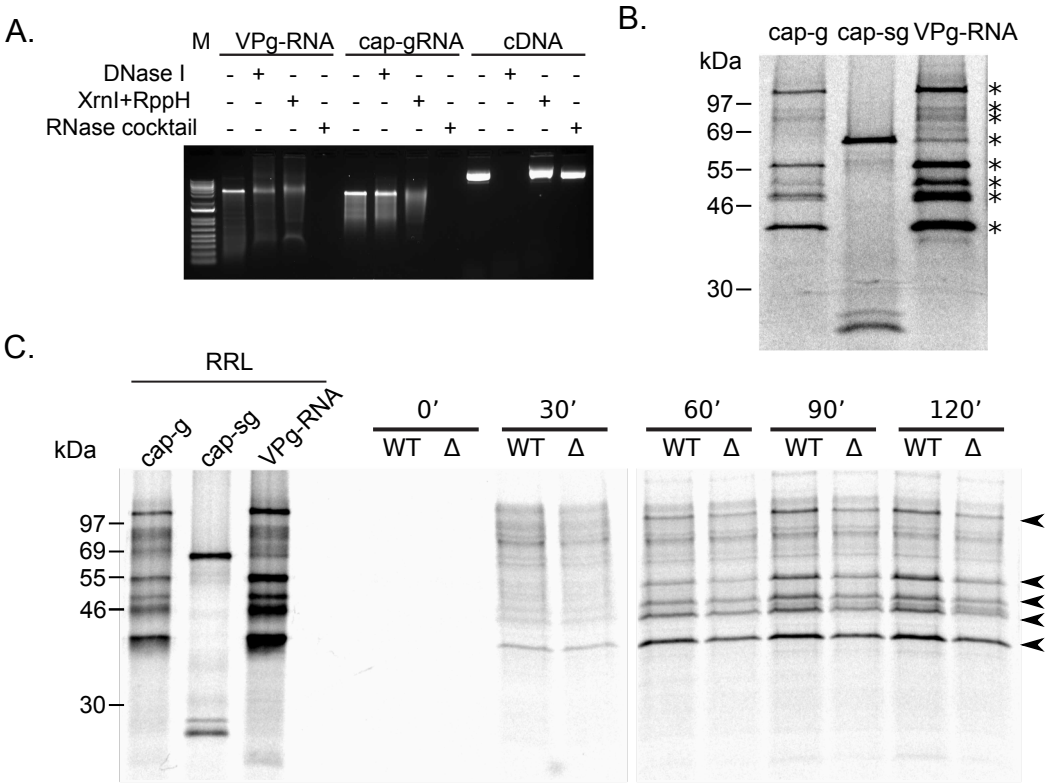

Supplement: supp [file elife-46681-supp-v1.zip]

Figure 2 - figure supplement 2

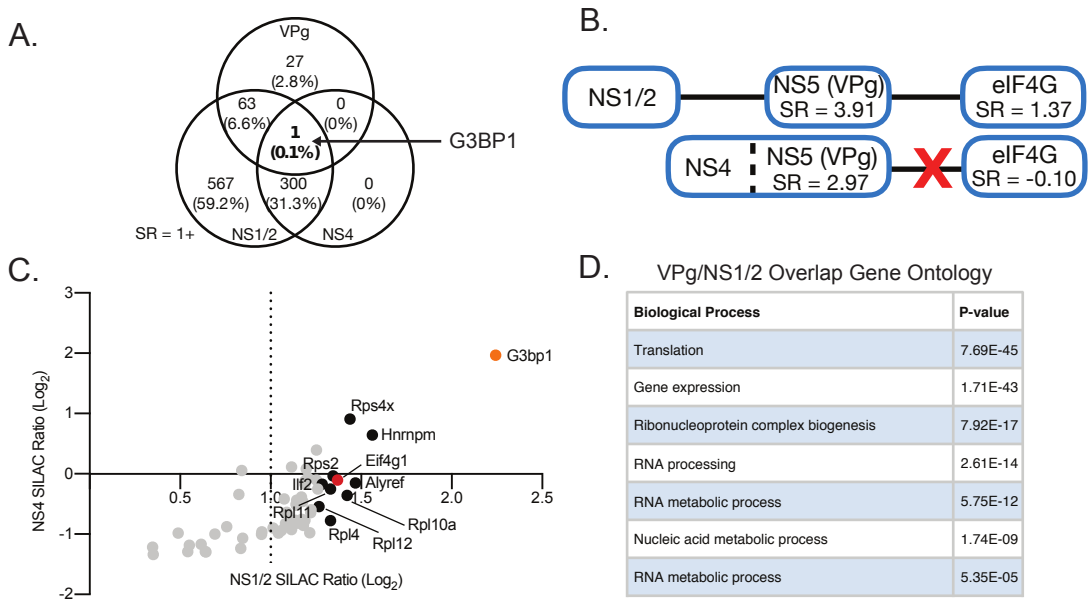

Supplement: supp [file elife-46681-supp-v1.zip]

### A. Host proteins binding to the murine norovirus VPg protein

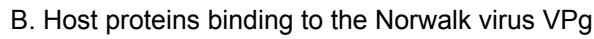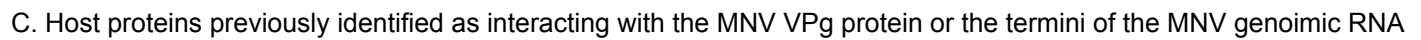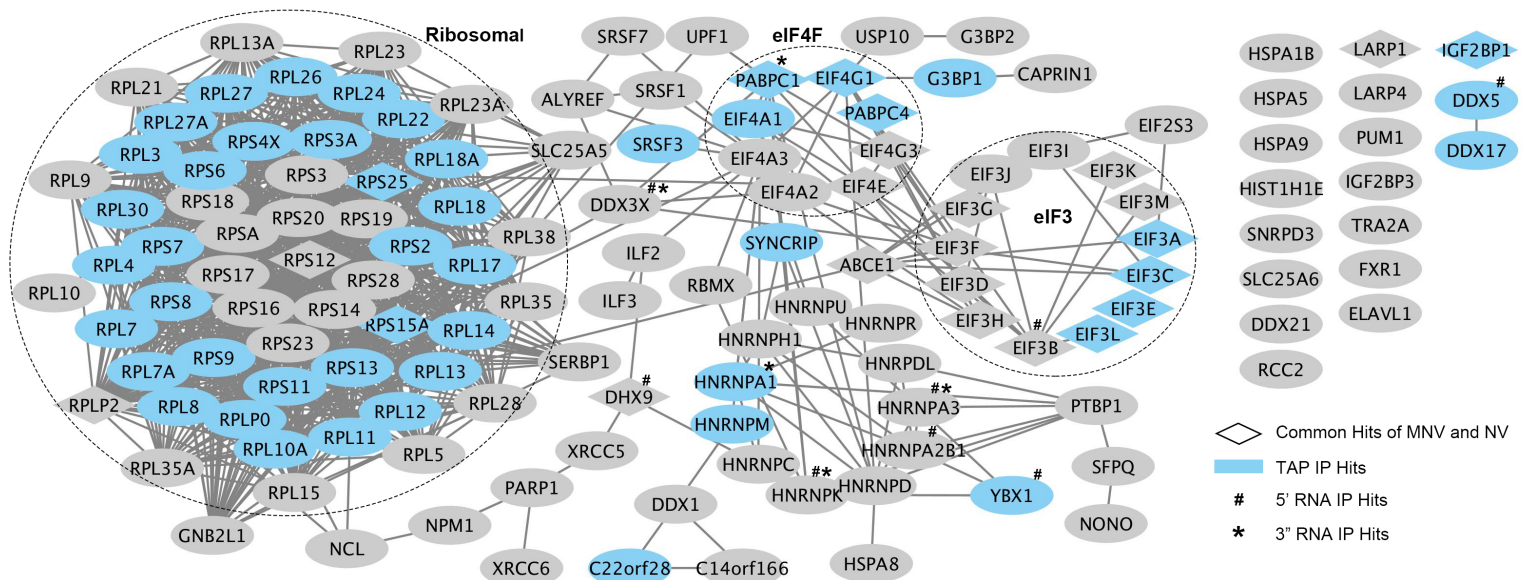

Supplement: supp [file elife-46681-supp-v1.zip]
